# Supplementary material
Source: publisher figshare collection journal article supplement (https://acs.figshare.com/ndownloader/files/10664050)
Supplement: Supplementary file 1 [file 10664050]

 
data_AFPas1a-20161124_twin1_hklf5_LIST4
 
_audit_creation_method            'SHELXL-2016/6'
_shelx_SHELXL_version_number      '2016/6'
_chemical_name_systematic         ?
_chemical_name_common             ?
_chemical_melting_point           ?
_chemical_formula_moiety          'Al78 Fe23.78 Pt0.22'
_chemical_formula_sum
 'Al78 Fe23.78 Pt0.22' 
_chemical_formula_weight          3474.91

loop_
 _atom_type_symbol
 _atom_type_description
 _atom_type_scat_dispersion_real
 _atom_type_scat_dispersion_imag
 _atom_type_scat_source
 'Pt'  'Pt'  -1.7033   8.3905
 'International Tables Vol C Tables 4.2.6.8 and 6.1.1.4'
 'Fe'  'Fe'   0.3463   0.8444
 'International Tables Vol C Tables 4.2.6.8 and 6.1.1.4'
 'Al'  'Al'   0.0645   0.0514
 'International Tables Vol C Tables 4.2.6.8 and 6.1.1.4'
 
_space_group_crystal_system       monoclinic
_space_group_IT_number            12
_space_group_name_H-M_alt         'C 2/m'
_space_group_name_Hall            '-C 2y'
 
_shelx_space_group_comment
;
The symmetry employed for this shelxl refinement is uniquely defined
by the following loop, which should always be used as a source of
symmetry information in preference to the above space-group names.
They are only intended as comments.
;
 
loop_
 _space_group_symop_operation_xyz
 'x, y, z'
 '-x, y, -z'
 'x+1/2, y+1/2, z'
 '-x+1/2, y+1/2, -z'
 '-x, -y, -z'
 'x, -y, z'
 '-x+1/2, -y+1/2, -z'
 'x+1/2, -y+1/2, z'
 
_cell_length_a                    15.4634(3)
_cell_length_b                    8.07010(17)
_cell_length_c                    12.4586(3)
_cell_angle_alpha                 90
_cell_angle_beta                  107.686(2)
_cell_angle_gamma                 90
_cell_volume                      1481.24(6)
_cell_formula_units_Z             1
_cell_measurement_temperature     113(2)
_cell_measurement_reflns_used     19483
_cell_measurement_theta_min       2.7580
_cell_measurement_theta_max       43.8170

_exptl_crystal_description        'prism'
_exptl_crystal_colour             'metallic'
_exptl_crystal_density_meas       ?
_exptl_crystal_density_method     ?
_exptl_crystal_density_diffrn     3.896          
_exptl_crystal_F_000              1649.2
_exptl_transmission_factor_min    ?
_exptl_transmission_factor_max    ?
_exptl_crystal_size_max           ?
_exptl_crystal_size_mid           ?
_exptl_crystal_size_min           ?
_exptl_absorpt_coefficient_mu     7.317
_shelx_estimated_absorpt_T_min    ?
_shelx_estimated_absorpt_T_max    ?
_exptl_absorpt_correction_type    'multi-scan'
_exptl_absorpt_correction_T_min   0.84139
_exptl_absorpt_correction_T_max   1.00000
_exptl_absorpt_process_details
;
CrysAlisPro, Agilent Technologies,
Version 1.171.37.35 (release 13-08-2014 CrysAlis171 .NET)
(compiled Aug 13 2014,18:06:01)
Empirical absorption correction using spherical harmonics,
 implemented in SCALE3 ABSPACK scaling algorithm.
;
_exptl_absorpt_special_details    ?
_diffrn_ambient_temperature       113(2)
_diffrn_radiation_probe 'x-ray'
_diffrn_radiation_type 'Mo K\a'
_diffrn_radiation_wavelength 0.71073
_diffrn_radiation_monochromator 'graphite'
_diffrn_source                    ?
_diffrn_measurement_device 'abstract diffractometer'
_diffrn_measurement_device_type 'Saxi-CrysAlisPro-abstract goniometer imported SAXI images'
_diffrn_detector 'CCD plate'
_diffrn_detector_area_resol_mean  ?
_diffrn_reflns_number             11636
_diffrn_reflns_av_unetI/netI      0.0008
_diffrn_reflns_av_R_equivalents 0.0267
_diffrn_reflns_limit_h_min        -30
_diffrn_reflns_limit_h_max        30
_diffrn_reflns_limit_k_min        -15
_diffrn_reflns_limit_k_max        15
_diffrn_reflns_limit_l_min        -24
_diffrn_reflns_limit_l_max        24
_diffrn_reflns_theta_min          2.765
_diffrn_reflns_theta_max          43.875
_diffrn_reflns_theta_full         25.242
_diffrn_measured_fraction_theta_max   0.976
_diffrn_measured_fraction_theta_full  0.999
_diffrn_reflns_Laue_measured_fraction_max    0.976
_diffrn_reflns_Laue_measured_fraction_full   0.999
_diffrn_reflns_point_group_measured_fraction_max   0.976
_diffrn_reflns_point_group_measured_fraction_full  0.999
_reflns_number_total              11636
_reflns_number_gt                 11587
_reflns_threshold_expression      'I > 2\s(I)'
_reflns_Friedel_coverage          0.000
_reflns_Friedel_fraction_max      .
_reflns_Friedel_fraction_full     .
 
_reflns_special_details
;
 _reflns_Friedel_fraction is defined as the number of unique
 Friedel pairs measured divided by the number that would be
 possible theoretically, ignoring centric projections and
 systematic absences.
;
 
_computing_data_collection        ?
_computing_cell_refinement        ?
_computing_data_reduction         ?
_computing_structure_solution     ?
_computing_structure_refinement 'SHELXL-2016/6 (Sheldrick, 2016)'
_computing_molecular_graphics     ?
_computing_publication_material   ?
_refine_special_details
;
 Refined as a 2-component twin.
;
_refine_ls_structure_factor_coef  Fsqd
_refine_ls_matrix_type            full
_refine_ls_weighting_scheme       calc
_refine_ls_weighting_details
'w=1/[\s^2^(Fo^2^)+(0.0540P)^2^+1.7072P] where P=(Fo^2^+2Fc^2^)/3'
_atom_sites_solution_primary      ?
_atom_sites_solution_secondary    ?
_atom_sites_solution_hydrogens    .
_refine_ls_hydrogen_treatment     undef
_refine_ls_extinction_method      'SHELXL-2016/6 (Sheldrick 2016)'
_refine_ls_extinction_coef        0.0075(3)
_refine_ls_extinction_expression
 'Fc^*^=kFc[1+0.001xFc^2^\l^3^/sin(2\q)]^-1/4^'
_refine_ls_number_reflns          11636
_refine_ls_number_parameters      139
_refine_ls_number_restraints      0
_refine_ls_R_factor_all           0.0286
_refine_ls_R_factor_gt            0.0283
_refine_ls_wR_factor_ref          0.0860
_refine_ls_wR_factor_gt           0.0820
_refine_ls_goodness_of_fit_ref    1.163
_refine_ls_restrained_S_all       1.163
_refine_ls_shift/su_max           0.003
_refine_ls_shift/su_mean          0.000
 
loop_
 _atom_site_label
 _atom_site_type_symbol
 _atom_site_fract_x
 _atom_site_fract_y
 _atom_site_fract_z
 _atom_site_U_iso_or_equiv
 _atom_site_adp_type
 _atom_site_occupancy
 _atom_site_site_symmetry_order  
 _atom_site_calc_flag
 _atom_site_refinement_flags_posn
 _atom_site_refinement_flags_adp
 _atom_site_refinement_flags_occupancy
 _atom_site_disorder_assembly
 _atom_site_disorder_group
Pt1 Pt 0.41457(2) 0.000000 -0.38241(2) 0.00277(5) Uani 0.0540(7) 2 d S T P . .
Fe1 Fe 0.41457(2) 0.000000 -0.38241(2) 0.00277(5) Uani 0.9460(7) 2 d S T P . .
Fe2 Fe 0.40193(2) -0.500000 -0.37633(2) 0.00264(4) Uani 1 2 d S T P . .
Fe3 Fe 0.59044(2) 0.000000 -0.01170(2) 0.00273(4) Uani 1 2 d S T P . .
Fe4 Fe 0.90249(2) 0.000000 -0.01441(2) 0.00259(4) Uani 1 2 d S T P . .
Fe5 Fe 0.68026(2) -0.20650(2) -0.27794(2) 0.00279(3) Uani 1 1 d . . . . .
Al1 Al 0.43408(4) 0.000000 -0.17377(4) 0.00422(7) Uani 1 2 d S T P . .
Al2 Al 0.67715(4) -0.500000 -0.28138(5) 0.00590(8) Uani 1 2 d S T P . .
Al3 Al 0.26255(4) 0.000000 -0.53530(5) 0.00544(8) Uani 1 2 d S T P . .
Al4 Al 0.57370(4) 0.000000 -0.41945(4) 0.00401(7) Uani 1 2 d S T P . .
Al5 Al 0.74092(4) 0.000000 -0.03842(5) 0.00464(7) Uani 1 2 d S T P . .
Al6 Al 0.47946(3) 0.500000 -0.17080(4) 0.00400(7) Uani 1 2 d S T P . .
Al7 Al 0.500000 -0.500000 -0.500000 0.00298(9) Uani 1 4 d S T P . .
Al8 Al 0.30572(3) 0.500000 -0.22665(4) 0.00407(7) Uani 1 2 d S T P . .
Al9 Al 0.58671(4) 0.000000 -0.21164(4) 0.00342(7) Uani 1 2 d S T P . .
Al10 Al 0.31445(3) 0.21767(5) -0.11075(3) 0.00399(6) Uani 1 1 d . . . . .
Al11 Al 0.63225(2) -0.28789(5) -0.10967(3) 0.00408(6) Uani 1 1 d . . . . .
Al12 Al 0.32178(3) 0.22075(5) -0.33433(3) 0.00427(6) Uani 1 1 d . . . . .
Al13 Al 0.50838(2) -0.26742(5) -0.32981(3) 0.00448(6) Uani 1 1 d . . . . .
Al14 Al 0.63685(2) -0.28123(5) -0.47835(3) 0.00433(6) Uani 1 1 d . . . . .
Al15 Al 0.500000 -0.25051(6) 0.000000 0.00396(7) Uani 1 2 d S T P . .
 
loop_
 _atom_site_aniso_label
 _atom_site_aniso_U_11
 _atom_site_aniso_U_22
 _atom_site_aniso_U_33
 _atom_site_aniso_U_23
 _atom_site_aniso_U_13
 _atom_site_aniso_U_12
Pt1 0.00308(7) 0.00267(8) 0.00267(7) 0.000 0.00103(5) 0.000
Fe1 0.00308(7) 0.00267(8) 0.00267(7) 0.000 0.00103(5) 0.000
Fe2 0.00268(7) 0.00243(7) 0.00260(7) 0.000 0.00049(5) 0.000
Fe3 0.00294(7) 0.00274(7) 0.00251(7) 0.000 0.00080(5) 0.000
Fe4 0.00267(7) 0.00253(7) 0.00250(7) 0.000 0.00068(5) 0.000
Fe5 0.00278(6) 0.00283(6) 0.00268(6) -0.00006(3) 0.00071(4) 0.00004(3)
Al1 0.00444(17) 0.00464(17) 0.00361(16) 0.000 0.00127(13) 0.000
Al2 0.00804(19) 0.00327(17) 0.00627(18) 0.000 0.00201(15) 0.000
Al3 0.00354(17) 0.00400(17) 0.00785(19) 0.000 0.00033(14) 0.000
Al4 0.00487(17) 0.00393(17) 0.00325(16) 0.000 0.00125(14) 0.000
Al5 0.00307(16) 0.00394(17) 0.00711(18) 0.000 0.00185(14) 0.000
Al6 0.00399(16) 0.00464(17) 0.00309(16) 0.000 0.00064(13) 0.000
Al7 0.0033(2) 0.0025(2) 0.0039(2) 0.000 0.00232(18) 0.000
Al8 0.00418(16) 0.00345(17) 0.00442(17) 0.000 0.00108(13) 0.000
Al9 0.00479(17) 0.00277(16) 0.00302(16) 0.000 0.00167(13) 0.000
Al10 0.00399(12) 0.00448(12) 0.00340(12) 0.00042(9) 0.00095(10) 0.00066(9)
Al11 0.00445(12) 0.00437(13) 0.00341(12) 0.00031(9) 0.00120(10) -0.00053(9)
Al12 0.00458(12) 0.00462(12) 0.00387(12) 0.00017(9) 0.00165(10) 0.00076(9)
Al13 0.00440(12) 0.00421(12) 0.00431(12) 0.00010(9) 0.00055(9) -0.00095(9)
Al14 0.00489(12) 0.00448(12) 0.00354(12) -0.00084(9) 0.00117(10) -0.00066(9)
Al15 0.00368(16) 0.00322(17) 0.00487(16) 0.000 0.00114(13) 0.000
 
_geom_special_details
;
 All esds (except the esd in the dihedral angle between two l.s. planes)
 are estimated using the full covariance matrix.  The cell esds are taken
 into account individually in the estimation of esds in distances, angles
 and torsion angles; correlations between esds in cell parameters are only
 used when they are defined by crystal symmetry.  An approximate (isotropic)
 treatment of cell esds is used for estimating esds involving l.s. planes.
;
 
loop_
 _geom_bond_atom_site_label_1
 _geom_bond_atom_site_label_2
 _geom_bond_distance
 _geom_bond_site_symmetry_2
 _geom_bond_publ_flag
Pt1 Al12 2.4726(4) . ?
Pt1 Al12 2.4727(4) 6 ?
Pt1 Al1 2.5241(6) . ?
Pt1 Al4 2.5295(6) 5_654 ?
Pt1 Al3 2.5365(6) . ?
Pt1 Al13 2.5716(4) . ?
Pt1 Al13 2.5717(4) 6 ?
Pt1 Al4 2.6378(6) . ?
Pt1 Al14 2.8204(4) 2_654 ?
Pt1 Al14 2.8204(4) 5_654 ?
Pt1 Al9 2.8585(6) . ?
Fe2 Al3 2.4454(6) 7_544 ?
Fe2 Al13 2.4472(4) . ?
Fe2 Al13 2.4472(4) 6_545 ?
Fe2 Al7 2.4685(2) . ?
Fe2 Al14 2.4688(4) 5_644 ?
Fe2 Al14 2.4688(4) 2_654 ?
Fe2 Al6 2.4757(6) 1_545 ?
Fe2 Al12 2.6987(4) 1_545 ?
Fe2 Al12 2.6987(4) 6 ?
Fe2 Al8 2.7159(6) 1_545 ?
Fe3 Al5 2.4487(6) . ?
Fe3 Al1 2.4526(6) 5_655 ?
Fe3 Al9 2.4741(5) . ?
Fe3 Al15 2.4875(4) 5_655 ?
Fe3 Al15 2.4875(4) . ?
Fe3 Al10 2.4925(4) 2_655 ?
Fe3 Al10 2.4925(4) 5_655 ?
Fe3 Al1 2.6376(6) . ?
Fe3 Al11 2.7901(4) 6 ?
Fe3 Al11 2.7902(4) . ?
Fe3 Fe3 2.8989(4) 5_655 ?
Fe4 Al5 2.4244(6) . ?
Fe4 Al6 2.4692(5) 7_655 ?
Fe4 Al11 2.4725(4) 4_655 ?
Fe4 Al11 2.4725(4) 7_645 ?
Fe4 Al15 2.4890(4) 3 ?
Fe4 Al15 2.4890(4) 7_645 ?
Fe4 Al6 2.5732(6) 3_545 ?
Fe4 Al8 2.6129(6) 3_545 ?
Fe4 Al10 2.7373(4) 3_545 ?
Fe4 Al10 2.7373(4) 8 ?
Fe4 Fe4 2.9265(4) 5_755 ?
Fe5 Al2 2.36918(16) . ?
Fe5 Al14 2.4556(4) . ?
Fe5 Al8 2.4892(4) 3_545 ?
Fe5 Al9 2.5055(4) . ?
Fe5 Al11 2.5145(4) . ?
Fe5 Al10 2.5284(4) 3_545 ?
Fe5 Al12 2.5615(4) 3_545 ?
Fe5 Al13 2.5845(4) . ?
Fe5 Al4 2.6145(4) . ?
Al1 Al9 2.5435(7) . ?
Al1 Al10 2.8296(6) 6 ?
Al1 Al10 2.8296(6) . ?
Al1 Al12 2.8426(6) . ?
Al1 Al12 2.8426(6) 6 ?
Al1 Al15 2.9107(5) 5_655 ?
Al1 Al15 2.9107(5) . ?
Al2 Al14 2.9322(6) 6_545 ?
Al2 Al14 2.9323(6) . ?
Al2 Al11 2.9818(6) . ?
Al2 Al11 2.9818(6) 6_545 ?
Al3 Al14 2.7274(5) 5_654 ?
Al3 Al14 2.7274(5) 2_654 ?
Al3 Al4 2.7561(8) 5_654 ?
Al3 Al8 2.8298(8) 7_554 ?
Al3 Al12 2.8513(5) 4_544 ?
Al3 Al12 2.8513(5) 7_554 ?
Al3 Al14 2.8700(6) 8_445 ?
Al3 Al14 2.8700(6) 3_455 ?
Al3 Al12 2.9813(6) 6 ?
Al4 Al9 2.5351(7) . ?
Al4 Al4 2.5385(11) 5_654 ?
Al4 Al14 2.6604(5) 6 ?
Al4 Al14 2.6604(5) . ?
Al4 Al13 2.7587(5) 6 ?
Al4 Al13 2.7587(5) . ?
Al5 Al9 2.6864(7) . ?
Al5 Al10 2.8141(5) 8 ?
Al5 Al10 2.8141(5) 3_545 ?
Al5 Al8 2.8163(8) 3_545 ?
Al5 Al11 2.8252(6) 4_655 ?
Al5 Al11 2.8252(6) 7_645 ?
Al5 Al11 2.8465(5) 6 ?
Al5 Al11 2.8465(5) . ?
Al5 Al10 2.8705(6) 2_655 ?
Al5 Al10 2.8705(6) 5_655 ?
Al6 Al8 2.5624(7) . ?
Al6 Al11 2.8283(5) 1_565 ?
Al6 Al11 2.8283(5) 6 ?
Al6 Al13 2.8611(5) 6 ?
Al6 Al13 2.8611(5) 1_565 ?
Al6 Al15 2.8761(5) 1_565 ?
Al6 Al15 2.8761(5) 5_655 ?
Al7 Al14 2.7057(4) . ?
Al7 Al14 2.7057(4) 5_644 ?
Al7 Al14 2.7057(4) 6_545 ?
Al7 Al14 2.7057(4) 2_654 ?
Al7 Al13 2.8051(4) 5_644 ?
Al7 Al13 2.8051(4) . ?
Al7 Al13 2.8051(4) 6_545 ?
Al7 Al13 2.8051(4) 2_654 ?
Al8 Al12 2.6725(5) . ?
Al8 Al12 2.6725(5) 6_565 ?
Al8 Al10 2.6788(5) . ?
Al8 Al10 2.6788(5) 6_565 ?
Al9 Al11 2.6389(4) 6 ?
Al9 Al11 2.6389(4) . ?
Al9 Al13 2.6848(5) 6 ?
Al9 Al13 2.6848(5) . ?
Al10 Al11 2.6770(5) 5_655 ?
Al10 Al15 2.7930(4) 5_655 ?
Al10 Al11 2.8219(5) 3_455 ?
Al10 Al12 2.8220(5) . ?
Al11 Al15 2.7996(4) . ?
Al11 Al13 2.8331(5) . ?
Al12 Al14 2.6460(5) 5_654 ?
Al12 Al14 2.8774(5) 3_455 ?
Al12 Al13 2.8936(5) 6 ?
Al13 Al14 2.7399(5) 2_654 ?
 
loop_
 _geom_angle_atom_site_label_1
 _geom_angle_atom_site_label_2
 _geom_angle_atom_site_label_3
 _geom_angle
 _geom_angle_site_symmetry_1
 _geom_angle_site_symmetry_3
 _geom_angle_publ_flag
Al12 Pt1 Al12 92.187(19) . 6 ?
Al12 Pt1 Al1 69.337(13) . . ?
Al12 Pt1 Al1 69.337(13) 6 . ?
Al12 Pt1 Al4 117.086(12) . 5_654 ?
Al12 Pt1 Al4 117.086(12) 6 5_654 ?
Al1 Pt1 Al4 169.55(2) . 5_654 ?
Al12 Pt1 Al3 73.038(13) . . ?
Al12 Pt1 Al3 73.037(13) 6 . ?
Al1 Pt1 Al3 124.535(19) . . ?
Al4 Pt1 Al3 65.919(18) 5_654 . ?
Al12 Pt1 Al13 150.092(14) . . ?
Al12 Pt1 Al13 69.978(12) 6 . ?
Al1 Pt1 Al13 81.714(11) . . ?
Al4 Pt1 Al13 92.669(11) 5_654 . ?
Al3 Pt1 Al13 120.911(10) . . ?
Al12 Pt1 Al13 69.978(12) . 6 ?
Al12 Pt1 Al13 150.092(14) 6 6 ?
Al1 Pt1 Al13 81.714(11) . 6 ?
Al4 Pt1 Al13 92.669(12) 5_654 6 ?
Al3 Pt1 Al13 120.911(9) . 6 ?
Al13 Pt1 Al13 114.107(18) . 6 ?
Al12 Pt1 Al4 133.100(10) . . ?
Al12 Pt1 Al4 133.101(10) 6 . ?
Al1 Pt1 Al4 110.742(17) . . ?
Al4 Pt1 Al4 58.80(2) 5_654 . ?
Al3 Pt1 Al4 124.723(18) . . ?
Al13 Pt1 Al4 63.935(10) . . ?
Al13 Pt1 Al4 63.935(10) 6 . ?
Al12 Pt1 Al14 130.757(14) . 2_654 ?
Al12 Pt1 Al14 59.557(11) 6 2_654 ?
Al1 Pt1 Al14 123.820(9) . 2_654 ?
Al4 Pt1 Al14 59.344(9) 5_654 2_654 ?
Al3 Pt1 Al14 60.941(10) . 2_654 ?
Al13 Pt1 Al14 60.873(11) . 2_654 ?
Al13 Pt1 Al14 149.748(13) 6 2_654 ?
Al4 Pt1 Al14 89.774(11) . 2_654 ?
Al12 Pt1 Al14 59.557(11) . 5_654 ?
Al12 Pt1 Al14 130.756(14) 6 5_654 ?
Al1 Pt1 Al14 123.820(9) . 5_654 ?
Al4 Pt1 Al14 59.344(9) 5_654 5_654 ?
Al3 Pt1 Al14 60.941(10) . 5_654 ?
Al13 Pt1 Al14 149.748(13) . 5_654 ?
Al13 Pt1 Al14 60.874(11) 6 5_654 ?
Al4 Pt1 Al14 89.774(11) . 5_654 ?
Al14 Pt1 Al14 107.161(16) 2_654 5_654 ?
Al12 Pt1 Al9 107.303(12) . . ?
Al12 Pt1 Al9 107.305(12) 6 . ?
Al1 Pt1 Al9 55.985(15) . . ?
Al4 Pt1 Al9 113.562(17) 5_654 . ?
Al3 Pt1 Al9 179.481(17) . . ?
Al13 Pt1 Al9 58.983(9) . . ?
Al13 Pt1 Al9 58.982(9) 6 . ?
Al4 Pt1 Al9 54.758(16) . . ?
Al14 Pt1 Al9 118.855(10) 2_654 . ?
Al14 Pt1 Al9 118.855(10) 5_654 . ?
Al3 Fe2 Al13 129.747(10) 7_544 . ?
Al3 Fe2 Al13 129.748(10) 7_544 6_545 ?
Al13 Fe2 Al13 100.17(2) . 6_545 ?
Al3 Fe2 Al7 118.110(16) 7_544 . ?
Al13 Fe2 Al7 69.589(10) . . ?
Al13 Fe2 Al7 69.588(10) 6_545 . ?
Al3 Fe2 Al14 71.467(14) 7_544 5_644 ?
Al13 Fe2 Al14 135.907(15) . 5_644 ?
Al13 Fe2 Al14 67.743(13) 6_545 5_644 ?
Al7 Fe2 Al14 66.462(10) . 5_644 ?
Al3 Fe2 Al14 71.467(14) 7_544 2_654 ?
Al13 Fe2 Al14 67.742(13) . 2_654 ?
Al13 Fe2 Al14 135.906(15) 6_545 2_654 ?
Al7 Fe2 Al14 66.462(10) . 2_654 ?
Al14 Fe2 Al14 91.307(19) 5_644 2_654 ?
Al3 Fe2 Al6 125.19(2) 7_544 1_545 ?
Al13 Fe2 Al6 71.067(12) . 1_545 ?
Al13 Fe2 Al6 71.066(12) 6_545 1_545 ?
Al7 Fe2 Al6 116.701(14) . 1_545 ?
Al14 Fe2 Al6 133.785(10) 5_644 1_545 ?
Al14 Fe2 Al6 133.785(10) 2_654 1_545 ?
Al3 Fe2 Al12 67.115(11) 7_544 1_545 ?
Al13 Fe2 Al12 155.518(15) . 1_545 ?
Al13 Fe2 Al12 68.231(12) 6_545 1_545 ?
Al7 Fe2 Al12 121.767(9) . 1_545 ?
Al14 Fe2 Al12 61.411(12) 5_644 1_545 ?
Al14 Fe2 Al12 135.711(15) 2_654 1_545 ?
Al6 Fe2 Al12 84.611(11) 1_545 1_545 ?
Al3 Fe2 Al12 67.115(11) 7_544 6 ?
Al13 Fe2 Al12 68.231(12) . 6 ?
Al13 Fe2 Al12 155.518(15) 6_545 6 ?
Al7 Fe2 Al12 121.767(9) . 6 ?
Al14 Fe2 Al12 135.711(15) 5_644 6 ?
Al14 Fe2 Al12 61.411(12) 2_654 6 ?
Al6 Fe2 Al12 84.611(11) 1_545 6 ?
Al12 Fe2 Al12 113.245(17) 1_545 6 ?
Al3 Fe2 Al8 66.255(18) 7_544 1_545 ?
Al13 Fe2 Al8 107.864(12) . 1_545 ?
Al13 Fe2 Al8 107.864(12) 6_545 1_545 ?
Al7 Fe2 Al8 175.635(14) . 1_545 ?
Al14 Fe2 Al8 116.222(12) 5_644 1_545 ?
Al14 Fe2 Al8 116.222(12) 2_654 1_545 ?
Al6 Fe2 Al8 58.934(16) 1_545 1_545 ?
Al12 Fe2 Al8 59.150(9) 1_545 1_545 ?
Al12 Fe2 Al8 59.150(9) 6 1_545 ?
Al5 Fe3 Al1 123.60(2) . 5_655 ?
Al5 Fe3 Al9 66.144(19) . . ?
Al1 Fe3 Al9 170.25(2) 5_655 . ?
Al5 Fe3 Al15 125.617(8) . 5_655 ?
Al1 Fe3 Al15 72.194(9) 5_655 5_655 ?
Al9 Fe3 Al15 102.558(9) . 5_655 ?
Al5 Fe3 Al15 125.616(8) . . ?
Al1 Fe3 Al15 72.194(9) 5_655 . ?
Al9 Fe3 Al15 102.558(9) . . ?
Al15 Fe3 Al15 108.719(16) 5_655 . ?
Al5 Fe3 Al10 71.026(13) . 2_655 ?
Al1 Fe3 Al10 69.802(13) 5_655 2_655 ?
Al9 Fe3 Al10 116.436(13) . 2_655 ?
Al15 Fe3 Al10 68.228(10) 5_655 2_655 ?
Al15 Fe3 Al10 140.766(12) . 2_655 ?
Al5 Fe3 Al10 71.026(13) . 5_655 ?
Al1 Fe3 Al10 69.802(13) 5_655 5_655 ?
Al9 Fe3 Al10 116.436(13) . 5_655 ?
Al15 Fe3 Al10 140.766(12) 5_655 5_655 ?
Al15 Fe3 Al10 68.228(10) . 5_655 ?
Al10 Fe3 Al10 89.618(19) 2_655 5_655 ?
Al5 Fe3 Al1 125.722(19) . . ?
Al1 Fe3 Al1 110.676(16) 5_655 . ?
Al9 Fe3 Al1 59.579(17) . . ?
Al15 Fe3 Al1 69.140(8) 5_655 . ?
Al15 Fe3 Al1 69.140(8) . . ?
Al10 Fe3 Al1 134.569(10) 2_655 . ?
Al10 Fe3 Al1 134.569(10) 5_655 . ?
Al5 Fe3 Al11 65.446(10) . 6 ?
Al1 Fe3 Al11 122.334(9) 5_655 6 ?
Al9 Fe3 Al11 59.812(9) . 6 ?
Al15 Fe3 Al11 63.772(10) 5_655 6 ?
Al15 Fe3 Al11 155.707(12) . 6 ?
Al10 Fe3 Al11 60.586(12) 2_655 6 ?
Al10 Fe3 Al11 133.041(15) 5_655 6 ?
Al1 Fe3 Al11 86.873(11) . 6 ?
Al5 Fe3 Al11 65.447(10) . . ?
Al1 Fe3 Al11 122.334(9) 5_655 . ?
Al9 Fe3 Al11 59.812(9) . . ?
Al15 Fe3 Al11 155.706(12) 5_655 . ?
Al15 Fe3 Al11 63.771(10) . . ?
Al10 Fe3 Al11 133.042(15) 2_655 . ?
Al10 Fe3 Al11 60.587(12) 5_655 . ?
Al1 Fe3 Al11 86.872(11) . . ?
Al11 Fe3 Al11 112.747(17) 6 . ?
Al5 Fe3 Fe3 178.054(18) . 5_655 ?
Al1 Fe3 Fe3 58.345(14) 5_655 5_655 ?
Al9 Fe3 Fe3 111.910(17) . 5_655 ?
Al15 Fe3 Fe3 54.360(8) 5_655 5_655 ?
Al15 Fe3 Fe3 54.360(8) . 5_655 ?
Al10 Fe3 Fe3 110.265(12) 2_655 5_655 ?
Al10 Fe3 Fe3 110.265(12) 5_655 5_655 ?
Al1 Fe3 Fe3 52.331(13) . 5_655 ?
Al11 Fe3 Fe3 113.759(10) 6 5_655 ?
Al11 Fe3 Fe3 113.758(10) . 5_655 ?
Al5 Fe4 Al6 123.84(2) . 7_655 ?
Al5 Fe4 Al11 70.463(14) . 4_655 ?
Al6 Fe4 Al11 69.828(13) 7_655 4_655 ?
Al5 Fe4 Al11 70.463(13) . 7_645 ?
Al6 Fe4 Al11 69.828(13) 7_655 7_645 ?
Al11 Fe4 Al11 87.631(19) 4_655 7_645 ?
Al5 Fe4 Al15 126.007(8) . 3 ?
Al6 Fe4 Al15 70.910(9) 7_655 3 ?
Al11 Fe4 Al15 68.703(10) 4_655 3 ?
Al11 Fe4 Al15 139.193(13) 7_645 3 ?
Al5 Fe4 Al15 126.007(8) . 7_645 ?
Al6 Fe4 Al15 70.910(9) 7_655 7_645 ?
Al11 Fe4 Al15 139.193(13) 4_655 7_645 ?
Al11 Fe4 Al15 68.703(10) 7_645 7_645 ?
Al15 Fe4 Al15 107.985(16) 3 7_645 ?
Al5 Fe4 Al6 127.080(19) . 3_545 ?
Al6 Fe4 Al6 109.080(16) 7_655 3_545 ?
Al11 Fe4 Al6 135.377(10) 4_655 3_545 ?
Al11 Fe4 Al6 135.377(10) 7_645 3_545 ?
Al15 Fe4 Al6 69.220(8) 3 3_545 ?
Al15 Fe4 Al6 69.220(8) 7_645 3_545 ?
Al5 Fe4 Al8 67.867(18) . 3_545 ?
Al6 Fe4 Al8 168.293(19) 7_655 3_545 ?
Al11 Fe4 Al8 117.793(13) 4_655 3_545 ?
Al11 Fe4 Al8 117.793(13) 7_645 3_545 ?
Al15 Fe4 Al8 102.775(9) 3 3_545 ?
Al15 Fe4 Al8 102.775(9) 7_645 3_545 ?
Al6 Fe4 Al8 59.213(16) 3_545 3_545 ?
Al5 Fe4 Al10 65.750(10) . 3_545 ?
Al6 Fe4 Al10 122.532(9) 7_655 3_545 ?
Al11 Fe4 Al10 132.598(15) 4_655 3_545 ?
Al11 Fe4 Al10 61.593(12) 7_645 3_545 ?
Al15 Fe4 Al10 156.157(12) 3 3_545 ?
Al15 Fe4 Al10 64.403(10) 7_645 3_545 ?
Al6 Fe4 Al10 87.179(11) 3_545 3_545 ?
Al8 Fe4 Al10 60.039(9) 3_545 3_545 ?
Al5 Fe4 Al10 65.750(10) . 8 ?
Al6 Fe4 Al10 122.532(9) 7_655 8 ?
Al11 Fe4 Al10 61.593(12) 4_655 8 ?
Al11 Fe4 Al10 132.598(15) 7_645 8 ?
Al15 Fe4 Al10 64.403(10) 3 8 ?
Al15 Fe4 Al10 156.157(12) 7_645 8 ?
Al6 Fe4 Al10 87.179(11) 3_545 8 ?
Al8 Fe4 Al10 60.039(9) 3_545 8 ?
Al10 Fe4 Al10 112.689(17) 3_545 8 ?
Al5 Fe4 Fe4 179.962(18) . 5_755 ?
Al6 Fe4 Fe4 56.198(14) 7_655 5_755 ?
Al11 Fe4 Fe4 109.563(12) 4_655 5_755 ?
Al11 Fe4 Fe4 109.563(12) 7_645 5_755 ?
Al15 Fe4 Fe4 53.993(8) 3 5_755 ?
Al15 Fe4 Fe4 53.993(8) 7_645 5_755 ?
Al6 Fe4 Fe4 52.882(13) 3_545 5_755 ?
Al8 Fe4 Fe4 112.095(15) 3_545 5_755 ?
Al10 Fe4 Fe4 114.234(10) 3_545 5_755 ?
Al10 Fe4 Fe4 114.234(10) 8 5_755 ?
Al2 Fe5 Al14 74.829(17) . . ?
Al2 Fe5 Al8 133.150(17) . 3_545 ?
Al14 Fe5 Al8 112.110(16) . 3_545 ?
Al2 Fe5 Al9 131.325(17) . . ?
Al14 Fe5 Al9 119.449(16) . . ?
Al8 Fe5 Al9 87.313(14) 3_545 . ?
Al2 Fe5 Al11 75.194(17) . . ?
Al14 Fe5 Al11 136.453(15) . . ?
Al8 Fe5 Al11 111.430(16) 3_545 . ?
Al9 Fe5 Al11 63.427(13) . . ?
Al2 Fe5 Al10 77.290(17) . 3_545 ?
Al14 Fe5 Al10 132.890(15) . 3_545 ?
Al8 Fe5 Al10 64.532(14) 3_545 3_545 ?
Al9 Fe5 Al10 107.517(16) . 3_545 ?
Al11 Fe5 Al10 68.054(13) . 3_545 ?
Al2 Fe5 Al12 77.304(17) . 3_545 ?
Al14 Fe5 Al12 69.955(13) . 3_545 ?
Al8 Fe5 Al12 63.875(14) 3_545 3_545 ?
Al9 Fe5 Al12 150.431(15) . 3_545 ?
Al11 Fe5 Al12 131.453(14) . 3_545 ?
Al10 Fe5 Al12 67.340(13) 3_545 3_545 ?
Al2 Fe5 Al13 77.974(17) . . ?
Al14 Fe5 Al13 75.897(13) . . ?
Al8 Fe5 Al13 148.609(13) 3_545 . ?
Al9 Fe5 Al13 63.647(14) . . ?
Al11 Fe5 Al13 67.491(12) . . ?
Al10 Fe5 Al13 133.177(14) 3_545 . ?
Al12 Fe5 Al13 141.920(14) 3_545 . ?
Al2 Fe5 Al4 128.307(17) . . ?
Al14 Fe5 Al4 63.209(13) . . ?
Al8 Fe5 Al4 91.646(13) 3_545 . ?
Al9 Fe5 Al4 59.313(16) . . ?
Al11 Fe5 Al4 116.328(15) . . ?
Al10 Fe5 Al4 154.314(14) 3_545 . ?
Al12 Fe5 Al4 112.150(16) 3_545 . ?
Al13 Fe5 Al4 64.092(14) . . ?
Fe3 Al1 Pt1 164.99(3) 5_655 . ?
Fe3 Al1 Al9 126.34(3) 5_655 . ?
Pt1 Al1 Al9 68.673(19) . . ?
Fe3 Al1 Fe3 69.322(16) 5_655 . ?
Pt1 Al1 Fe3 125.69(2) . . ?
Al9 Al1 Fe3 57.014(17) . . ?
Fe3 Al1 Al10 55.762(13) 5_655 6 ?
Pt1 Al1 Al10 113.706(17) . 6 ?
Al9 Al1 Al10 140.639(11) . 6 ?
Fe3 Al1 Al10 108.186(17) . 6 ?
Fe3 Al1 Al10 55.761(13) 5_655 . ?
Pt1 Al1 Al10 113.707(17) . . ?
Al9 Al1 Al10 140.639(11) . . ?
Fe3 Al1 Al10 108.186(17) . . ?
Al10 Al1 Al10 76.75(2) 6 . ?
Fe3 Al1 Al12 115.258(17) 5_655 . ?
Pt1 Al1 Al12 54.478(12) . . ?
Al9 Al1 Al12 105.809(19) . . ?
Fe3 Al1 Al12 139.527(12) . . ?
Al10 Al1 Al12 105.85(2) 6 . ?
Al10 Al1 Al12 59.671(13) . . ?
Fe3 Al1 Al12 115.258(17) 5_655 6 ?
Pt1 Al1 Al12 54.478(12) . 6 ?
Al9 Al1 Al12 105.809(19) . 6 ?
Fe3 Al1 Al12 139.528(12) . 6 ?
Al10 Al1 Al12 59.671(13) 6 6 ?
Al10 Al1 Al12 105.85(2) . 6 ?
Al12 Al1 Al12 77.61(2) . 6 ?
Fe3 Al1 Al15 54.457(11) 5_655 5_655 ?
Pt1 Al1 Al15 132.164(12) . 5_655 ?
Al9 Al1 Al15 90.171(16) . 5_655 ?
Fe3 Al1 Al15 52.997(10) . 5_655 ?
Al10 Al1 Al15 109.604(19) 6 5_655 ?
Al10 Al1 Al15 58.210(10) . 5_655 ?
Al12 Al1 Al15 95.116(11) . 5_655 ?
Al12 Al1 Al15 163.68(2) 6 5_655 ?
Fe3 Al1 Al15 54.457(11) 5_655 . ?
Pt1 Al1 Al15 132.164(12) . . ?
Al9 Al1 Al15 90.171(16) . . ?
Fe3 Al1 Al15 52.998(10) . . ?
Al10 Al1 Al15 58.210(11) 6 . ?
Al10 Al1 Al15 109.604(19) . . ?
Al12 Al1 Al15 163.68(2) . . ?
Al12 Al1 Al15 95.116(11) 6 . ?
Al15 Al1 Al15 87.98(2) 5_655 . ?
Fe5 Al2 Fe5 177.40(3) 6_545 . ?
Fe5 Al2 Al14 53.926(11) 6_545 6_545 ?
Fe5 Al2 Al14 127.96(2) . 6_545 ?
Fe5 Al2 Al14 127.96(2) 6_545 . ?
Fe5 Al2 Al14 53.927(11) . . ?
Al14 Al2 Al14 74.04(2) 6_545 . ?
Fe5 Al2 Al11 124.67(2) 6_545 . ?
Fe5 Al2 Al11 54.616(11) . . ?
Al14 Al2 Al11 155.43(2) 6_545 . ?
Al14 Al2 Al11 102.600(12) . . ?
Fe5 Al2 Al11 54.617(11) 6_545 6_545 ?
Fe5 Al2 Al11 124.67(2) . 6_545 ?
Al14 Al2 Al11 102.600(12) 6_545 6_545 ?
Al14 Al2 Al11 155.43(2) . 6_545 ?
Al11 Al2 Al11 70.071(19) . 6_545 ?
Fe2 Al3 Pt1 159.72(3) 7_544 . ?
Fe2 Al3 Al14 121.573(13) 7_544 5_654 ?
Pt1 Al3 Al14 64.676(13) . 5_654 ?
Fe2 Al3 Al14 121.573(13) 7_544 2_654 ?
Pt1 Al3 Al14 64.676(13) . 2_654 ?
Al14 Al3 Al14 112.63(2) 5_654 2_654 ?
Fe2 Al3 Al4 143.36(3) 7_544 5_654 ?
Pt1 Al3 Al4 56.918(16) . 5_654 ?
Al14 Al3 Al4 58.043(13) 5_654 5_654 ?
Al14 Al3 Al4 58.043(13) 2_654 5_654 ?
Fe2 Al3 Al8 61.464(17) 7_544 7_554 ?
Pt1 Al3 Al8 138.82(2) . 7_554 ?
Al14 Al3 Al8 95.132(17) 5_654 7_554 ?
Al14 Al3 Al8 95.132(17) 2_654 7_554 ?
Al4 Al3 Al8 81.90(2) 5_654 7_554 ?
Fe2 Al3 Al12 60.688(13) 7_544 4_544 ?
Pt1 Al3 Al12 125.936(12) . 4_544 ?
Al14 Al3 Al12 147.85(2) 5_654 4_544 ?
Al14 Al3 Al12 62.050(12) 2_654 4_544 ?
Al4 Al3 Al12 99.966(17) 5_654 4_544 ?
Al8 Al3 Al12 56.121(12) 7_554 4_544 ?
Fe2 Al3 Al12 60.688(13) 7_544 7_554 ?
Pt1 Al3 Al12 125.936(12) . 7_554 ?
Al14 Al3 Al12 62.050(12) 5_654 7_554 ?
Al14 Al3 Al12 147.85(2) 2_654 7_554 ?
Al4 Al3 Al12 99.966(17) 5_654 7_554 ?
Al8 Al3 Al12 56.121(12) 7_554 7_554 ?
Al12 Al3 Al12 104.44(2) 4_544 7_554 ?
Fe2 Al3 Al14 54.646(13) 7_544 8_445 ?
Pt1 Al3 Al14 110.924(18) . 8_445 ?
Al14 Al3 Al14 155.89(2) 5_654 8_445 ?
Al14 Al3 Al14 83.628(12) 2_654 8_445 ?
Al4 Al3 Al14 141.617(10) 5_654 8_445 ?
Al8 Al3 Al14 101.189(18) 7_554 8_445 ?
Al12 Al3 Al14 55.094(12) 4_544 8_445 ?
Al12 Al3 Al14 113.59(2) 7_554 8_445 ?
Fe2 Al3 Al14 54.646(13) 7_544 3_455 ?
Pt1 Al3 Al14 110.924(18) . 3_455 ?
Al14 Al3 Al14 83.628(12) 5_654 3_455 ?
Al14 Al3 Al14 155.89(2) 2_654 3_455 ?
Al4 Al3 Al14 141.617(10) 5_654 3_455 ?
Al8 Al3 Al14 101.189(18) 7_554 3_455 ?
Al12 Al3 Al14 113.59(2) 4_544 3_455 ?
Al12 Al3 Al14 55.094(12) 7_554 3_455 ?
Al14 Al3 Al14 75.93(2) 8_445 3_455 ?
Fe2 Al3 Al12 112.967(18) 7_544 6 ?
Pt1 Al3 Al12 52.496(12) . 6 ?
Al14 Al3 Al12 114.90(2) 5_654 6 ?
Al14 Al3 Al12 55.010(12) 2_654 6 ?
Al4 Al3 Al12 96.021(18) 5_654 6 ?
Al8 Al3 Al12 143.301(10) 7_554 6 ?
Al12 Al3 Al12 88.667(11) 4_544 6 ?
Al12 Al3 Al12 157.12(2) 7_554 6 ?
Al14 Al3 Al12 58.874(13) 8_445 6 ?
Al14 Al3 Al12 102.61(2) 3_455 6 ?
Pt1 Al4 Al9 171.75(3) 5_654 . ?
Pt1 Al4 Al4 62.73(2) 5_654 5_654 ?
Al9 Al4 Al4 125.52(3) . 5_654 ?
Pt1 Al4 Fe5 116.153(16) 5_654 . ?
Al9 Al4 Fe5 58.204(13) . . ?
Al4 Al4 Fe5 139.793(10) 5_654 . ?
Pt1 Al4 Fe5 116.152(16) 5_654 6 ?
Al9 Al4 Fe5 58.205(14) . 6 ?
Al4 Al4 Fe5 139.793(10) 5_654 6 ?
Fe5 Al4 Fe5 79.198(16) . 6 ?
Pt1 Al4 Pt1 121.20(2) 5_654 . ?
Al9 Al4 Pt1 67.054(18) . . ?
Al4 Al4 Pt1 58.47(2) 5_654 . ?
Fe5 Al4 Pt1 108.199(16) . . ?
Fe5 Al4 Pt1 108.199(16) 6 . ?
Pt1 Al4 Al14 65.779(13) 5_654 6 ?
Al9 Al4 Al14 111.085(15) . 6 ?
Al4 Al4 Al14 95.658(18) 5_654 6 ?
Fe5 Al4 Al14 121.39(2) . 6 ?
Fe5 Al4 Al14 55.479(11) 6 6 ?
Pt1 Al4 Al14 119.228(13) . 6 ?
Pt1 Al4 Al14 65.778(13) 5_654 . ?
Al9 Al4 Al14 111.086(15) . . ?
Al4 Al4 Al14 95.657(18) 5_654 . ?
Fe5 Al4 Al14 55.481(11) . . ?
Fe5 Al4 Al14 121.39(2) 6 . ?
Pt1 Al4 Al14 119.228(13) . . ?
Al14 Al4 Al14 117.10(3) 6 . ?
Pt1 Al4 Al3 57.162(16) 5_654 5_654 ?
Al9 Al4 Al3 114.59(2) . 5_654 ?
Al4 Al4 Al3 119.89(3) 5_654 5_654 ?
Fe5 Al4 Al3 73.022(15) . 5_654 ?
Fe5 Al4 Al3 73.021(15) 6 5_654 ?
Pt1 Al4 Al3 178.36(2) . 5_654 ?
Al14 Al4 Al3 60.438(13) 6 5_654 ?
Al14 Al4 Al3 60.438(13) . 5_654 ?
Pt1 Al4 Al13 122.594(14) 5_654 6 ?
Al9 Al4 Al13 60.776(13) . 6 ?
Al4 Al4 Al13 88.21(2) 5_654 6 ?
Fe5 Al4 Al13 117.32(2) . 6 ?
Fe5 Al4 Al13 57.426(11) 6 6 ?
Pt1 Al4 Al13 56.867(12) . 6 ?
Al14 Al4 Al13 69.787(11) 6 6 ?
Al14 Al4 Al13 171.57(2) . 6 ?
Al3 Al4 Al13 123.705(14) 5_654 6 ?
Pt1 Al4 Al13 122.594(14) 5_654 . ?
Al9 Al4 Al13 60.776(13) . . ?
Al4 Al4 Al13 88.21(2) 5_654 . ?
Fe5 Al4 Al13 57.426(11) . . ?
Fe5 Al4 Al13 117.32(2) 6 . ?
Pt1 Al4 Al13 56.867(12) . . ?
Al14 Al4 Al13 171.57(2) 6 . ?
Al14 Al4 Al13 69.788(11) . . ?
Al3 Al4 Al13 123.705(14) 5_654 . ?
Al13 Al4 Al13 102.94(2) 6 . ?
Fe4 Al5 Fe3 165.81(3) . . ?
Fe4 Al5 Al9 136.81(3) . . ?
Fe3 Al5 Al9 57.383(16) . . ?
Fe4 Al5 Al10 62.483(13) . 8 ?
Fe3 Al5 Al10 122.456(13) . 8 ?
Al9 Al5 Al10 95.114(17) . 8 ?
Fe4 Al5 Al10 62.483(13) . 3_545 ?
Fe3 Al5 Al10 122.456(13) . 3_545 ?
Al9 Al5 Al10 95.114(17) . 3_545 ?
Al10 Al5 Al10 108.13(2) 8 3_545 ?
Fe4 Al5 Al8 59.250(16) . 3_545 ?
Fe3 Al5 Al8 134.94(2) . 3_545 ?
Al9 Al5 Al8 77.56(2) . 3_545 ?
Al10 Al5 Al8 56.820(12) 8 3_545 ?
Al10 Al5 Al8 56.820(12) 3_545 3_545 ?
Fe4 Al5 Al11 55.565(13) . 4_655 ?
Fe3 Al5 Al11 114.268(18) . 4_655 ?
Al9 Al5 Al11 142.680(10) . 4_655 ?
Al10 Al5 Al11 56.681(12) 8 4_655 ?
Al10 Al5 Al11 115.59(2) 3_545 4_655 ?
Al8 Al5 Al11 101.057(18) 3_545 4_655 ?
Fe4 Al5 Al11 55.565(13) . 7_645 ?
Fe3 Al5 Al11 114.268(18) . 7_645 ?
Al9 Al5 Al11 142.680(10) . 7_645 ?
Al10 Al5 Al11 115.59(2) 8 7_645 ?
Al10 Al5 Al11 56.681(12) 3_545 7_645 ?
Al8 Al5 Al11 101.057(18) 3_545 7_645 ?
Al11 Al5 Al11 74.59(2) 4_655 7_645 ?
Fe4 Al5 Al11 121.807(13) . 6 ?
Fe3 Al5 Al11 63.069(12) . 6 ?
Al9 Al5 Al11 56.884(12) . 6 ?
Al10 Al5 Al11 59.800(12) 8 6 ?
Al10 Al5 Al11 144.95(2) 3_545 6 ?
Al8 Al5 Al11 93.784(16) 3_545 6 ?
Al11 Al5 Al11 86.331(12) 4_655 6 ?
Al11 Al5 Al11 157.68(2) 7_645 6 ?
Fe4 Al5 Al11 121.807(13) . . ?
Fe3 Al5 Al11 63.069(12) . . ?
Al9 Al5 Al11 56.883(12) . . ?
Al10 Al5 Al11 144.95(2) 8 . ?
Al10 Al5 Al11 59.801(12) 3_545 . ?
Al8 Al5 Al11 93.784(16) 3_545 . ?
Al11 Al5 Al11 157.68(2) 4_655 . ?
Al11 Al5 Al11 86.332(11) 7_645 . ?
Al11 Al5 Al11 109.41(2) 6 . ?
Fe4 Al5 Al10 114.775(18) . 2_655 ?
Fe3 Al5 Al10 55.199(13) . 2_655 ?
Al9 Al5 Al10 98.833(18) . 2_655 ?
Al10 Al5 Al10 86.613(11) 8 2_655 ?
Al10 Al5 Al10 158.72(2) 3_545 2_655 ?
Al8 Al5 Al10 142.253(10) 3_545 2_655 ?
Al11 Al5 Al10 59.392(13) 4_655 2_655 ?
Al11 Al5 Al10 103.44(2) 7_645 2_655 ?
Al11 Al5 Al10 55.841(12) 6 2_655 ?
Al11 Al5 Al10 115.94(2) . 2_655 ?
Fe4 Al5 Al10 114.775(18) . 5_655 ?
Fe3 Al5 Al10 55.199(12) . 5_655 ?
Al9 Al5 Al10 98.833(18) . 5_655 ?
Al10 Al5 Al10 158.72(2) 8 5_655 ?
Al10 Al5 Al10 86.613(12) 3_545 5_655 ?
Al8 Al5 Al10 142.253(10) 3_545 5_655 ?
Al11 Al5 Al10 103.44(2) 4_655 5_655 ?
Al11 Al5 Al10 59.392(13) 7_645 5_655 ?
Al11 Al5 Al10 115.94(2) 6 5_655 ?
Al11 Al5 Al10 55.841(12) . 5_655 ?
Al10 Al5 Al10 75.46(2) 2_655 5_655 ?
Fe4 Al6 Fe2 162.70(2) 7_655 1_565 ?
Fe4 Al6 Al8 132.08(3) 7_655 . ?
Fe2 Al6 Al8 65.215(18) 1_565 . ?
Fe4 Al6 Fe4 70.919(16) 7_655 3_455 ?
Fe2 Al6 Fe4 126.38(2) 1_565 3_455 ?
Al8 Al6 Fe4 61.164(17) . 3_455 ?
Fe4 Al6 Al11 55.142(13) 7_655 1_565 ?
Fe2 Al6 Al11 112.392(18) 1_565 1_565 ?
Al8 Al6 Al11 142.588(10) . 1_565 ?
Fe4 Al6 Al11 109.683(18) 3_455 1_565 ?
Fe4 Al6 Al11 55.142(13) 7_655 6 ?
Fe2 Al6 Al11 112.392(18) 1_565 6 ?
Al8 Al6 Al11 142.588(10) . 6 ?
Fe4 Al6 Al11 109.683(18) 3_455 6 ?
Al11 Al6 Al11 74.49(2) 1_565 6 ?
Fe4 Al6 Al13 114.858(16) 7_655 6 ?
Fe2 Al6 Al13 54.004(12) 1_565 6 ?
Al8 Al6 Al13 100.574(19) . 6 ?
Fe4 Al6 Al13 136.871(12) 3_455 6 ?
Al11 Al6 Al13 106.86(2) 1_565 6 ?
Al11 Al6 Al13 59.726(13) 6 6 ?
Fe4 Al6 Al13 114.858(16) 7_655 1_565 ?
Fe2 Al6 Al13 54.004(12) 1_565 1_565 ?
Al8 Al6 Al13 100.574(19) . 1_565 ?
Fe4 Al6 Al13 136.871(12) 3_455 1_565 ?
Al11 Al6 Al13 59.726(13) 1_565 1_565 ?
Al11 Al6 Al13 106.86(2) 6 1_565 ?
Al13 Al6 Al13 81.99(2) 6 1_565 ?
Fe4 Al6 Al15 54.866(11) 7_655 1_565 ?
Fe2 Al6 Al15 132.467(12) 1_565 1_565 ?
Al8 Al6 Al15 94.125(16) . 1_565 ?
Fe4 Al6 Al15 54.008(10) 3_455 1_565 ?
Al11 Al6 Al15 58.777(11) 1_565 1_565 ?
Al11 Al6 Al15 109.210(19) 6 1_565 ?
Al13 Al6 Al15 165.05(2) 6 1_565 ?
Al13 Al6 Al15 92.732(11) 1_565 1_565 ?
Fe4 Al6 Al15 54.866(10) 7_655 5_655 ?
Fe2 Al6 Al15 132.467(12) 1_565 5_655 ?
Al8 Al6 Al15 94.125(16) . 5_655 ?
Fe4 Al6 Al15 54.008(10) 3_455 5_655 ?
Al11 Al6 Al15 109.210(19) 1_565 5_655 ?
Al11 Al6 Al15 58.777(11) 6 5_655 ?
Al13 Al6 Al15 92.732(11) 6 5_655 ?
Al13 Al6 Al15 165.05(2) 1_565 5_655 ?
Al15 Al6 Al15 88.86(2) 1_565 5_655 ?
Fe2 Al7 Fe2 180.0 . 5_644 ?
Fe2 Al7 Al14 123.225(9) . . ?
Fe2 Al7 Al14 56.775(9) 5_644 . ?
Fe2 Al7 Al14 56.775(9) . 5_644 ?
Fe2 Al7 Al14 123.224(9) 5_644 5_644 ?
Al14 Al7 Al14 179.999(11) . 5_644 ?
Fe2 Al7 Al14 123.225(9) . 6_545 ?
Fe2 Al7 Al14 56.776(9) 5_644 6_545 ?
Al14 Al7 Al14 81.463(16) . 6_545 ?
Al14 Al7 Al14 98.537(16) 5_644 6_545 ?
Fe2 Al7 Al14 56.775(9) . 2_654 ?
Fe2 Al7 Al14 123.224(9) 5_644 2_654 ?
Al14 Al7 Al14 98.537(16) . 2_654 ?
Al14 Al7 Al14 81.463(16) 5_644 2_654 ?
Al14 Al7 Al14 180.0 6_545 2_654 ?
Fe2 Al7 Al13 125.150(8) . 5_644 ?
Fe2 Al7 Al13 54.850(8) 5_644 5_644 ?
Al14 Al7 Al13 111.539(11) . 5_644 ?
Al14 Al7 Al13 68.461(11) 5_644 5_644 ?
Al14 Al7 Al13 59.596(11) 6_545 5_644 ?
Al14 Al7 Al13 120.404(11) 2_654 5_644 ?
Fe2 Al7 Al13 54.849(8) . . ?
Fe2 Al7 Al13 125.151(8) 5_644 . ?
Al14 Al7 Al13 68.462(11) . . ?
Al14 Al7 Al13 111.539(11) 5_644 . ?
Al14 Al7 Al13 120.404(11) 6_545 . ?
Al14 Al7 Al13 59.596(11) 2_654 . ?
Al13 Al7 Al13 179.999(11) 5_644 . ?
Fe2 Al7 Al13 54.850(8) . 6_545 ?
Fe2 Al7 Al13 125.150(8) 5_644 6_545 ?
Al14 Al7 Al13 120.405(11) . 6_545 ?
Al14 Al7 Al13 59.596(11) 5_644 6_545 ?
Al14 Al7 Al13 68.461(11) 6_545 6_545 ?
Al14 Al7 Al13 111.539(11) 2_654 6_545 ?
Al13 Al7 Al13 96.000(15) 5_644 6_545 ?
Al13 Al7 Al13 84.000(15) . 6_545 ?
Fe2 Al7 Al13 125.150(8) . 2_654 ?
Fe2 Al7 Al13 54.850(8) 5_644 2_654 ?
Al14 Al7 Al13 59.595(11) . 2_654 ?
Al14 Al7 Al13 120.404(11) 5_644 2_654 ?
Al14 Al7 Al13 111.539(11) 6_545 2_654 ?
Al14 Al7 Al13 68.461(11) 2_654 2_654 ?
Al13 Al7 Al13 84.000(15) 5_644 2_654 ?
Al13 Al7 Al13 96.000(15) . 2_654 ?
Al13 Al7 Al13 180.0 6_545 2_654 ?
Fe5 Al8 Fe5 84.055(17) 3_455 8_455 ?
Fe5 Al8 Al6 137.800(9) 3_455 . ?
Fe5 Al8 Al6 137.800(9) 8_455 . ?
Fe5 Al8 Fe4 114.952(16) 3_455 3_455 ?
Fe5 Al8 Fe4 114.952(16) 8_455 3_455 ?
Al6 Al8 Fe4 59.621(17) . 3_455 ?
Fe5 Al8 Al12 59.377(11) 3_455 . ?
Fe5 Al8 Al12 128.29(2) 8_455 . ?
Al6 Al8 Al12 83.495(16) . . ?
Fe4 Al8 Al12 113.329(14) 3_455 . ?
Fe5 Al8 Al12 128.29(2) 3_455 6_565 ?
Fe5 Al8 Al12 59.376(11) 8_455 6_565 ?
Al6 Al8 Al12 83.496(16) . 6_565 ?
Fe4 Al8 Al12 113.330(14) 3_455 6_565 ?
Al12 Al8 Al12 114.97(2) . 6_565 ?
Fe5 Al8 Al10 58.443(10) 3_455 . ?
Fe5 Al8 Al10 127.99(2) 8_455 . ?
Al6 Al8 Al10 88.660(16) . . ?
Fe4 Al8 Al10 62.285(13) 3_455 . ?
Al12 Al8 Al10 63.653(12) . . ?
Al12 Al8 Al10 172.15(2) 6_565 . ?
Fe5 Al8 Al10 127.99(2) 3_455 6_565 ?
Fe5 Al8 Al10 58.443(10) 8_455 6_565 ?
Al6 Al8 Al10 88.660(16) . 6_565 ?
Fe4 Al8 Al10 62.285(13) 3_455 6_565 ?
Al12 Al8 Al10 172.15(2) . 6_565 ?
Al12 Al8 Al10 63.652(12) 6_565 6_565 ?
Al10 Al8 Al10 116.54(2) . 6_565 ?
Fe5 Al8 Fe2 111.750(16) 3_455 1_565 ?
Fe5 Al8 Fe2 111.750(16) 8_455 1_565 ?
Al6 Al8 Fe2 55.850(16) . 1_565 ?
Fe4 Al8 Fe2 115.471(19) 3_455 1_565 ?
Al12 Al8 Fe2 60.103(13) . 1_565 ?
Al12 Al8 Fe2 60.104(13) 6_565 1_565 ?
Al10 Al8 Fe2 114.940(14) . 1_565 ?
Al10 Al8 Fe2 114.939(14) 6_565 1_565 ?
Fe5 Al8 Al5 76.527(15) 3_455 3_455 ?
Fe5 Al8 Al5 76.527(15) 8_455 3_455 ?
Al6 Al8 Al5 112.51(2) . 3_455 ?
Fe4 Al8 Al5 52.884(15) 3_455 3_455 ?
Al12 Al8 Al5 121.924(12) . 3_455 ?
Al12 Al8 Al5 121.924(13) 6_565 3_455 ?
Al10 Al8 Al5 61.548(13) . 3_455 ?
Al10 Al8 Al5 61.548(13) 6_565 3_455 ?
Fe2 Al8 Al5 168.36(2) 1_565 3_455 ?
Fe5 Al8 Al3 73.587(15) 3_455 7_554 ?
Fe5 Al8 Al3 73.587(15) 8_455 7_554 ?
Al6 Al8 Al3 108.13(2) . 7_554 ?
Fe4 Al8 Al3 167.75(2) 3_455 7_554 ?
Al12 Al8 Al3 62.348(13) . 7_554 ?
Al12 Al8 Al3 62.347(13) 6_565 7_554 ?
Al10 Al8 Al3 120.436(13) . 7_554 ?
Al10 Al8 Al3 120.435(13) 6_565 7_554 ?
Fe2 Al8 Al3 52.281(15) 1_565 7_554 ?
Al5 Al8 Al3 139.36(2) 3_455 7_554 ?
Fe3 Al9 Fe5 119.518(17) . . ?
Fe3 Al9 Fe5 119.518(17) . 6 ?
Fe5 Al9 Fe5 83.382(17) . 6 ?
Fe3 Al9 Al4 176.94(3) . . ?
Fe5 Al9 Al4 62.483(14) . . ?
Fe5 Al9 Al4 62.483(14) 6 . ?
Fe3 Al9 Al1 63.407(18) . . ?
Fe5 Al9 Al1 136.247(11) . . ?
Fe5 Al9 Al1 136.247(11) 6 . ?
Al4 Al9 Al1 113.53(3) . . ?
Fe3 Al9 Al11 66.052(13) . 6 ?
Fe5 Al9 Al11 130.38(2) . 6 ?
Fe5 Al9 Al11 58.452(10) 6 6 ?
Al4 Al9 Al11 114.736(14) . 6 ?
Al1 Al9 Al11 92.158(16) . 6 ?
Fe3 Al9 Al11 66.052(13) . . ?
Fe5 Al9 Al11 58.452(10) . . ?
Fe5 Al9 Al11 130.38(2) 6 . ?
Al4 Al9 Al11 114.735(14) . . ?
Al1 Al9 Al11 92.157(16) . . ?
Al11 Al9 Al11 123.38(3) 6 . ?
Fe3 Al9 Al13 114.881(15) . 6 ?
Fe5 Al9 Al13 124.29(2) . 6 ?
Fe5 Al9 Al13 59.607(11) 6 6 ?
Al4 Al9 Al13 63.730(14) . 6 ?
Al1 Al9 Al13 79.179(17) . 6 ?
Al11 Al9 Al13 64.297(12) 6 6 ?
Al11 Al9 Al13 168.99(2) . 6 ?
Fe3 Al9 Al13 114.881(15) . . ?
Fe5 Al9 Al13 59.608(10) . . ?
Fe5 Al9 Al13 124.29(2) 6 . ?
Al4 Al9 Al13 63.730(14) . . ?
Al1 Al9 Al13 79.179(17) . . ?
Al11 Al9 Al13 168.99(2) 6 . ?
Al11 Al9 Al13 64.296(12) . . ?
Al13 Al9 Al13 106.99(2) 6 . ?
Fe3 Al9 Al5 56.473(17) . . ?
Fe5 Al9 Al5 78.718(16) . . ?
Fe5 Al9 Al5 78.718(16) 6 . ?
Al4 Al9 Al5 126.59(3) . . ?
Al1 Al9 Al5 119.88(3) . . ?
Al11 Al9 Al5 64.616(13) 6 . ?
Al11 Al9 Al5 64.617(13) . . ?
Al13 Al9 Al5 125.660(13) 6 . ?
Al13 Al9 Al5 125.661(13) . . ?
Fe3 Al9 Pt1 118.75(2) . . ?
Fe5 Al9 Pt1 104.773(15) . . ?
Fe5 Al9 Pt1 104.773(15) 6 . ?
Al4 Al9 Pt1 58.188(17) . . ?
Al1 Al9 Pt1 55.342(17) . . ?
Al11 Al9 Pt1 114.224(14) 6 . ?
Al11 Al9 Pt1 114.223(14) . . ?
Al13 Al9 Pt1 55.174(13) 6 . ?
Al13 Al9 Pt1 55.173(13) . . ?
Al5 Al9 Pt1 175.22(2) . . ?
Fe3 Al10 Fe5 149.178(18) 5_655 3_455 ?
Fe3 Al10 Al11 65.216(13) 5_655 5_655 ?
Fe5 Al10 Al11 135.534(18) 3_455 5_655 ?
Fe3 Al10 Al8 148.55(2) 5_655 . ?
Fe5 Al10 Al8 57.026(14) 3_455 . ?
Al11 Al10 Al8 108.802(18) 5_655 . ?
Fe3 Al10 Fe4 101.294(14) 5_655 3_455 ?
Fe5 Al10 Fe4 109.521(15) 3_455 3_455 ?
Al11 Al10 Fe4 54.331(12) 5_655 3_455 ?
Al8 Al10 Fe4 57.676(13) . 3_455 ?
Fe3 Al10 Al15 55.801(13) 5_655 5_655 ?
Fe5 Al10 Al15 147.870(18) 3_455 5_655 ?
Al11 Al10 Al15 61.527(11) 5_655 5_655 ?
Al8 Al10 Al15 93.531(18) . 5_655 ?
Fe4 Al10 Al15 53.484(13) 3_455 5_655 ?
Fe3 Al10 Al5 126.533(18) 5_655 3_455 ?
Fe5 Al10 Al5 75.967(15) 3_455 3_455 ?
Al11 Al10 Al5 61.869(16) 5_655 3_455 ?
Al8 Al10 Al5 61.632(16) . 3_455 ?
Fe4 Al10 Al5 51.768(12) 3_455 3_455 ?
Al15 Al10 Al5 102.670(18) 5_655 3_455 ?
Fe3 Al10 Al11 112.967(16) 5_655 3_455 ?
Fe5 Al10 Al11 55.741(12) 3_455 3_455 ?
Al11 Al10 Al11 89.718(15) 5_655 3_455 ?
Al8 Al10 Al11 97.422(17) . 3_455 ?
Fe4 Al10 Al11 112.049(15) 3_455 3_455 ?
Al15 Al10 Al11 151.214(16) 5_655 3_455 ?
Al5 Al10 Al11 60.671(14) 3_455 3_455 ?
Fe3 Al10 Al12 114.658(16) 5_655 . ?
Fe5 Al10 Al12 56.888(12) 3_455 . ?
Al11 Al10 Al12 156.708(19) 5_655 . ?
Al8 Al10 Al12 58.064(14) . . ?
Fe4 Al10 Al12 105.172(15) 3_455 . ?
Al15 Al10 Al12 98.254(14) 5_655 . ?
Al5 Al10 Al12 116.759(18) 3_455 . ?
Al11 Al10 Al12 110.144(17) 3_455 . ?
Fe3 Al10 Al1 54.437(13) 5_655 . ?
Fe5 Al10 Al1 111.333(17) 3_455 . ?
Al11 Al10 Al1 113.115(18) 5_655 . ?
Al8 Al10 Al1 107.974(18) . . ?
Fe4 Al10 Al1 111.002(16) 3_455 . ?
Al15 Al10 Al1 62.348(15) 5_655 . ?
Al5 Al10 Al1 162.423(19) 3_455 . ?
Al11 Al10 Al1 136.830(18) 3_455 . ?
Al12 Al10 Al1 60.393(15) . . ?
Fe3 Al10 Al5 53.776(13) 5_655 5_655 ?
Fe5 Al10 Al5 110.480(18) 3_455 5_655 ?
Al11 Al10 Al5 61.627(14) 5_655 5_655 ?
Al8 Al10 Al5 153.301(19) . 5_655 ?
Fe4 Al10 Al5 115.590(16) 3_455 5_655 ?
Al15 Al10 Al5 101.650(17) 5_655 5_655 ?
Al5 Al10 Al5 93.388(11) 3_455 5_655 ?
Al11 Al10 Al5 59.505(15) 3_455 5_655 ?
Al12 Al10 Al5 138.917(18) . 5_655 ?
Al1 Al10 Al5 98.541(16) . 5_655 ?
Fe4 Al11 Fe5 151.326(18) 7_645 . ?
Fe4 Al11 Al9 146.47(2) 7_645 . ?
Fe5 Al11 Al9 58.121(14) . . ?
Fe4 Al11 Al10 64.077(13) 7_645 5_655 ?
Fe5 Al11 Al10 136.311(18) . 5_655 ?
Al9 Al11 Al10 105.156(18) . 5_655 ?
Fe4 Al11 Fe3 100.352(14) 7_645 . ?
Fe5 Al11 Fe3 108.275(14) . . ?
Al9 Al11 Fe3 54.136(13) . . ?
Al10 Al11 Fe3 54.197(12) 5_655 . ?
Fe4 Al11 Al15 55.926(13) 7_645 . ?
Fe5 Al11 Al15 145.404(17) . . ?
Al9 Al11 Al15 90.713(18) . . ?
Al10 Al11 Al15 61.276(11) 5_655 . ?
Fe3 Al11 Al15 52.848(13) . . ?
Fe4 Al11 Al10 114.893(16) 7_645 3_545 ?
Fe5 Al11 Al10 56.206(11) . 3_545 ?
Al9 Al11 Al10 95.999(18) . 3_545 ?
Al10 Al11 Al10 90.282(15) 5_655 3_545 ?
Fe3 Al11 Al10 110.687(15) . 3_545 ?
Al15 Al11 Al10 151.527(17) . 3_545 ?
Fe4 Al11 Al5 53.972(13) 7_645 7_645 ?
Fe5 Al11 Al5 112.366(18) . 7_645 ?
Al9 Al11 Al5 151.47(2) . 7_645 ?
Al10 Al11 Al5 61.450(15) 5_655 7_645 ?
Fe3 Al11 Al5 115.212(16) . 7_645 ?
Al15 Al11 Al5 102.219(17) . 7_645 ?
Al10 Al11 Al5 61.102(15) 3_545 7_645 ?
Fe4 Al11 Al6 55.032(13) 7_645 1_545 ?
Fe5 Al11 Al6 111.571(18) . 1_545 ?
Al9 Al11 Al6 108.923(18) . 1_545 ?
Al10 Al11 Al6 112.084(18) 5_655 1_545 ?
Fe3 Al11 Al6 109.640(15) . 1_545 ?
Al15 Al11 Al6 61.464(14) . 1_545 ?
Al10 Al11 Al6 139.633(17) 3_545 1_545 ?
Al5 Al11 Al6 99.585(15) 7_645 1_545 ?
Fe4 Al11 Al13 115.734(16) 7_645 . ?
Fe5 Al11 Al13 57.431(11) . . ?
Al9 Al11 Al13 58.638(15) . . ?
Al10 Al11 Al13 152.575(19) 5_655 . ?
Fe3 Al11 Al13 101.337(15) . . ?
Al15 Al11 Al13 94.985(13) . . ?
Al10 Al11 Al13 112.136(17) 3_545 . ?
Al5 Al11 Al13 142.992(18) 7_645 . ?
Al6 Al11 Al13 60.713(14) 1_545 . ?
Fe4 Al11 Al5 126.150(19) 7_645 . ?
Fe5 Al11 Al5 75.581(15) . . ?
Al9 Al11 Al5 58.500(16) . . ?
Al10 Al11 Al5 62.532(16) 5_655 . ?
Fe3 Al11 Al5 51.484(12) . . ?
Al15 Al11 Al5 102.087(18) . . ?
Al10 Al11 Al5 59.529(14) 3_545 . ?
Al5 Al11 Al5 93.668(12) 7_645 . ?
Al6 Al11 Al5 160.673(18) 1_545 . ?
Al13 Al11 Al5 114.566(18) . . ?
Fe4 Al11 Al2 101.146(14) 7_645 . ?
Fe5 Al11 Al2 50.190(10) . . ?
Al9 Al11 Al2 104.256(17) . . ?
Al10 Al11 Al2 142.305(19) 5_655 . ?
Fe3 Al11 Al2 158.015(16) . . ?
Al15 Al11 Al2 140.878(18) . . ?
Al10 Al11 Al2 63.593(15) 3_545 . ?
Al5 Al11 Al2 81.602(16) 7_645 . ?
Al6 Al11 Al2 79.450(16) 1_545 . ?
Al13 Al11 Al2 64.864(15) . . ?
Al5 Al11 Al2 116.630(18) . . ?
Pt1 Al12 Fe5 146.994(18) . 3_455 ?
Pt1 Al12 Al14 66.771(13) . 5_654 ?
Fe5 Al12 Al14 130.941(18) 3_455 5_654 ?
Pt1 Al12 Al8 151.45(2) . . ?
Fe5 Al12 Al8 56.748(14) 3_455 . ?
Al14 Al12 Al8 111.804(19) 5_654 . ?
Pt1 Al12 Fe2 102.717(14) . 1_565 ?
Fe5 Al12 Fe2 110.046(15) 3_455 1_565 ?
Al14 Al12 Fe2 55.012(12) 5_654 1_565 ?
Al8 Al12 Fe2 60.746(13) . 1_565 ?
Pt1 Al12 Al10 115.659(16) . . ?
Fe5 Al12 Al10 55.771(11) 3_455 . ?
Al14 Al12 Al10 164.831(19) 5_654 . ?
Al8 Al12 Al10 58.283(14) . . ?
Fe2 Al12 Al10 110.932(15) 1_565 . ?
Pt1 Al12 Al1 56.185(13) . . ?
Fe5 Al12 Al1 109.928(17) 3_455 . ?
Al14 Al12 Al1 118.458(18) 5_654 . ?
Al8 Al12 Al1 107.776(18) . . ?
Fe2 Al12 Al1 116.192(16) 1_565 . ?
Al10 Al12 Al1 59.936(14) . . ?
Pt1 Al12 Al3 129.055(18) . 7_554 ?
Fe5 Al12 Al3 72.189(15) 3_455 7_554 ?
Al14 Al12 Al3 62.812(16) 5_654 7_554 ?
Al8 Al12 Al3 61.531(16) . 7_554 ?
Fe2 Al12 Al3 52.198(13) 1_565 7_554 ?
Al10 Al12 Al3 114.877(18) . 7_554 ?
Al1 Al12 Al3 166.429(19) . 7_554 ?
Pt1 Al12 Al14 112.638(16) . 3_455 ?
Fe5 Al12 Al14 53.293(11) 3_455 3_455 ?
Al14 Al12 Al14 84.943(16) 5_654 3_455 ?
Al8 Al12 Al14 95.245(18) . 3_455 ?
Fe2 Al12 Al14 108.163(15) 1_565 3_455 ?
Al10 Al12 Al14 106.567(16) . 3_455 ?
Al1 Al12 Al14 135.586(18) . 3_455 ?
Al3 Al12 Al14 56.859(14) 7_554 3_455 ?
Pt1 Al12 Al13 56.618(11) . 6 ?
Fe5 Al12 Al13 153.487(18) 3_455 6 ?
Al14 Al12 Al13 59.085(13) 5_654 6 ?
Al8 Al12 Al13 97.160(18) . 6 ?
Fe2 Al12 Al13 51.759(11) 1_565 6 ?
Al10 Al12 Al13 108.708(16) . 6 ?
Al1 Al12 Al13 71.059(15) . 6 ?
Al3 Al12 Al13 100.895(17) 7_554 6 ?
Al14 Al12 Al13 144.012(17) 3_455 6 ?
Pt1 Al12 Al3 54.467(12) . . ?
Fe5 Al12 Al3 107.293(17) 3_455 . ?
Al14 Al12 Al3 57.613(14) 5_654 . ?
Al8 Al12 Al3 150.90(2) . . ?
Fe2 Al12 Al3 112.220(15) 1_565 . ?
Al10 Al12 Al3 136.843(17) . . ?
Al1 Al12 Al3 100.523(15) . . ?
Al3 Al12 Al3 91.332(11) 7_554 . ?
Al14 Al12 Al3 58.633(14) 3_455 . ?
Al13 Al12 Al3 98.290(17) 6 . ?
Fe2 Al13 Pt1 107.249(15) . . ?
Fe2 Al13 Fe5 140.510(18) . . ?
Pt1 Al13 Fe5 111.205(15) . . ?
Fe2 Al13 Al9 154.86(2) . . ?
Pt1 Al13 Al9 65.844(14) . . ?
Fe5 Al13 Al9 56.745(14) . . ?
Fe2 Al13 Al14 56.504(12) . 2_654 ?
Pt1 Al13 Al14 64.052(12) . 2_654 ?
Fe5 Al13 Al14 137.220(17) . 2_654 ?
Al9 Al13 Al14 128.661(19) . 2_654 ?
Fe2 Al13 Al4 143.785(19) . . ?
Pt1 Al13 Al4 59.198(13) . . ?
Fe5 Al13 Al4 58.482(14) . . ?
Al9 Al13 Al4 55.494(16) . . ?
Al14 Al13 Al4 89.001(17) 2_654 . ?
Fe2 Al13 Al7 55.562(9) . . ?
Pt1 Al13 Al7 118.421(14) . . ?
Fe5 Al13 Al7 97.132(13) . . ?
Al9 Al13 Al7 149.529(18) . . ?
Al14 Al13 Al7 58.399(11) 2_654 . ?
Al4 Al13 Al7 98.973(15) . . ?
Fe2 Al13 Al11 113.131(16) . . ?
Pt1 Al13 Al11 117.306(16) . . ?
Fe5 Al13 Al11 55.078(11) . . ?
Al9 Al13 Al11 57.066(14) . . ?
Al14 Al13 Al11 167.432(18) 2_654 . ?
Al4 Al13 Al11 102.386(17) . . ?
Al7 Al13 Al11 123.720(16) . . ?
Fe2 Al13 Al6 54.930(13) . 1_545 ?
Pt1 Al13 Al6 122.156(17) . 1_545 ?
Fe5 Al13 Al6 108.472(17) . 1_545 ?
Al9 Al13 Al6 106.679(17) . 1_545 ?
Al14 Al13 Al6 108.555(17) 2_654 1_545 ?
Al4 Al13 Al6 161.26(2) . 1_545 ?
Al7 Al13 Al6 95.933(13) . 1_545 ?
Al11 Al13 Al6 59.561(14) . 1_545 ?
Fe2 Al13 Al12 60.011(12) . 6 ?
Pt1 Al13 Al12 53.405(11) . 6 ?
Fe5 Al13 Al12 157.487(18) . 6 ?
Al9 Al13 Al12 100.787(18) . 6 ?
Al14 Al13 Al12 55.949(13) 2_654 6 ?
Al4 Al13 Al12 112.082(18) . 6 ?
Al7 Al13 Al12 104.807(14) . 6 ?
Al11 Al13 Al12 113.789(16) . 6 ?
Al6 Al13 Al12 74.581(15) 1_545 6 ?
Fe5 Al14 Fe2 148.403(18) . 5_644 ?
Fe5 Al14 Al12 141.890(19) . 5_654 ?
Fe2 Al14 Al12 63.579(13) 5_644 5_654 ?
Fe5 Al14 Al4 61.310(14) . . ?
Fe2 Al14 Al4 141.68(2) 5_644 . ?
Al12 Al14 Al4 107.053(19) 5_654 . ?
Fe5 Al14 Al7 103.035(14) . . ?
Fe2 Al14 Al7 56.763(9) 5_644 . ?
Al12 Al14 Al7 115.075(16) 5_654 . ?
Al4 Al14 Al7 104.046(16) . . ?
Fe5 Al14 Al3 75.978(16) . 5_654 ?
Fe2 Al14 Al3 130.36(2) 5_644 5_654 ?
Al12 Al14 Al3 67.376(17) 5_654 5_654 ?
Al4 Al14 Al3 61.518(16) . 5_654 ?
Al7 Al14 Al3 164.401(18) . 5_654 ?
Fe5 Al14 Al13 140.842(18) . 2_654 ?
Fe2 Al14 Al13 55.754(12) 5_644 2_654 ?
Al12 Al14 Al13 64.968(14) 5_654 2_654 ?
Al4 Al14 Al13 86.196(18) . 2_654 ?
Al7 Al14 Al13 62.006(12) . 2_654 ?
Al3 Al14 Al13 108.745(19) 5_654 2_654 ?
Fe5 Al14 Pt1 111.513(15) . 5_654 ?
Fe2 Al14 Pt1 99.445(14) 5_644 5_654 ?
Al12 Al14 Pt1 53.672(12) 5_654 5_654 ?
Al4 Al14 Pt1 54.878(13) . 5_654 ?
Al7 Al14 Pt1 113.450(14) . 5_654 ?
Al3 Al14 Pt1 54.383(13) 5_654 5_654 ?
Al13 Al14 Pt1 55.075(11) 2_654 5_654 ?
Fe5 Al14 Al3 113.952(18) . 3_545 ?
Fe2 Al14 Al3 53.887(13) 5_644 3_545 ?
Al12 Al14 Al3 62.094(15) 5_654 3_545 ?
Al4 Al14 Al3 157.796(19) . 3_545 ?
Al7 Al14 Al3 98.157(14) . 3_545 ?
Al3 Al14 Al3 96.371(12) 5_654 3_545 ?
Al13 Al14 Al3 104.275(18) 2_654 3_545 ?
Pt1 Al14 Al3 115.372(16) 5_654 3_545 ?
Fe5 Al14 Al12 56.750(11) . 3_545 ?
Fe2 Al14 Al12 115.799(16) 5_644 3_545 ?
Al12 Al14 Al12 95.056(16) 5_654 3_545 ?
Al4 Al14 Al12 101.641(18) . 3_545 ?
Al7 Al14 Al12 131.665(16) . 3_545 ?
Al3 Al14 Al12 61.089(15) 5_654 3_545 ?
Al13 Al14 Al12 159.995(19) 2_654 3_545 ?
Pt1 Al14 Al12 114.844(15) 5_654 3_545 ?
Al3 Al14 Al12 62.492(15) 3_545 3_545 ?
Fe5 Al14 Al2 51.244(11) . . ?
Fe2 Al14 Al2 97.220(15) 5_644 . ?
Al12 Al14 Al2 143.351(19) 5_654 . ?
Al4 Al14 Al2 106.578(18) . . ?
Al7 Al14 Al2 69.604(13) . . ?
Al3 Al14 Al2 118.467(19) 5_654 . ?
Al13 Al14 Al2 131.607(19) 2_654 . ?
Pt1 Al14 Al2 161.406(17) 5_654 . ?
Al3 Al14 Al2 81.303(17) 3_545 . ?
Al12 Al14 Al2 64.100(15) 3_545 . ?
Fe3 Al15 Fe3 71.279(16) 5_655 . ?
Fe3 Al15 Fe4 108.822(6) 5_655 3_445 ?
Fe3 Al15 Fe4 172.853(7) . 3_445 ?
Fe3 Al15 Fe4 172.853(7) 5_655 7_645 ?
Fe3 Al15 Fe4 108.821(6) . 7_645 ?
Fe4 Al15 Fe4 72.014(16) 3_445 7_645 ?
Fe3 Al15 Al10 113.914(18) 5_655 5_655 ?
Fe3 Al15 Al10 55.970(10) . 5_655 ?
Fe4 Al15 Al10 128.408(18) 3_445 5_655 ?
Fe4 Al15 Al10 62.113(10) 7_645 5_655 ?
Fe3 Al15 Al10 55.971(10) 5_655 6 ?
Fe3 Al15 Al10 113.915(18) . 6 ?
Fe4 Al15 Al10 62.113(10) 3_445 6 ?
Fe4 Al15 Al10 128.408(18) 7_645 6 ?
Al10 Al15 Al10 169.11(3) 5_655 6 ?
Fe3 Al15 Al11 128.549(18) 5_655 . ?
Fe3 Al15 Al11 63.380(10) . . ?
Fe4 Al15 Al11 113.200(17) 3_445 . ?
Fe4 Al15 Al11 55.371(10) 7_645 . ?
Al10 Al15 Al11 57.198(11) 5_655 . ?
Al10 Al15 Al11 124.207(11) 6 . ?
Fe3 Al15 Al11 63.380(10) 5_655 2_655 ?
Fe3 Al15 Al11 128.550(18) . 2_655 ?
Fe4 Al15 Al11 55.371(10) 3_445 2_655 ?
Fe4 Al15 Al11 113.201(17) 7_645 2_655 ?
Al10 Al15 Al11 124.208(11) 5_655 2_655 ?
Al10 Al15 Al11 57.197(11) 6 2_655 ?
Al11 Al15 Al11 167.63(3) . 2_655 ?
Fe3 Al15 Al6 132.422(11) 5_655 1_545 ?
Fe3 Al15 Al6 117.599(10) . 1_545 ?
Fe4 Al15 Al6 56.770(13) 3_445 1_545 ?
Fe4 Al15 Al6 54.225(13) 7_645 1_545 ?
Al10 Al15 Al6 107.333(15) 5_655 1_545 ?
Al10 Al15 Al6 80.499(14) 6 1_545 ?
Al11 Al15 Al6 59.759(13) . 1_545 ?
Al11 Al15 Al6 110.657(17) 2_655 1_545 ?
Fe3 Al15 Al6 117.599(10) 5_655 5_655 ?
Fe3 Al15 Al6 132.421(11) . 5_655 ?
Fe4 Al15 Al6 54.225(13) 3_445 5_655 ?
Fe4 Al15 Al6 56.770(13) 7_645 5_655 ?
Al10 Al15 Al6 80.499(14) 5_655 5_655 ?
Al10 Al15 Al6 107.333(15) 6 5_655 ?
Al11 Al15 Al6 110.658(17) . 5_655 ?
Al11 Al15 Al6 59.760(13) 2_655 5_655 ?
Al6 Al15 Al6 91.14(2) 1_545 5_655 ?
Fe3 Al15 Al1 57.861(13) 5_655 5_655 ?
Fe3 Al15 Al1 53.348(13) . 5_655 ?
Fe4 Al15 Al1 133.085(11) 3_445 5_655 ?
Fe4 Al15 Al1 116.144(10) 7_645 5_655 ?
Al10 Al15 Al1 59.442(13) 5_655 5_655 ?
Al10 Al15 Al1 112.123(17) 6 5_655 ?
Al11 Al15 Al1 107.168(15) . 5_655 ?
Al11 Al15 Al1 81.633(14) 2_655 5_655 ?
Al6 Al15 Al1 166.295(15) 1_545 5_655 ?
Al6 Al15 Al1 90.053(10) 5_655 5_655 ?
Fe3 Al15 Al1 53.348(13) 5_655 . ?
Fe3 Al15 Al1 57.862(13) . . ?
Fe4 Al15 Al1 116.144(10) 3_445 . ?
Fe4 Al15 Al1 133.085(11) 7_645 . ?
Al10 Al15 Al1 112.123(17) 5_655 . ?
Al10 Al15 Al1 59.441(14) 6 . ?
Al11 Al15 Al1 81.633(14) . . ?
Al11 Al15 Al1 107.167(15) 2_655 . ?
Al6 Al15 Al1 90.053(10) 1_545 . ?
Al6 Al15 Al1 166.295(15) 5_655 . ?
Al1 Al15 Al1 92.02(2) 5_655 . ?
 
_refine_diff_density_max    2.073
_refine_diff_density_min   -1.075
_refine_diff_density_rms    0.274

_shelx_res_file
;
TITL AFPas1a-20161124_twin1_hklf5
    AFPas1a-20161124_twin1_hklf5_LIST4.res
    created by SHELXL-2016/6 at 11:07:23 on 29-Nov-2017
CELL 0.71073 15.4634 8.0701 12.4586 90 107.686 90
ZERR 1 0.000316   0.000170   0.000265     0.0000     0.0023     0.0000
LATT 7
SYMM -x,y,-z

SFAC  Pt Fe Al
UNIT   0 24 78
FMAP 2                       ! Fo-Fc Fourier
PLAN -20                     ! printer plots and full analysis of peak list
DEFS 0.02 0.1 0.01 0.04

L.S. 300                      ! 300 cycles full-matrix least-squares
TEMP -160
ACTA                         ! CIF-output, bonds, Fourier, peak search
LIST4

EXYZ PT1 FE1
EADP PT1 FE1

WGHT    0.054000    1.707200
EXTI    0.007483
BASF   0.17031
FVAR       1.53869   0.05403
PT1   1    0.414575    0.000000   -0.382410    20.50000    0.00308    0.00267 =
         0.00267    0.00000    0.00103    0.00000
FE1   2    0.414575    0.000000   -0.382410   -20.50000    0.00308    0.00267 =
         0.00267    0.00000    0.00103    0.00000
FE2   2    0.401932   -0.500000   -0.376329    10.50000    0.00268    0.00243 =
         0.00260    0.00000    0.00049    0.00000
FE3   2    0.590442    0.000000   -0.011696    10.50000    0.00294    0.00274 =
         0.00251    0.00000    0.00080    0.00000
FE4   2    0.902494    0.000000   -0.014408    10.50000    0.00267    0.00253 =
         0.00250    0.00000    0.00068    0.00000
FE5   2    0.680259   -0.206501   -0.277937    11.00000    0.00278    0.00283 =
         0.00268   -0.00006    0.00071    0.00004
AL1   3    0.434085    0.000000   -0.173772    10.50000    0.00444    0.00464 =
         0.00361    0.00000    0.00127    0.00000
AL2   3    0.677149   -0.500000   -0.281379    10.50000    0.00804    0.00327 =
         0.00627    0.00000    0.00201    0.00000
AL3   3    0.262553    0.000000   -0.535301    10.50000    0.00354    0.00400 =
         0.00785    0.00000    0.00033    0.00000
AL4   3    0.573704    0.000000   -0.419452    10.50000    0.00487    0.00393 =
         0.00325    0.00000    0.00125    0.00000
AL5   3    0.740920    0.000000   -0.038419    10.50000    0.00307    0.00394 =
         0.00711    0.00000    0.00185    0.00000
AL6   3    0.479461    0.500000   -0.170797    10.50000    0.00399    0.00464 =
         0.00309    0.00000    0.00064    0.00000
AL7   3    0.500000   -0.500000   -0.500000    10.25000    0.00332    0.00249 =
         0.00395    0.00000    0.00232    0.00000
AL8   3    0.305722    0.500000   -0.226654    10.50000    0.00418    0.00345 =
         0.00442    0.00000    0.00108    0.00000
AL9   3    0.586712    0.000000   -0.211643    10.50000    0.00479    0.00277 =
         0.00302    0.00000    0.00167    0.00000
AL10  3    0.314453    0.217666   -0.110754    11.00000    0.00399    0.00448 =
         0.00340    0.00042    0.00095    0.00066
AL11  3    0.632253   -0.287885   -0.109670    11.00000    0.00445    0.00437 =
         0.00341    0.00031    0.00120   -0.00053
AL12  3    0.321775    0.220750   -0.334331    11.00000    0.00458    0.00462 =
         0.00387    0.00017    0.00165    0.00076
AL13  3    0.508383   -0.267416   -0.329811    11.00000    0.00440    0.00421 =
         0.00431    0.00010    0.00055   -0.00095
AL14  3    0.636846   -0.281227   -0.478348    11.00000    0.00489    0.00448 =
         0.00354   -0.00084    0.00117   -0.00066
AL15  3    0.500000   -0.250507    0.000000    10.50000    0.00368    0.00322 =
         0.00487    0.00000    0.00114    0.00000
HKLF 5


REM  AFPas1a-20161124_twin1_hklf5
REM R1 =  0.0283 for   11587 Fo > 4sig(Fo)  and  0.0286 for all   11636 data
REM    139 parameters refined using      0 restraints

END

WGHT      0.0539      1.6924

REM Highest difference peak  2.073,  deepest hole -1.075,  1-sigma level  0.274
Q1    1   0.6023 -0.5000 -0.2338  10.50000  0.05    1.37
Q2    1   0.4076 -0.5000 -0.6172  10.50000  0.05    1.36
Q3    1   0.2503  0.0000 -0.3494  10.50000  0.05    1.12
Q4    1   0.9458  0.0000  0.0498  10.50000  0.05    1.12
Q5    1   0.4489 -0.5000 -0.5708  10.50000  0.05    1.09
Q6    1   0.3999 -0.5000 -0.4163  10.50000  0.05    1.07
Q7    1   0.4462 -0.5000 -0.1741  10.50000  0.05    1.07
Q8    1   0.6703 -0.2824 -0.2038  11.00000  0.05    1.04
Q9    1   0.5630  0.0000 -0.2806  10.50000  0.05    1.00
Q10   1   0.6103  0.0000 -0.2934  10.50000  0.05    0.98
Q11   1   0.4428  0.0000  0.0725  10.50000  0.05    0.98
Q12   1   0.6080  0.0000 -0.3472  10.50000  0.05    0.96
Q13   1   0.7411  0.0000 -0.0650  10.50000  0.05    0.96
Q14   1   0.6814 -0.2526  0.0333  11.00000  0.05    0.96
Q15   1   0.9065  0.0000  0.0295  10.50000  0.05    0.95
Q16   1   1.0724  0.0000  0.0518  10.50000  0.05    0.95
Q17   1   0.9202  0.0000  0.0836  10.50000  0.05    0.94
Q18   1   0.3172  0.2660 -0.2785  11.00000  0.05    0.94
Q19   1   0.3603  0.2072 -0.2747  11.00000  0.05    0.94
Q20   1   0.3086  0.2268 -0.5089  11.00000  0.05    0.94
;
_shelx_res_checksum   52698

_shelx_hkl_file
;
   0   0  -2 4814.38 2.13631   1
   0   0   3 149190. 15.1602   1
   3   0  -4 18208.1 7.77851  -2
   0   0   4 18208.1 7.77851   1
   0   0  -5 261.635 0.94349   1
   0   0   6 56394.5 13.3428   1
   0   0   7 25560.4 8.66650   1
   6   0  -8 138119. 24.6832  -2
   0   0   8 138119. 24.6832   1
   0   0  -9 4609.53 3.37490   1
   0   0  10 70971.9 13.9888   1
   0   0 -11 58474.3 15.0477   1
   9   0 -12 1530.07 3.04454  -2
   0   0  12 1530.07 3.04454   1
   0   0 -13 2560.93 7.67260   1
  10   0 -13 4513.10 4.37946  -2
   0   0  13 4513.10 4.37946   1
   0   0  14 3645.04 5.12069   1
   0   0  15 3980.02 5.51079   1
  12   0 -16 7797.05 12.3582  -2
   0   0  16 7797.05 12.3582   1
 -13   0  17 122.040 3.66305  -2
   0   0 -17 122.040 3.66305   1
   0   0 -18 86721.9 62.7026   1
   0   0 -19 7115.14 19.1855   1
 -16   0  21 20714.7 32.5298  -2
   0   0 -21 20714.7 32.5298   1
   0   0 -22 2187.35 11.2294   1
   0   0 -23 9875.69 23.5716   1
   0   1   0 0.76442 0.17996  -2
   0  -1   0 0.76442 0.17996   1
   0   1  -1 0.23365 0.10154   1
   0   1  -2 1.04755 0.14302   1
   0  -1   3 0.02222 0.20416   1
  -3   1   4 211.872 0.71609  -2
   0  -1  -4 211.872 0.71609   1
   0   1  -5 0.06198 0.29285   1
   0   1  -6 0.93112 0.32491   1
   0   1  -7 0.44932 0.26457   1
  -6   1   8 3.41088 0.36010  -2
   0  -1  -8 3.41088 0.36010   1
   0  -1   9 2.00946 0.29483   1
  -7  -1   9 9539.26 7.34849  -2
   0   1  -9 9539.26 7.34849   1
   0  -1  10 0.15785 0.25387   1
   0  -1  11 3.41675 0.31702   1
   9   1 -12 30.9607 0.53750  -2
   0  -1  12 30.9607 0.53750   1
   0  -1 -13-1.49923 0.43904   1
 -10   1  13 16.9901 0.76177  -2
   0  -1 -13 16.9901 0.76177   1
   0   1 -14 3.88034 0.41008   1
   0  -1  15 3.13278 0.50685   1
 -12   1  16 6.47451 0.79806  -2
   0  -1 -16 6.47451 0.79806   1
  13   1 -17 950.860 3.53723  -2
   0  -1  17 950.860 3.53723   1
   0  -1  18 0.43500 1.02237   1
   0  -1 -19 0.15689 1.59708   1
 -15  -1  20 5757.84 14.9848  -2
   0   1 -20 5757.84 14.9848   1
 -16  -1  21 1.49175 1.93098  -2
   0   1 -21 1.49175 1.93098   1
   0  -1 -22-1.33521 1.53388   1
   0   1 -23 2.47087 1.36125   1
   0  -2   0 42509.3 7.29062  -2
   0   2   0 42509.3 7.29062   1
   0   2   1 6495.60 1.93636   1
   0  -2   2 79239.8 7.91698   1
   0   2   3 2681.89 1.54797   1
  -3   2   4 8838.76 3.52399  -2
   0  -2  -4 8838.76 3.52399   1
   0  -2  -5 550832. 29.3011   1
   0  -2   6 4141.79 2.18293   1
   0   2  -7 2334.33 1.71461   1
  -6   2   8 12572.8 5.43633  -2
   0  -2  -8 12572.8 5.43633   1
   0  -2  -9 55489.7 10.4565   1
  -7   2   9 47282.6 19.6647  -2
   0  -2  -9 47282.6 19.6647   1
   0  -2 -10 1235.16 1.43150   1
   0   2 -11 1428.45 1.72143   1
  -9  -2  12 8395.35 6.03747  -2
   0   2 -12 8395.35 6.03747   1
   0  -2 -13 85998.9 45.1245   1
 -10   2  13 116880. 22.1812  -2
   0  -2 -13 116880. 22.1812   1
   0  -2  14 3504.63 3.66416   1
   0  -2  15 30431.9 12.1589   1
 -11  -2  15 29532.9 26.6871  -2
   0   2 -15 29532.9 26.6871   1
  12  -2 -16 23548.0 15.0905  -2
   0   2  16 23548.0 15.0905   1
 -13   2  17 4294.55 6.39643  -2
   0  -2 -17 4294.55 6.39643   1
   0  -2  18 8386.60 11.0017   1
   0  -2 -19 377.458 2.52122   1
 -15  -2  20 1067.61 6.64585  -2
   0   2 -20 1067.61 6.64585   1
 -16  -2  21 3723.60 10.0414  -2
   0   2 -21 3723.60 10.0414   1
   0   2 -22 196.689 2.44503   1
   0   3   0 1.01008 0.38335  -2
   0  -3   0 1.01008 0.38335   1
   0   3  -1 0.75827 0.23043   1
   0  -3   2 0.25923 0.26611   1
   0   3   3-0.10368 0.21078   1
  -3   3   4 3.89002 0.25661  -2
   0  -3  -4 3.89002 0.25661   1
   0  -3   5-0.50362 0.23729   1
   0  -3  -6 0.20224 0.23866   1
   0   3  -7 0.25999 0.27156   1
  -6   3   8 2.03317 0.35454  -2
   0  -3  -8 2.03317 0.35454   1
   0   3   9 5.12831 0.45844   1
   7   3  -9 16665.0 9.79641  -2
   0  -3   9 16665.0 9.79641   1
   0  -3  10 1.55531 0.37980   1
   0   3 -11 1.63249 0.40126   1
  -9   3  12 413.983 1.62554  -2
   0  -3 -12 413.983 1.62554   1
  10   3 -13 0.61351 0.62413  -2
   0  -3  13 0.61351 0.62413   1
   0  -3  14-0.57055 0.47586   1
   0   3  15 5.78333 0.56297   1
 -11  -3  15 1397.35 6.16050  -2
   0   3 -15 1397.35 6.16050   1
 -12   3  16 2.75427 0.82791  -2
   0  -3 -16 2.75427 0.82791   1
 -13  -3  17 2515.90 5.23923  -2
   0   3 -17 2515.90 5.23923   1
   0  -3 -18-3.68848 0.86408   1
   0   3 -19-9.05633 1.07956   1
 -15  -3  20 5170.86 11.3646  -2
   0   3 -20 5170.86 11.3646   1
 -16   3  21-0.50526 1.41880  -2
   0  -3 -21-0.50526 1.41880   1
   0  -3 -22-1.51736 1.35634   1
   0   4   0 899232. 62.7386  -2
   0  -4   0 899232. 62.7386   1
   0  -4  -1 262.176 0.64437   1
   0  -4   2 15322.6 5.46601   1
   0  -4  -3 71185.4 9.77947   1
  -3  -4   4 7736.76 3.64180  -2
   0   4  -4 7736.76 3.64180   1
   0   4  -5 28513.3 5.47630   1
   0  -4   6 57124.3 8.17183   1
   0   4  -7 5207.58 2.59290   1
   6  -4  -8 76556.1 15.8343  -2
   0   4   8 76556.1 15.8343   1
   0  -4   9 4668.31 3.39662   1
  -7   4   9 4524.98 9.11149  -2
   0  -4  -9 4524.98 9.11149   1
   0   4  10 43776.7 11.2540   1
   0  -4 -11 25066.0 8.94967   1
  -9   4  12 71.7026 0.88614  -2
   0  -4 -12 71.7026 0.88614   1
 -10   4  13 1341.04 2.25661  -2
   0  -4 -13 1341.04 2.25661   1
   0  -4  14 2370.19 3.45517   1
   0   4 -15 893.021 2.37094   1
 -11  -4  15 910.817 5.28657  -2
   0   4 -15 910.817 5.28657   1
 -12  -4  16 381.949 2.81755  -2
   0   4 -16 381.949 2.81755   1
 -13   4  17 153.403 1.78347  -2
   0  -4 -17 153.403 1.78347   1
   0  -4  18 41722.2 21.7385   1
   0  -4 -19 4301.73 10.4170   1
  14   4 -19 5890.81 15.2501  -2
   0  -4  19 5890.81 15.2501   1
  15   4 -20 27147.2 26.7391  -2
   0  -4  20 27147.2 26.7391   1
 -16  -4  21 11447.8 13.5840  -2
   0   4 -21 11447.8 13.5840   1
   0  -4 -22 1855.79 5.70337   1
   0   5   0 6.20071 1.01918  -2
   0  -5   0 6.20071 1.01918   1
   0  -5  -1 2.84244 0.27145   1
   0  -5   2-0.08582 0.23852   1
   0   5  -3-0.23277 0.21794   1
   3   5  -4 126.646 0.58958  -2
   0  -5   4 126.646 0.58958   1
   0  -5   5 0.56503 0.26118   1
  -4   5   5 3.97743 1.45251  -2
   0  -5  -5 3.97743 1.45251   1
   0  -5   6 0.88097 0.25519   1
   0  -5  -7-0.09484 0.34981   1
   6  -5  -8 4.40618 0.51259  -2
   0   5   8 4.40618 0.51259   1
   0   5   9 4.38205 0.65872   1
  -7   5   9 2830.03 3.74641  -2
   0  -5  -9 2830.03 3.74641   1
   0  -5  10 0.52653 0.45999   1
   0   5 -11-0.51146 0.40873   1
  -9   5  12 95.0470 0.99984  -2
   0  -5 -12 95.0470 0.99984   1
   0   5 -13-5.79255 1.09505   1
  10   5 -13 4.26523 0.74667  -2
   0  -5  13 4.26523 0.74667   1
   0  -5 -14 4.07378 0.54596   1
   0  -5 -15-5.36707 0.93843   1
 -12   5  16 8.18406 1.23092  -2
   0  -5 -16 8.18406 1.23092   1
 -13  -5  17 404.120 2.41005  -2
   0   5 -17 404.120 2.41005   1
   0  -5  18-1.86776 0.86032   1
   0   5 -19-5.53949 1.40190   1
  14  -5 -19 4.27921 1.54879  -2
   0   5  19 4.27921 1.54879   1
 -15  -5  20 4626.40 9.79036  -2
   0   5 -20 4626.40 9.79036   1
 -16  -5  21 17.6430 1.50240  -2
   0   5 -21 17.6430 1.50240   1
   0  -6   0 199263. 31.6273  -2
   0   6   0 199263. 31.6273   1
   0  -6  -1 1039.05 1.16842   1
   0  -6  -2 8967.44 3.23528   1
   0  -6  -3 4450.83 2.35418   1
  -3   6   4 10434.2 4.43259  -2
   0  -6  -4 10434.2 4.43259   1
   0  -6   5 121458. 15.1702   1
  -4   6   5 153115. 49.2588  -2
   0  -6  -5 153115. 49.2588   1
   0   6  -6 40.5488 0.43612   1
   0  -6   7 2675.49 2.78135   1
  -6   6   8 28576.3 11.1365  -2
   0  -6  -8 28576.3 11.1365   1
   0  -6  -9 35390.8 27.8039   1
  -7  -6   9 34794.7 10.4559  -2
   0   6  -9 34794.7 10.4559   1
   0  -6 -10 8484.15 5.35053   1
   0   6  11 14501.3 7.80476   1
  -8   6  11 16227.5 21.6028  -2
   0  -6 -11 16227.5 21.6028   1
   9   6 -12 14450.1 9.85270  -2
   0  -6  12 14450.1 9.85270   1
  10  -6 -13 20373.4 9.70159  -2
   0   6  13 20373.4 9.70159   1
   0   6 -14 1442.55 3.79636   1
   0   6 -15 9439.17 13.6960   1
  11   6 -15 9155.65 18.1230  -2
   0  -6  15 9155.65 18.1230   1
  12   6 -16 1890.68 6.01027  -2
   0  -6  16 1890.68 6.01027   1
  13   6 -17 1562.71 4.36532  -2
   0  -6  17 1562.71 4.36532   1
   0  -6 -18 959.813 3.53178   1
   0  -6 -19 22.7618 0.94281   1
  14  -6 -19 444.488 5.23451  -2
   0   6  19 444.488 5.23451   1
  15  -6 -20 9585.99 16.6181  -2
   0   6  20 9585.99 16.6181   1
  16  -6 -21 1648.18 4.68449  -2
   0   6  21 1648.18 4.68449   1
   0   7   0 4.94251 0.38597  -2
   0  -7   0 4.94251 0.38597   1
   0  -7  -1 0.49828 0.26506   1
   0  -7   2 0.44586 0.23613   1
   0  -7   3 1.36484 0.26045   1
  -3   7   4 116.882 0.71080  -2
   0  -7  -4 116.882 0.71080   1
   0  -7  -5-0.79460 0.32921   1
   4   7  -5 6.47802 1.13621  -2
   0  -7   5 6.47802 1.13621   1
   0   7   6 0.83263 0.39369   1
   0  -7  -7 1.86557 0.44549   1
  -6  -7   8 1.02521 0.67824  -2
   0   7  -8 1.02521 0.67824   1
   0  -7  -9 40.1067 1.94853   1
  -7   7   9 11810.5 7.03161  -2
   0  -7  -9 11810.5 7.03161   1
   0  -7 -10 3.34728 0.58953   1
   0  -7  11-0.24788 0.57472   1
  -8   7  11 37.3087 2.88339  -2
   0  -7 -11 37.3087 2.88339   1
   9   7 -12 16.5898 0.73830  -2
   0  -7  12 16.5898 0.73830   1
  10  -7 -13 7.67715 1.04775  -2
   0   7  13 7.67715 1.04775   1
   0  -7  14 3.25181 1.09248   1
   0   7 -15 5.77746 1.08858   1
  11   7 -15 823.657 4.58695  -2
   0  -7  15 823.657 4.58695   1
 -12   7  16-6.69849 1.05243  -2
   0  -7 -16-6.69849 1.05243   1
 -13  -7  17 2123.70 5.14231  -2
   0   7 -17 2123.70 5.14231   1
   0  -7  18 8.53980 1.05624   1
  14  -7 -18-6.05034 2.70242  -2
   0   7  18-6.05034 2.70242   1
   0  -7 -19 0.33155 1.30320   1
  14  -7 -19 4.17010 1.94356  -2
   0   7  19 4.17010 1.94356   1
  15  -7 -20 4304.92 9.44524  -2
   0   7  20 4304.92 9.44524   1
   0   8   0 246731. 44.1767  -2
   0  -8   0 246731. 44.1767   1
   0  -8  -1 560.951 1.22770   1
   0  -8  -2 30637.8 8.00245   1
   0  -8  -3 28347.6 9.23014   1
  -2   8   3 32200.4 24.4258  -2
   0  -8  -3 32200.4 24.4258   1
  -3   8   4 1617.30 3.02563  -2
   0  -8  -4 1617.30 3.02563   1
   0  -8  -5 110709. 24.6079   1
   4   8  -5 125836. 35.7173  -2
   0  -8   5 125836. 35.7173   1
   0  -8  -6 44217.7 16.0842   1
   0  -8  -7 714.508 2.01541   1
   5   8  -7 729.876 4.44550  -2
   0  -8   7 729.876 4.44550   1
  -6   8   8 17958.0 11.9757  -2
   0  -8  -8 17958.0 11.9757   1
   0  -8  -9 1608.05 6.29097   1
  -7  -8   9 1730.97 3.29122  -2
   0   8  -9 1730.97 3.29122   1
   0  -8 -10 7968.53 6.54764   1
   0   8 -11 1375.92 3.13551   1
   8   8 -11 1345.05 6.72861  -2
   0  -8  11 1345.05 6.72861   1
  -9  -8  12 1147.02 4.42992  -2
   0   8 -12 1147.02 4.42992   1
  10   8 -13 31629.2 19.0658  -2
   0  -8  13 31629.2 19.0658   1
   0  -8 -14 532.707 2.54806   1
   0  -8 -15 491.712 3.32621   1
  11  -8 -15 527.182 6.11427  -2
   0   8  15 527.182 6.11427   1
  12   8 -16 9349.17 13.6464  -2
   0  -8  16 9349.17 13.6464   1
  13   8 -17 1173.64 4.71210  -2
   0  -8  17 1173.64 4.71210   1
   0   8  18 2255.34 5.40834   1
   0   8 -19 978.381 7.35971   1
   0   9   0 3.66070 0.60318  -2
   0  -9   0 3.66070 0.60318   1
   0  -9   1 0.40513 0.41192   1
   0  -9   2 1.18029 0.46061   1
   0   9   3-2.71393 0.62483   1
   2   9  -3 5.61137 0.74069  -2
   0  -9   3 5.61137 0.74069   1
  -3   9   4 146.070 1.25389  -2
   0  -9  -4 146.070 1.25389   1
   0  -9  -5 1.08437 0.64571   1
  -4   9   5 9.05003 1.23041  -2
   0  -9  -5 9.05003 1.23041   1
   0  -9  -6 2.60140 0.54766   1
   0  -9  -7-2.02989 0.72348   1
  -5   9   7 152.973 1.56723  -2
   0  -9  -7 152.973 1.56723   1
  -6   9   8 1.32450 0.72939  -2
   0  -9  -8 1.32450 0.72939   1
   0  -9  -9 0.53040 0.90388   1
  -7  -9   9 1090.07 3.15144  -2
   0   9  -9 1090.07 3.15144   1
   0  -9  10 0.20728 0.75962   1
   0  -9 -11 2.48610 0.80072   1
  -8   9  11 6.30413 2.99780  -2
   0  -9 -11 6.30413 2.99780   1
  -9   9  12 150.974 2.12829  -2
   0  -9 -12 150.974 2.12829   1
 -10  -9  13 0.50154 1.12915  -2
   0   9 -13 0.50154 1.12915   1
   0   9  14 3.29123 1.02141   1
   0   9 -15 1.88042 1.81658   1
  11   9 -15 974.519 5.07375  -2
   0  -9  15 974.519 5.07375   1
 -12  -9  16 8.05512 1.90630  -2
   0   9 -16 8.05512 1.90630   1
  13   9 -17 999.728 4.44452  -2
   0  -9  17 999.728 4.44452   1
   0  -9  18-1.67885 1.42705   1
  14  -9 -18-12.2422 3.15644  -2
   0   9  18-12.2422 3.15644   1
   0  10   0 297834. 80.3705  -2
   0 -10   0 297834. 80.3705   1
   0 -10   1 22.8464 0.68200   1
   0  10   2 40.5043 0.81880   1
   0 -10  -3 5358.99 6.76183   1
  -2  10   3 6121.93 12.2017  -2
   0 -10  -3 6121.93 12.2017   1
   3  10  -4 3699.96 6.01490  -2
   0 -10   4 3699.96 6.01490   1
   0 -10   5 6296.46 8.85842   1
   4  10  -5 8233.18 8.53905  -2
   0 -10   5 8233.18 8.53905   1
   0  10  -6 71.9836 0.79154   1
   0 -10  -7 5898.97 8.02668   1
  -5  10   7 6239.68 9.59962  -2
   0 -10  -7 6239.68 9.59962   1
   6  10  -8 35939.4 27.0489  -2
   0 -10   8 35939.4 27.0489   1
   7  10  -9 11759.5 11.6198  -2
   0 -10   9 11759.5 11.6198   1
   0 -10  10 13356.1 15.7727   1
   0  10 -11 21291.7 29.6722   1
   8  10 -11 27686.9 30.9751  -2
   0 -10  11 27686.9 30.9751   1
   9 -10 -12 12886.7 18.4126  -2
   0  10  12 12886.7 18.4126   1
  10 -10 -13 99.9700 1.76283  -2
   0  10  13 99.9700 1.76283   1
   0  10 -14 160.908 1.79186   1
   0  10 -15 795.838 6.51593   1
  11 -10 -15 901.000 7.35807  -2
   0  10  15 901.000 7.35807   1
  12 -10 -16 1452.37 6.74563  -2
   0  10  16 1452.37 6.74563   1
 -13 -10  17 413.014 2.82490  -2
   0  10 -17 413.014 2.82490   1
   0 -11   3 4.23637 1.31777   1
   3  11  -4 616.643 3.41900  -2
   0 -11   4 616.643 3.41900   1
   0  11   5 21.8744 1.50924   1
  -4 -11   5-2.71366 1.84293  -2
   0  11  -5-2.71366 1.84293   1
   0  11  -6 11.2117 1.41319   1
   0  11  -7 11.0479 1.39023   1
   5  11  -7 406.807 3.63805  -2
   0 -11   7 406.807 3.63805   1
  -6 -11   8 3.50637 1.04456  -2
   0  11  -8 3.50637 1.04456   1
   7  11  -9 5112.26 9.42605  -2
   0 -11   9 5112.26 9.42605   1
   0  11  10 10.6038 0.82032   1
   0  11 -11-16.2901 1.79047   1
   8  11 -11 0.80945 1.86877  -2
   0 -11  11 0.80945 1.86877   1
   9 -11 -12 822.959 4.80458  -2
   0  11  12 822.959 4.80458   1
  10  11 -13 11.1142 1.29275  -2
   0 -11  13 11.1142 1.29275   1
   0 -11  14 1.29131 1.03263   1
   0 -11  15 11.4958 1.20369   1
  12 -11 -16-5.68214 3.28427  -2
   0  11  16-5.68214 3.28427   1
   5 -12  -7 874.999 6.15237  -2
   0  12   7 874.999 6.15237   1
   6 -12  -8 5640.63 22.1175  -2
   0  12   8 5640.63 22.1175   1
   7 -12  -9 71.8255 2.40125  -2
   0  12   9 71.8255 2.40125   1
   0  12  10 1943.17 6.62098   1
   8 -12 -11 261.712 2.36092  -2
   0  12  11 261.712 2.36092   1
   9 -12 -12 528.474 4.79913  -2
   0  12  12 528.474 4.79913   1
   0  12  14 71.7820 1.34212   1
   7 -13  -9 799.729 7.76178  -2
   0  13   9 799.729 7.76178   1
   0  13  10 2.17424 2.26830   1
   9 -13 -12 584.528 7.78536  -2
   0  13  12 584.528 7.78536   1
   1   0 -23 0.58286 1.88026   1
   1   0 -22 10.8952 1.95109   1
 -14   0  20 110.777 4.00157  -2
   1   0 -20 110.777 4.00157   1
   1   0 -19-22.7798 2.40797   1
   1   0 -18-0.82993 2.48301   1
 -12   0  17 511.853 5.32596  -2
   1   0 -17 511.853 5.32596   1
  11   0 -16 10.2314 0.98323  -2
  -1   0  16 10.2314 0.98323   1
  -1   0  15 2.02842 0.62889   1
  -1   0  14 0.99836 0.53892   1
   1   0 -13 4.55861 1.02924   1
  -9   0  13 3.08147 0.60287  -2
   1   0 -13 3.08147 0.60287   1
  -8   0  12 1520.29 2.97882  -2
   1   0 -12 1520.29 2.97882   1
  -1   0  11-1.55466 0.37820   1
   1   0 -10-0.72288 0.36945   1
  -1   0   9 8.84127 0.80585   1
  -6   0   9 887.833 3.88192  -2
   1   0  -9 887.833 3.88192   1
  -5   0   8 2.89095 0.46031  -2
   1   0  -8 2.89095 0.46031   1
   1   0  -7 2.19454 0.41986   1
   1   0  -6 4.00794 0.48826   1
   1   0  -5 0.01921 0.41341   1
  -2   0   4 8552.40 7.07084  -2
   1   0  -4 8552.40 7.07084   1
   1   0  -3 0.94826 0.27565   1
  -1   0   2 3.81326 0.51660   1
   1   0   1 0.39058 0.15114   1
   1   0   2 0.22549 0.21974   1
  -1   0  -3 1.15733 0.38800   1
  -4   0   4 2507.05 3.12564  -2
  -1   0  -4 2507.05 3.12564   1
  -1   0  -5 3.50060 0.48132   1
  -1   0  -6-0.38913 0.47507   1
  -1   0  -7-0.59318 0.42466   1
   7   0  -8-0.82565 0.47805  -2
   1   0   8-0.82565 0.47805   1
  -1   0  -9 3.15951 0.37869   1
  -8   0   9 38.6722 1.73282  -2
  -1   0  -9 38.6722 1.73282   1
   1   0  10-0.40266 0.38675   1
  -1   0 -11 4.48446 0.39070   1
 -10   0  12 6476.14 6.30542  -2
  -1   0 -12 6476.14 6.30542   1
   1   0  13-1.42165 1.37909   1
 -11   0  13 4.80680 0.51706  -2
  -1   0 -13 4.80680 0.51706   1
   1   0  14 6.82644 0.58591   1
   1   0  15 4.65850 0.76129   1
 -13   0  16-1.78730 2.70634  -2
  -1   0 -16-1.78730 2.70634   1
 -14   0  17 1858.61 8.99927  -2
  -1   0 -17 1858.61 8.99927   1
  -1   0 -18 1.49403 2.39983   1
  -1   0 -19 0.22730 1.95340   1
 -16   0  20 1489.58 11.2910  -2
  -1   0 -20 1489.58 11.2910   1
  -1   0 -22-19.2178 2.11647   1
   1   1 -23 24.8650 1.37267   1
   1  -1 -22 3660.70 10.1802   1
 -15   1  21 2823.22 8.77747  -2
   1  -1 -21 2823.22 8.77747   1
 -14  -1  20 3104.19 11.2989  -2
   1   1 -20 3104.19 11.2989   1
   1  -1 -19 70.1185 2.88712   1
   1  -1 -18 221.206 1.95040   1
  12   1 -17 1499.72 4.49701  -2
  -1  -1  17 1499.72 4.49701   1
  11  -1 -16 2944.22 5.43091  -2
  -1   1  16 2944.22 5.43091   1
  -1   1  15 1120.90 2.32758   1
   1   1 -14 4240.20 3.61539   1
  -9  -1  13 149.238 0.91068  -2
   1   1 -13 149.238 0.91068   1
  -8  -1  12 1918.37 2.50259  -2
   1   1 -12 1918.37 2.50259   1
   1  -1 -11 6330.57 3.30573   1
   1   1 -10 2783.52 2.07273   1
   1   1  -9 9262.68 4.02749   1
  -6   1   9 9678.08 7.25876  -2
   1  -1  -9 9678.08 7.25876   1
   5  -1  -8 10678.1 4.71979  -2
  -1   1   8 10678.1 4.71979   1
  -1   1   7 3833.15 2.24182   1
   1   1  -6 43009.8 8.84232   1
   1   1  -5 7291.46 2.99940   1
  -2   1   4 402.778 1.01622  -2
   1  -1  -4 402.778 1.01622   1
  -1  -1   3 472.923 2.30405   1
   1   1  -2 689.653 0.73987   1
  -1   1   1 5970.65 9.31565   1
  -1  -1   0 1119.97 4.64327  -2
  -1   1   0 1119.97 4.64327   1
  -1  -1  -1 6147.06 2.73239   1
   1   1   2 843.739 0.74015   1
   1   1   3 1039.88 0.89940   1
  -4   1   4 3147.94 2.43522  -2
  -1  -1  -4 3147.94 2.43522   1
  -1   1  -5 89387.4 11.1101   1
  -1  -1  -6 2495.51 2.09395   1
   1   1   7 25517.3 5.60357   1
   7   1  -8 502.765 1.31807  -2
   1  -1   8 502.765 1.31807   1
  -1  -1  -9 19052.9 5.40193   1
  -8   1   9 18521.4 17.3286  -2
  -1  -1  -9 18521.4 17.3286   1
   1   1  10 20242.5 5.58095   1
  -1   1 -11 3383.98 2.46917   1
 -10   1  12 528.034 1.39131  -2
  -1  -1 -12 528.034 1.39131   1
  -1   1 -13 116.572 1.86589   1
 -11  -1  13 451.296 1.27238  -2
  -1   1 -13 451.296 1.27238   1
   1  -1  14 5902.65 4.70631   1
  -1  -1 -15 22091.6 11.1351   1
  12  -1 -15 23708.5 25.2601  -2
   1   1  15 23708.5 25.2601   1
 -13  -1  16 1029.98 4.59136  -2
  -1   1 -16 1029.98 4.59136   1
 -14   1  17 620.058 3.05623  -2
  -1  -1 -17 620.058 3.05623   1
  -1  -1 -18 1516.55 6.20894   1
  -1  -1 -19 1134.81 5.54851   1
 -16  -1  20 4393.15 13.3099  -2
  -1   1 -20 4393.15 13.3099   1
 -17  -1  21 514.104 3.93527  -2
  -1   1 -21 514.104 3.93527   1
  -1   1 -22 865.563 5.08000   1
   1  -2 -23 14.8276 1.45009   1
   1   2 -22 5.09521 1.31680   1
 -15   2  21 14.4697 1.65984  -2
   1  -2 -21 14.4697 1.65984   1
 -14   2  20 1401.90 5.69827  -2
   1  -2 -20 1401.90 5.69827   1
   1   2 -19-7.72215 1.09104   1
   1   2 -18 4.16227 1.08797   1
 -12  -2  17 132.100 1.47055  -2
   1   2 -17 132.100 1.47055   1
  11   2 -16 0.52600 0.72367  -2
  -1  -2  16 0.52600 0.72367   1
  -1   2  15-1.59794 0.45916   1
   1  -2 -14 3.65263 0.43028   1
   1   2 -13 0.03725 0.73368   1
  -9   2  13 2.07612 0.59708  -2
   1  -2 -13 2.07612 0.59708   1
  -8  -2  12 807.796 1.98661  -2
   1   2 -12 807.796 1.98661   1
   1   2 -11 0.15706 0.33233   1
   1   2 -10 0.19840 0.29011   1
  -1   2   9 1.51168 0.44006   1
  -6   2   9 14390.2 7.29618  -2
   1  -2  -9 14390.2 7.29618   1
   5   2  -8 0.19394 0.37711  -2
  -1  -2   8 0.19394 0.37711   1
  -1  -2   7 1.19656 0.25074   1
  -1  -2   6 0.80886 0.25385   1
  -1  -2   5 0.06975 0.24733   1
   2   2  -4 5636.04 2.42754  -2
  -1  -2   4 5636.04 2.42754   1
   1   2  -3 0.59354 0.32117   1
  -1   2   2 0.01308 0.14814   1
  -1   2   1 0.62735 0.16370   1
   1   2   0 0.71571 0.18312  -2
   1  -2   0 0.71571 0.18312   1
  -1   2  -1 1.15520 0.16443   1
  -1  -2  -2-0.04626 0.08841   1
  -1  -2  -3-4.05128 0.28135   1
  -4   2   4 2600.31 2.35134  -2
  -1  -2  -4 2600.31 2.35134   1
   1  -2   5 0.60237 0.28918   1
  -1   2  -6 1.66886 0.23197   1
  -1  -2  -7 0.45946 0.25765   1
  -7   2   8 0.23114 0.36163  -2
  -1  -2  -8 0.23114 0.36163   1
  -1   2  -9 3.04618 0.42169   1
  -8   2   9 8641.60 6.16772  -2
  -1  -2  -9 8641.60 6.16772   1
  -1  -2 -10 1.81599 0.31465   1
  -1  -2 -11 0.93485 0.31716   1
 -10  -2  12 433.968 1.77004  -2
  -1   2 -12 433.968 1.77004   1
  11  -2 -13-0.75704 0.59356  -2
   1   2  13-0.75704 0.59356   1
  -1  -2 -14 0.43911 0.44089   1
   1   2  15 3.01976 0.48898   1
 -13   2  16-3.55524 0.82711  -2
  -1  -2 -16-3.55524 0.82711   1
  14  -2 -17 41.8416 1.10274  -2
   1   2  17 41.8416 1.10274   1
   1  -2  18 14.1403 0.95053   1
  -1  -2 -19 4.73183 1.37465   1
  15   2 -19-4.64150 1.93908  -2
   1  -2  19-4.64150 1.93908   1
 -16  -2  20 55.7488 2.15119  -2
  -1   2 -20 55.7488 2.15119   1
 -17  -2  21 14.2677 1.93090  -2
  -1   2 -21 14.2677 1.93090   1
  -1  -2 -22 18.1160 1.41488   1
   1  -3 -22 5917.01 12.8749   1
 -15   3  21 2936.77 8.33792  -2
   1  -3 -21 2936.77 8.33792   1
 -14  -3  20 5685.69 12.1034  -2
   1   3 -20 5685.69 12.1034   1
  -1  -3  19 2063.80 5.70960   1
  -1   3  18 1138.09 3.56008   1
 -12   3  17 3248.22 5.80438  -2
   1  -3 -17 3248.22 5.80438   1
  11   3 -16 5114.63 6.62195  -2
  -1  -3  16 5114.63 6.62195   1
  -1  -3  15 2869.16 4.02024   1
  -1  -3  14 13427.4 7.23596   1
   1  -3 -13 13257.1 10.6854   1
  -9  -3  13 13958.1 8.72171  -2
   1   3 -13 13958.1 8.72171   1
   8  -3 -12 1271.41 2.48994  -2
  -1   3  12 1271.41 2.48994   1
   1   3 -11 29630.1 8.59680   1
  -1  -3  10 46001.8 10.1422   1
   1   3  -9 2205.07 2.03743   1
   6   3  -9 2110.77 4.28269  -2
  -1  -3   9 2110.77 4.28269   1
  -5   3   8 54109.1 11.4813  -2
   1  -3  -8 54109.1 11.4813   1
   1  -3  -7 28684.8 5.68160   1
   1  -3  -6 23679.1 6.40648   1
   1   3  -5 8449.22 2.90710   1
   2  -3  -4 435.352 0.69300  -2
  -1   3   4 435.352 0.69300   1
  -1  -3   3 109873. 8.52566   1
  -1   3   2 365.349 0.88993   1
  -1  -3   1 3686.55 1.69728   1
   1   3   0 2951.30 2.04912  -2
   1  -3   0 2951.30 2.04912   1
  -1   3  -1 84.1468 0.58670   1
   1   3   2 45257.6 6.70007   1
  -1  -3  -3 44877.3 7.08948   1
  -4  -3   4 21217.7 6.53491  -2
  -1   3  -4 21217.7 6.53491   1
  -1  -3  -5 21588.3 4.87052   1
  -1   3  -6 14232.3 4.03067   1
  -1  -3  -7 7319.53 3.10875   1
   7   3  -8 82913.0 14.5367  -2
   1  -3   8 82913.0 14.5367   1
  -1   3  -9 53560.1 11.0798   1
  -8   3   9 54611.4 18.0993  -2
  -1  -3  -9 54611.4 18.0993   1
  -1  -3 -10 89225.4 14.2957   1
   1  -3  11 1466.39 2.16528   1
 -10  -3  12 65.1285 0.87512  -2
  -1   3 -12 65.1285 0.87512   1
  -1   3 -13 33341.9 29.1231   1
  11   3 -13 34122.0 11.5508  -2
   1  -3  13 34122.0 11.5508   1
   1   3  14 23.8583 0.53207   1
   1  -3  15 971.394 2.30916   1
  13  -3 -16 3702.50 5.89967  -2
   1   3  16 3702.50 5.89967   1
 -14   3  17 6089.94 7.90939  -2
  -1  -3 -17 6089.94 7.90939   1
   1  -3  18 109.361 1.30378   1
  -1  -3 -19 1629.14 5.13017   1
 -16  -3  20 13688.7 19.1987  -2
  -1   3 -20 13688.7 19.1987   1
 -17  -3  21 6991.31 13.4702  -2
  -1   3 -21 6991.31 13.4702   1
  -1  -3 -22 366.584 3.30074   1
  -1  -4  22 1.50227 1.19852   1
 -15   4  21 0.74243 1.41039  -2
   1  -4 -21 0.74243 1.41039   1
 -14  -4  20 13.6164 1.69100  -2
   1   4 -20 13.6164 1.69100   1
  -1  -4  19-5.73632 1.03999   1
  13  -4 -19 0.45179 2.08023  -2
  -1   4  19 0.45179 2.08023   1
  -1   4  18-1.19058 0.91228   1
 -12   4  17 485.887 2.51414  -2
   1  -4 -17 485.887 2.51414   1
  11   4 -16 4.63703 1.19469  -2
  -1  -4  16 4.63703 1.19469   1
   1   4 -15-1.86486 0.52409   1
  -1   4  14-2.20375 0.49094   1
   1  -4 -13 2.58257 1.61649   1
  -9   4  13 1.06638 0.67844  -2
   1  -4 -13 1.06638 0.67844   1
  -8   4  12 1111.12 2.62548  -2
   1  -4 -12 1111.12 2.62548   1
  -1  -4  11-0.55791 0.45898   1
  -1  -4  10-0.23888 0.35832   1
   1   4  -9 0.39762 0.41110   1
   6   4  -9 867.753 4.14933  -2
  -1  -4   9 867.753 4.14933   1
   5   4  -8 0.53895 0.53850  -2
  -1  -4   8 0.53895 0.53850   1
  -1   4   7 0.76885 0.33529   1
   1  -4  -6 0.13713 0.14006   1
  -1  -4   5-0.54495 0.14421   1
   2   4  -4 2013.25 1.60954  -2
  -1  -4   4 2013.25 1.60954   1
   1  -4  -3-0.07805 0.24620   1
   1   4  -2 2.14476 0.24599   1
  -1  -4   1 0.38935 0.26737   1
  -1   4   0 1.52472 0.30008  -2
  -1  -4   0 1.52472 0.30008   1
  -1   4  -1-0.03049 0.25934   1
  -1   4  -2-0.31394 0.26733   1
  -1  -4  -3 0.35667 0.26045   1
  -4   4   4 668.411 1.20508  -2
  -1  -4  -4 668.411 1.20508   1
   1  -4   5 0.05162 0.24512   1
  -1  -4  -6 1.24997 0.26259   1
  -1   4  -7 0.89425 0.28370   1
  -7   4   8 0.62343 0.35113  -2
  -1  -4  -8 0.62343 0.35113   1
  -1   4  -9 3.12435 0.63795   1
  -8  -4   9 226.898 1.34305  -2
  -1   4  -9 226.898 1.34305   1
   1  -4  10 1.23306 0.48239   1
   1  -4  11 1.53936 0.48016   1
 -10   4  12 3432.29 4.58014  -2
  -1  -4 -12 3432.29 4.58014   1
  11  -4 -13 4.18548 0.64506  -2
   1   4  13 4.18548 0.64506   1
   1  -4  14 3.38859 0.49634   1
   1  -4  15 7.72732 0.59801   1
 -13  -4  16-2.61301 1.46753  -2
  -1   4 -16-2.61301 1.46753   1
  14  -4 -17 1307.49 3.95957  -2
   1   4  17 1307.49 3.95957   1
   1   4  18 0.30918 0.84713   1
  -1  -4 -19 5.95627 1.35675   1
  15  -4 -19 11.4515 1.51505  -2
   1   4  19 11.4515 1.51505   1
  16   4 -20 381.126 3.27519  -2
   1  -4  20 381.126 3.27519   1
  17   4 -21 8.11520 1.40494  -2
   1  -4  21 8.11520 1.40494   1
  -1  -4 -22-11.7500 1.43841   1
   1   5 -22 1678.52 5.39038   1
 -15  -5  21 14863.3 19.8272  -2
   1   5 -21 14863.3 19.8272   1
  14  -5 -20 989.516 5.48219  -2
  -1   5  20 989.516 5.48219   1
   1   5 -19 1697.20 6.61461   1
  13  -5 -19 3571.32 9.03378  -2
  -1   5  19 3571.32 9.03378   1
   1  -5 -18 20.1250 0.92393   1
 -12  -5  17 688.342 2.95708  -2
   1   5 -17 688.342 2.95708   1
 -11  -5  16 16419.0 19.2165  -2
   1   5 -16 16419.0 19.2165   1
   1   5 -15 7890.38 7.75399   1
 -10  -5  15 7911.82 15.6291  -2
   1   5 -15 7911.82 15.6291   1
   1   5 -14 699.285 1.81866   1
  -9   5  13 9045.53 5.72982  -2
   1  -5 -13 9045.53 5.72982   1
  -8   5  12 8094.20 7.13955  -2
   1  -5 -12 8094.20 7.13955   1
  -1  -5  11 40.9669 0.95883   1
   1  -5 -10 3826.36 3.44558   1
   1  -5  -9 10357.4 7.79794   1
   6   5  -9 10575.5 7.12353  -2
  -1  -5   9 10575.5 7.12353   1
   5  -5  -8 88011.9 17.9599  -2
  -1   5   8 88011.9 17.9599   1
  -1  -5   7 602.935 1.11871   1
  -1  -5   6 50767.2 9.70256   1
   1  -5  -5 25845.7 5.30230   1
   2  -5  -4 84.0186 0.65751  -2
  -1   5   4 84.0186 0.65751   1
   1  -5  -3 55877.1 7.92481   1
  -1   5   2 467.767 1.18345   1
  -1  -5   1 4817.30 2.50627   1
   1  -5   0 1070.44 1.32323  -2
   1   5   0 1070.44 1.32323   1
  -1  -5  -1 5867.40 2.80471   1
  -1   5  -2 28742.3 5.61433   1
   1  -5   3 13750.3 3.83998   1
   4   5  -4 83.0387 0.74344  -2
   1  -5   4 83.0387 0.74344   1
  -1  -5  -5 117175. 12.6713   1
  -1  -5  -6 91.9327 1.00834   1
   1  -5   7 27434.9 8.03116   1
  -7   5   8 36804.9 12.3338  -2
  -1  -5  -8 36804.9 12.3338   1
  -1  -5  -9 1127.94 3.09056   1
  -8   5   9 1039.26 2.22440  -2
  -1  -5  -9 1039.26 2.22440   1
  -1  -5 -10 70.3773 0.82508   1
   1  -5  11 3284.21 3.43662   1
 -10   5  12 1256.09 2.81165  -2
  -1  -5 -12 1256.09 2.81165   1
  11   5 -13 18195.3 8.94371  -2
   1  -5  13 18195.3 8.94371   1
  -1   5 -14 14955.7 8.31357   1
   1  -5  15 42195.6 20.4360   1
  12  -5 -15 45049.8 41.6230  -2
   1   5  15 45049.8 41.6230   1
  13  -5 -16 4023.12 8.49939  -2
   1   5  16 4023.12 8.49939   1
  14   5 -17 28.7661 1.26879  -2
   1  -5  17 28.7661 1.26879   1
  -1  -5 -18 5107.83 7.94302   1
  -1   5 -19 469.700 3.60741   1
  15   5 -19 463.408 4.54844  -2
   1  -5  19 463.408 4.54844   1
 -16  -5  20 859.294 4.86174  -2
  -1   5 -20 859.294 4.86174   1
 -17   5  21 6731.49 10.6199  -2
  -1  -5 -21 6731.49 10.6199   1
  15   6 -21 10.5000 1.35106  -2
  -1  -6  21 10.5000 1.35106   1
 -14  -6  20 115.380 1.56601  -2
   1   6 -20 115.380 1.56601   1
   1   6 -19 5.03530 2.21081   1
  13  -6 -19 10.7111 1.68182  -2
  -1   6  19 10.7111 1.68182   1
   1  -6 -18 4.90536 0.78490   1
  12   6 -17 56.2323 1.35932  -2
  -1  -6  17 56.2323 1.35932   1
 -11  -6  16 3.87061 1.32307  -2
   1   6 -16 3.87061 1.32307   1
   1  -6 -15-0.44936 0.94607   1
   1  -6 -14-0.01259 0.75515   1
  -9   6  13 1.04905 0.71983  -2
   1  -6 -13 1.04905 0.71983   1
   8  -6 -12 347.083 1.77460  -2
  -1   6  12 347.083 1.77460   1
  -1  -6  11-0.10139 0.48421   1
   1  -6 -10-0.28340 0.42560   1
   1   6  -9 13.0041 1.20783   1
  -6   6   9 8893.69 5.66305  -2
   1  -6  -9 8893.69 5.66305   1
  -5   6   8 2.85807 0.64320  -2
   1  -6  -8 2.85807 0.64320   1
  -1  -6   7 1.70115 0.34834   1
   1  -6  -6 1.48240 0.32173   1
  -1   6   5 0.04994 0.33792   1
  -3   6   5-4.46660 1.70179  -2
   1  -6  -5-4.46660 1.70179   1
   2   6  -4 8626.81 4.08456  -2
  -1  -6   4 8626.81 4.08456   1
  -1  -6   3-0.32530 0.23133   1
  -1  -6   2 0.88444 0.19657   1
   1  -6  -1 1.12924 0.24619   1
  -1  -6   0 3.58129 0.29902  -2
  -1   6   0 3.58129 0.29902   1
  -1   6  -1 2.30476 0.22305   1
   1  -6   2 0.57690 0.23510   1
   1   6   3-0.52283 0.24479   1
  -4   6   4 3379.67 2.75905  -2
  -1  -6  -4 3379.67 2.75905   1
   1   6   5 0.72146 0.32267   1
  -5   6   5-2.80313 1.06938  -2
  -1  -6  -5-2.80313 1.06938   1
  -1  -6  -6-0.13654 0.38572   1
   1   6   7 0.99656 0.40021   1
  -7   6   8 2.53017 0.56449  -2
  -1  -6  -8 2.53017 0.56449   1
   1  -6   9 3.59606 0.71355   1
  -8  -6   9 1645.21 3.19822  -2
  -1   6  -9 1645.21 3.19822   1
  -1   6 -10 2.28779 0.45101   1
   1  -6  11-4.58658 0.46521   1
  10   6 -12 3.41902 0.68028  -2
   1  -6  12 3.41902 0.68028   1
 -11  -6  13 9.66093 0.77870  -2
  -1   6 -13 9.66093 0.77870   1
   1   6  14-2.51830 0.98711   1
   1  -6  15-4.48929 1.07719   1
  12  -6 -15 896.621 6.88575  -2
   1   6  15 896.621 6.88575   1
 -13   6  16 1.20375 1.21731  -2
  -1  -6 -16 1.20375 1.21731   1
  14  -6 -17 103.639 1.86507  -2
   1   6  17 103.639 1.86507   1
  -1  -6 -18-5.76677 0.91131   1
  -1  -6 -19 1.94508 1.29283   1
  15   6 -19 7.32967 1.74875  -2
   1  -6  19 7.32967 1.74875   1
 -16   6  20 424.188 3.01421  -2
  -1  -6 -20 424.188 3.01421   1
 -17   6  21-4.63249 2.61388  -2
  -1  -6 -21-4.63249 2.61388   1
 -14  -7  20 5891.14 16.7880  -2
   1   7 -20 5891.14 16.7880   1
   1  -7 -19 1552.76 6.30693   1
  13   7 -19 1721.65 6.65818  -2
  -1  -7  19 1721.65 6.65818   1
  -1  -7  18 961.603 3.55455   1
  12  -7 -17 2744.35 5.79414  -2
  -1   7  17 2744.35 5.79414   1
 -11  -7  16 7620.14 13.6233  -2
   1   7 -16 7620.14 13.6233   1
   1   7 -15 4229.49 7.75292   1
  -1  -7  14 9270.02 9.54424   1
   1  -7 -13 15929.8 22.5962   1
   9  -7 -13 17203.9 12.6281  -2
  -1   7  13 17203.9 12.6281   1
  -8   7  12 1761.28 3.92495  -2
   1  -7 -12 1761.28 3.92495   1
  -1  -7  11 26246.7 11.6555   1
  -7   7  11 32602.1 31.7851  -2
   1  -7 -11 32602.1 31.7851   1
  -1   7  10 37763.5 12.4921   1
   1   7  -9 996.322 3.65513   1
  -6   7   9 997.078 2.40284  -2
   1  -7  -9 997.078 2.40284   1
  -5  -7   8 72107.5 22.6929  -2
   1   7  -8 72107.5 22.6929   1
  -1   7   7 22762.7 8.53917   1
   1  -7  -6 4018.16 3.43939   1
   1  -7  -5 7496.13 4.70377   1
   3   7  -5 12538.0 10.4273  -2
  -1  -7   5 12538.0 10.4273   1
  -2   7   4 672.997 1.44687  -2
   1  -7  -4 672.997 1.44687   1
   1   7  -3 91534.7 12.0930   1
  -1   7   2 132.665 0.53369   1
   1   7  -1 8102.79 3.37687   1
   1   7   0 3963.65 2.33844  -2
   1  -7   0 3963.65 2.33844   1
   1  -7   1 331.522 0.86560   1
   1   7   2 42231.2 7.99948   1
  -1  -7  -3 47846.1 8.34450   1
  -4   7   4 9499.45 6.06647  -2
  -1  -7  -4 9499.45 6.06647   1
  -1  -7  -5 2476.31 2.61859   1
   1  -7   6 6766.66 4.21405   1
   1  -7   7 2110.93 2.45726   1
  -7  -7   8 92317.1 22.3706  -2
  -1   7  -8 92317.1 22.3706   1
  -1   7  -9 43745.0 24.1275   1
  -8   7   9 43682.1 15.0099  -2
  -1  -7  -9 43682.1 15.0099   1
  -1  -7 -10 78793.8 18.3767   1
  -1   7 -11 932.436 2.15365   1
 -10   7  12 35.7033 0.96888  -2
  -1  -7 -12 35.7033 0.96888   1
 -11   7  13 41722.1 19.0025  -2
  -1  -7 -13 41722.1 19.0025   1
   1  -7  14 982.693 3.33519   1
  -1  -7 -15 87.6019 1.78283   1
  12   7 -15 116.410 2.53230  -2
   1  -7  15 116.410 2.53230   1
  13   7 -16 5230.59 10.0427  -2
   1  -7  16 5230.59 10.0427   1
 -14   7  17 5066.76 9.09355  -2
  -1  -7 -17 5066.76 9.09355   1
  -1  -7 -18 280.346 1.99430   1
  -1  -7 -19 2214.70 10.0912   1
  15  -7 -19 2806.52 12.5637  -2
   1   7  19 2806.52 12.5637   1
 -16   7  20 11688.3 18.2427  -2
  -1  -7 -20 11688.3 18.2427   1
 -14  -8  20 620.186 7.39312  -2
   1   8 -20 620.186 7.39312   1
  -1  -8  19-5.76549 1.34051   1
  13  -8 -19-2.90583 2.46343  -2
  -1   8  19-2.90583 2.46343   1
   1   8 -18 4.28064 1.06091   1
  12  -8 -17 388.182 2.92065  -2
  -1   8  17 388.182 2.92065   1
 -11   8  16 2.26605 1.22428  -2
   1  -8 -16 2.26605 1.22428   1
   1  -8 -15-7.25199 1.06931   1
  -1  -8  14 0.71047 0.91721   1
   1  -8 -13-2.14968 1.16615   1
  -9  -8  13 1.11424 1.56628  -2
   1   8 -13 1.11424 1.56628   1
   8  -8 -12 470.658 2.60788  -2
  -1   8  12 470.658 2.60788   1
  -1   8  11 2.98954 0.58994   1
  -7   8  11 2.85680 2.96757  -2
   1  -8 -11 2.85680 2.96757   1
   1  -8 -10-0.86487 0.50455   1
   1  -8  -9 0.61952 1.17310   1
  -6  -8   9 284.513 1.39936  -2
   1   8  -9 284.513 1.39936   1
  -5  -8   8 2.52470 0.61488  -2
   1   8  -8 2.52470 0.61488   1
   1  -8  -7 1.27656 0.49092   1
   1  -8  -6 1.75671 0.39777   1
  -1  -8   5 1.81425 0.46364   1
   3   8  -5 2.25865 1.47731  -2
  -1  -8   5 2.25865 1.47731   1
  -2  -8   4 21.0880 0.50689  -2
   1   8  -4 21.0880 0.50689   1
  -1  -8   3 2.30178 0.34465   1
  -1   8   3 7.19703 1.35914  -2
   1  -8  -3 7.19703 1.35914   1
  -1  -8   2 1.85634 0.37250   1
   1   8  -1 0.97351 0.35258   1
  -1   8   0 1.69444 0.50608  -2
  -1  -8   0 1.69444 0.50608   1
   1   8   1 1.02873 0.33509   1
  -1   8  -2-0.25424 0.33120   1
   1  -8   3 0.52690 0.75069   1
  -3   8   3 2.22763 0.93313  -2
  -1  -8  -3 2.22763 0.93313   1
  -4   8   4 39.1900 0.76648  -2
  -1  -8  -4 39.1900 0.76648   1
  -1  -8  -5 0.47155 0.88016   1
  -5  -8   5-2.00333 1.00812  -2
  -1   8  -5-2.00333 1.00812   1
  -1   8  -6 3.70074 0.55560   1
  -1  -8  -7-4.35022 0.67144   1
   6   8  -7 250.909 3.08131  -2
   1  -8   7 250.909 3.08131   1
  -7   8   8-1.16239 0.74623  -2
  -1  -8  -8-1.16239 0.74623   1
  -8   8   9 1546.91 2.82191  -2
  -1  -8  -9 1546.91 2.82191   1
  -1   8 -10 2.17517 0.65505   1
  -1  -8 -11-9.96072 1.04622   1
   9   8 -11 0.30645 2.43183  -2
   1  -8  11 0.30645 2.43183   1
 -10  -8  12 696.905 3.96970  -2
  -1   8 -12 696.905 3.96970   1
  -1  -8 -13 0.18395 1.42669   1
  11   8 -13 8.83638 1.43184  -2
   1  -8  13 8.83638 1.43184   1
  -1   8 -14-0.78004 0.93796   1
  -1   8 -15 7.91294 1.00305   1
  12   8 -15 359.348 4.68935  -2
   1  -8  15 359.348 4.68935   1
 -13   8  16 7.47231 1.11318  -2
  -1  -8 -16 7.47231 1.11318   1
 -14  -8  17 521.747 2.66880  -2
  -1   8 -17 521.747 2.66880   1
   1   8  18 4.80867 0.95108   1
  -1   8 -19 6.85759 1.40536   1
  15   8 -19-4.44433 2.68272  -2
   1  -8  19-4.44433 2.68272   1
   1   9 -19 358.265 4.49846   1
  13  -9 -19 1142.34 5.43242  -2
  -1   9  19 1142.34 5.43242   1
  -1  -9  18 106.710 1.76863   1
  13  -9 -18 747.384 6.64909  -2
  -1   9  18 747.384 6.64909   1
  12   9 -17 1293.40 4.84233  -2
  -1  -9  17 1293.40 4.84233   1
  11  -9 -16 7361.71 13.3856  -2
  -1   9  16 7361.71 13.3856   1
  -1  -9  15 4031.70 9.83185   1
  10  -9 -15 3799.35 14.2430  -2
  -1   9  15 3799.35 14.2430   1
  -1  -9  14 2237.63 7.16951   1
  -9  -9  13 4620.17 9.72806  -2
   1   9 -13 4620.17 9.72806   1
  -8   9  12 3427.23 9.21991  -2
   1  -9 -12 3427.23 9.21991   1
   1   9 -11 18.5374 2.08158   1
  -7   9  11 398.567 3.26539  -2
   1  -9 -11 398.567 3.26539   1
  -1  -9  10 514.831 2.71917   1
   1  -9  -9 3809.74 9.71664   1
  -6  -9   9 3736.01 4.87035  -2
   1   9  -9 3736.01 4.87035   1
  -5  -9   8 33907.3 17.1310  -2
   1   9  -8 33907.3 17.1310   1
  -1  -9   7 83.0906 0.95711   1
  -4   9   7 92.2371 1.74650  -2
   1  -9  -7 92.2371 1.74650   1
   1  -9  -6 37658.5 13.7774   1
  -1  -9   5 4647.78 5.96573   1
  -3   9   5 6709.24 7.19296  -2
   1  -9  -5 6709.24 7.19296   1
   2   9  -4 93.0553 0.83286  -2
  -1  -9   4 93.0553 0.83286   1
   1  -9  -3 14624.5 8.86000   1
   1   9  -2 315.681 1.12329   1
  -1  -9   1 494.345 1.49155   1
   1   9   0 207.003 1.13590  -2
   1  -9   0 207.003 1.13590   1
   1  -9   1 313.663 1.61593   1
  -1  -9  -2 4900.02 5.17727   1
   1  -9   3 4075.40 3.94264   1
   4   9  -4 1980.17 3.78725  -2
   1  -9   4 1980.17 3.78725   1
  -1  -9  -5 64484.5 27.7832   1
  -5   9   5 72196.7 23.7041  -2
  -1  -9  -5 72196.7 23.7041   1
  -1  -9  -6 443.844 1.51891   1
  -1   9  -7 10756.7 7.94261   1
   6   9  -7 10546.2 16.2498  -2
   1  -9   7 10546.2 16.2498   1
  -7   9   8 14329.4 10.6917  -2
  -1  -9  -8 14329.4 10.6917   1
  -1  -9  -9 758.671 3.56417   1
  -8  -9   9 707.267 2.81614  -2
  -1   9  -9 707.267 2.81614   1
  -1   9 -10 459.764 2.40521   1
   1  -9  11 1246.00 3.93818   1
 -10  -9  12 193.131 2.12611  -2
  -1   9 -12 193.131 2.12611   1
  11   9 -13 6293.17 7.92715  -2
   1  -9  13 6293.17 7.92715   1
  -1  -9 -14 11018.7 11.0419   1
  -1   9 -15 16645.1 18.8781   1
  12   9 -15 17688.1 20.2054  -2
   1  -9  15 17688.1 20.2054   1
  13   9 -16 2785.87 7.49154  -2
   1  -9  16 2785.87 7.49154   1
  14   9 -17 570.058 3.86665  -2
   1  -9  17 570.058 3.86665   1
  -1   9 -18 3146.27 7.70494   1
  -1 -10  18 2.44841 1.24702   1
  12 -10 -17 27.6636 3.17141  -2
  -1  10  17 27.6636 3.17141   1
  11 -10 -16 18.0521 1.71038  -2
  -1  10  16 18.0521 1.71038   1
  -1 -10  15-10.9677 1.15478   1
  10 -10 -15 3221.93 13.4569  -2
  -1  10  15 3221.93 13.4569   1
   1  10 -14 6.81579 1.02724   1
  -9 -10  13 1.30947 1.68670  -2
   1  10 -13 1.30947 1.68670   1
   8  10 -12 39.0481 1.84312  -2
  -1 -10  12 39.0481 1.84312   1
   1  10 -11 14.6064 1.98697   1
  -7  10  11 0.89596 1.61874  -2
   1 -10 -11 0.89596 1.61874   1
   1  10 -10 4.98088 1.00922   1
  -6  10   9 2750.75 5.71759  -2
   1 -10  -9 2750.75 5.71759   1
  -5 -10   8 4.67592 1.09118  -2
   1  10  -8 4.67592 1.09118   1
   1 -10  -7-2.22849 1.28977   1
  -4  10   7 1156.53 3.56518  -2
   1 -10  -7 1156.53 3.56518   1
  -1 -10   6 0.85511 0.60024   1
  -1 -10   5 4.61216 1.76469   1
  -3  10   5 11.4282 1.11670  -2
   1 -10  -5 11.4282 1.11670   1
   2 -10  -4 4497.19 7.64444  -2
  -1  10   4 4497.19 7.64444   1
  -1  10   3 1.52067 0.80832   1
   1  10  -3 10.5256 0.98699  -2
  -1 -10   3 10.5256 0.98699   1
  -1  10   2-1.19703 0.56938   1
  -1 -10   1-0.91101 1.25035   1
  -1  10   0-2.60533 1.19798  -2
  -1 -10   0-2.60533 1.19798   1
   1  10   1-1.68902 0.65994   1
   1 -10   2 1.27737 0.53319   1
   1  10   3 2.69063 0.58909   1
  -4 -10   4 1292.36 3.29005  -2
  -1  10  -4 1292.36 3.29005   1
  -1 -10  -5-4.23970 0.86229   1
  -5 -10   5 4.98779 1.07076  -2
  -1  10  -5 4.98779 1.07076   1
   1 -10   6-2.51119 0.58292   1
  -1  10  -7 1.12228 0.65158   1
   6  10  -7 439.393 3.81219  -2
   1 -10   7 439.393 3.81219   1
   7  10  -8 4.14167 1.47400  -2
   1 -10   8 4.14167 1.47400   1
  -1 -10  -9 4.15318 1.21157   1
  -8 -10   9 130.577 1.97146  -2
  -1  10  -9 130.577 1.97146   1
  -1  10 -10 6.24423 0.72768   1
  -1  10 -11-0.59972 1.02005   1
   9  10 -11 4.77513 1.54431  -2
   1 -10  11 4.77513 1.54431   1
 -10 -10  12 220.849 2.64419  -2
  -1  10 -12 220.849 2.64419   1
 -11 -10  13-6.16126 1.22566  -2
  -1  10 -13-6.16126 1.22566   1
   1 -10  14-5.13890 1.04024   1
  -1  10 -15 13.4811 2.10345   1
  12 -10 -15 865.186 4.88427  -2
   1  10  15 865.186 4.88427   1
 -13 -10  16 7.94279 1.35787  -2
  -1  10 -16 7.94279 1.35787   1
  11  11 -16 216.291 4.29773  -2
  -1 -11  16 216.291 4.29773   1
  10 -11 -15 285.532 2.99719  -2
  -1  11  15 285.532 2.99719   1
   1  11 -14 1344.31 5.68002   1
  10 -11 -14 1384.07 8.81637  -2
  -1  11  14 1384.07 8.81637   1
   9  11 -13 3860.51 9.63484  -2
  -1 -11  13 3860.51 9.63484   1
  -8 -11  12 37.5625 1.32331  -2
   1  11 -12 37.5625 1.32331   1
   1  11 -11 8856.01 19.6718   1
   7  11 -11 9983.79 18.9625  -2
  -1 -11  11 9983.79 18.9625   1
   1  11 -10 5349.95 10.2838   1
  -6  11   9 1853.60 5.01128  -2
   1 -11  -9 1853.60 5.01128   1
   5  11  -8 6779.90 10.4491  -2
  -1 -11   8 6779.90 10.4491   1
   1  11  -7 4337.28 12.4789   1
  -4  11   7 5028.47 13.4449  -2
   1 -11  -7 5028.47 13.4449   1
   1 -11  -6 308.611 3.56932   1
  -1  11   5 82.6340 1.47024   1
  -3 -11   5 540.434 3.21057  -2
   1  11  -5 540.434 3.21057   1
  -2 -11   4 629.593 4.31068  -2
   1  11  -4 629.593 4.31068   1
  -1 -11   3 8325.03 15.7444   1
  -1 -11   2 59.7487 1.91861   1
  -1 -11   1 12206.8 18.2799   1
  -1  11   0 4209.49 10.7132  -2
  -1 -11   0 4209.49 10.7132   1
  -1 -11  -1 1318.48 6.00978   1
  -1 -11  -2 1960.54 7.36854   1
   1  11   3 7137.97 10.3304   1
   4 -11  -4 38.9340 1.16996  -2
   1  11   4 38.9340 1.16996   1
   5 -11  -5 4205.58 11.9582  -2
   1  11   5 4205.58 11.9582   1
   1 -11   6 599.483 3.24546   1
   1 -11   7 2367.01 8.78450   1
   6 -11  -7 2401.07 9.85822  -2
   1  11   7 2401.07 9.85822   1
   7  11  -8 14530.2 22.5764  -2
   1 -11   8 14530.2 22.5764   1
   8 -11  -9 11495.4 14.9784  -2
   1  11   9 11495.4 14.9784   1
   1 -11  10 16608.2 19.0359   1
   9  11 -11 1165.39 5.11248  -2
   1 -11  11 1165.39 5.11248   1
  10  11 -12 1230.27 7.35028  -2
   1 -11  12 1230.27 7.35028   1
  11  11 -13 8351.58 15.1605  -2
   1 -11  13 8351.58 15.1605   1
   1 -11  14 288.321 2.82844   1
  13  11 -16 1595.18 8.70499  -2
   1 -11  16 1595.18 8.70499   1
  10 -12 -15 19.6672 1.97402  -2
  -1  12  15 19.6672 1.97402   1
  -1 -12  14-3.32021 1.75989   1
  10 -12 -14 73.2229 2.43553  -2
  -1  12  14 73.2229 2.43553   1
   9 -12 -13-1.68715 1.58557  -2
  -1  12  13-1.68715 1.58557   1
   8 -12 -12 153.187 2.07506  -2
  -1  12  12 153.187 2.07506   1
   1  12 -11 3.35490 1.64757   1
   7  12 -11-0.87770 1.69866  -2
  -1 -12  11-0.87770 1.69866   1
  -1 -12  10-0.74128 0.98256   1
   6 -12  -9 21.4442 2.28230  -2
  -1  12   9 21.4442 2.28230   1
  -5 -12   8-6.41362 1.82408  -2
   1  12  -8-6.41362 1.82408   1
   6 -12  -7 182.928 3.10826  -2
   1  12   7 182.928 3.10826   1
   7  12  -8 0.71360 1.96069  -2
   1 -12   8 0.71360 1.96069   1
   8 -12  -9 970.780 4.51036  -2
   1  12   9 970.780 4.51036   1
   1  12  10 12.6794 1.14551   1
   9 -12 -11 9.58372 1.69571  -2
   1  12  11 9.58372 1.69571   1
  10 -12 -12 52.9733 1.83202  -2
   1  12  12 52.9733 1.83202   1
  11  12 -13 17.8254 1.59704  -2
   1 -12  13 17.8254 1.59704   1
   1 -12  14 0.43446 1.81397   1
  12 -12 -14 86.4257 3.06310  -2
   1  12  14 86.4257 3.06310   1
   9 -13 -13 87.9578 2.01840  -2
  -1  13  13 87.9578 2.01840   1
   8 -13 -12 47.7598 3.03372  -2
  -1  13  12 47.7598 3.03372   1
   7 -13 -11 1638.05 9.11018  -2
  -1  13  11 1638.05 9.11018   1
   7 -13 -10 2288.41 10.7185  -2
  -1  13  10 2288.41 10.7185   1
   6 -13  -9 687.821 6.12115  -2
  -1  13   9 687.821 6.12115   1
   8 -13  -9 2981.63 12.0666  -2
   1  13   9 2981.63 12.0666   1
   1  13  10 8454.80 21.7606   1
  10 -13 -12 177.378 2.84956  -2
   1  13  12 177.378 2.84956   1
   2   0 -23 1755.13 10.1002   1
   2   0 -22 508.371 5.60412   1
 -14   0  21 152.104 3.45078  -2
   2   0 -21 152.104 3.45078   1
 -13   0  20 917.835 8.87801  -2
   2   0 -20 917.835 8.87801   1
   2   0 -19 3176.17 12.5358   1
   2   0 -18 270.857 4.26346   1
  11   0 -17 134.461 1.85290  -2
  -2   0  17 134.461 1.85290   1
  10   0 -16 65145.7 29.6932  -2
  -2   0  16 65145.7 29.6932   1
   2   0 -15 64426.4 22.2879   1
  -2   0  14 55719.9 19.7696   1
   2   0 -13 45413.6 32.9828   1
  -8   0  13 48339.3 13.7222  -2
   2   0 -13 48339.3 13.7222   1
  -7   0  12 20262.0 10.6725  -2
   2   0 -12 20262.0 10.6725   1
  -2   0  11 8996.83 5.20411   1
  -2   0  10 24626.4 8.10877   1
   2   0  -9 11575.0 5.20154   1
  -4   0   8 3495.42 3.89959  -2
   2   0  -8 3495.42 3.89959   1
   2   0  -7 12165.3 5.91587   1
  -2   0   6 493290. 52.5215   1
  -2   0   5 472.358 3.19902   1
   1   0  -4 35111.5 9.83884  -2
  -2   0   4 35111.5 9.83884   1
   2   0  -3 115035. 17.8616   1
  -2   0   2 2503.23 1.19586   1
   2   0  -1 49.9667 1.25543   1
   2   0   0 581.645 3.33100  -2
   2   0   0 581.645 3.33100   1
   2   0   1 2430.60 2.31310   1
   2   0   2 95901.7 9.51820   1
   2   0   3 22765.9 6.46751   1
  -5   0   4 9233.36 5.92938  -2
  -2   0  -4 9233.36 5.92938   1
   2   0   5 517328. 38.8554   1
  -2   0  -6 20358.1 7.50011   1
  -2   0  -7 204.650 1.42690   1
   8   0  -8 7291.61 5.26387  -2
   2   0   8 7291.61 5.26387   1
   2   0   9 1087.92 1.74666   1
  -2   0 -10 2179.76 2.57483   1
   2   0  11 3761.81 3.57047   1
 -11   0  12 80209.0 21.6739  -2
  -2   0 -12 80209.0 21.6739   1
  -2   0 -13 12016.7 15.6463   1
  12   0 -13 18947.3 9.24371  -2
   2   0  13 18947.3 9.24371   1
  -2   0 -14 40361.5 20.1141   1
  -2   0 -15 43855.1 29.2095   1
 -14   0  16 15183.6 30.5826  -2
  -2   0 -16 15183.6 30.5826   1
 -15   0  17 8647.80 19.3976  -2
  -2   0 -17 8647.80 19.3976   1
  -2   0 -18 162.614 3.62116   1
  -2   0 -19 14.6857 2.20275   1
 -17   0  20 2450.85 14.3535  -2
  -2   0 -20 2450.85 14.3535   1
 -18   0  21 2391.49 11.4771  -2
  -2   0 -21 2391.49 11.4771   1
  -2   0 -22 912.831 7.21867   1
   2  -1 -23-1.47887 1.40416   1
   2   1 -22 2.98398 1.40459   1
 -14   1  21 3.43273 1.90649  -2
   2  -1 -21 3.43273 1.90649   1
 -13   1  20 6222.97 15.2791  -2
   2  -1 -20 6222.97 15.2791   1
   2   1 -19-4.61662 1.14289   1
  -2  -1  18 4.52762 0.92496   1
 -11   1  17 107.157 1.27647  -2
   2  -1 -17 107.157 1.27647   1
 -10   1  16-2.58835 0.82082  -2
   2  -1 -16-2.58835 0.82082   1
   2   1 -15 3.92667 0.43381   1
   2  -1 -14 4.32181 0.32177   1
  -2   1  13-0.47979 0.62485   1
  -8   1  13 3.34940 0.53583  -2
   2  -1 -13 3.34940 0.53583   1
   7  -1 -12 1402.41 2.13740  -2
  -2   1  12 1402.41 2.13740   1
  -2   1  11 0.23156 0.29749   1
   2  -1 -10 1.33120 0.29256   1
   2   1  -9-0.64259 0.26006   1
  -5   1   9 101.740 1.70192  -2
   2  -1  -9 101.740 1.70192   1
  -4  -1   8 3.57814 0.35854  -2
   2   1  -8 3.57814 0.35854   1
  -2  -1   7 1.61340 0.27958   1
  -2  -1   6 0.01429 0.29095   1
  -2  -1   5 0.03540 0.25076   1
   1   1  -4 64.6707 0.58736  -2
  -2  -1   4 64.6707 0.58736   1
  -2  -1   3 0.08217 0.32755   1
  -2  -1   2 0.21916 0.21507   1
   2  -1  -1 0.92001 0.13820   1
  -2  -1   0 0.69577 0.19329  -2
  -2   1   0 0.69577 0.19329   1
   2   1   1-0.10179 0.20505   1
   2   1   2 0.38505 0.30486   1
  -2   1  -3 0.83294 0.21446   1
   5  -1  -4 550.103 1.05807  -2
   2   1   4 550.103 1.05807   1
  -2  -1  -5-0.28012 0.31250   1
  -2   1  -6 0.09634 0.27803   1
  -2  -1  -7 0.56314 0.29206   1
   8   1  -8 1.21287 0.36218  -2
   2  -1   8 1.21287 0.36218   1
   2   1   9 2.13576 0.28156   1
  -9  -1   9 1128.40 3.30274  -2
  -2   1  -9 1128.40 3.30274   1
  -2   1 -10 1.11076 0.26859   1
   2   1  11 0.57103 0.29173   1
 -11  -1  12 2.89138 0.37909  -2
  -2   1 -12 2.89138 0.37909   1
 -12  -1  13-2.20439 0.52187  -2
  -2   1 -13-2.20439 0.52187   1
  -2  -1 -14 0.95202 0.43478   1
   2  -1  15 2.23944 0.79689   1
  13  -1 -15 1566.67 5.17043  -2
   2   1  15 1566.67 5.17043   1
 -14  -1  16 23.1186 1.08928  -2
  -2   1 -16 23.1186 1.08928   1
 -15   1  17 523.875 3.89719  -2
  -2  -1 -17 523.875 3.89719   1
  -2  -1 -18 0.22710 1.56267   1
  -2   1 -19 1.16135 1.61422   1
 -17   1  20 50.9047 2.34133  -2
  -2  -1 -20 50.9047 2.34133   1
 -18  -1  21-8.33452 1.67593  -2
  -2   1 -21-8.33452 1.67593   1
  -2  -1 -22-9.40761 1.52585   1
   2  -2 -23 1029.09 5.43971   1
   2   2 -22 99.2548 1.86130   1
 -14  -2  21 3781.19 10.0232  -2
   2   2 -21 3781.19 10.0232   1
  13   2 -20 13938.4 18.0805  -2
  -2  -2  20 13938.4 18.0805   1
  -2  -2  19 22731.7 18.4024   1
   2  -2 -18 418.400 2.62645   1
  11  -2 -17 97.9064 1.41085  -2
  -2   2  17 97.9064 1.41085   1
  10   2 -16 89.7616 1.27767  -2
  -2  -2  16 89.7616 1.27767   1
   2   2 -15 12216.2 6.94021   1
  -2   2  14 15763.1 7.11810   1
   2   2 -13 6666.68 12.4435   1
  -8  -2  13 7879.57 4.85982  -2
   2   2 -13 7879.57 4.85982   1
  -7  -2  12 474.579 1.44124  -2
   2   2 -12 474.579 1.44124   1
  -2   2  11 108636. 14.9585   1
   2  -2 -10 41061.1 7.80072   1
   2  -2  -9 49.3820 0.61663   1
  -5   2   9 40.6531 0.66674  -2
   2  -2  -9 40.6531 0.66674   1
  -4   2   8 60779.6 11.2577  -2
   2  -2  -8 60779.6 11.2577   1
   2  -2  -7 3937.80 2.06375   1
   2   2  -6 166.268 0.52185   1
  -2   2   5 1110.65 1.89986   1
   1   2  -4 23002.0 7.38800  -2
  -2  -2   4 23002.0 7.38800   1
  -2  -2   3 767.304 1.87164   1
   2  -2  -2 35834.0 9.11210   1
   2   2  -1 50397.7 5.88536   1
   2   2   0 111352. 13.9272  -2
   2  -2   0 111352. 13.9272   1
   2  -2   1 52650.0 4.92146   1
  -2  -2  -2 3558.90 2.12762   1
  -2   2  -3 17175.9 3.96095   1
   5  -2  -4 8.12988 12.7787  -2
   2   2   4 8.12988 12.7787   1
   2   2   5 1455.39 1.49871   1
   2   2   6 3239.44 1.92992   1
  -2  -2  -7 42043.5 7.36777   1
   8  -2  -8 1579.55 2.03662  -2
   2   2   8 1579.55 2.03662   1
  -2   2  -9 90010.0 18.6964   1
   9   2  -9 87607.3 16.5931  -2
   2  -2   9 87607.3 16.5931   1
  -2   2 -10 155479. 17.2273   1
   2  -2  11 4850.55 3.50697   1
  11  -2 -12 648.628 1.98405  -2
   2   2  12 648.628 1.98405   1
 -12   2  13 5101.01 4.13968  -2
  -2  -2 -13 5101.01 4.13968   1
  -2   2 -14 3877.49 3.93185   1
   2  -2  15 54.4211 0.65314   1
  14  -2 -16 1388.62 4.77032  -2
   2   2  16 1388.62 4.77032   1
 -15  -2  17 273.814 2.22129  -2
  -2   2 -17 273.814 2.22129   1
   2  -2  18 18353.2 16.3746   1
  -2   2 -19 16203.2 20.4513   1
 -17  -2  20 85.4664 2.52897  -2
  -2   2 -20 85.4664 2.52897   1
 -18   2  21 2607.68 8.40433  -2
  -2  -2 -21 2607.68 8.40433   1
  -2   2 -22 7338.72 14.5744   1
   2  -3 -23 37.6771 1.51837   1
   2  -3 -22 8.69695 1.06501   1
  14   3 -21 18.8600 1.41248  -2
  -2  -3  21 18.8600 1.41248   1
 -13  -3  20 9580.77 15.6912  -2
   2   3 -20 9580.77 15.6912   1
   2  -3 -19-0.62048 0.89099   1
   2   3 -18 1.53990 0.90612   1
 -11  -3  17 385.023 2.25277  -2
   2   3 -17 385.023 2.25277   1
 -10  -3  16 1.63519 1.03640  -2
   2   3 -16 1.63519 1.03640   1
   2  -3 -15 3.49263 0.50532   1
   2  -3 -14 0.27004 0.48233   1
   8   3 -13 3.46500 0.61907  -2
  -2  -3  13 3.46500 0.61907   1
  -7  -3  12 4180.40 4.40602  -2
   2   3 -12 4180.40 4.40602   1
   2  -3 -11 0.11322 0.40503   1
   2  -3 -10 1.82232 0.40223   1
   2  -3  -9 4.31883 0.44774   1
  -5   3   9 842.389 3.82876  -2
   2  -3  -9 842.389 3.82876   1
   4   3  -8 1.20828 0.44814  -2
  -2  -3   8 1.20828 0.44814   1
   2  -3  -7 1.27867 0.16001   1
  -2  -3   6 2.46602 0.31305   1
   2   3  -5 0.07080 0.30127   1
  -1   3   4 97.4338 0.70605  -2
   2  -3  -4 97.4338 0.70605   1
  -2   3   3 0.81674 0.18698   1
  -2   3   2 0.22717 0.15363   1
   2  -3  -1 0.19857 0.19000   1
   2   3   0 0.41751 0.19575  -2
   2  -3   0 0.41751 0.19575   1
   2   3   1 0.19748 0.17662   1
  -2  -3  -2-0.37376 0.21393   1
   2  -3   3 0.30919 0.20163   1
  -5   3   4 3317.86 2.41221  -2
  -2  -3  -4 3317.86 2.41221   1
   2  -3   5 1.25347 0.23281   1
  -6   3   5-2.81267 1.16946  -2
  -2  -3  -5-2.81267 1.16946   1
  -2   3  -6 1.45425 0.24990   1
   2  -3   7 1.01184 0.27843   1
  -8   3   8 0.87911 0.39253  -2
  -2  -3  -8 0.87911 0.39253   1
  -2   3  -9 0.12830 0.33477   1
   9   3  -9 248.788 1.94351  -2
   2  -3   9 248.788 1.94351   1
  -2   3 -10-2.08187 0.48235   1
   2   3  11 1.71086 0.48058   1
 -11   3  12 431.742 1.70665  -2
  -2  -3 -12 431.742 1.70665   1
  12   3 -13 1.24961 0.62589  -2
   2  -3  13 1.24961 0.62589   1
  -2  -3 -14 3.10372 0.44620   1
  -2  -3 -15 5.34863 0.56335   1
  13  -3 -15 210.259 3.37837  -2
   2   3  15 210.259 3.37837   1
  14  -3 -16 3.85161 1.14263  -2
   2   3  16 3.85161 1.14263   1
  15   3 -17 8.25993 1.15035  -2
   2  -3  17 8.25993 1.15035   1
   2  -3  18 5.40855 0.90873   1
  -2   3 -19 0.39325 1.52792   1
  16   3 -19-12.3936 1.92369  -2
   2  -3  19-12.3936 1.92369   1
 -17  -3  20 63.1237 1.54609  -2
  -2   3 -20 63.1237 1.54609   1
 -18   3  21 0.46735 2.50505  -2
  -2  -3 -21 0.46735 2.50505   1
  -2   3 -22 7.32109 1.43822   1
  -2  -4  22 9.91018 1.12952   1
  14   4 -21 36.5093 1.38258  -2
  -2  -4  21 36.5093 1.38258   1
 -13  -4  20 2955.74 9.04903  -2
   2   4 -20 2955.74 9.04903   1
  -2  -4  19 7174.11 10.6415   1
  12  -4 -19 7779.05 18.1225  -2
  -2   4  19 7779.05 18.1225   1
  -2   4  18 228.193 1.84503   1
 -11  -4  17 156.495 2.01444  -2
   2   4 -17 156.495 2.01444   1
 -10   4  16 36994.5 19.6079  -2
   2  -4 -16 36994.5 19.6079   1
   2  -4 -15 31466.5 12.7722   1
  -9  -4  15 31958.8 29.6948  -2
   2   4 -15 31958.8 29.6948   1
   2  -4 -14 37872.5 12.2786   1
  -8  -4  13 17374.7 7.56021  -2
   2   4 -13 17374.7 7.56021   1
   7   4 -12 17330.4 9.96076  -2
  -2  -4  12 17330.4 9.96076   1
   2   4 -11 340.970 1.03262   1
   2   4 -10 6037.91 3.81337   1
  -2  -4   9 6305.14 4.27423   1
   5   4  -9 5973.01 6.90422  -2
  -2  -4   9 5973.01 6.90422   1
  -4   4   8 1437.64 2.20915  -2
   2  -4  -8 1437.64 2.20915   1
  -2  -4   7 5023.00 2.92998   1
  -2  -4   6 203025. 17.5054   1
   2   4  -5 181.898 0.60157   1
  -1  -4   4 10112.1 3.28985  -2
   2   4  -4 10112.1 3.28985   1
  -2  -4   3 56033.5 8.03325   1
   2   4  -2 789.913 1.25214   1
   2  -4  -1 6322.27 2.56444   1
   2  -4   0 18029.2 5.27557  -2
   2   4   0 18029.2 5.27557   1
  -2  -4  -1 2473.32 1.88376   1
   2   4   2 36171.9 7.30056   1
  -2  -4  -3 3680.48 1.94144   1
   5   4  -4 6525.35 3.37885  -2
   2  -4   4 6525.35 3.37885   1
  -2   4  -5 216874. 16.3772   1
  -6   4   5 280180. 60.2711  -2
  -2  -4  -5 280180. 60.2711   1
  -2  -4  -6 3804.80 2.20674   1
  -2   4  -7 7071.77 3.17614   1
  -8   4   8 2550.83 2.97286  -2
  -2  -4  -8 2550.83 2.97286   1
  -2  -4  -9 4875.84 7.37362   1
   9   4  -9 4592.79 3.93982  -2
   2  -4   9 4592.79 3.93982   1
   2   4  10 16589.8 7.57020   1
  -2   4 -11 1563.27 2.68930   1
 -11   4  12 41462.4 16.0880  -2
  -2  -4 -12 41462.4 16.0880   1
 -12   4  13 9174.13 5.87348  -2
  -2  -4 -13 9174.13 5.87348   1
  -2  -4 -14 20489.3 9.53743   1
   2   4  15 28610.5 13.3288   1
 -14  -4  16 7712.33 11.5389  -2
  -2   4 -16 7712.33 11.5389   1
  15   4 -17 3531.57 6.20001  -2
   2  -4  17 3531.57 6.20001   1
   2   4  18 1757.73 4.64189   1
  -2  -4 -19 1167.64 5.59069   1
  16  -4 -19 1213.84 7.35210  -2
   2   4  19 1213.84 7.35210   1
 -17  -4  20 892.718 9.18164  -2
  -2   4 -20 892.718 9.18164   1
  18   4 -21 532.660 3.04720  -2
   2  -4  21 532.660 3.04720   1
   2  -5 -22 2.75095 1.15660   1
 -14  -5  21-4.30297 1.85718  -2
   2   5 -21-4.30297 1.85718   1
  13  -5 -20 3076.56 8.97264  -2
  -2   5  20 3076.56 8.97264   1
   2  -5 -19-9.90474 1.08984   1
  12  -5 -19-2.68170 1.52248  -2
  -2   5  19-2.68170 1.52248   1
   2  -5 -18 3.12844 0.80489   1
 -11   5  17 20.4517 1.40489  -2
   2  -5 -17 20.4517 1.40489   1
 -10  -5  16 8.08651 1.16350  -2
   2   5 -16 8.08651 1.16350   1
  -2  -5  15 2.06591 0.80267   1
  -9  -5  15 10940.3 17.8289  -2
   2   5 -15 10940.3 17.8289   1
   2   5 -14-1.24749 0.50492   1
  -8  -5  13 8.53163 0.74903  -2
   2   5 -13 8.53163 0.74903   1
  -7  -5  12 219.167 1.34049  -2
   2   5 -12 219.167 1.34049   1
   2  -5 -11 2.37328 0.47267   1
   2   5 -10 1.14204 0.43616   1
   2   5  -9 1.97621 0.54056   1
   5   5  -9 984.167 2.03599  -2
  -2  -5   9 984.167 2.03599   1
   4  -5  -8-0.33970 0.40950  -2
  -2   5   8-0.33970 0.40950   1
   2  -5  -7 0.05450 0.37006   1
  -2   5   6 0.95661 0.31529   1
  -2  -5   5 0.90516 0.27838   1
   1   5  -4 10.1305 0.29956  -2
  -2  -5   4 10.1305 0.29956   1
   2  -5  -3-0.13485 0.23116   1
   2   5  -2 0.28046 0.19156   1
   2  -5  -1 0.40871 0.22777   1
   2   5   0 0.57167 0.27388  -2
   2  -5   0 0.57167 0.27388   1
   2  -5   1 1.07246 0.25632   1
  -2  -5  -2-0.22854 0.24024   1
  -2   5  -3 0.02970 0.23883   1
  -5  -5   4 16.2653 0.36641  -2
  -2   5  -4 16.2653 0.36641   1
  -2  -5  -5 0.22391 0.26845   1
  -6   5   5 0.04724 1.61578  -2
  -2  -5  -5 0.04724 1.61578   1
  -2  -5  -6 0.40600 0.30428   1
  -2  -5  -7 0.66726 0.42072   1
   8  -5  -8 2.15897 0.55404  -2
   2   5   8 2.15897 0.55404   1
  -2   5  -9 0.88588 0.76837   1
  -9   5   9 1054.30 2.29152  -2
  -2  -5  -9 1054.30 2.29152   1
  -2  -5 -10 1.89869 0.47587   1
  -2  -5 -11 4.47887 0.49133   1
 -11  -5  12 220.020 1.36952  -2
  -2   5 -12 220.020 1.36952   1
 -12   5  13-2.69439 0.65763  -2
  -2  -5 -13-2.69439 0.65763   1
   2  -5  14-0.37568 0.56679   1
   2   5  15-1.94483 1.27429   1
  13   5 -15 5425.67 13.5791  -2
   2  -5  15 5425.67 13.5791   1
 -14   5  16-0.58804 1.38360  -2
  -2  -5 -16-0.58804 1.38360   1
  15  -5 -17 1497.14 4.38747  -2
   2   5  17 1497.14 4.38747   1
   2   5  18 7.07528 0.82887   1
  -2   5 -19 3.63565 1.30907   1
  16   5 -19 4.67158 1.75515  -2
   2  -5  19 4.67158 1.75515   1
 -17  -5  20 322.922 2.58624  -2
  -2   5 -20 322.922 2.58624   1
 -18   5  21 5.74855 1.47543  -2
  -2  -5 -21 5.74855 1.47543   1
  14  -6 -21 1992.28 5.25021  -2
  -2   6  21 1992.28 5.25021   1
 -13  -6  20 4156.52 9.41965  -2
   2   6 -20 4156.52 9.41965   1
   2  -6 -19 6690.65 10.5383   1
  12  -6 -19 7668.42 19.5016  -2
  -2   6  19 7668.42 19.5016   1
  -2   6  18 913.407 3.41799   1
  11   6 -17 943.828 3.80486  -2
  -2  -6  17 943.828 3.80486   1
 -10  -6  16 5265.43 9.60080  -2
   2   6 -16 5265.43 9.60080   1
   2  -6 -15 29825.1 17.0576   1
   2  -6 -14 16811.3 10.2629   1
  -8   6  13 621.589 1.82018  -2
   2  -6 -13 621.589 1.82018   1
  -7   6  12 1047.92 2.96370  -2
   2  -6 -12 1047.92 2.96370   1
   2  -6 -11 19908.5 8.99566   1
   2   6 -10 4752.16 4.24559   1
  -2  -6   9 395.775 1.55978   1
  -5   6   9 425.711 1.83651  -2
   2  -6  -9 425.711 1.83651   1
  -4   6   8 7574.51 5.38304  -2
   2  -6  -8 7574.51 5.38304   1
   2   6  -7 5632.34 3.57473   1
   2   6  -6 35647.9 8.03904   1
  -2   6   5 548.877 1.10917   1
  -2   6   5 608.603 3.43273  -2
   2  -6  -5 608.603 3.43273   1
  -1   6   4 39342.6 9.12848  -2
   2  -6  -4 39342.6 9.12848   1
  -2   6   3 1467.09 1.30413   1
  -2  -6   2 3779.08 2.25510   1
   2  -6  -1 2829.05 1.84785   1
   2   6   0 5090.24 2.88148  -2
   2  -6   0 5090.24 2.88148   1
  -2  -6  -1 4136.15 2.19513   1
   2  -6   2 12680.0 4.09365   1
   2   6   3 38292.2 7.00662   1
  -5   6   4 5493.21 3.46888  -2
  -2  -6  -4 5493.21 3.46888   1
  -2  -6  -5 51054.5 9.48289   1
  -2  -6  -6 16119.6 6.27173   1
   2  -6   7 2583.57 2.68042   1
  -8  -6   8 3440.64 4.22206  -2
  -2   6  -8 3440.64 4.22206   1
  -2  -6  -9 39882.9 31.4363   1
   9   6  -9 39840.9 11.5608  -2
   2  -6   9 39840.9 11.5608   1
   2  -6  10 50897.7 14.2757   1
   2   6  11 1293.15 2.42815   1
 -11  -6  12 8961.14 7.99136  -2
  -2   6 -12 8961.14 7.99136   1
  12  -6 -13 709.522 2.01169  -2
   2   6  13 709.522 2.01169   1
  -2  -6 -14 14476.6 10.7231   1
  -2   6 -15 1464.44 5.71782   1
  13   6 -15 1434.62 5.62672  -2
   2  -6  15 1434.62 5.62672   1
  14  -6 -16 4042.03 8.84422  -2
   2   6  16 4042.03 8.84422   1
 -15  -6  17 3665.51 6.58668  -2
  -2   6 -17 3665.51 6.58668   1
  -2  -6 -18 3141.81 6.31927   1
  -2   6 -19 4089.32 10.3268   1
  16  -6 -19 4509.00 15.4658  -2
   2   6  19 4509.00 15.4658   1
 -17  -6  20 364.644 2.78229  -2
  -2   6 -20 364.644 2.78229   1
 -14  -7  21 10.3404 1.54679  -2
   2   7 -21 10.3404 1.54679   1
 -13  -7  20 8082.02 19.2474  -2
   2   7 -20 8082.02 19.2474   1
   2   7 -19-1.80650 2.02625   1
  12   7 -19 6.25328 1.71924  -2
  -2  -7  19 6.25328 1.71924   1
  -2  -7  18 4.48359 1.08647   1
 -11  -7  17 611.383 3.26889  -2
   2   7 -17 611.383 3.26889   1
 -10   7  16 9.65202 1.22990  -2
   2  -7 -16 9.65202 1.22990   1
   2  -7 -15-9.12827 1.04470   1
   2  -7 -14-6.14226 0.86375   1
   2  -7 -13 0.01702 1.14026   1
  -8  -7  13 4.45136 1.22484  -2
   2   7 -13 4.45136 1.22484   1
  -7   7  12 3313.81 5.27088  -2
   2  -7 -12 3313.81 5.27088   1
   2   7 -11 1.15011 0.53611   1
  -6   7  11 0.61150 2.53920  -2
   2  -7 -11 0.61150 2.53920   1
   2  -7 -10 5.62808 0.51550   1
  -2   7   9-6.41505 0.71463   1
  -5   7   9 769.118 2.42377  -2
   2  -7  -9 769.118 2.42377   1
   4   7  -8 2.33561 0.60048  -2
  -2  -7   8 2.33561 0.60048   1
   2  -7  -7-2.52404 0.41328   1
   2  -7  -6-1.00903 0.34465   1
   2  -7  -5-0.41897 0.35490   1
  -2   7   5-3.64596 1.71707  -2
   2  -7  -5-3.64596 1.71707   1
  -1  -7   4 128.599 0.80550  -2
   2   7  -4 128.599 0.80550   1
   2  -7  -3 0.82646 0.26876   1
   2   7  -2 0.71900 0.26740   1
  -2  -7   1-0.11321 0.25751   1
   2   7   0 1.59274 0.35132  -2
   2  -7   0 1.59274 0.35132   1
   2  -7   1-0.67535 0.28969   1
  -2  -7  -2-1.18235 0.28775   1
   2   7   3 1.09922 0.28476   1
   5   7  -4 1275.09 1.97562  -2
   2  -7   4 1275.09 1.97562   1
   2   7   5 1.60463 0.37681   1
   6   7  -5-0.20168 1.14610  -2
   2  -7   5-0.20168 1.14610   1
  -2   7  -6-0.87443 0.37574   1
   2  -7   7 0.12782 0.42012   1
  -8  -7   8 8.74458 0.64982  -2
  -2   7  -8 8.74458 0.64982   1
  -2  -7  -9-5.55799 1.64484   1
  -9   7   9 330.932 1.36625  -2
  -2  -7  -9 330.932 1.36625   1
   2   7  10-1.72879 0.50017   1
   2  -7  11 1.63572 0.56136   1
  11  -7 -12 461.247 2.55337  -2
   2   7  12 461.247 2.55337   1
  12  -7 -13 5.25660 1.30291  -2
   2   7  13 5.25660 1.30291   1
   2   7  14-0.89101 0.99751   1
  -2  -7 -15 7.81929 1.27591   1
  13  -7 -15 737.437 4.42470  -2
   2   7  15 737.437 4.42470   1
  14   7 -16-0.63573 1.15895  -2
   2  -7  16-0.63573 1.15895   1
 -15   7  17 12.1263 1.19157  -2
  -2  -7 -17 12.1263 1.19157   1
  -2  -7 -18 2.92916 1.02288   1
  16  -7 -18 0.03432 2.80476  -2
   2   7  18 0.03432 2.80476   1
  -2  -7 -19 9.62308 1.50471   1
  16   7 -19 7.77577 1.88894  -2
   2  -7  19 7.77577 1.88894   1
  17   7 -20 117.505 2.19033  -2
   2  -7  20 117.505 2.19033   1
 -13  -8  20 8656.46 16.4965  -2
   2   8 -20 8656.46 16.4965   1
   2   8 -19 16167.2 21.0460   1
  12  -8 -19 18505.8 31.6362  -2
  -2   8  19 18505.8 31.6362   1
  -2  -8  18 2775.77 8.53971   1
  12  -8 -18 3196.31 13.2420  -2
  -2   8  18 3196.31 13.2420   1
  11  -8 -17 1594.82 5.31984  -2
  -2   8  17 1594.82 5.31984   1
  10   8 -16 6707.64 16.5638  -2
  -2  -8  16 6707.64 16.5638   1
  -2  -8  15 3124.75 8.51381   1
  -9   8  15 3095.16 12.0203  -2
   2  -8 -15 3095.16 12.0203   1
   2   8 -14 15646.4 15.1545   1
   8   8 -13 48.4746 1.84272  -2
  -2  -8  13 48.4746 1.84272   1
  -7   8  12 9677.96 14.7814  -2
   2  -8 -12 9677.96 14.7814   1
  -2   8  11 27829.0 11.5164   1
   2  -8 -10 1241.51 2.42377   1
   2  -8  -9 2203.08 7.04910   1
   5  -8  -9 2311.86 3.66156  -2
  -2   8   9 2311.86 3.66156   1
   4  -8  -8 16570.6 10.4189  -2
  -2   8   8 16570.6 10.4189   1
  -2   8   7 744.538 1.67373   1
   2  -8  -6 37371.3 10.9098   1
  -2   8   5 203.830 1.76392   1
  -2   8   5 194.955 1.44611  -2
   2  -8  -5 194.955 1.44611   1
   1   8  -4 92.4965 0.70328  -2
  -2  -8   4 92.4965 0.70328   1
   2   8  -3 22022.2 7.48589   1
   0   8   3 27786.8 22.4918  -2
   2  -8  -3 27786.8 22.4918   1
  -2  -8   2 7467.97 4.31602   1
   2  -8  -1 21412.1 7.21440   1
  -2   8   0 57280.6 12.5653  -2
  -2  -8   0 57280.6 12.5653   1
   2  -8   1 15540.2 5.72746   1
  -2  -8  -2 4958.73 3.34151   1
  -2  -8  -3 1369.53 2.42566   1
   4   8  -3 1422.14 5.03868  -2
   2  -8   3 1422.14 5.03868   1
  -5   8   4 2607.39 3.61624  -2
  -2  -8  -4 2607.39 3.61624   1
  -2   8  -5 31155.6 15.3446   1
  -6  -8   5 37999.2 16.6182  -2
  -2   8  -5 37999.2 16.6182   1
  -2  -8  -6 1148.21 2.26283   1
  -2   8  -7 25435.4 11.6340   1
  -7   8   7 25750.6 25.4370  -2
  -2  -8  -7 25750.6 25.4370   1
  -8  -8   8 267.485 1.83602  -2
  -2   8  -8 267.485 1.83602   1
  -2  -8  -9 12175.2 19.6622   1
  -9  -8   9 11177.9 8.61456  -2
  -2   8  -9 11177.9 8.61456   1
   2  -8  10 54155.3 18.6680   1
  -2  -8 -11 47.3201 1.12157   1
  11   8 -12 4892.89 9.11927  -2
   2  -8  12 4892.89 9.11927   1
  12   8 -13 1044.67 3.46042  -2
   2  -8  13 1044.67 3.46042   1
  -2  -8 -14 2277.89 5.09623   1
  -2  -8 -15 9297.64 14.3573   1
  13  -8 -15 7566.04 13.1653  -2
   2   8  15 7566.04 13.1653   1
  14  -8 -16 1151.34 7.31811  -2
   2   8  16 1151.34 7.31811   1
 -15   8  17 80.6251 1.39180  -2
  -2  -8 -17 80.6251 1.39180   1
   2   8  18 12112.2 12.6546   1
  -2   8 -19 6337.07 12.7076   1
  16   8 -19 7470.89 13.9602  -2
   2  -8  19 7470.89 13.9602   1
   2   9 -19 10.0421 1.38337   1
   2   9 -18-7.57573 1.17512   1
 -11  -9  17 7.88138 1.69536  -2
   2   9 -17 7.88138 1.69536   1
 -10  -9  16 19.3544 2.65160  -2
   2   9 -16 19.3544 2.65160   1
   2   9 -15 10.0456 1.33737   1
   2   9 -14 3.09682 1.15649   1
   8   9 -13 2.16886 1.54733  -2
  -2  -9  13 2.16886 1.54733   1
  -7   9  12 376.910 3.43702  -2
   2  -9 -12 376.910 3.43702   1
   2   9 -11 1.34529 1.34525   1
  -6   9  11 4.61268 2.82531  -2
   2  -9 -11 4.61268 2.82531   1
  -2  -9  10 3.85159 1.13701   1
  -5   9   9 199.259 1.46380  -2
   2  -9  -9 199.259 1.46380   1
  -4   9   8 1.66304 0.98571  -2
   2  -9  -8 1.66304 0.98571   1
  -2  -9   7 0.81789 1.05381   1
   3   9  -7 370.914 2.62747  -2
  -2  -9   7 370.914 2.62747   1
   2  -9  -6 1.91993 0.60256   1
  -2  -9   5-1.97956 0.77236   1
   2   9  -5 0.18983 1.00065  -2
  -2  -9   5 0.18983 1.00065   1
  -1   9   4 17.2487 0.66929  -2
   2  -9  -4 17.2487 0.66929   1
  -2  -9   3 5.30962 0.64715   1
   0   9   3 16.5154 1.40109  -2
   2  -9  -3 16.5154 1.40109   1
   2  -9  -2 1.93303 0.44760   1
  -2  -9   1-2.41154 0.51480   1
  -2   9   0 1.41804 0.84056  -2
  -2  -9   0 1.41804 0.84056   1
  -2  -9  -1-4.29654 0.48532   1
   2   9   2-3.58385 0.44280   1
  -2   9  -3 1.45597 0.55618   1
   4   9  -3 4.11557 1.27778  -2
   2  -9   3 4.11557 1.27778   1
   5  -9  -4 198.361 1.68387  -2
   2   9   4 198.361 1.68387   1
  -2  -9  -5-9.19640 1.25879   1
  -6  -9   5 7.21711 0.82412  -2
  -2   9  -5 7.21711 0.82412   1
  -2  -9  -6 3.48391 0.58337   1
  -2  -9  -7-0.20591 0.67882   1
   7   9  -7 2821.03 8.78656  -2
   2  -9   7 2821.03 8.78656   1
  -8   9   8 3.68626 0.74032  -2
  -2  -9  -8 3.68626 0.74032   1
   9   9  -9 120.383 1.39461  -2
   2  -9   9 120.383 1.39461   1
  -2   9 -10-3.87785 0.81233   1
  -2   9 -11 1.93475 1.05297   1
  10  -9 -11 2.87048 1.75516  -2
   2   9  11 2.87048 1.75516   1
 -11   9  12 55.4123 1.36893  -2
  -2  -9 -12 55.4123 1.36893   1
 -12  -9  13-1.35979 1.13610  -2
  -2   9 -13-1.35979 1.13610   1
   2   9  14 4.62794 0.85108   1
  -2  -9 -15 6.08488 1.23916   1
  13   9 -15 3342.79 8.99864  -2
   2  -9  15 3342.79 8.99864   1
 -14  -9  16 3.79824 1.12243  -2
  -2   9 -16 3.79824 1.12243   1
  15   9 -17 430.627 2.95716  -2
   2  -9  17 430.627 2.95716   1
  -2   9 -18-0.22089 1.11296   1
  16  -9 -18 6.02983 3.10060  -2
   2   9  18 6.02983 3.10060   1
   2  10 -18 3907.41 10.3372   1
  12 -10 -18 4175.39 15.7695  -2
  -2  10  18 4175.39 15.7695   1
  11  10 -17 1598.49 5.74052  -2
  -2 -10  17 1598.49 5.74052   1
  10 -10 -16 14678.1 21.3757  -2
  -2  10  16 14678.1 21.3757   1
   2  10 -15 38723.0 43.9896   1
   9  10 -15 39334.7 40.6509  -2
  -2 -10  15 39334.7 40.6509   1
  -2 -10  14 14766.1 18.5880   1
   8  10 -13 9186.96 12.3933  -2
  -2 -10  13 9186.96 12.3933   1
  -7  10  12 831.894 4.82680  -2
   2 -10 -12 831.894 4.82680   1
   2  10 -11 87.3256 2.78101   1
  -6  10  11 422.943 3.24607  -2
   2 -10 -11 422.943 3.24607   1
   2 -10 -10 380.839 2.45976   1
  -5  10   9 409.413 2.47630  -2
   2 -10  -9 409.413 2.47630   1
  -4  10   8 169.951 1.69012  -2
   2 -10  -8 169.951 1.69012   1
   2 -10  -7 5373.62 13.0992   1
   3  10  -7 5521.76 8.78791  -2
  -2 -10   7 5521.76 8.78791   1
   2 -10  -6 62553.1 19.2264   1
  -2 -10   5 96.2702 1.50165   1
  -2  10   5 68.5182 1.40087  -2
   2 -10  -5 68.5182 1.40087   1
   1  10  -4 23648.3 17.3250  -2
  -2 -10   4 23648.3 17.3250   1
  -2  10   3 2748.56 6.16439   1
   0  10  -3 3736.85 9.40068  -2
  -2 -10   3 3736.85 9.40068   1
  -2 -10   2 59.4247 1.15833   1
   2  10  -1 643.693 2.96672   1
  -2  10   0 3042.07 6.17626  -2
  -2 -10   0 3042.07 6.17626   1
   2  10   1 130.700 1.53762   1
  -2 -10  -2 14428.3 13.9214   1
  -2  10  -3 26549.6 15.5056   1
   4 -10  -3 33163.7 29.9323  -2
   2  10   3 33163.7 29.9323   1
   5 -10  -4 2381.93 4.93705  -2
   2  10   4 2381.93 4.93705   1
  -2 -10  -5 88348.0 36.2805   1
   6 -10  -5 111020. 31.6618  -2
   2  10   5 111020. 31.6618   1
   2  10   6 18538.9 10.6922   1
  -2  10  -7 611.221 3.17732   1
   7 -10  -7 604.666 3.35243  -2
   2  10   7 604.666 3.35243   1
  -8  10   8 3216.59 6.98182  -2
  -2 -10  -8 3216.59 6.98182   1
  -2 -10  -9 8759.07 16.6097   1
  -9 -10   9 8277.04 9.96634  -2
  -2  10  -9 8277.04 9.96634   1
   2 -10  10 2787.50 5.22170   1
   2  10  11 149.773 1.54483   1
  10  10 -11 261.180 3.82829  -2
   2 -10  11 261.180 3.82829   1
 -11 -10  12 13872.5 18.9271  -2
  -2  10 -12 13872.5 18.9271   1
 -12  10  13 2636.18 6.33094  -2
  -2 -10 -13 2636.18 6.33094   1
   2  10  14 21156.8 15.7384   1
  -2  10 -15 4540.32 14.9332   1
  13  10 -15 4828.15 11.1406  -2
   2 -10  15 4828.15 11.1406   1
  14  10 -16 5564.08 16.4918  -2
   2 -10  16 5564.08 16.4918   1
  15  10 -17 7479.09 15.0049  -2
   2 -10  17 7479.09 15.0049   1
 -10 -11  16 11.6199 2.60202  -2
   2  11 -16 11.6199 2.60202   1
   2  11 -15 6.00420 2.00664   1
   9  11 -15 4877.51 11.0484  -2
  -2 -11  15 4877.51 11.0484   1
   2  11 -14 7.65558 1.02311   1
   8  11 -13 19.0493 1.67586  -2
  -2 -11  13 19.0493 1.67586   1
   7  11 -12 933.734 6.15033  -2
  -2 -11  12 933.734 6.15033   1
   2  11 -11-2.69161 1.62975   1
  -6  11  11 4.13403 1.34950  -2
   2 -11 -11 4.13403 1.34950   1
   2 -11 -10 3.66815 0.96375   1
  -5  11   9 38.9647 1.29266  -2
   2 -11  -9 38.9647 1.29266   1
  -4 -11   8 13.6842 1.13578  -2
   2  11  -8 13.6842 1.13578   1
   2  11  -7-15.7442 1.65713   1
  -3  11   7 86.9238 2.30492  -2
   2 -11  -7 86.9238 2.30492   1
  -2 -11   6-0.00733 1.05108   1
  -2 -11   5-21.0853 1.70683   1
  -2  11   5 29.1746 1.79465  -2
   2 -11  -5 29.1746 1.79465   1
   1  11  -4 123.043 1.64155  -2
  -2 -11   4 123.043 1.64155   1
  -2 -11   3-1.94898 1.46913   1
  -2 -11   2-1.83701 1.35973   1
  -2 -11   1-2.06132 1.24108   1
  -2  11   0 14.7345 1.79369  -2
  -2 -11   0 14.7345 1.79369   1
  -2 -11  -1 10.4679 1.33279   1
  -2 -11  -2 9.98275 0.91681   1
  -2 -11  -3 3.75689 0.93280   1
  -5  11   4 24.7211 1.71738  -2
  -2 -11  -4 24.7211 1.71738   1
  -2 -11  -5 8.19813 1.05536   1
   6 -11  -5 16.2081 1.21309  -2
   2  11   5 16.2081 1.21309   1
   2  11   6 2.21140 0.67468   1
  -2 -11  -7 4.36879 1.22313   1
   7 -11  -7 17.8826 1.45728  -2
   2  11   7 17.8826 1.45728   1
   8 -11  -8 3.30099 1.27361  -2
   2  11   8 3.30099 1.27361   1
  -2 -11  -9 11.9303 1.40526   1
   9  11  -9 982.658 4.71973  -2
   2 -11   9 982.658 4.71973   1
   2  11  10 5.70799 1.09647   1
   2  11  11 2.96984 1.66241   1
  10  11 -11 27.9089 1.91133  -2
   2 -11  11 27.9089 1.91133   1
  11  11 -12 51.6585 1.88416  -2
   2 -11  12 51.6585 1.88416   1
  12 -11 -13 4.68838 1.51108  -2
   2  11  13 4.68838 1.51108   1
   2 -11  14 15.2996 1.26292   1
  13 -11 -15 5.08157 3.48165  -2
   2  11  15 5.08157 3.48165   1
   9  12 -15 63.6366 1.86340  -2
  -2 -12  15 63.6366 1.86340   1
  -2 -12  14 6051.73 12.2620   1
   9 -12 -14 6224.36 18.5304  -2
  -2  12  14 6224.36 18.5304   1
   8  12 -13 1364.93 5.86492  -2
  -2 -12  13 1364.93 5.86492   1
  -7 -12  12 2314.65 8.10699  -2
   2  12 -12 2314.65 8.10699   1
   2  12 -11 35828.6 41.7774   1
   6  12 -11 42239.7 39.4262  -2
  -2 -12  11 42239.7 39.4262   1
   2  12 -10 4964.96 14.8150   1
  -5 -12   9 1713.30 8.29130  -2
   2  12  -9 1713.30 8.29130   1
  -4  12   8 18452.2 25.9701  -2
   2 -12  -8 18452.2 25.9701   1
   2  12  -7 151.353 2.55567   1
  -3  12   7 146.218 2.87701  -2
   2 -12  -7 146.218 2.87701   1
  -2 -12   5 406.694 4.02774   1
   1  12  -4 74.2691 2.73336  -2
  -2 -12   4 74.2691 2.73336   1
  -2 -12   3 9142.67 17.6272   1
  -2 -12   2 5681.87 13.6675   1
  -2 -12   1 14560.2 21.4309   1
  -2  12   0 40487.9 46.5597  -2
  -2 -12   0 40487.9 46.5597   1
  -2 -12  -1 9440.02 17.2993   1
   7 -12  -7 18314.9 27.8258  -2
   2  12   7 18314.9 27.8258   1
   8  12  -8 161.181 2.49680  -2
   2 -12   8 161.181 2.49680   1
   9  12  -9 9620.43 14.7895  -2
   2 -12   9 9620.43 14.7895   1
   2 -12  10 54216.9 35.9628   1
  10 -12 -11 454.011 3.25510  -2
   2  12  11 454.011 3.25510   1
  11  12 -12 553.187 6.91596  -2
   2 -12  12 553.187 6.91596   1
  12 -12 -13 112.186 1.95428  -2
   2  12  13 112.186 1.95428   1
   2 -12  14 262.316 3.55294   1
  13 -12 -14 261.148 4.31741  -2
   2  12  14 261.148 4.31741   1
   8 -13 -13-6.76280 2.77691  -2
  -2  13  13-6.76280 2.77691   1
   7 -13 -12 908.644 9.55761  -2
  -2  13  12 908.644 9.55761   1
   6 -13 -11-15.4549 2.91192  -2
  -2  13  11-15.4549 2.91192   1
  -2  13  10 1.46780 2.28855   1
   9 -13  -9 25.8181 2.48331  -2
   2  13   9 25.8181 2.48331   1
   2  13  10 0.58968 2.15070   1
   2 -13  11-3.69013 1.60185   1
  10 -13 -11 14.6419 2.78177  -2
   2  13  11 14.6419 2.78177   1
  11  13 -12 25.6685 1.83968  -2
   2 -13  12 25.6685 1.83968   1
   3   0 -23-0.68007 1.92669   1
   3   0 -22-11.4522 2.16200   1
 -13   0  21-3.05514 2.51863  -2
   3   0 -21-3.05514 2.51863   1
 -12   0  20 169.719 4.71160  -2
   3   0 -20 169.719 4.71160   1
   3   0 -19 17.6547 2.59175   1
  -3   0  18 11.2525 1.21585   1
  10   0 -17 1617.57 4.21846  -2
  -3   0  17 1617.57 4.21846   1
  -9   0  16 0.87340 1.04128  -2
   3   0 -16 0.87340 1.04128   1
  -3   0  15-4.08561 0.55868   1
  -3   0  14-3.33930 0.58834   1
   3   0 -13-0.75714 0.62186   1
   7   0 -13-0.55462 1.10980  -2
  -3   0  13-0.55462 1.10980   1
  -6   0  12 2391.54 3.72063  -2
   3   0 -12 2391.54 3.72063   1
   3   0 -11-0.74209 0.39807   1
   3   0 -10 2.01399 0.38609   1
   3   0  -9 1.47838 0.33990   1
  -3   0   8 2.52767 0.48701  -2
   3   0  -8 2.52767 0.48701   1
  -3   0   7-0.06993 0.44601   1
   3   0  -6 0.56924 0.44124   1
  -3   0   5 0.12127 0.42413   1
   0   0   4 4448.19 3.93823  -2
   3   0  -4 4448.19 3.93823   1
   3   0  -3 0.13650 0.30680   1
  -3   0   2 0.52608 0.24205   1
  -3   0   1 0.61294 0.19721   1
  -3   0   0 0.72387 0.24558  -2
  -3   0   0 0.72387 0.24558   1
   3   0   1 0.01304 0.26028   1
  -3   0  -2-1.05605 0.29199   1
   3   0   3 0.11717 0.37412   1
   6   0  -4 498.907 1.52534  -2
   3   0   4 498.907 1.52534   1
  -3   0  -5 1.25769 0.47491   1
   3   0   6 0.68903 0.40394   1
  -3   0  -7 0.87801 0.32589   1
  -9   0   8 1.70866 0.47488  -2
  -3   0  -8 1.70866 0.47488   1
   3   0   9 0.54859 0.45896   1
 -10   0   9 70.8080 1.18488  -2
  -3   0  -9 70.8080 1.18488   1
  -3   0 -10 1.28454 0.41297   1
   3   0  11-1.24202 0.38221   1
  12   0 -12 424.662 1.75202  -2
   3   0  12 424.662 1.75202   1
 -13   0  13 2.36251 0.63423  -2
  -3   0 -13 2.36251 0.63423   1
  -3   0 -14 2.38518 0.69965   1
  -3   0 -15 1.33805 1.33522   1
 -15   0  16-2.46332 2.73868  -2
  -3   0 -16-2.46332 2.73868   1
 -16   0  17 4.72863 3.40213  -2
  -3   0 -17 4.72863 3.40213   1
  -3   0 -18 0.77533 2.33618   1
  -3   0 -19 8.05832 2.47881   1
 -18   0  20 1221.62 10.2378  -2
  -3   0 -20 1221.62 10.2378   1
 -19   0  21-3.58248 2.20393  -2
  -3   0 -21-3.58248 2.20393   1
  -3   0 -22 17.3743 2.20100   1
   3   1 -23 3040.28 9.10092   1
   3  -1 -22 8728.34 15.5000   1
 -13   1  21 2557.53 8.18345  -2
   3  -1 -21 2557.53 8.18345   1
 -12  -1  20 21806.3 28.4981  -2
   3   1 -20 21806.3 28.4981   1
  -3  -1  19 2896.61 6.52952   1
   3   1 -18 5979.64 8.92346   1
 -10   1  17 16382.6 13.7387  -2
   3  -1 -17 16382.6 13.7387   1
  -9   1  16 6242.18 6.59150  -2
   3  -1 -16 6242.18 6.59150   1
   3   1 -15 37767.6 12.0735   1
  -8   1  15 36741.5 28.4863  -2
   3  -1 -15 36741.5 28.4863   1
  -3   1  14 2659.01 2.69148   1
   3  -1 -13 524.779 2.16112   1
   7  -1 -13 1328.23 2.12886  -2
  -3   1  13 1328.23 2.12886   1
   6  -1 -12 40876.7 11.7893  -2
  -3   1  12 40876.7 11.7893   1
   3  -1 -11 3907.98 2.57250   1
  -3  -1  10 29179.5 6.55972   1
   3   1  -9 2198.95 2.00278   1
  -4   1   9 2173.44 4.09512  -2
   3  -1  -9 2173.44 4.09512   1
  -3  -1   8 1306.41 1.55325  -2
   3   1  -8 1306.41 1.55325   1
   3  -1  -7 1753.47 1.55250   1
   3   1  -6 33133.0 8.43703   1
  -3   1   5 2987.45 1.61047   1
   0  -1  -4 1123.72 1.34814  -2
  -3   1   4 1123.72 1.34814   1
   3  -1  -3 1015.36 1.07297   1
  -3  -1   2 55.8585 0.55755   1
  -3   1   1 69.1375 0.46917   1
   3  -1   0 161.500 0.74872  -2
   3   1   0 161.500 0.74872   1
  -3  -1  -1 102.085 0.57925   1
  -3  -1  -2 323.680 2.20822   1
   3  -1   3 106.383 3.86794   1
  -6   1   4 2672.75 2.39008  -2
  -3  -1  -4 2672.75 2.39008   1
  -3  -1  -5 9270.29 3.76992   1
  -3   1  -6 547.296 0.83379   1
  -3   1  -7 61.1442 0.67040   1
  -9  -1   8 15295.9 5.88639  -2
  -3   1  -8 15295.9 5.88639   1
   3  -1   9 1861.80 2.25123   1
 -10   1   9 1926.07 2.31438  -2
  -3  -1  -9 1926.07 2.31438   1
   3  -1  10 34209.0 7.21035   1
   3   1  11 1114.01 1.48840   1
  11   1 -11 1034.31 4.31072  -2
   3  -1  11 1034.31 4.31072   1
 -12  -1  12 6781.13 5.54313  -2
  -3   1 -12 6781.13 5.54313   1
 -13   1  13 6296.89 4.48781  -2
  -3  -1 -13 6296.89 4.48781   1
  -3   1 -14 7613.87 5.86978   1
  -3  -1 -15 17776.7 11.5199   1
  14  -1 -15 18358.6 22.6744  -2
   3   1  15 18358.6 22.6744   1
  15   1 -16 6539.83 11.3863  -2
   3  -1  16 6539.83 11.3863   1
 -16  -1  17 22102.9 21.5500  -2
  -3   1 -17 22102.9 21.5500   1
  -3  -1 -18 254.610 3.02829   1
  -3  -1 -19 4827.75 11.2115   1
 -18  -1  20 11294.0 21.2290  -2
  -3   1 -20 11294.0 21.2290   1
 -19  -1  21 5793.18 12.4557  -2
  -3   1 -21 5793.18 12.4557   1
  -3   1 -22 4304.35 11.1019   1
   3   2 -23-3.17730 1.54574   1
   3  -2 -22-3.40200 1.31571   1
 -13  -2  21 4.38049 1.37618  -2
   3   2 -21 4.38049 1.37618   1
 -12   2  20 307.226 3.85869  -2
   3  -2 -20 307.226 3.85869   1
  -3  -2  19 9.99429 0.98215   1
   3   2 -18 0.67382 0.95768   1
 -10   2  17 133.801 1.56207  -2
   3  -2 -17 133.801 1.56207   1
   9   2 -16 8.51074 0.70736  -2
  -3  -2  16 8.51074 0.70736   1
   3   2 -15-2.02530 0.43139   1
  -8   2  15 3299.14 9.14640  -2
   3  -2 -15 3299.14 9.14640   1
   3   2 -14 3.80222 0.43316   1
   3  -2 -13 2.24662 0.60610   1
   7  -2 -13 2.69514 0.57796  -2
  -3   2  13 2.69514 0.57796   1
   6   2 -12 101.354 0.78140  -2
  -3  -2  12 101.354 0.78140   1
  -3   2  11 0.64593 0.33743   1
   3  -2 -10 0.31368 0.26746   1
   3  -2  -9 3.40883 0.26059   1
  -4   2   9 334.050 2.45093  -2
   3  -2  -9 334.050 2.45093   1
   3   2  -8 2.35038 0.31143  -2
  -3  -2   8 2.35038 0.31143   1
   3  -2  -7 1.13433 0.21050   1
  -3   2   6-0.00321 0.17917   1
   3   2  -5 0.94525 0.37461   1
   0  -2   4 1868.82 2.30523  -2
   3   2  -4 1868.82 2.30523   1
  -3  -2   3 1.05084 0.23652   1
  -3  -2   2 1.36643 0.19332   1
   3  -2  -1 0.39864 0.25169   1
  -3  -2   0 1.13927 0.22884  -2
  -3   2   0 1.13927 0.22884   1
  -3   2  -1 0.64521 0.24579   1
   3  -2   2 1.13159 0.32940   1
   3   2   3-0.00446 0.34124   1
   6  -2  -4 379.223 0.88851  -2
   3   2   4 379.223 0.88851   1
  -3  -2  -5 0.19309 0.23198   1
  -3   2  -6-0.19536 0.24576   1
   3   2   7 1.27408 0.28045   1
   9  -2  -8 0.04097 0.43541  -2
   3   2   8 0.04097 0.43541   1
   3  -2   9 0.83043 0.41199   1
 -10   2   9 2627.62 3.38794  -2
  -3  -2  -9 2627.62 3.38794   1
  -3  -2 -10 2.57248 0.38765   1
   3  -2  11 0.54745 0.36194   1
  12   2 -12 3872.86 4.66654  -2
   3  -2  12 3872.86 4.66654   1
   3   2  13-5.99957 1.37161   1
 -13   2  13-3.08452 0.64433  -2
  -3  -2 -13-3.08452 0.64433   1
   3  -2  14 0.46060 0.49234   1
  -3   2 -15 3.64496 0.60934   1
  14  -2 -15 3644.39 11.9857  -2
   3   2  15 3644.39 11.9857   1
 -15   2  16 7.87802 1.30009  -2
  -3  -2 -16 7.87802 1.30009   1
 -16   2  17 242.210 2.22372  -2
  -3  -2 -17 242.210 2.22372   1
  -3   2 -18-7.19912 0.91429   1
  -3  -2 -19-0.00751 1.33924   1
 -18  -2  20 161.284 3.01925  -2
  -3   2 -20 161.284 3.01925   1
 -19   2  21 9.72775 1.90331  -2
  -3  -2 -21 9.72775 1.90331   1
  -3   2 -22-0.48932 1.36448   1
   3  -3 -23 20100.9 23.5650   1
   3  -3 -22 2555.83 6.58179   1
 -13  -3  21 22.3393 1.45398  -2
   3   3 -21 22.3393 1.45398   1
 -12  -3  20 44358.5 32.3780  -2
   3   3 -20 44358.5 32.3780   1
   3  -3 -19 16321.8 15.7334   1
  -3  -3  18 4743.44 7.12523   1
  10   3 -17 23940.7 15.1670  -2
  -3  -3  17 23940.7 15.1670   1
  -9   3  16 20824.4 13.2481  -2
   3  -3 -16 20824.4 13.2481   1
   3   3 -15 16671.5 8.84551   1
  -8   3  15 16265.9 21.2244  -2
   3  -3 -15 16265.9 21.2244   1
   3   3 -14 1902.68 2.71874   1
   7   3 -13 12332.8 5.80938  -2
  -3  -3  13 12332.8 5.80938   1
   6  -3 -12 42201.8 13.9661  -2
  -3   3  12 42201.8 13.9661   1
   3   3 -11 1226.33 1.78122   1
  -3  -3  10 14092.0 5.49773   1
  -3   3   9 943.873 1.63251   1
  -4  -3   9 782.806 2.68789  -2
   3   3  -9 782.806 2.68789   1
  -3   3   8 6082.71 4.32697  -2
   3  -3  -8 6082.71 4.32697   1
   3  -3  -7 17407.2 5.57734   1
   3  -3  -6 15892.4 4.97486   1
   3   3  -5 24160.0 6.07481   1
   0   3  -4 56.4022 0.99875  -2
  -3  -3   4 56.4022 0.99875   1
  -3   3   3 63983.6 8.28056   1
   3  -3  -2 74562.2 9.62823   1
   3  -3  -1 8970.75 3.41999   1
   3   3   0 59271.6 8.66072  -2
   3  -3   0 59271.6 8.66072   1
   3   3   1 2139.55 1.91316   1
  -3  -3  -2 57105.0 13.7480   1
  -3   3  -3 54306.9 10.1917   1
   6  -3  -4 8393.26 8.52613  -2
   3   3   4 8393.26 8.52613   1
  -3   3  -5 36.8658 0.50897   1
  -7   3   5 219.245 2.00794  -2
  -3  -3  -5 219.245 2.00794   1
   3   3   6 7415.55 3.09728   1
   3  -3   7 15327.8 4.77024   1
  -9  -3   8 9553.49 5.74281  -2
  -3   3  -8 9553.49 5.74281   1
   3  -3   9 220.576 1.02728   1
 -10   3   9 197.512 1.25507  -2
  -3  -3  -9 197.512 1.25507   1
   3  -3  10 11141.0 5.21801   1
  -3  -3 -11 24670.3 8.98314   1
  12   3 -12 8835.22 7.25511  -2
   3  -3  12 8835.22 7.25511   1
  13   3 -13 3052.04 3.40583  -2
   3  -3  13 3052.04 3.40583   1
  -3  -3 -14 12530.6 7.32128   1
   3   3  15 51425.8 19.3527   1
 -14  -3  15 50492.9 38.7984  -2
  -3   3 -15 50492.9 38.7984   1
  15   3 -16 442.970 2.93452  -2
   3  -3  16 442.970 2.93452   1
 -16  -3  17 7601.74 8.85095  -2
  -3   3 -17 7601.74 8.85095   1
  -3   3 -18 16312.9 13.8421   1
  -3  -3 -19 2667.49 8.50685   1
 -18  -3  20 1371.09 7.60256  -2
  -3   3 -20 1371.09 7.60256   1
 -19   3  21 11549.2 24.4425  -2
  -3  -3 -21 11549.2 24.4425   1
  -3  -4  22 1.52341 1.17956   1
 -13  -4  21-5.80596 1.43398  -2
   3   4 -21-5.80596 1.43398   1
  12   4 -20 126.987 1.73739  -2
  -3  -4  20 126.987 1.73739   1
   3   4 -19-0.31646 0.97834   1
  11  -4 -19 17.3849 2.15267  -2
  -3   4  19 17.3849 2.15267   1
   3   4 -18-1.25906 0.95963   1
 -10   4  17 630.877 2.83196  -2
   3  -4 -17 630.877 2.83196   1
   9   4 -16 2.53278 1.03227  -2
  -3  -4  16 2.53278 1.03227   1
  -3   4  15 3.75084 0.54528   1
  -8   4  15 1480.67 6.95011  -2
   3  -4 -15 1480.67 6.95011   1
   3  -4 -14 0.95263 0.48223   1
  -7  -4  13 7.01458 0.61202  -2
   3   4 -13 7.01458 0.61202   1
  -6  -4  12 3182.09 3.88268  -2
   3   4 -12 3182.09 3.88268   1
   3  -4 -11 1.25721 0.39592   1
  -3  -4  10 0.28481 0.41076   1
   3   4  -9 1.69423 0.51077   1
  -4   4   9 3141.00 4.17816  -2
   3  -4  -9 3141.00 4.17816   1
  -3   4   8-0.05924 0.43692  -2
   3  -4  -8-0.05924 0.43692   1
   3  -4  -7 2.68258 0.34005   1
  -3  -4   6 0.63201 0.33052   1
  -3  -4   5-0.07661 0.28721   1
   0  -4  -4 1565.30 1.27367  -2
  -3   4   4 1565.30 1.27367   1
  -3  -4   3 0.19979 0.14703   1
   3   4  -2 0.03564 0.15627   1
   3   4  -1 0.48705 0.10730   1
   3   4   0 2.79728 0.20307  -2
   3  -4   0 2.79728 0.20307   1
  -3   4  -1 0.79428 0.26418   1
  -3   4  -2 0.19112 0.19920   1
  -3  -4  -3 0.71436 0.16472   1
   6  -4  -4 605.681 1.15841  -2
   3   4   4 605.681 1.15841   1
   3  -4   5 0.24526 0.31245   1
  -7   4   5-1.79944 1.36802  -2
  -3  -4  -5-1.79944 1.36802   1
  -3  -4  -6-0.94336 0.32376   1
   3  -4   7 0.88103 0.38853   1
  -9   4   8 1.48497 0.60468  -2
  -3  -4  -8 1.48497 0.60468   1
   3   4   9 1.10093 0.53565   1
 -10   4   9 18.4914 1.09770  -2
  -3  -4  -9 18.4914 1.09770   1
   3  -4  10 1.02045 0.46389   1
  -3  -4 -11 2.32079 0.47138   1
 -12   4  12 71.3519 0.91686  -2
  -3  -4 -12 71.3519 0.91686   1
   3   4  13-3.10232 1.14522   1
  13   4 -13 1.40932 0.73900  -2
   3  -4  13 1.40932 0.73900   1
  -3  -4 -14 1.44650 0.51363   1
  -3   4 -15 1.04750 0.94791   1
 -15  -4  16 3.35696 1.14205  -2
  -3   4 -16 3.35696 1.14205   1
  16   4 -17 4.79056 1.28115  -2
   3  -4  17 4.79056 1.28115   1
  -3  -4 -18-3.21883 0.87819   1
  -3   4 -19 0.34871 1.94299   1
  17  -4 -19 18.4636 2.74522  -2
   3   4  19 18.4636 2.74522   1
 -18   4  20 959.591 4.90336  -2
  -3  -4 -20 959.591 4.90336   1
 -19  -4  21 2.83686 2.66108  -2
  -3   4 -21 2.83686 2.66108   1
  -3  -5  22 12361.4 14.6622   1
  13   5 -21 6944.09 9.99180  -2
  -3  -5  21 6944.09 9.99180   1
 -12  -5  20 7450.51 13.9568  -2
   3   5 -20 7450.51 13.9568   1
   3   5 -19 19.2656 1.16385   1
  11  -5 -19 210.050 3.46191  -2
  -3   5  19 210.050 3.46191   1
   3  -5 -18 32123.4 22.2049   1
 -10  -5  17 7904.31 9.15668  -2
   3   5 -17 7904.31 9.15668   1
  -9  -5  16 1055.03 4.39858  -2
   3   5 -16 1055.03 4.39858   1
   3   5 -15 44822.3 18.1187   1
  -8   5  15 44545.3 38.5952  -2
   3  -5 -15 44545.3 38.5952   1
   3  -5 -14 10958.6 7.29163   1
   3  -5 -13 11436.2 18.8548   1
   7   5 -13 16767.5 8.31693  -2
  -3  -5  13 16767.5 8.31693   1
  -6   5  12 29212.7 12.7647  -2
   3  -5 -12 29212.7 12.7647   1
   3  -5 -11 3270.88 3.50892   1
   3   5 -10 26343.9 8.10684   1
   3  -5  -9 4840.18 4.38840   1
  -4  -5   9 4613.17 4.77300  -2
   3   5  -9 4613.17 4.77300   1
  -3   5   8 71.1572 0.89378  -2
   3  -5  -8 71.1572 0.89378   1
   3  -5  -7 15491.1 5.35981   1
   3   5  -6 41403.2 8.26856   1
  -3   5   5 31641.6 7.31730   1
   0  -5  -4 587.926 1.05601  -2
  -3   5   4 587.926 1.05601   1
   3   5  -3 23592.6 5.03753   1
  -3   5   2 31682.0 5.76144   1
   3   5  -1 3272.59 2.56046   1
   2   5   1 3569.84 5.30798  -2
   3  -5  -1 3569.84 5.30798   1
  -3  -5   0 31660.3 7.07336  -2
  -3   5   0 31660.3 7.07336   1
   3   5   1 437.913 0.76813   1
  -3   5  -2 30990.7 5.95775   1
  -3   5  -3 21932.7 4.87523   1
  -6  -5   4 614.544 1.05989  -2
  -3   5  -4 614.544 1.05989   1
   3  -5   5 16753.5 5.36263   1
  -3   5  -6 5128.49 3.15767   1
   3   5   7 5222.61 3.27298   1
  -9   5   8 15256.2 9.12828  -2
  -3  -5  -8 15256.2 9.12828   1
   3   5   9 1397.19 4.24972   1
  10   5  -9 1244.89 2.47558  -2
   3  -5   9 1244.89 2.47558   1
  -3   5 -10 41218.4 11.7903   1
   3  -5  11 2397.48 3.46955   1
  11  -5 -11 3939.03 7.52718  -2
   3   5  11 3939.03 7.52718   1
  12  -5 -12 3433.10 4.90049  -2
   3   5  12 3433.10 4.90049   1
 -13  -5  13 21328.9 9.34701  -2
  -3   5 -13 21328.9 9.34701   1
   3  -5  14 4018.84 5.20211   1
  -3   5 -15 2056.55 6.81827   1
  14   5 -15 2223.49 6.70714  -2
   3  -5  15 2223.49 6.70714   1
 -15  -5  16 21697.2 19.9653  -2
  -3   5 -16 21697.2 19.9653   1
 -16  -5  17 31953.1 19.2372  -2
  -3   5 -17 31953.1 19.2372   1
   3   5  18 4091.52 7.12560   1
  -3  -5 -19 5952.69 12.5482   1
  17  -5 -19 7610.40 13.1582  -2
   3   5  19 7610.40 13.1582   1
 -18   5  20 21753.6 21.3425  -2
  -3  -5 -20 21753.6 21.3425   1
 -19   5  21 2102.30 10.2031  -2
  -3  -5 -21 2102.30 10.2031   1
 -13  -6  21-4.72443 2.93216  -2
   3   6 -21-4.72443 2.93216   1
  12   6 -20 262.361 2.93640  -2
  -3  -6  20 262.361 2.93640   1
   3   6 -19 2.72550 0.97952   1
  11  -6 -19 15.7159 2.72241  -2
  -3   6  19 15.7159 2.72241   1
   3  -6 -18 1.42157 1.05280   1
 -10  -6  17 1056.71 3.69397  -2
   3   6 -17 1056.71 3.69397   1
  -9  -6  16 2.54497 1.68487  -2
   3   6 -16 2.54497 1.68487   1
  -3  -6  15-0.62520 0.98645   1
  -8   6  15 396.101 4.72673  -2
   3  -6 -15 396.101 4.72673   1
   3  -6 -14 3.10743 0.57240   1
  -7  -6  13 2.88535 0.73203  -2
   3   6 -13 2.88535 0.73203   1
  -6   6  12 100.236 1.08848  -2
   3  -6 -12 100.236 1.08848   1
  -3  -6  11 2.90746 0.52951   1
   3   6 -10 0.18912 0.51667   1
  -3   6   9 1.31670 0.54583   1
   4   6  -9 237.885 1.34484  -2
  -3  -6   9 237.885 1.34484   1
  -3  -6   8 2.33389 0.47610  -2
   3   6  -8 2.33389 0.47610   1
  -3  -6   7 2.73877 0.40226   1
  -3  -6   6-0.06700 0.36341   1
  -3  -6   5 1.68940 0.26842   1
  -1   6   5 12.4945 1.38471  -2
   3  -6  -5 12.4945 1.38471   1
   0  -6   4 2056.55 2.04838  -2
   3   6  -4 2056.55 2.04838   1
  -3  -6   3 4.01916 0.36301   1
  -3  -6   2 0.50239 0.19991   1
   3  -6  -1-0.17837 0.28667   1
   3   6   0 0.56416 0.24667  -2
   3  -6   0 0.56416 0.24667   1
  -3  -6  -1 0.61536 0.22225   1
   3  -6   2 0.72201 0.25249   1
  -3   6  -3 0.05227 0.26375   1
  -6  -6   4 34.5740 0.49837  -2
  -3   6  -4 34.5740 0.49837   1
  -3  -6  -5-0.42543 0.31541   1
   3  -6   6 2.45061 0.37736   1
   3  -6   7 3.55396 0.43203   1
  -9  -6   8 2.29992 0.62736  -2
  -3   6  -8 2.29992 0.62736   1
  -3   6  -9-2.55458 1.21178   1
  10   6  -9 2878.42 3.46758  -2
   3  -6   9 2878.42 3.46758   1
   3   6  10-2.17514 0.47721   1
  -3   6 -11 1.14848 0.58951   1
  11   6 -11-3.64807 2.44292  -2
   3  -6  11-3.64807 2.44292   1
 -12  -6  12 4331.27 5.63814  -2
  -3   6 -12 4331.27 5.63814   1
 -13  -6  13 6.99300 0.94766  -2
  -3   6 -13 6.99300 0.94766   1
   3  -6  14-5.33069 1.02701   1
   3   6  15 3.21313 1.01354   1
  15  -6 -16 17.3895 1.44678  -2
   3   6  16 17.3895 1.44678   1
  16   6 -17 374.400 2.63582  -2
   3  -6  17 374.400 2.63582   1
   3   6  18 2.05872 0.89656   1
  -3   6 -19-9.33706 1.37167   1
  17  -6 -19 33.6645 2.48200  -2
   3   6  19 33.6645 2.48200   1
 -18   6  20 307.805 2.79220  -2
  -3  -6 -20 307.805 2.79220   1
 -13  -7  21 203.830 3.78180  -2
   3   7 -21 203.830 3.78180   1
 -12  -7  20 41831.7 35.9437  -2
   3   7 -20 41831.7 35.9437   1
  -3  -7  19 17002.7 29.5321   1
  -3  -7  18 11264.0 17.0156   1
 -10  -7  17 22997.5 23.8990  -2
   3   7 -17 22997.5 23.8990   1
   9   7 -16 18191.6 21.5747  -2
  -3  -7  16 18191.6 21.5747   1
   3   7 -15 7812.82 18.8610   1
  -8   7  15 7434.71 12.0705  -2
   3  -7 -15 7434.71 12.0705   1
  -3  -7  14 1452.55 3.83413   1
   3  -7 -13 15174.8 20.7133   1
  -7  -7  13 18468.8 11.5633  -2
   3   7 -13 18468.8 11.5633   1
  -6  -7  12 18327.7 12.0744  -2
   3   7 -12 18327.7 12.0744   1
   3  -7 -11 1502.81 2.78425   1
  -5   7  11 1627.75 7.53714  -2
   3  -7 -11 1627.75 7.53714   1
   3  -7 -10 7067.92 5.33412   1
   3  -7  -9 202.399 1.73203   1
   4   7  -9 198.033 1.29760  -2
  -3  -7   9 198.033 1.29760   1
  -3   7   8 5475.48 6.10175  -2
   3  -7  -8 5475.48 6.10175   1
  -3   7   7 10708.8 5.33064   1
  -3   7   6 2468.86 2.49973   1
   3  -7  -5 25477.0 8.76965   1
   1   7  -5 27405.3 15.1142  -2
  -3  -7   5 27405.3 15.1142   1
   0   7   4 587.176 1.37675  -2
   3  -7  -4 587.176 1.37675   1
   3   7  -3 74262.3 12.0758   1
   3  -7  -2 73514.6 10.0881   1
   3   7  -1 4601.87 2.69599   1
   3  -7   0 58686.7 12.2625  -2
   3   7   0 58686.7 12.2625   1
  -3  -7  -1 1616.15 1.65542   1
   3  -7   2 74009.8 14.3216   1
  -3  -7  -3 67225.7 13.4828   1
   6   7  -4 1816.13 2.58044  -2
   3  -7   4 1816.13 2.58044   1
   3  -7   5 596.246 1.79040   1
  -7  -7   5 543.781 2.67098  -2
  -3   7  -5 543.781 2.67098   1
  -3   7  -6 3905.98 3.77813   1
  -3   7  -7 12149.2 7.58111   1
  -8   7   7 12827.8 17.4723  -2
  -3  -7  -7 12827.8 17.4723   1
  -9  -7   8 3286.10 5.04700  -2
  -3   7  -8 3286.10 5.04700   1
 -10  -7   9 1992.19 2.84546  -2
  -3   7  -9 1992.19 2.84546   1
  -3  -7 -10 3180.12 3.83845   1
  -3   7 -11 19714.3 12.7747   1
  11   7 -11 24334.8 16.1804  -2
   3  -7  11 24334.8 16.1804   1
  12  -7 -12 8137.82 11.4592  -2
   3   7  12 8137.82 11.4592   1
  13  -7 -13 4812.78 6.86189  -2
   3   7  13 4812.78 6.86189   1
  -3   7 -14 7490.71 8.99068   1
  -3   7 -15 49218.5 26.4746   1
  14  -7 -15 52741.5 50.0992  -2
   3   7  15 52741.5 50.0992   1
 -15   7  16 1638.42 5.87659  -2
  -3  -7 -16 1638.42 5.87659   1
  16  -7 -17 3579.86 6.59621  -2
   3   7  17 3579.86 6.59621   1
  -3   7 -18 21785.9 18.8288   1
  17  -7 -18 26015.7 37.8374  -2
   3   7  18 26015.7 37.8374   1
  -3   7 -19 1545.48 6.33586   1
  17   7 -19 2161.24 7.29298  -2
   3  -7  19 2161.24 7.29298   1
  12  -8 -20 92.1546 1.78992  -2
  -3   8  20 92.1546 1.78992   1
   3   8 -19 8.82781 1.29883   1
  11  -8 -19 23.5363 2.72522  -2
  -3   8  19 23.5363 2.72522   1
  -3   8  18 5.62232 1.07052   1
  10   8 -17 17.5665 1.98170  -2
  -3  -8  17 17.5665 1.98170   1
  -9   8  16 4.73543 1.55904  -2
   3  -8 -16 4.73543 1.55904   1
  -3  -8  15 5.05135 1.97108   1
  -8   8  15 3837.72 13.2656  -2
   3  -8 -15 3837.72 13.2656   1
   3   8 -14 1.82945 1.19479   1
  -7   8  13 8.84130 1.58408  -2
   3  -8 -13 8.84130 1.58408   1
  -6   8  12 3332.39 7.50460  -2
   3  -8 -12 3332.39 7.50460   1
   3   8 -11 3.44456 0.61791   1
  -5   8  11-3.54889 2.76408  -2
   3  -8 -11-3.54889 2.76408   1
   3  -8 -10 0.91422 0.74521   1
   4   8  -9 1548.86 2.78569  -2
  -3  -8   9 1548.86 2.78569   1
   3  -8  -8 4.22534 0.82000  -2
  -3   8   8 4.22534 0.82000   1
  -3  -8   7 2.86991 0.51902   1
   2   8  -7 132.340 2.49855  -2
  -3  -8   7 132.340 2.49855   1
   3  -8  -6 1.88137 0.49038   1
  -3  -8   5-0.63510 0.61892   1
   1   8  -5 4.50851 0.75935  -2
  -3  -8   5 4.50851 0.75935   1
   0  -8   4 320.692 1.40977  -2
   3   8  -4 320.692 1.40977   1
  -3  -8   3 0.05220 0.42304   1
   1   8   3-1.54853 1.45907  -2
   3  -8  -3-1.54853 1.45907   1
   3   8  -2-0.76959 0.38323   1
  -3   8   1 1.81817 0.35797   1
   2   8   1 3159.32 7.12421  -2
   3  -8  -1 3159.32 7.12421   1
   3   8   0 1.32877 0.43243  -2
   3  -8   0 1.32877 0.43243   1
   3   8   1 0.98458 0.31832   1
   4  -8  -1 9.51197 1.13127  -2
   3   8   1 9.51197 1.13127   1
  -3  -8  -2-0.75022 0.31409   1
   3   8   3 0.90066 0.42789   1
   5   8  -3 1.02289 1.39566  -2
   3  -8   3 1.02289 1.39566   1
  -6  -8   4 431.474 1.89944  -2
  -3   8  -4 431.474 1.89944   1
  -3  -8  -5 3.48653 0.66572   1
  -7   8   5-0.97139 0.83337  -2
  -3  -8  -5-0.97139 0.83337   1
   3  -8   6 4.10611 0.52366   1
   3  -8   7 0.07007 0.65583   1
   9   8  -8-0.62972 0.84017  -2
   3  -8   8-0.62972 0.84017   1
  10  -8  -9 130.280 1.15175  -2
   3   8   9 130.280 1.15175   1
  -3   8 -10 3.90746 0.62897   1
  -3  -8 -11 1.13842 1.14011   1
  11   8 -11 3.60169 1.85385  -2
   3  -8  11 3.60169 1.85385   1
  12  -8 -12 46.7775 1.29346  -2
   3   8  12 46.7775 1.29346   1
  13   8 -13 10.1189 1.20299  -2
   3  -8  13 10.1189 1.20299   1
   3   8  14-6.67074 0.86971   1
  -3   8 -15 2.99892 1.11934   1
  14   8 -15 334.692 3.34007  -2
   3  -8  15 334.692 3.34007   1
 -15   8  16 2.50632 1.16972  -2
  -3  -8 -16 2.50632 1.16972   1
 -16   8  17 91.2742 1.49463  -2
  -3  -8 -17 91.2742 1.49463   1
  -3  -8 -18-4.12784 1.04736   1
  -3   8 -19 1.33201 2.06579   1
  17  -8 -19 0.75161 2.87355  -2
   3   8  19 0.75161 2.87355   1
   3   9 -19 80.9164 2.27916   1
  11  -9 -19 157.742 2.99981  -2
  -3   9  19 157.742 2.99981   1
   3   9 -18 22482.9 20.7321   1
 -10  -9  17 4497.52 10.4205  -2
   3   9 -17 4497.52 10.4205   1
  -9  -9  16 1508.56 8.14644  -2
   3   9 -16 1508.56 8.14644   1
   3   9 -15 27910.0 25.8476   1
  -8   9  15 25507.9 34.9267  -2
   3  -9 -15 25507.9 34.9267   1
   3   9 -14 3015.63 6.96989   1
  -7  -9  13 7519.76 10.4741  -2
   3   9 -13 7519.76 10.4741   1
  -6  -9  12 25824.6 24.8976  -2
   3   9 -12 25824.6 24.8976   1
   3   9 -11 358.339 2.91467   1
  -5   9  11 605.959 5.47807  -2
   3  -9 -11 605.959 5.47807   1
   3  -9 -10 10967.7 9.89084   1
  -4   9   9 171.242 1.56432  -2
   3  -9  -9 171.242 1.56432   1
  -3   9   8 92.0415 1.44177  -2
   3  -9  -8 92.0415 1.44177   1
   3  -9  -7 1927.24 5.40687   1
   2   9  -7 1992.36 4.27191  -2
  -3  -9   7 1992.36 4.27191   1
  -3  -9   6 24757.3 11.5471   1
  -3  -9   5 10011.6 11.2566   1
   1   9  -5 10246.1 8.66153  -2
  -3  -9   5 10246.1 8.66153   1
   0   9   4 782.108 2.49709  -2
   3  -9  -4 782.108 2.49709   1
   3   9  -3 10094.7 8.73930   1
  -1   9  -3 11167.0 10.8254  -2
  -3  -9   3 11167.0 10.8254   1
  -3  -9   2 9739.82 6.56855   1
  -3  -9   1 378.596 1.78649   1
   3  -9   0 12305.5 9.23294  -2
   3   9   0 12305.5 9.23294   1
  -3   9  -1 104.112 0.88339   1
   4   9  -1 78.9522 1.51632  -2
   3  -9   1 78.9522 1.51632   1
   3  -9   2 9676.51 6.74829   1
  -3  -9  -3 11073.7 8.18038   1
   5  -9  -3 11727.6 16.9876  -2
   3   9   3 11727.6 16.9876   1
   6  -9  -4 5243.17 6.41258  -2
   3   9   4 5243.17 6.41258   1
  -3  -9  -5 6097.88 12.1991   1
   7   9  -5 6337.26 6.48129  -2
   3  -9   5 6337.26 6.48129   1
   3   9   6 228.468 1.28257   1
  -3   9  -7 465.708 1.94976   1
   8   9  -7 458.051 2.99679  -2
   3  -9   7 458.051 2.99679   1
  -9  -9   8 10823.5 10.1702  -2
  -3   9  -8 10823.5 10.1702   1
  -3  -9  -9 594.207 4.58089   1
  10   9  -9 598.114 2.83199  -2
   3  -9   9 598.114 2.83199   1
   3  -9  10 22018.4 14.1796   1
   3   9  11 43.7157 1.84797   1
  11   9 -11 295.351 3.97680  -2
   3  -9  11 295.351 3.97680   1
 -12   9  12 1443.83 5.22197  -2
  -3  -9 -12 1443.83 5.22197   1
 -13  -9  13 10508.7 10.4385  -2
  -3   9 -13 10508.7 10.4385   1
  -3  -9 -14 6232.25 8.47470   1
  -3  -9 -15 1740.41 6.19565   1
  14   9 -15 1852.82 6.93466  -2
   3  -9  15 1852.82 6.93466   1
 -15   9  16 10752.1 14.9941  -2
  -3  -9 -16 10752.1 14.9941   1
 -16  -9  17 18593.6 16.6953  -2
  -3   9 -17 18593.6 16.6953   1
   3   9  18 1492.08 4.37848   1
  -3  10  18 3.64840 1.18466   1
  10  10 -17 1895.69 6.32947  -2
  -3 -10  17 1895.69 6.32947   1
   9  10 -16 2.79933 1.81674  -2
  -3 -10  16 2.79933 1.81674   1
   3  10 -15 4.11417 2.24914   1
   8  10 -15 48.1017 2.30095  -2
  -3 -10  15 48.1017 2.30095   1
   3  10 -14 1.26129 1.07164   1
   7  10 -13 3.00740 1.27427  -2
  -3 -10  13 3.00740 1.27427   1
  -6 -10  12 258.219 2.91710  -2
   3  10 -12 258.219 2.91710   1
   3  10 -11-1.73902 2.07491   1
   5  10 -11 8.44573 1.48680  -2
  -3 -10  11 8.44573 1.48680   1
  -3 -10  10-2.09398 1.05241   1
  -4 -10   9 43.9273 1.44170  -2
   3  10  -9 43.9273 1.44170   1
  -3 -10   8 0.61091 0.83746  -2
   3  10  -8 0.61091 0.83746   1
  -3 -10   7 0.55590 1.90862   1
   2  10  -7 1095.54 4.11549  -2
  -3 -10   7 1095.54 4.11549   1
   3 -10  -6 6.38702 0.71435   1
  -3 -10   5-2.51283 0.96653   1
   0  10   4 791.358 3.39936  -2
   3 -10  -4 791.358 3.39936   1
  -3 -10   3-3.75963 1.64481   1
  -1  10  -3-7.19113 1.36599  -2
  -3 -10   3-7.19113 1.36599   1
   3  10  -2-1.36688 0.65676   1
  -3 -10   1 0.49192 0.62065   1
  -3  10   0-1.73969 1.92273  -2
  -3 -10   0-1.73969 1.92273   1
   3  10   1-0.67532 0.98624   1
  -3 -10  -2-2.35870 0.88907   1
  -3 -10  -3 6.78756 0.55792   1
   5 -10  -3 5.18713 1.52712  -2
   3  10   3 5.18713 1.52712   1
   6 -10  -4 13.2287 0.73284  -2
   3  10   4 13.2287 0.73284   1
  -3 -10  -5 14.0281 1.50788   1
   7 -10  -5 0.42596 0.84584  -2
   3  10   5 0.42596 0.84584   1
   3  10   6-0.77628 0.57774   1
  -3 -10  -7 1.77423 1.36629   1
   8  10  -7 63.1252 1.65392  -2
   3 -10   7 63.1252 1.65392   1
   9 -10  -8 2.69508 1.18217  -2
   3  10   8 2.69508 1.18217   1
  -3 -10  -9-15.5498 1.80858   1
  10  10  -9 1719.86 6.02210  -2
   3 -10   9 1719.86 6.02210   1
   3 -10  10-7.40779 0.90560   1
  -3 -10 -11-12.8702 1.35107   1
  11 -10 -11 11.6184 1.68072  -2
   3  10  11 11.6184 1.68072   1
 -12  10  12 3203.95 9.02247  -2
  -3 -10 -12 3203.95 9.02247   1
  13 -10 -13-2.57323 1.31384  -2
   3  10  13-2.57323 1.31384   1
   3  10  14 2.48723 0.99965   1
  14  10 -15 3468.48 9.37783  -2
   3 -10  15 3468.48 9.37783   1
 -15  10  16 2.36893 1.65795  -2
  -3 -10 -16 2.36893 1.65795   1
 -10 -11  17 15289.0 18.1156  -2
   3  11 -17 15289.0 18.1156   1
   9 -11 -16 4051.12 10.1982  -2
  -3  11  16 4051.12 10.1982   1
   3  11 -15 6886.99 19.2871   1
   8  11 -15 7094.04 17.3680  -2
  -3 -11  15 7094.04 17.3680   1
  -3 -11  14 1505.62 6.12201   1
  -7 -11  13 4044.51 8.20435  -2
   3  11 -13 4044.51 8.20435   1
  -6  11  12 4032.70 10.5129  -2
   3 -11 -12 4032.70 10.5129   1
   3  11 -11 3793.94 13.1681   1
   5  11 -11 4184.27 9.14897  -2
  -3 -11  11 4184.27 9.14897   1
   3 -11 -10 6311.30 9.47058   1
  -4 -11   9 2798.67 6.05565  -2
   3  11  -9 2798.67 6.05565   1
  -3 -11   8 2249.80 9.08222  -2
   3  11  -8 2249.80 9.08222   1
  -2  11   7 220.210 3.29346  -2
   3 -11  -7 220.210 3.29346   1
  -3 -11   6 528.442 3.24664   1
  -3 -11   5 3073.75 10.2649   1
   1  11  -5 2797.98 6.63025  -2
  -3 -11   5 2797.98 6.63025   1
   0  11  -4 3549.49 10.0803  -2
  -3 -11   4 3549.49 10.0803   1
  -3 -11   3 17588.5 23.3644   1
  -3 -11   2 11374.1 18.3434   1
  -3 -11   1 142.463 2.45386   1
  -3  11   0 11423.6 17.8142  -2
  -3 -11   0 11423.6 17.8142   1
   3  11   1 185.438 2.62323   1
  -3 -11  -2 9574.02 12.3964   1
  -3 -11  -3 16547.3 16.2744   1
  -6  11   4 894.898 7.03715  -2
  -3 -11  -4 894.898 7.03715   1
  -3 -11  -5 333.056 3.27172   1
   7  11  -5 182.954 1.93462  -2
   3 -11   5 182.954 1.93462   1
   3 -11   6 343.912 2.04598   1
  -3 -11  -7 1241.75 6.28367   1
   8  11  -7 1187.96 4.76228  -2
   3 -11   7 1187.96 4.76228   1
  -9  11   8 739.697 4.17739  -2
  -3 -11  -8 739.697 4.17739   1
  -3 -11  -9 9029.30 17.6010   1
  10 -11  -9 9041.04 13.7896  -2
   3  11   9 9041.04 13.7896   1
   3  11  10 2883.50 6.31509   1
  -3 -11 -11 1738.05 8.04790   1
  11 -11 -11 2454.09 7.41651  -2
   3  11  11 2454.09 7.41651   1
 -12  11  12 6630.39 15.6918  -2
  -3 -11 -12 6630.39 15.6918   1
  13 -11 -13 616.918 6.69113  -2
   3  11  13 616.918 6.69113   1
   3  11  14 1244.37 5.86524   1
  14  11 -15 19737.1 22.5067  -2
   3 -11  15 19737.1 22.5067   1
   8  12 -15 3449.21 9.20021  -2
  -3 -12  15 3449.21 9.20021   1
  -3 -12  14 23.1672 1.24007   1
   8 -12 -14 454.971 5.30628  -2
  -3  12  14 454.971 5.30628   1
  -7 -12  13 2.89774 1.48254  -2
   3  12 -13 2.89774 1.48254   1
  -6 -12  12 1886.33 12.5851  -2
   3  12 -12 1886.33 12.5851   1
   3  12 -11-2.37654 2.04867   1
  -5  12  11 5.09885 2.57005  -2
   3 -12 -11 5.09885 2.57005   1
   3 -12 -10-13.2535 1.19486   1
  -4  12   9 623.774 3.92018  -2
   3 -12  -9 623.774 3.92018   1
  -3 -12   8 4.10091 1.53181  -2
   3  12  -8 4.10091 1.53181   1
   3  12  -7 9.41059 1.60894   1
  -2  12   7 27.3111 2.00879  -2
   3 -12  -7 27.3111 2.00879   1
  -3 -12   6 3.59524 1.59040   1
   0  12  -4 171.411 4.13521  -2
  -3 -12   4 171.411 4.13521   1
  -3 -12   3-0.98894 1.65286   1
  -3 -12   2 9.80165 1.56756   1
  -3 -12   1-14.4824 1.44266   1
  -3  12   0 0.61105 1.66270  -2
  -3 -12   0 0.61105 1.66270   1
  -3 -12  -1 2.32401 1.22727   1
  -3 -12  -3 16.7332 1.32458   1
  -6  12   4 61.9177 2.19607  -2
  -3 -12  -4 61.9177 2.19607   1
  -3 -12  -5 6.45507 1.40426   1
  -3 -12  -6-3.66460 1.41458   1
   3 -12   7 31.3649 1.56720   1
   8 -12  -7 3489.78 12.2883  -2
   3  12   7 3489.78 12.2883   1
   9 -12  -8 5.11967 1.35242  -2
   3  12   8 5.11967 1.35242   1
  10  12  -9 68.5805 1.66488  -2
   3 -12   9 68.5805 1.66488   1
   3 -12  10 0.60524 1.14130   1
   3 -12  11 16.6187 1.59380   1
  11 -12 -11 24.3957 2.91279  -2
   3  12  11 24.3957 2.91279   1
  12  12 -12 28.0155 1.59956  -2
   3 -12  12 28.0155 1.59956   1
  13 -12 -13 12.7666 1.85820  -2
   3  12  13 12.7666 1.85820   1
   3 -12  14-4.13750 1.39639   1
   3  13 -13 58.5554 2.02665   1
   7 -13 -13 53.2402 2.98357  -2
  -3  13  13 53.2402 2.98357   1
   6 -13 -12 23519.6 49.6751  -2
  -3  13  12 23519.6 49.6751   1
   3  13 -11 252.841 3.52318   1
   5 -13 -11 246.063 3.80041  -2
  -3  13  11 246.063 3.80041   1
   3  13 -10 2533.88 7.97313   1
  -4 -13   9 6336.24 16.0646  -2
   3  13  -9 6336.24 16.0646   1
  -3 -13   8 14.5376 2.02723  -2
   3  13  -8 14.5376 2.02723   1
   3  13  -7 1287.34 7.48639   1
  -3 -13   5 46.2380 1.84033   1
   0  13  -4 1807.18 11.1935  -2
  -3 -13   4 1807.18 11.1935   1
  -3 -13   3 31.0065 1.59540   1
   3 -13  10 7158.57 17.4854   1
   3 -13  11 5380.60 15.6318   1
  11 -13 -11 6188.94 18.2931  -2
   3  13  11 6188.94 18.2931   1
  12  13 -12 581.178 5.14865  -2
   3 -13  12 581.178 5.14865   1
   4   0 -22 19624.0 32.1707   1
 -12   0  21 25006.3 35.1549  -2
   4   0 -21 25006.3 35.1549   1
 -11   0  20 1434.74 10.8628  -2
   4   0 -20 1434.74 10.8628   1
   4   0 -19 1338.62 8.00358   1
  -4   0  18 2041.90 6.28534   1
  -9   0  17 673.240 2.83418  -2
   4   0 -17 673.240 2.83418   1
  -8   0  16 1154.36 4.00141  -2
   4   0 -16 1154.36 4.00141   1
  -4   0  15 439.685 2.27541   1
   4   0 -14 1599.30 3.47935   1
   4   0 -13 23621.0 17.1426   1
  -6   0  13 25896.1 10.8734  -2
   4   0 -13 25896.1 10.8734   1
  -5   0  12 51437.1 16.6746  -2
   4   0 -12 51437.1 16.6746   1
   4   0 -11 550.406 1.34833   1
   4   0 -10 423228. 33.5628   1
   4   0  -9 18663.5 7.53714   1
  -2   0   8 10628.3 6.69215  -2
   4   0  -8 10628.3 6.69215   1
   4   0  -7 10721.7 6.09011   1
  -4   0   6 1679.31 2.28692   1
  -4   0   5 335.943 1.03204   1
   1   0   4 11506.5 6.70419  -2
   4   0  -4 11506.5 6.70419   1
  -4   0   3 31489.1 7.66769   1
   4   0  -2 81385.7 11.7058   1
   4   0  -1 34553.9 7.50766   1
  -4   0   0 125081. 19.6191  -2
  -4   0   0 125081. 19.6191   1
   4   0   1 32142.9 8.49444   1
   4   0   2 5732.33 4.76368   1
   4   0   3 2553.68 2.50107   1
   7   0  -4 489.330 1.65136  -2
   4   0   4 489.330 1.65136   1
  -4   0  -5 24807.1 8.02598   1
  -4   0  -6 25697.1 7.78268   1
   4   0   7 1417.29 1.80596   1
 -10   0   8 382004. 39.7668  -2
  -4   0  -8 382004. 39.7668   1
   4   0   9 6982.42 5.35611   1
 -11   0   9 6974.51 7.69365  -2
  -4   0  -9 6974.51 7.69365   1
   4   0  10 85588.9 16.4743   1
   4   0  11 73256.8 15.8465   1
 -13   0  12 4421.12 6.10922  -2
  -4   0 -12 4421.12 6.10922   1
  14   0 -13 7288.93 6.07201  -2
   4   0  13 7288.93 6.07201   1
  -4   0 -14 6810.58 8.78631   1
  -4   0 -15 287.102 3.95991   1
 -16   0  16 8362.65 23.6208  -2
  -4   0 -16 8362.65 23.6208   1
 -17   0  17 1312.91 8.02245  -2
  -4   0 -17 1312.91 8.02245   1
  -4   0 -18 367.116 4.84526   1
  -4   0 -19 22577.2 34.4697   1
 -19   0  20 18453.0 38.2691  -2
  -4   0 -20 18453.0 38.2691   1
   4   1 -23 19.2606 1.47324   1
   4   1 -22 3.16207 1.24396   1
 -12  -1  21 13.5917 1.77763  -2
   4   1 -21 13.5917 1.77763   1
 -11   1  20 72.8476 1.58415  -2
   4  -1 -20 72.8476 1.58415   1
  -4  -1  19 9.54723 0.96566   1
  -4  -1  18-3.58783 1.00152   1
  -9   1  17 2964.27 4.67988  -2
   4  -1 -17 2964.27 4.67988   1
  -8   1  16 7.76980 0.59881  -2
   4  -1 -16 7.76980 0.59881   1
   4   1 -15-0.80397 0.39598   1
   4   1 -14-0.64940 0.33322   1
   4  -1 -13 1.33290 0.59046   1
   6  -1 -13 2.65416 0.55574  -2
  -4   1  13 2.65416 0.55574   1
  -5  -1  12 2472.74 3.05316  -2
   4   1 -12 2472.74 3.05316   1
   4  -1 -11 0.50578 0.29580   1
   4   1 -10 1.27292 0.29741   1
   4  -1  -9 1.16728 0.27193   1
  -3   1   9 451.028 2.74030  -2
   4  -1  -9 451.028 2.74030   1
  -2   1   8 4.87242 0.32078  -2
   4  -1  -8 4.87242 0.32078   1
  -4  -1   7-0.39311 0.25672   1
   4   1  -6 0.75947 0.29336   1
  -4  -1   5 0.33450 0.21008   1
  -1   1  -4 620.568 0.96580  -2
  -4  -1   4 620.568 0.96580   1
  -4  -1   3-0.34626 0.21361   1
   4   1  -2 0.10960 0.20143   1
   4  -1  -1 1.28769 0.21068   1
  -4  -1   0 0.49660 0.23952  -2
  -4   1   0 0.49660 0.23952   1
   4  -1   1 0.99021 0.20202   1
   4  -1   2-0.40846 0.23616   1
   4  -1   3-0.68420 0.15941   1
   7   1  -4 3711.54 2.96678  -2
   4  -1   4 3711.54 2.96678   1
  -4   1  -5 0.68508 0.24782   1
   4  -1   6 0.46393 0.25159   1
   4  -1   7 0.99925 0.25759   1
 -10  -1   8 2.29714 0.31620  -2
  -4   1  -8 2.29714 0.31620   1
   4   1   9 0.42927 0.29743   1
 -11   1   9 40.4125 0.74812  -2
  -4  -1  -9 40.4125 0.74812   1
  -4   1 -10 1.65264 0.27134   1
  -4  -1 -11-6.69656 0.33004   1
  13   1 -12 6626.69 5.58715  -2
   4  -1  12 6626.69 5.58715   1
  -4  -1 -13-3.74159 0.89861   1
 -14  -1  13 5.13922 0.60894  -2
  -4   1 -13 5.13922 0.60894   1
   4   1  14 3.44795 0.51890   1
  -4   1 -15-2.82118 0.72671   1
  15  -1 -15 3822.57 11.0370  -2
   4   1  15 3822.57 11.0370   1
 -16   1  16 1.61296 1.85929  -2
  -4  -1 -16 1.61296 1.85929   1
 -17  -1  17 3627.44 9.01428  -2
  -4   1 -17 3627.44 9.01428   1
  -4  -1 -18 1.52908 1.58367   1
  -4  -1 -19-12.4425 1.32088   1
 -19   1  20 2746.08 10.3744  -2
  -4  -1 -20 2746.08 10.3744   1
 -20  -1  21 12.9835 1.94839  -2
  -4   1 -21 12.9835 1.94839   1
   4   2 -23 7871.60 14.7762   1
   4   2 -22 438.166 3.47380   1
 -12   2  21 4040.81 10.7183  -2
   4  -2 -21 4040.81 10.7183   1
 -11   2  20 159.539 2.24132  -2
   4  -2 -20 159.539 2.24132   1
   4   2 -19 1848.02 5.32040   1
  -4  -2  18 3505.00 6.99109   1
  -9   2  17 11815.5 9.08657  -2
   4  -2 -17 11815.5 9.08657   1
   8   2 -16 19233.2 12.7803  -2
  -4  -2  16 19233.2 12.7803   1
   4  -2 -15 109571. 20.8984   1
  -7  -2  15 105891. 47.6681  -2
   4   2 -15 105891. 47.6681   1
   4  -2 -14 687.842 1.49987   1
  -4   2  13 2695.31 7.66055   1
  -6   2  13 4636.41 3.47672  -2
   4  -2 -13 4636.41 3.47672   1
  -5   2  12 5925.11 4.80320  -2
   4  -2 -12 5925.11 4.80320   1
   4   2 -11 2666.87 2.50413   1
   4  -2 -10 21677.2 6.31586   1
  -4   2   9 1561.89 1.56064   1
  -3  -2   9 1640.12 3.57375  -2
   4   2  -9 1640.12 3.57375   1
   2   2  -8 52576.6 10.0530  -2
  -4  -2   8 52576.6 10.0530   1
   4   2  -7 2219.23 1.67066   1
   4  -2  -6 949.291 0.96091   1
   4   2  -5 543779. 32.7694   1
   1  -2   4 12013.4 4.66715  -2
   4   2  -4 12013.4 4.66715   1
  -4  -2   3 30414.9 4.52013   1
   4  -2  -2 4703.27 1.67906   1
  -4   2   1 39.1009 0.56368   1
  -4  -2   0 12685.4 6.64565  -2
  -4   2   0 12685.4 6.64565   1
   4   2   1 23207.0 5.76461   1
  -4  -2  -2 7317.55 3.50039   1
  -4  -2  -3 513239. 31.5441   1
  -7   2   4 153.168 1.64200  -2
  -4  -2  -4 153.168 1.64200   1
   4  -2   5 784.341 1.73564   1
  -8   2   5 937.272 3.13888  -2
  -4  -2  -5 937.272 3.13888   1
  -4   2  -6 52512.8 7.97558   1
  -4   2  -7 12555.3 4.17849   1
 -10  -2   8 700.723 1.42963  -2
  -4   2  -8 700.723 1.42963   1
  -4  -2  -9 28695.9 13.4465   1
 -11   2   9 27086.2 9.18569  -2
  -4  -2  -9 27086.2 9.18569   1
   4  -2  10 3041.43 2.78260   1
   4  -2  11 5495.36 3.90712   1
 -13  -2  12 2898.25 4.14593  -2
  -4   2 -12 2898.25 4.14593   1
 -14   2  13 73909.7 16.0944  -2
  -4  -2 -13 73909.7 16.0944   1
   4  -2  14 31734.4 11.6035   1
  -4  -2 -15 19544.4 15.2636   1
 -15  -2  15 19526.7 17.4194  -2
  -4   2 -15 19526.7 17.4194   1
  16  -2 -16 18966.1 17.5439  -2
   4   2  16 18966.1 17.5439   1
 -17   2  17 7474.69 10.2881  -2
  -4  -2 -17 7474.69 10.2881   1
  -4   2 -18 222.950 2.77741   1
  -4   2 -19 1202.43 5.86930   1
 -19   2  20 3263.28 11.7322  -2
  -4  -2 -20 3263.28 11.7322   1
 -20   2  21 8659.76 15.0616  -2
  -4  -2 -21 8659.76 15.0616   1
  -4  -3  23 1.68009 1.56153   1
   4   3 -22 6.18019 1.07590   1
 -12   3  21-4.94220 1.41697  -2
   4  -3 -21-4.94220 1.41697   1
  11   3 -20 1623.26 6.40477  -2
  -4  -3  20 1623.26 6.40477   1
   4   3 -19-4.69805 0.85356   1
   4  -3 -18-0.07067 0.77496   1
  -9  -3  17 4259.21 6.30181  -2
   4   3 -17 4259.21 6.30181   1
  -8  -3  16 3.41777 0.63028  -2
   4   3 -16 3.41777 0.63028   1
   4   3 -15-0.57676 0.48288   1
   4  -3 -14 3.89617 0.43898   1
   4   3 -13 4.81945 0.95965   1
  -6   3  13 10.0885 0.63661  -2
   4  -3 -13 10.0885 0.63661   1
  -5   3  12 988.817 2.20832  -2
   4  -3 -12 988.817 2.20832   1
  -4  -3  11 5.27772 0.33833   1
   4   3 -10 3.24660 0.32879   1
  -4   3   9 2.91396 0.37411   1
  -3  -3   9 189.697 1.24269  -2
   4   3  -9 189.697 1.24269   1
   2   3  -8 2.09242 0.48621  -2
  -4  -3   8 2.09242 0.48621   1
   4   3  -7 1.57679 0.33448   1
   4  -3  -6-0.96893 0.28569   1
   4  -3  -5-0.69573 0.27720   1
   1  -3   4 4847.34 3.83615  -2
   4   3  -4 4847.34 3.83615   1
   4  -3  -3 0.04575 0.14155   1
  -4  -3   2 0.97764 0.30568   1
   4  -3  -1 0.67065 0.31346   1
   4   3   0 0.17749 0.22399  -2
   4  -3   0 0.17749 0.22399   1
   4   3   1 0.16898 0.15475   1
  -4   3  -2 1.35488 0.33268   1
  -4  -3  -3 1.13171 0.27726   1
   7  -3  -4 3503.15 3.09877  -2
   4   3   4 3503.15 3.09877   1
   4  -3   5-0.17119 0.30154   1
  -8   3   5 7.51409 1.31729  -2
  -4  -3  -5 7.51409 1.31729   1
  -4   3  -6-0.11617 0.17932   1
  -4  -3  -7 1.32054 0.35467   1
  10   3  -8 0.73694 0.46264  -2
   4  -3   8 0.73694 0.46264   1
   4   3   9 0.04472 0.58533   1
  11  -3  -9 341.691 1.30003  -2
   4   3   9 341.691 1.30003   1
  -4   3 -10-1.80539 0.38046   1
  -4   3 -11 2.85890 0.49247   1
  13   3 -12 3096.42 4.47668  -2
   4  -3  12 3096.42 4.47668   1
 -14  -3  13 6.83823 0.61164  -2
  -4   3 -13 6.83823 0.61164   1
  -4  -3 -14 0.44426 0.48545   1
  -4  -3 -15 6.15506 0.88714   1
  15  -3 -15 8407.29 11.7680  -2
   4   3  15 8407.29 11.7680   1
  16   3 -16 9.76482 1.10318  -2
   4  -3  16 9.76482 1.10318   1
 -17  -3  17 3469.49 7.63436  -2
  -4   3 -17 3469.49 7.63436   1
   4  -3  18-4.86263 0.87385   1
  -4  -3 -19 9.47527 1.38816   1
 -19   3  20 787.409 8.06662  -2
  -4  -3 -20 787.409 8.06662   1
 -20   3  21-0.96965 1.89965  -2
  -4  -3 -21-0.96965 1.89965   1
   4   4 -23 153.912 2.12290   1
   4   4 -22 11138.0 14.0365   1
  12   4 -21 9867.27 13.2139  -2
  -4  -4  21 9867.27 13.2139   1
 -11   4  20 116.100 1.46149  -2
   4  -4 -20 116.100 1.46149   1
  -4  -4  19 581.365 3.16134   1
   4   4 -18 705.262 2.89713   1
  -9   4  17 481.002 2.40536  -2
   4  -4 -17 481.002 2.40536   1
  -8  -4  16 410.241 2.14993  -2
   4   4 -16 410.241 2.14993   1
  -4  -4  15 1467.37 3.00446   1
  -7   4  15 1323.29 4.43305  -2
   4  -4 -15 1323.29 4.43305   1
  -4  -4  14 1870.93 2.76170   1
  -6   4  13 14703.2 6.94999  -2
   4  -4 -13 14703.2 6.94999   1
  -5  -4  12 20445.6 10.5029  -2
   4   4 -12 20445.6 10.5029   1
   4   4 -11 142.436 0.73753   1
  -4   4  10 228433. 23.2015   1
   4  -4  -9 14794.4 7.71689   1
  -3  -4   9 14442.0 7.63806  -2
   4   4  -9 14442.0 7.63806   1
  -2   4   8 869.123 1.65975  -2
   4  -4  -8 869.123 1.65975   1
  -4  -4   7 2647.42 2.28788   1
  -4  -4   6 8550.76 3.81896   1
   4   4  -5 19281.2 5.34699   1
  -1   4  -4 3035.93 1.75145  -2
  -4  -4   4 3035.93 1.75145   1
  -4  -4   3 7884.12 3.20047   1
  -4  -4   2 37071.5 7.55802   1
   4  -4  -1 9208.72 3.73041   1
   4  -4   0 35697.3 6.28038  -2
   4   4   0 35697.3 6.28038   1
   4   4   1 9291.62 3.54385   1
  -4  -4  -2 1363.96 1.16417   1
  -4  -4  -3 7103.26 3.31776   1
  -7  -4   4 2820.53 2.94642  -2
  -4   4  -4 2820.53 2.94642   1
  -4   4  -5 11849.3 4.96462   1
  -8   4   5 12081.6 9.66299  -2
  -4  -4  -5 12081.6 9.66299   1
   4  -4   6 4676.32 2.96349   1
  -4  -4  -7 358.802 0.93578   1
 -10  -4   8 198670. 27.6059  -2
  -4   4  -8 198670. 27.6059   1
  -4  -4  -9 3930.70 9.25374   1
 -11  -4   9 4020.79 3.61420  -2
  -4   4  -9 4020.79 3.61420   1
   4   4  10 44016.2 12.1299   1
  -4   4 -11 44259.2 12.6414   1
  13   4 -12 5428.49 6.05816  -2
   4  -4  12 5428.49 6.05816   1
  14   4 -13 208.115 1.24254  -2
   4  -4  13 208.115 1.24254   1
   4   4  14 11385.3 7.41487   1
   4   4  15 4031.83 7.63045   1
  15   4 -15 3976.56 11.5337  -2
   4  -4  15 3976.56 11.5337   1
  16  -4 -16 7079.96 11.3377  -2
   4   4  16 7079.96 11.3377   1
 -17  -4  17 572.673 2.71072  -2
  -4   4 -17 572.673 2.71072   1
  -4  -4 -18 802.670 3.24274   1
  -4  -4 -19 10772.1 23.9783   1
  18  -4 -19 12402.2 16.4726  -2
   4   4  19 12402.2 16.4726   1
 -19  -4  20 11641.7 17.2577  -2
  -4   4 -20 11641.7 17.2577   1
   4   5 -22 19.7081 1.38497   1
  12  -5 -21 6.03764 1.68725  -2
  -4   5  21 6.03764 1.68725   1
 -11   5  20 95.3707 1.77571  -2
   4  -5 -20 95.3707 1.77571   1
   4   5 -19 3.06159 0.99351   1
   4  -5 -18-0.42660 0.86213   1
  -9   5  17 1873.18 4.61582  -2
   4  -5 -17 1873.18 4.61582   1
   8   5 -16-2.03998 1.08898  -2
  -4  -5  16-2.03998 1.08898   1
  -4  -5  15 4.84074 0.55610   1
   4  -5 -14 2.19723 0.57976   1
  -6  -5  13 3.59405 0.82344  -2
   4   5 -13 3.59405 0.82344   1
   5   5 -12 2760.82 4.41328  -2
  -4  -5  12 2760.82 4.41328   1
  -4  -5  11 0.76228 0.38513   1
   4   5 -10 1.75529 0.38165   1
   4  -5  -9 0.85956 0.42376   1
   3   5  -9 1021.78 2.63396  -2
  -4  -5   9 1021.78 2.63396   1
   2  -5  -8 1.57446 0.41523  -2
  -4   5   8 1.57446 0.41523   1
  -4  -5   7 1.20654 0.30571   1
  -4  -5   6 0.50564 0.33114   1
  -4   5   5 0.17215 0.27258   1
  -1   5  -4 13.6455 0.25040  -2
  -4  -5   4 13.6455 0.25040   1
  -4  -5   3 1.34075 0.28901   1
   4   5  -2 0.04159 0.28424   1
   4   5  -1 0.36917 0.28014   1
   4   5   0-0.57045 0.17816  -2
   4  -5   0-0.57045 0.17816   1
   4   5   1 1.42709 0.21107   1
   4  -5   2 1.02832 0.23656   1
   4  -5   3 0.55506 0.30240   1
  -7   5   4 2852.43 2.93105  -2
  -4  -5  -4 2852.43 2.93105   1
   4   5   5 1.10966 0.35292   1
  -8   5   5 17.2236 1.62776  -2
  -4  -5  -5 17.2236 1.62776   1
  -4  -5  -6-0.47604 0.31430   1
  -4  -5  -7 0.25003 0.41001   1
  10  -5  -8 2.49358 0.56128  -2
   4   5   8 2.49358 0.56128   1
  -4   5  -9 1.57614 1.39474   1
  11  -5  -9 26.7481 0.67903  -2
   4   5   9 26.7481 0.67903   1
   4  -5  10 1.81841 0.45887   1
  -4  -5 -11-3.22645 0.47910   1
 -13  -5  12 7365.06 7.24091  -2
  -4   5 -12 7365.06 7.24091   1
 -14  -5  13 2.46651 0.71043  -2
  -4   5 -13 2.46651 0.71043   1
  -4  -5 -14-3.19935 0.90483   1
  -4   5 -15 3.63894 1.13978   1
  15   5 -15 1192.94 6.83305  -2
   4  -5  15 1192.94 6.83305   1
 -16   5  16 6.36610 1.09639  -2
  -4  -5 -16 6.36610 1.09639   1
  17   5 -17 3317.27 6.45630  -2
   4  -5  17 3317.27 6.45630   1
  -4   5 -18-3.31991 0.88504   1
  -4  -5 -19 5.38903 1.46529   1
  18  -5 -19 5.49459 1.75090  -2
   4   5  19 5.49459 1.75090   1
  19  -5 -20 4019.74 8.87928  -2
   4   5  20 4019.74 8.87928   1
   4   6 -22 4263.61 10.7532   1
  13  -6 -22 4258.06 14.6364  -2
  -4   6  22 4258.06 14.6364   1
  12   6 -21 5337.27 13.8656  -2
  -4  -6  21 5337.27 13.8656   1
  11  -6 -20 359.207 3.54158  -2
  -4   6  20 359.207 3.54158   1
   4   6 -19 2993.64 9.01606   1
  -4  -6  18 6365.35 12.5834   1
 -10   6  18 6502.49 16.9527  -2
   4  -6 -18 6502.49 16.9527   1
   9   6 -17 567.884 3.56965  -2
  -4  -6  17 567.884 3.56965   1
  -8   6  16 4027.49 8.38291  -2
   4  -6 -16 4027.49 8.38291   1
   4   6 -15 34126.8 17.9817   1
   4  -6 -14 544.844 1.76990   1
  -6   6  13 9325.95 6.43854  -2
   4  -6 -13 9325.95 6.43854   1
   5  -6 -12 373.721 1.94622  -2
  -4   6  12 373.721 1.94622   1
   4   6 -11 700.069 1.89651   1
  -4   6  11 1032.82 5.40452  -2
   4  -6 -11 1032.82 5.40452   1
  -4   6  10 90305.1 16.7734   1
   4   6  -9 1090.37 2.44246   1
  -3   6   9 1109.15 2.73829  -2
   4  -6  -9 1109.15 2.73829   1
   2   6  -8 5704.75 5.45763  -2
  -4  -6   8 5704.75 5.45763   1
   4  -6  -7 5861.24 3.76599   1
   4  -6  -6 3119.69 2.61452   1
  -4   6   5 118413. 19.2253   1
   0   6   5 156606. 47.1403  -2
   4  -6  -5 156606. 47.1403   1
  -1   6  -4 16625.5 7.38197  -2
  -4  -6   4 16625.5 7.38197   1
  -4  -6   3 49879.6 8.45534   1
  -4   6   2 13192.0 4.61697   1
   4  -6  -1 8506.73 3.72037   1
   4  -6   0 39497.0 8.72665  -2
   4   6   0 39497.0 8.72665   1
  -4   6  -1 40278.9 7.26768   1
  -4   6  -2 7987.73 3.32412   1
   4  -6   3 126579. 15.3007   1
  -7   6   4 2303.01 2.65394  -2
  -4  -6  -4 2303.01 2.65394   1
  -4   6  -5 3442.37 3.07652   1
  -8   6   5 3430.22 4.94701  -2
  -4  -6  -5 3430.22 4.94701   1
  -4  -6  -6 6618.48 4.21374   1
  -4  -6  -7 3782.39 3.34932   1
  10  -6  -8 50335.9 16.7575  -2
   4   6   8 50335.9 16.7575   1
  11  -6  -9 20629.2 8.02290  -2
   4   6   9 20629.2 8.02290   1
   4   6  10 2520.12 3.14184   1
   4   6  11 16658.2 8.84238   1
 -12  -6  11 18371.0 22.9006  -2
  -4   6 -11 18371.0 22.9006   1
 -13  -6  12 3229.22 4.95756  -2
  -4   6 -12 3229.22 4.95756   1
 -14  -6  13 13728.8 9.27528  -2
  -4   6 -13 13728.8 9.27528   1
   4  -6  14 10206.1 10.3853   1
   4   6  15 2567.94 6.39008   1
  15   6 -15 2259.38 9.47952  -2
   4  -6  15 2259.38 9.47952   1
  16   6 -16 14845.2 17.0957  -2
   4  -6  16 14845.2 17.0957   1
 -17  -6  17 7740.04 9.42535  -2
  -4   6 -17 7740.04 9.42535   1
   4   6  18 645.441 2.90699   1
  -4  -6 -19 9080.93 15.5111   1
  18   6 -19 9646.80 15.9185  -2
   4  -6  19 9646.80 15.9185   1
 -19   6  20 7450.76 12.5196  -2
  -4  -6 -20 7450.76 12.5196   1
 -12  -7  21 9.27705 1.98168  -2
   4   7 -21 9.27705 1.98168   1
  11  -7 -20 1681.58 7.37068  -2
  -4   7  20 1681.58 7.37068   1
  -4  -7  19 0.13823 1.37985   1
  -4  -7  18 3.24584 1.16145   1
  -9  -7  17 2880.99 7.21915  -2
   4   7 -17 2880.99 7.21915   1
  -8  -7  16 2.55046 1.74819  -2
   4   7 -16 2.55046 1.74819   1
   4   7 -15-19.1411 1.78071   1
  -7   7  15 6351.26 15.9190  -2
   4  -7 -15 6351.26 15.9190   1
   4  -7 -14-0.66897 1.21813   1
  -6  -7  13-0.41638 0.74642  -2
   4   7 -13-0.41638 0.74642   1
  -5  -7  12 330.300 1.95895  -2
   4   7 -12 330.300 1.95895   1
  -4   7  11 3.67239 0.57479   1
  -4   7  10 1.54590 0.55346   1
  -4  -7   9 4.10884 1.00119   1
  -3   7   9 23.3633 0.81879  -2
   4  -7  -9 23.3633 0.81879   1
   2   7  -8 3.37331 0.58064  -2
  -4  -7   8 3.37331 0.58064   1
  -4  -7   7 1.91302 0.48988   1
   4   7  -6 2.05879 0.43999   1
   4   7  -5 1.67203 0.51166   1
   0   7   5 1.74793 0.78843  -2
   4  -7  -5 1.74793 0.78843   1
  -1   7  -4 1907.22 3.05020  -2
  -4  -7   4 1907.22 3.05020   1
  -4  -7   3 0.26362 0.31869   1
   4  -7  -2-0.09821 0.32247   1
  -4  -7   1-0.42630 0.26370   1
   4   7   0 2.70247 0.30448  -2
   4  -7   0 2.70247 0.30448   1
   4   7   1 0.35788 0.44133   1
   5  -7  -1 140.594 1.30861  -2
   4   7   1 140.594 1.30861   1
   4  -7   2 3.36109 0.34060   1
   4   7   3-0.46013 0.33272   1
  -7   7   4 747.747 1.96878  -2
  -4  -7  -4 747.747 1.96878   1
  -4   7  -5-1.78115 0.48749   1
  -8   7   5 8.31903 1.35541  -2
  -4  -7  -5 8.31903 1.35541   1
  -4   7  -6 0.70276 0.46526   1
  -4  -7  -7 6.22146 0.48904   1
  10   7  -8 2.54541 0.68430  -2
   4  -7   8 2.54541 0.68430   1
  -4  -7  -9 4.80335 0.78694   1
  11  -7  -9 128.419 1.40603  -2
   4   7   9 128.419 1.40603   1
   4   7  10 1.83971 0.56063   1
  -4  -7 -11 5.43119 0.66485   1
 -12  -7  11 11.1251 1.38821  -2
  -4   7 -11 11.1251 1.38821   1
 -13   7  12 1750.08 4.87718  -2
  -4  -7 -12 1750.08 4.87718   1
  14  -7 -13-2.42384 1.25884  -2
   4   7  13-2.42384 1.25884   1
  -4  -7 -14 1.39948 0.92862   1
  -4   7 -15-3.00103 1.22007   1
  15   7 -15 6729.23 12.2206  -2
   4  -7  15 6729.23 12.2206   1
 -16   7  16-2.00268 1.42671  -2
  -4  -7 -16-2.00268 1.42671   1
 -17  -7  17 2567.09 5.70314  -2
  -4   7 -17 2567.09 5.70314   1
  -4   7 -18 1.10781 0.92203   1
  -4   7 -19-6.15197 1.27604   1
  18  -7 -19 12.7537 1.77568  -2
   4   7  19 12.7537 1.77568   1
  11  -8 -20 15.2536 1.61260  -2
  -4   8  20 15.2536 1.61260   1
   4   8 -19 39.4746 1.40088   1
  10  -8 -19 89.4634 3.11111  -2
  -4   8  19 89.4634 3.11111   1
   4   8 -18 59.9516 1.82856   1
  -9   8  17 8720.98 15.7931  -2
   4  -8 -17 8720.98 15.7931   1
   8   8 -16 4580.50 11.4149  -2
  -4  -8  16 4580.50 11.4149   1
  -4  -8  15 15792.2 19.0426   1
  -7   8  15 15793.8 26.6518  -2
   4  -8 -15 15793.8 26.6518   1
  -4  -8  14 2056.77 5.59967   1
  -6   8  13 3985.27 7.50408  -2
   4  -8 -13 3985.27 7.50408   1
   5  -8 -12 716.647 3.66276  -2
  -4   8  12 716.647 3.66276   1
   4   8 -11 60.5984 0.95757   1
  -4   8  11 59.0854 3.15978  -2
   4  -8 -11 59.0854 3.15978   1
   4   8 -10 44629.4 15.5377   1
  -3   8   9 7870.79 6.05106  -2
   4  -8  -9 7870.79 6.05106   1
   2   8  -8 9226.11 8.84861  -2
  -4  -8   8 9226.11 8.84861   1
  -4   8   7 48.0983 0.73996   1
   1   8  -7 48.9655 1.66461  -2
  -4  -8   7 48.9655 1.66461   1
  -4  -8   6 16729.4 7.57392   1
  -4  -8   5 87264.6 25.6587   1
   0   8   5 114539. 23.8499  -2
   4  -8  -5 114539. 23.8499   1
   1   8   4 197.154 1.05807  -2
   4  -8  -4 197.154 1.05807   1
   4   8  -3 495.203 1.52228   1
   2   8   3 717.216 3.63910  -2
   4  -8  -3 717.216 3.63910   1
  -4   8   2 3591.65 3.43407   1
   4  -8  -1 79.5643 0.57676   1
  -4  -8   0 429.969 1.73952  -2
  -4   8   0 429.969 1.73952   1
   4  -8   1 156.464 0.79359   1
   5  -8  -1 142.345 1.94326  -2
   4   8   1 142.345 1.94326   1
  -4  -8  -2 170.987 0.78301   1
   4   8   3 56021.9 15.8906   1
   6   8  -3 68871.4 36.2687  -2
   4  -8   3 68871.4 36.2687   1
   7  -8  -4 4394.42 5.29842  -2
   4   8   4 4394.42 5.29842   1
   4  -8   5 1442.06 3.31566   1
   8   8  -5 1427.00 3.48370  -2
   4  -8   5 1427.00 3.48370   1
  -4  -8  -6 3070.21 3.39406   1
   4  -8   7 91.9296 0.88554   1
   9  -8  -7 58.3844 1.79625  -2
   4   8   7 58.3844 1.79625   1
 -10   8   8 26290.7 15.3339  -2
  -4  -8  -8 26290.7 15.3339   1
 -11   8   9 1011.47 2.38565  -2
  -4  -8  -9 1011.47 2.38565   1
   4  -8  10 2619.67 4.82799   1
  -4   8 -11 9229.96 12.7474   1
  12   8 -11 10776.6 14.1147  -2
   4  -8  11 10776.6 14.1147   1
 -13  -8  12 5720.43 10.0132  -2
  -4   8 -12 5720.43 10.0132   1
 -14   8  13 10310.1 10.2697  -2
  -4  -8 -13 10310.1 10.2697   1
  -4   8 -14 17844.5 14.3541   1
  -4  -8 -15 17284.9 19.9323   1
  15  -8 -15 17958.9 20.7216  -2
   4   8  15 17958.9 20.7216   1
 -16  -8  16 4916.64 11.7775  -2
  -4   8 -16 4916.64 11.7775   1
 -17  -8  17 94.4176 1.65690  -2
  -4   8 -17 94.4176 1.65690   1
  -4  -8 -18 1514.36 4.48452   1
   4   9 -19 1.07571 1.94581   1
  10   9 -19 12.1894 2.74808  -2
  -4  -9  19 12.1894 2.74808   1
   4   9 -18-1.83120 1.13385   1
   9   9 -17 2235.95 8.05726  -2
  -4  -9  17 2235.95 8.05726   1
  -8   9  16 5.38738 1.91675  -2
   4  -9 -16 5.38738 1.91675   1
  -4  -9  15-6.29139 1.34095   1
  -7   9  15-1.27370 3.13535  -2
   4  -9 -15-1.27370 3.13535   1
   4   9 -14 1.70098 1.11072   1
   6   9 -13-0.05300 1.81249  -2
  -4  -9  13-0.05300 1.81249   1
  -5  -9  12 1533.25 6.21703  -2
   4   9 -12 1533.25 6.21703   1
   4   9 -11-2.99700 1.26188   1
  -4   9  11 9.79329 2.91061  -2
   4  -9 -11 9.79329 2.91061   1
   4   9 -10 3.90196 0.74787   1
  -3   9   9 42.4841 0.99439  -2
   4  -9  -9 42.4841 0.99439   1
   2   9  -8 5.96179 0.69449  -2
  -4  -9   8 5.96179 0.69449   1
  -4   9   7 0.67630 0.71421   1
   1   9  -7 5.85532 1.00325  -2
  -4  -9   7 5.85532 1.00325   1
  -4  -9   6 2.25768 0.48729   1
  -4   9   5 8.28217 0.70438   1
   0   9   5 7.03862 1.26476  -2
   4  -9  -5 7.03862 1.26476   1
   1  -9   4 414.904 1.87862  -2
   4   9  -4 414.904 1.87862   1
   4  -9  -3-1.88983 0.45862   1
   4  -9  -2 1.61177 0.54644   1
  -4  -9   1 3.35457 0.65518   1
   4   9   0 2.94506 0.55532  -2
   4  -9   0 2.94506 0.55532   1
   4   9   1-0.40837 0.53201   1
  -5  -9   1 17.8260 1.20866  -2
  -4   9  -1 17.8260 1.20866   1
   4   9   2 4.23008 0.46222   1
   4   9   3 1.11073 0.49533   1
   7  -9  -4 2692.80 4.82926  -2
   4   9   4 2692.80 4.82926   1
  -4  -9  -5-2.40006 1.01092   1
   8  -9  -5-2.20958 1.30071  -2
   4   9   5-2.20958 1.30071   1
  -4  -9  -6-0.67705 0.63253   1
  -4  -9  -7-2.47542 1.10654   1
   9   9  -7 22.3377 1.36500  -2
   4  -9   7 22.3377 1.36500   1
 -10   9   8-4.67247 1.21442  -2
  -4  -9  -8-4.67247 1.21442   1
  -4  -9  -9-1.06454 1.77115   1
  11  -9  -9 34.2923 1.94985  -2
   4   9   9 34.2923 1.94985   1
   4  -9  10 0.85824 1.03776   1
  -4  -9 -11-7.24649 1.25017   1
  12   9 -11-0.66517 2.84360  -2
   4  -9  11-0.66517 2.84360   1
 -13   9  12 4136.80 10.2753  -2
  -4  -9 -12 4136.80 10.2753   1
  -4   9 -13 2.11382 1.55811   1
  14   9 -13 2.79356 1.37358  -2
   4  -9  13 2.79356 1.37358   1
   4  -9  14 0.80939 1.06018   1
  -4  -9 -15 2.57009 1.53727   1
  15   9 -15 1536.60 6.33077  -2
   4  -9  15 1536.60 6.33077   1
  16   9 -16-3.36069 1.38686  -2
   4  -9  16-3.36069 1.38686   1
 -17   9  17 2473.35 10.3959  -2
  -4  -9 -17 2473.35 10.3959   1
  -4 -10  18 7132.38 13.8917   1
  10 -10 -18 9171.89 23.0676  -2
  -4  10  18 9171.89 23.0676   1
   9  10 -17 901.985 5.00717  -2
  -4 -10  17 901.985 5.00717   1
  -8 -10  16 222.015 2.82007  -2
   4  10 -16 222.015 2.82007   1
   4  10 -15 4011.26 14.6468   1
  -7  10  15 3978.07 14.4074  -2
   4 -10 -15 3978.07 14.4074   1
   4  10 -14 153.145 1.93896   1
  -6 -10  13 12970.3 14.0067  -2
   4  10 -13 12970.3 14.0067   1
  -5 -10  12 4862.64 10.0523  -2
   4  10 -12 4862.64 10.0523   1
   4  10 -11 69.1954 2.94355   1
  -4  10  11 90.7300 2.11645  -2
   4 -10 -11 90.7300 2.11645   1
   4 -10 -10 125039. 40.0902   1
  -3  10   9 233.140 1.98482  -2
   4 -10  -9 233.140 1.98482   1
  -2  10   8 189.407 1.92038  -2
   4 -10  -8 189.407 1.92038   1
  -4 -10   7 6746.88 15.3675   1
  -1  10   7 6094.34 7.84932  -2
   4 -10  -7 6094.34 7.84932   1
   4 -10  -6 5313.92 6.45527   1
   0  10   5 11052.3 9.96202  -2
   4 -10  -5 11052.3 9.96202   1
  -1  10  -4 6882.97 10.9521  -2
  -4 -10   4 6882.97 10.9521   1
  -4 -10   3 36306.3 31.8776   1
  -2  10  -3 43289.6 32.5439  -2
  -4 -10   3 43289.6 32.5439   1
   4  10  -2 19465.0 13.2271   1
  -4 -10   1 9077.27 8.92499   1
   4 -10   0 52312.7 26.3737  -2
   4  10   0 52312.7 26.3737   1
  -4 -10  -1 27552.0 19.7587   1
   4  10   2 3264.10 5.51142   1
  -4  10  -3 16827.2 10.7928   1
   6 -10  -3 19858.9 23.5781  -2
   4  10   3 19858.9 23.5781   1
   7  10  -4 1947.04 4.29380  -2
   4 -10   4 1947.04 4.29380   1
  -4 -10  -5 5050.51 9.05810   1
  -8 -10   5 5174.41 7.12424  -2
  -4  10  -5 5174.41 7.12424   1
  -4  10  -6 31.1344 0.74922   1
  -4 -10  -7 332.263 2.71080   1
   9  10  -7 311.213 3.75429  -2
   4 -10   7 311.213 3.75429   1
  10 -10  -8 101265. 47.0783  -2
   4  10   8 101265. 47.0783   1
  -4 -10  -9 11462.9 20.0141   1
  11  10  -9 11015.7 14.7250  -2
   4 -10   9 11015.7 14.7250   1
   4 -10  10 12114.2 12.9611   1
  -4 -10 -11 24291.4 30.1396   1
  12  10 -11 27051.5 24.0253  -2
   4 -10  11 27051.5 24.0253   1
  13 -10 -12 1875.51 9.22492  -2
   4  10  12 1875.51 9.22492   1
 -14  10  13 107.418 1.56408  -2
  -4 -10 -13 107.418 1.56408   1
   4  10  14 1848.97 5.59876   1
  15  10 -15 317.326 4.35977  -2
   4 -10  15 317.326 4.35977   1
  16  10 -16 10083.4 22.4310  -2
   4 -10  16 10083.4 22.4310   1
   9 -11 -17 852.832 3.98882  -2
  -4  11  17 852.832 3.98882   1
   8 -11 -16 2.65160 1.61548  -2
  -4  11  16 2.65160 1.61548   1
   4  11 -15 5.43122 2.23235   1
   7  11 -15 2178.64 9.88355  -2
  -4 -11  15 2178.64 9.88355   1
   4  11 -14 3.32496 1.40826   1
  -7  11  14 314.801 4.54579  -2
   4 -11 -14 314.801 4.54579   1
   6  11 -13-8.40348 1.23604  -2
  -4 -11  13-8.40348 1.23604   1
  -5  11  12 216.953 2.68604  -2
   4 -11 -12 216.953 2.68604   1
   4  11 -11 6.91611 1.85746   1
   4  11 -11 10.8527 1.48951  -2
  -4 -11  11 10.8527 1.48951   1
  -4 -11  10 2.01814 0.91857   1
  -3  11   9 593.001 2.97174  -2
   4 -11  -9 593.001 2.97174   1
  -2  11   8-1.08080 2.20476  -2
   4 -11  -8-1.08080 2.20476   1
  -4 -11   7-3.35175 1.88042   1
  -1  11   7 999.561 6.25351  -2
   4 -11  -7 999.561 6.25351   1
  -4 -11   6-2.74851 1.01254   1
  -4 -11   5-2.69332 1.90910   1
   0  11   5 3.13503 1.85530  -2
   4 -11  -5 3.13503 1.85530   1
  -1  11  -4 11.0688 1.29790  -2
  -4 -11   4 11.0688 1.29790   1
  -4 -11   3 10.6362 2.12968   1
  -2  11  -3-0.78140 1.68962  -2
  -4 -11   3-0.78140 1.68962   1
  -4 -11   2 2.25844 1.61894   1
  -4 -11   1 0.53218 1.65627   1
   4 -11   0 1.43184 1.28571  -2
   4  11   0 1.43184 1.28571   1
  -4 -11  -1-6.41434 0.97719   1
   4  11   2 1.71605 0.99928   1
  -4 -11  -3 0.27357 1.31973   1
   7  11  -4 19.0363 1.22190  -2
   4 -11   4 19.0363 1.22190   1
  -4 -11  -5 2.37883 1.19527   1
   8  11  -5 13.4950 1.17665  -2
   4 -11   5 13.4950 1.17665   1
   4 -11   6 2.22835 0.79571   1
   4 -11   7 5.12733 0.92864   1
   9 -11  -7 89.5879 2.44236  -2
   4  11   7 89.5879 2.44236   1
 -10  11   8 5.93025 0.99220  -2
  -4 -11  -8 5.93025 0.99220   1
  -4 -11  -9 7.59259 1.37041   1
  11  11  -9 34.5185 1.61470  -2
   4 -11   9 34.5185 1.61470   1
  -4 -11 -10 9.28956 0.84184   1
  -4 -11 -11-6.65702 1.45555   1
  12 -11 -11 13.1751 1.61185  -2
   4  11  11 13.1751 1.61185   1
  13  11 -12 1915.71 7.35758  -2
   4 -11  12 1915.71 7.35758   1
  14  11 -13-2.42109 1.85595  -2
   4 -11  13-2.42109 1.85595   1
   4  11  14 12.6779 1.09895   1
   4  12 -15 18113.8 31.7757   1
   7 -12 -15 18380.7 32.3890  -2
  -4  12  15 18380.7 32.3890   1
   4  12 -14 1171.49 5.37603   1
  -6 -12  13 1248.46 5.37866  -2
   4  12 -13 1248.46 5.37866   1
  -5  12  12 107.525 1.81598  -2
   4 -12 -12 107.525 1.81598   1
   4  12 -11 132.602 2.92553   1
  -4  12  11 139.285 3.07061  -2
   4 -12 -11 139.285 3.07061   1
   4 -12 -10 3431.85 9.09899   1
  -3  12   9 3183.55 14.6988  -2
   4 -12  -9 3183.55 14.6988   1
  -2  12   8 12961.7 22.1614  -2
   4 -12  -8 12961.7 22.1614   1
  -1  12   7 47.9159 2.04444  -2
   4 -12  -7 47.9159 2.04444   1
  -4 -12   6 9527.06 19.4369   1
   0  12  -5 113901. 61.3049  -2
  -4 -12   5 113901. 61.3049   1
  -1  12  -4 433.269 5.76078  -2
  -4 -12   4 433.269 5.76078   1
  -4 -12   3 469.118 4.53712   1
  -4 -12   2 424.224 4.20875   1
  -4 -12   1 123.401 2.31107   1
  -4  12   0 451.961 4.10616  -2
  -4 -12   0 451.961 4.10616   1
  -4 -12  -1 47.4423 1.68311   1
  -4 -12  -2 336.998 3.60111   1
  -4 -12  -3 58115.5 43.2694   1
  -7  12   4 2036.57 8.15349  -2
  -4 -12  -4 2036.57 8.15349   1
  -4 -12  -5 168.011 2.43384   1
  -4 -12  -6 6293.67 10.6250   1
  -4 -12  -7 43.1659 0.95972   1
   9 -12  -7 60.4427 2.53226  -2
   4  12   7 60.4427 2.53226   1
 -10  12   8 849.764 4.54312  -2
  -4 -12  -8 849.764 4.54312   1
  -4 -12  -9 466.949 4.18350   1
  11 -12  -9 456.868 3.38991  -2
   4  12   9 456.868 3.38991   1
   4  12  10 128.291 1.83128   1
   4 -12  11 2608.92 11.0579   1
  12 -12 -11 2850.80 12.5573  -2
   4  12  11 2850.80 12.5573   1
  14 -12 -13 15793.6 30.6267  -2
   4  12  13 15793.6 30.6267   1
   6 -13 -13-3.64305 2.99922  -2
  -4  13  13-3.64305 2.99922   1
   5 -13 -12 537.126 7.42347  -2
  -4  13  12 537.126 7.42347   1
   4  13 -11-7.30965 2.03288   1
   4  13 -10-1.97708 2.07715   1
  -3 -13   9 1341.53 5.98775  -2
   4  13  -9 1341.53 5.98775   1
  -2 -13   8 1.68404 2.21753  -2
   4  13  -8 1.68404 2.21753   1
   4  13  -7 3.63197 1.72006   1
  -4 -13   6 20.5388 1.60224   1
  -4 -13   5 3.81449 1.45172   1
  -1  13  -4 1013.68 8.61773  -2
  -4 -13   4 1013.68 8.61773   1
  -4 -13   2-13.9717 1.70802   1
  -4 -13   1 4.30754 1.47776   1
  -4  13   0 4.45544 1.33600  -2
  -4 -13   0 4.45544 1.33600   1
  -4 -13  -1 5.75059 1.48592   1
  -4 -13  -2-15.1730 1.57429   1
  -4 -13  -3 3.72271 1.59345   1
  11  13  -9 76.6882 2.43659  -2
   4 -13   9 76.6882 2.43659   1
   4 -13  10 0.67649 1.37273   1
   4 -13  11 0.33520 1.95863   1
  12 -13 -11 8.12549 3.05290  -2
   4  13  11 8.12549 3.05290   1
   5   0 -22-10.5891 1.70069   1
 -11   0  21 20.1718 2.49004  -2
   5   0 -21 20.1718 2.49004   1
 -10   0  20 394.672 5.92499  -2
   5   0 -20 394.672 5.92499   1
   5   0 -19-1.93282 1.17808   1
   5   0 -18 2.22337 1.17518   1
   8   0 -17 27.6386 0.92048  -2
  -5   0  17 27.6386 0.92048   1
  -7   0  16 15.1329 0.82894  -2
   5   0 -16 15.1329 0.82894   1
   5   0 -15 1.97281 0.68941   1
   5   0 -14-0.22573 0.65739   1
   5   0 -13 0.28141 1.17630   1
   5   0 -13 6.33159 0.70144  -2
  -5   0  13 6.33159 0.70144   1
  -4   0  12 10447.5 7.63264  -2
   5   0 -12 10447.5 7.63264   1
  -5   0  11 1.02811 0.39707   1
   5   0 -10-0.63852 0.44513   1
   5   0  -9 9.59972 0.63345   1
  -2   0   9 2323.97 5.54845  -2
   5   0  -9 2323.97 5.54845   1
  -1   0   8 1.22920 0.46712  -2
   5   0  -8 1.22920 0.46712   1
  -5   0   7 2.27455 0.39662   1
  -5   0   6 0.74437 0.67482   1
  -5   0   5 0.55066 0.43148   1
   2   0   4 1934.47 2.96839  -2
   5   0  -4 1934.47 2.96839   1
   5   0  -3 0.02010 0.41266   1
   5   0  -2 1.17585 0.38896   1
   5   0  -1 3.12099 0.44899   1
  -5   0   0 2.54531 0.52517  -2
  -5   0   0 2.54531 0.52517   1
   5   0   1 0.17844 0.40647   1
   5   0   2-0.10559 0.41241   1
   5   0   3-0.03447 0.40548   1
  -8   0   4 1208.81 2.64190  -2
  -5   0  -4 1208.81 2.64190   1
  -5   0  -5 0.51811 0.34917   1
  -5   0  -6 0.60849 0.32632   1
  -5   0  -7 0.91808 0.33788   1
  11   0  -8 0.33400 0.49147  -2
   5   0   8 0.33400 0.49147   1
   5   0   9-0.42218 0.44630   1
  12   0  -9 2542.18 4.96943  -2
   5   0   9 2542.18 4.96943   1
   5   0  10-0.50852 0.39990   1
   5   0  11 2.22891 0.44942   1
  14   0 -12 4735.27 6.48145  -2
   5   0  12 4735.27 6.48145   1
  15   0 -13 2.82360 0.76979  -2
   5   0  13 2.82360 0.76979   1
  -5   0 -14-6.06694 0.84111   1
  -5   0 -15 5.86121 2.15761   1
 -17   0  16 5.47224 2.76827  -2
  -5   0 -16 5.47224 2.76827   1
 -18   0  17 10.2694 2.67240  -2
  -5   0 -17 10.2694 2.67240   1
  -5   0 -18 4.42408 1.81702   1
  -5   0 -19-2.46030 2.05953   1
 -20   0  20 2508.50 14.3156  -2
  -5   0 -20 2508.50 14.3156   1
 -21   0  21 2.75365 2.85368  -2
  -5   0 -21 2.75365 2.85368   1
   5  -1 -23 2666.73 8.52196   1
   5   1 -22 446.619 3.57906   1
 -11  -1  21 123.578 2.35271  -2
   5   1 -21 123.578 2.35271   1
  10   1 -20 2701.99 7.98159  -2
  -5  -1  20 2701.99 7.98159   1
   5  -1 -19 2133.04 5.58644   1
  -5  -1  18 4873.18 8.12458   1
   8   1 -17 92.8901 0.88847  -2
  -5  -1  17 92.8901 0.88847   1
  -7   1  16 1987.88 3.81711  -2
   5  -1 -16 1987.88 3.81711   1
   5  -1 -15 1525.83 2.30933   1
   5   1 -14 65.7179 0.61776   1
   5  -1 -13 6336.04 13.3090   1
  -5   1  13 7674.50 4.30551  -2
   5  -1 -13 7674.50 4.30551   1
  -4  -1  12 12734.8 7.22425  -2
   5   1 -12 12734.8 7.22425   1
   5   1 -11 1017.19 1.40625   1
   5  -1 -10 30580.8 6.66810   1
  -5  -1   9 559.046 1.54770   1
  -2   1   9 500.282 2.07526  -2
   5  -1  -9 500.282 2.07526   1
  -1   1   8 7336.94 3.78570  -2
   5  -1  -8 7336.94 3.78570   1
  -5   1   7 6773.55 3.01959   1
  -5   1   6 2453.02 1.93596   1
  -5  -1   5 71175.6 9.69438   1
  -2  -1  -4 2807.34 2.32611  -2
  -5   1   4 2807.34 2.32611   1
  -5  -1   3 1685.18 2.23140   1
  -5  -1   2 5682.48 2.78971   1
  -5   1   1 271.902 0.92096   1
   5   1   0 19207.7 4.86021  -2
   5  -1   0 19207.7 4.86021   1
   5  -1   1 3517.19 1.76020   1
  -6   1   1 3450.20 5.08257  -2
  -5  -1  -1 3450.20 5.08257   1
   5  -1   2 9122.03 12.9854   1
   5  -1   3 37833.3 6.22723   1
   8  -1  -4 1509.86 1.89947  -2
   5   1   4 1509.86 1.89947   1
   5  -1   5 614.448 0.87131   1
   5   1   6 2461.26 1.72634   1
   5  -1   7 16490.7 4.70129   1
  11   1  -8 799.293 1.38417  -2
   5  -1   8 799.293 1.38417   1
  -5  -1  -9 3309.28 3.14416   1
 -12  -1   9 3206.17 2.99021  -2
  -5   1  -9 3206.17 2.99021   1
   5   1  10 188.287 1.18959   1
   5   1  11 11189.1 5.19566   1
 -14  -1  12 1534.69 2.80799  -2
  -5   1 -12 1534.69 2.80799   1
 -15   1  13 506.159 1.63204  -2
  -5  -1 -13 506.159 1.63204   1
  -5  -1 -14 3823.74 4.41182   1
  -5   1 -15 3402.89 6.63329   1
  16  -1 -15 3562.24 10.8337  -2
   5   1  15 3562.24 10.8337   1
 -17  -1  16 524.692 4.64095  -2
  -5   1 -16 524.692 4.64095   1
 -18  -1  17 67.4792 2.12276  -2
  -5   1 -17 67.4792 2.12276   1
  -5  -1 -18 1896.50 7.08052   1
  -5  -1 -19 127.188 2.13655   1
 -20   1  20 975.059 9.17263  -2
  -5  -1 -20 975.059 9.17263   1
 -21  -1  21 163.715 2.29874  -2
  -5   1 -21 163.715 2.29874   1
   5  -2 -23 6.25403 1.33095   1
  -5  -2  22-4.11968 1.05792   1
 -11   2  21 6.56751 1.41766  -2
   5  -2 -21 6.56751 1.41766   1
 -10   2  20 306.703 2.97648  -2
   5  -2 -20 306.703 2.97648   1
   5   2 -19-6.45425 1.01104   1
   5   2 -18-0.88961 1.00744   1
  -8   2  17 2386.11 3.77246  -2
   5  -2 -17 2386.11 3.77246   1
  -7  -2  16 0.96231 0.67668  -2
   5   2 -16 0.96231 0.67668   1
   5  -2 -15 3.36562 0.39899   1
   5   2 -14-3.55490 0.36560   1
   5   2 -13 3.11389 0.80975   1
  -5   2  13 3.93047 0.50440  -2
   5  -2 -13 3.93047 0.50440   1
  -4   2  12 1183.47 2.35151  -2
   5  -2 -12 1183.47 2.35151   1
  -5  -2  11 0.38521 0.33737   1
   5  -2 -10-2.49779 0.32740   1
   5  -2  -9 0.70985 0.26388   1
  -2   2   9 11.7348 0.75559  -2
   5  -2  -9 11.7348 0.75559   1
  -1  -2   8 2.75405 0.26730  -2
   5   2  -8 2.75405 0.26730   1
   5   2  -7 0.72060 0.31719   1
   5  -2  -6 0.59700 0.16370   1
  -5  -2   5 0.27336 0.21112   1
  -2   2  -4 57.8395 5.80991  -2
  -5  -2   4 57.8395 5.80991   1
  -5   2   3-2.30414 0.22960   1
   5  -2  -2 0.43175 0.22031   1
   5  -2  -1 0.01759 0.23650   1
  -5  -2   0 0.10955 0.24673  -2
  -5   2   0 0.10955 0.24673   1
   5  -2   1-0.00766 0.17331   1
  -5  -2  -2 0.54409 0.39809   1
   5   2   3 0.57348 0.37911   1
  -8   2   4 47.2346 0.35931  -2
  -5  -2  -4 47.2346 0.35931   1
  -5   2  -5 1.01608 0.20752   1
  -9   2   5-0.13859 0.77564  -2
  -5  -2  -5-0.13859 0.77564   1
  -5  -2  -6 2.25605 0.31565   1
  -5   2  -7-1.35660 0.25505   1
  11   2  -8 1.26905 0.42294  -2
   5  -2   8 1.26905 0.42294   1
   5   2   9 5.05902 0.69606   1
 -12   2   9 308.022 1.14636  -2
  -5  -2  -9 308.022 1.14636   1
  -5   2 -10-0.93560 0.40167   1
   5   2  11-0.28221 0.36021   1
 -14  -2  12 28.6860 0.74532  -2
  -5   2 -12 28.6860 0.74532   1
 -15   2  13 9.72984 0.60226  -2
  -5  -2 -13 9.72984 0.60226   1
   5  -2  14 3.21332 0.52640   1
  -5   2 -15-5.73780 1.57403   1
  16   2 -15 9327.70 9.65110  -2
   5  -2  15 9327.70 9.65110   1
  17   2 -16 5.19529 1.16238  -2
   5  -2  16 5.19529 1.16238   1
 -18  -2  17 38.3766 2.06360  -2
  -5   2 -17 38.3766 2.06360   1
  -5   2 -18 0.82229 1.45778   1
  -5  -2 -19 5.50982 1.26475   1
 -20   2  20 55.9744 1.96789  -2
  -5  -2 -20 55.9744 1.96789   1
  -5  -3  23 973.064 4.08765   1
   5  -3 -22 960.207 4.08013   1
 -11   3  21 2046.22 6.07675  -2
   5  -3 -21 2046.22 6.07675   1
  10   3 -20 921.905 6.21613  -2
  -5  -3  20 921.905 6.21613   1
   5  -3 -19 422.042 2.67334   1
   5  -3 -18 36955.9 19.3252   1
   8   3 -17 215.344 1.50644  -2
  -5  -3  17 215.344 1.50644   1
  -7   3  16 1960.79 3.87332  -2
   5  -3 -16 1960.79 3.87332   1
   5  -3 -15 14891.9 7.30866   1
  -5  -3  14 1490.61 2.25562   1
   5  -3 -13 31731.1 30.0079   1
  -5   3  13 37850.2 10.7041  -2
   5  -3 -13 37850.2 10.7041   1
   4   3 -12 4857.49 4.41250  -2
  -5  -3  12 4857.49 4.41250   1
   5  -3 -11 600.171 1.19378   1
  -5  -3  10 19689.3 6.13047   1
  -5   3   9 3790.03 2.91450   1
  -2  -3   9 3758.34 5.30232  -2
   5   3  -9 3758.34 5.30232   1
  -1   3   8 63940.3 13.0972  -2
   5  -3  -8 63940.3 13.0972   1
  -5  -3   7 33866.1 7.86423   1
  -5  -3   6 13572.8 4.66553   1
   5  -3  -5 18147.1 5.02919   1
   2  -3   4 15571.3 4.03059  -2
   5   3  -4 15571.3 4.03059   1
   5  -3  -3 42533.1 8.39462   1
  -5   3   2 58210.5 9.90774   1
  -5   3   1 2444.79 2.02610   1
   5  -3   0 174161. 20.7293  -2
   5   3   0 174161. 20.7293   1
  -5   3  -1 2574.76 1.22580   1
   5   3   2 19974.6 5.52010   1
  -5  -3  -3 264.243 0.89366   1
   8  -3  -4 773.327 1.43371  -2
   5   3   4 773.327 1.43371   1
   5   3   5 60198.6 12.5075   1
  -9   3   5 70621.4 17.8501  -2
  -5  -3  -5 70621.4 17.8501   1
   5  -3   6 3604.79 2.60365   1
  -5   3  -7 98.1081 1.04032   1
 -11   3   8 19271.5 8.51110  -2
  -5  -3  -8 19271.5 8.51110   1
   5   3   9 2113.70 3.15513   1
 -12  -3   9 2121.49 3.33570  -2
  -5   3  -9 2121.49 3.33570   1
  -5  -3 -10 17415.2 6.95965   1
   5  -3  11 2518.41 3.20489   1
  13  -3 -11 3378.29 10.2039  -2
   5   3  11 3378.29 10.2039   1
  14  -3 -12 3640.45 4.82643  -2
   5   3  12 3640.45 4.82643   1
   5   3  13 83.6058 1.89212   1
  15   3 -13 171.451 1.11362  -2
   5  -3  13 171.451 1.11362   1
  -5  -3 -14 2928.02 3.93054   1
  -5  -3 -15 7539.55 9.87074   1
  16  -3 -15 7850.48 17.3833  -2
   5   3  15 7850.48 17.3833   1
 -17  -3  16 18635.7 18.1212  -2
  -5   3 -16 18635.7 18.1212   1
 -18  -3  17 3223.50 6.10659  -2
  -5   3 -17 3223.50 6.10659   1
  -5   3 -18 14289.4 15.0460   1
  -5   3 -19 191.303 3.60310   1
 -20   3  20 2919.26 10.7507  -2
  -5  -3 -20 2919.26 10.7507   1
 -21  -3  21 6348.44 18.1710  -2
  -5   3 -21 6348.44 18.1710   1
   5   4 -22 6.05780 1.38911   1
  11   4 -21 8.96287 1.90758  -2
  -5  -4  21 8.96287 1.90758   1
 -10  -4  20 19.0272 1.33898  -2
   5   4 -20 19.0272 1.33898   1
   5   4 -19 7.31895 0.88501   1
  -9   4  19-2.20534 2.47628  -2
   5  -4 -19-2.20534 2.47628   1
   5   4 -18 7.27888 0.84557   1
  -8   4  17 279.791 1.96063  -2
   5  -4 -17 279.791 1.96063   1
  -7   4  16 3.80651 1.10640  -2
   5  -4 -16 3.80651 1.10640   1
   5  -4 -15 7.49633 0.54821   1
  -6   4  15 404.879 4.27420  -2
   5  -4 -15 404.879 4.27420   1
   5   4 -14 5.36834 0.46793   1
   5   4 -13 6.51206 0.53868  -2
  -5  -4  13 6.51206 0.53868   1
   4  -4 -12 4283.85 4.55514  -2
  -5   4  12 4283.85 4.55514   1
   5  -4 -11 2.57498 0.38944   1
   5  -4 -10-1.09446 0.38069   1
   5   4  -9 0.17826 0.39287   1
  -2   4   9 1240.53 2.50269  -2
   5  -4  -9 1240.53 2.50269   1
  -1   4   8 1.47762 0.41195  -2
   5  -4  -8 1.47762 0.41195   1
  -5  -4   7 0.58810 0.34855   1
  -5  -4   6 1.97703 0.31409   1
   5  -4  -5-0.37135 0.24750   1
  -2  -4  -4 1247.74 1.28522  -2
  -5   4   4 1247.74 1.28522   1
   5  -4  -3-0.02659 0.28024   1
   5   4  -2 1.02989 0.30497   1
   5  -4  -1 1.25508 0.31409   1
  -5   4   0 0.68274 0.20288  -2
  -5  -4   0 0.68274 0.20288   1
   5  -4   1 0.03289 0.17220   1
   6   4  -1 71.2325 0.55852  -2
   5  -4   1 71.2325 0.55852   1
  -5  -4  -2 1.67745 0.28219   1
  -5  -4  -3 0.31388 0.30521   1
  -8  -4   4 11.1355 0.62951  -2
  -5   4  -4 11.1355 0.62951   1
   5   4   5 0.53897 0.36490   1
  -9   4   5 2.23108 1.15427  -2
  -5  -4  -5 2.23108 1.15427   1
   5   4   6-0.88899 0.35635   1
  -5  -4  -7 1.67673 0.37111   1
 -11   4   8 2.86003 0.50278  -2
  -5  -4  -8 2.86003 0.50278   1
   5  -4   9 7.71501 0.63020   1
 -12  -4   9 2886.25 3.65858  -2
  -5   4  -9 2886.25 3.65858   1
   5  -4  10-0.02981 0.47342   1
  -5   4 -11 0.22459 0.48823   1
 -14   4  12 2534.22 4.25125  -2
  -5  -4 -12 2534.22 4.25125   1
 -15   4  13 3.14561 0.77808  -2
  -5  -4 -13 3.14561 0.77808   1
   5   4  14 3.31708 0.79575   1
   5   4  15 1.04578 1.13067   1
  16   4 -15 307.503 3.66438  -2
   5  -4  15 307.503 3.66438   1
 -17  -4  16 6.25677 0.99674  -2
  -5   4 -16 6.25677 0.99674   1
  18   4 -17 34.1870 1.12125  -2
   5  -4  17 34.1870 1.12125   1
  -5  -4 -18 11.0937 0.97839   1
  -5  -4 -19 0.61601 1.25901   1
  19  -4 -19 5.15843 1.89214  -2
   5   4  19 5.15843 1.89214   1
 -20  -4  20 1483.01 7.40834  -2
  -5   4 -20 1483.01 7.40834   1
   5   5 -22 306.002 2.95449   1
  11  -5 -21 1397.69 6.74318  -2
  -5   5  21 1397.69 6.74318   1
 -10  -5  20 11282.6 21.6181  -2
   5   5 -20 11282.6 21.6181   1
  -5  -5  19 3330.54 9.18927   1
  -9   5  19 4874.47 14.4562  -2
   5  -5 -19 4874.47 14.4562   1
  -5  -5  18 467.627 2.38814   1
  -8   5  17 40.5192 1.27682  -2
   5  -5 -17 40.5192 1.27682   1
  -7  -5  16 2065.78 5.89883  -2
   5   5 -16 2065.78 5.89883   1
   5  -5 -15 242.958 1.32639   1
  -6   5  15 231.851 3.73622  -2
   5  -5 -15 231.851 3.73622   1
  -5   5  14 397.961 1.49518   1
  -5  -5  13 68999.9 18.0005  -2
   5   5 -13 68999.9 18.0005   1
  -4   5  12 13755.7 8.90141  -2
   5  -5 -12 13755.7 8.90141   1
   5   5 -11 3460.51 3.33822   1
   5  -5 -10 22727.5 7.47598   1
  -5  -5   9 4682.06 5.14181   1
  -2   5   9 4499.53 3.94465  -2
   5  -5  -9 4499.53 3.94465   1
  -1  -5   8 81735.8 16.7960  -2
   5   5  -8 81735.8 16.7960   1
   5  -5  -7 44.1412 1.06069   1
   5  -5  -6 89.1982 0.55755   1
  -5   5   5 90247.3 11.5132   1
  -2  -5  -4 78.7617 0.53099  -2
  -5   5   4 78.7617 0.53099   1
   5  -5  -3 12591.1 4.32908   1
  -5  -5   2 4348.96 2.54748   1
  -5  -5   1 96.4015 0.53813   1
   4   5   1 103.030 1.19777  -2
   5  -5  -1 103.030 1.19777   1
   5  -5   0 10161.3 3.61102  -2
   5   5   0 10161.3 3.61102   1
  -5   5  -1 3960.85 2.12513   1
  -5  -5  -2 11948.8 4.49339   1
   5  -5   3 72225.0 12.2081   1
  -8  -5   4 1868.93 2.20182  -2
  -5   5  -4 1868.93 2.20182   1
  -5  -5  -5 41498.6 9.97514   1
  -9   5   5 55784.1 22.6513  -2
  -5  -5  -5 55784.1 22.6513   1
  -5  -5  -6 14259.6 5.53802   1
  -5  -5  -7 30578.8 8.44189   1
 -11  -5   8 2718.00 3.88119  -2
  -5   5  -8 2718.00 3.88119   1
   5  -5   9 3559.21 5.49667   1
 -12  -5   9 3644.43 4.35501  -2
  -5   5  -9 3644.43 4.35501   1
   5  -5  10 10635.2 6.31046   1
  -5  -5 -11 37736.3 12.2514   1
  14   5 -12 9493.16 8.28914  -2
   5  -5  12 9493.16 8.28914   1
   5   5  13 286.078 3.37882   1
 -15  -5  13 847.406 2.68658  -2
  -5   5 -13 847.406 2.68658   1
   5   5  14 3606.63 6.13546   1
   5  -5  15 881.573 3.66144   1
  16  -5 -15 983.070 7.17217  -2
   5   5  15 983.070 7.17217   1
 -17  -5  16 14392.0 16.4804  -2
  -5   5 -16 14392.0 16.4804   1
 -18  -5  17 928.974 3.41631  -2
  -5   5 -17 928.974 3.41631   1
   5  -5  18 152.454 1.47925   1
  -5   5 -19 43.1699 2.32771   1
  19   5 -19 697.411 4.06084  -2
   5  -5  19 697.411 4.06084   1
  20  -5 -20 194.121 2.29655  -2
   5   5  20 194.121 2.29655   1
   5   6 -22 23.0926 1.53572   1
  12  -6 -22 36.4045 3.20912  -2
  -5   6  22 36.4045 3.20912   1
 -11  -6  21 0.12642 1.96528  -2
   5   6 -21 0.12642 1.96528   1
 -10  -6  20 54.9834 1.96227  -2
   5   6 -20 54.9834 1.96227   1
  -5  -6  19 2.69738 0.96451   1
  -5  -6  18 5.41988 1.15531   1
  -8  -6  17 516.734 3.24256  -2
   5   6 -17 516.734 3.24256   1
  -7  -6  16 12.1648 1.68751  -2
   5   6 -16 12.1648 1.68751   1
   5   6 -15-2.00362 1.48031   1
  -6   6  15 1112.62 6.99626  -2
   5  -6 -15 1112.62 6.99626   1
   5   6 -14-0.62161 0.66405   1
   5   6 -13 8.57977 0.90001  -2
  -5  -6  13 8.57977 0.90001   1
  -4   6  12 71.4894 1.13977  -2
   5  -6 -12 71.4894 1.13977   1
  -5   6  11 1.16014 0.64138   1
  -3   6  11-0.97026 1.72060  -2
   5  -6 -11-0.97026 1.72060   1
  -5   6  10-0.50710 0.51005   1
   5   6  -9 0.96560 0.75363   1
   2  -6  -9 83.5238 1.27666  -2
  -5   6   9 83.5238 1.27666   1
   1   6  -8 0.81785 0.63225  -2
  -5  -6   8 0.81785 0.63225   1
   5   6  -7 0.53517 0.45501   1
  -5  -6   6 1.13059 0.42000   1
  -5   6   5-2.29429 0.36428   1
  -1   6  -5-2.05109 1.10910  -2
  -5  -6   5-2.05109 1.10910   1
  -2   6  -4 1167.45 2.14688  -2
  -5  -6   4 1167.45 2.14688   1
   5  -6  -3 0.81326 0.27735   1
   5   6  -2 0.66633 0.32116   1
   5  -6  -1 1.26756 0.31194   1
   4   6   1 10166.6 9.51136  -2
   5  -6  -1 10166.6 9.51136   1
   5  -6   0 1.43219 0.32153  -2
   5   6   0 1.43219 0.32153   1
   5  -6   1 1.63752 0.27912   1
  -5   6  -2 0.70831 0.21460   1
  -5  -6  -3 1.49652 0.37765   1
   8   6  -4 1627.63 2.52537  -2
   5  -6   4 1627.63 2.52537   1
  -5   6  -5-0.11389 0.40514   1
   9   6  -5 11.6652 0.72417  -2
   5  -6   5 11.6652 0.72417   1
   5   6   6 0.29736 0.32947   1
   5  -6   7 4.49679 0.41996   1
 -10   6   7 49.2186 2.19992  -2
  -5  -6  -7 49.2186 2.19992   1
 -11   6   8 2.04823 0.58271  -2
  -5  -6  -8 2.04823 0.58271   1
   5   6   9 6.94088 0.70927   1
  12  -6  -9 653.605 2.05885  -2
   5   6   9 653.605 2.05885   1
   5   6  10-1.86183 0.48578   1
  -5  -6 -11-1.23418 0.53022   1
 -14  -6  12 301.741 1.97216  -2
  -5   6 -12 301.741 1.97216   1
  15  -6 -13 8.69731 1.22437  -2
   5   6  13 8.69731 1.22437   1
  -5  -6 -14 5.97380 0.90993   1
  -5   6 -15 0.95165 0.82667   1
  17   6 -16-0.14447 1.16440  -2
   5  -6  16-0.14447 1.16440   1
 -18   6  17 33.1225 1.25167  -2
  -5  -6 -17 33.1225 1.25167   1
  -5  -6 -18 0.92406 0.91766   1
  19  -6 -19-3.32025 1.95351  -2
   5   6  19-3.32025 1.95351   1
  11  -7 -21 2970.56 8.06234  -2
  -5   7  21 2970.56 8.06234   1
  10   7 -20 1268.30 10.5740  -2
  -5  -7  20 1268.30 10.5740   1
   5   7 -19 193.584 2.60099   1
  -9   7  19 300.232 4.25428  -2
   5  -7 -19 300.232 4.25428   1
   5   7 -18 37269.7 30.9284   1
  -9   7  18 43836.3 45.2780  -2
   5  -7 -18 43836.3 45.2780   1
  -8   7  17 554.642 3.39196  -2
   5  -7 -17 554.642 3.39196   1
  -7  -7  16 874.282 5.11601  -2
   5   7 -16 874.282 5.11601   1
  -5  -7  15 12389.8 16.4929   1
  -6   7  15 12311.6 22.1553  -2
   5  -7 -15 12311.6 22.1553   1
   5  -7 -14 1788.94 5.12733   1
   5  -7 -13 50277.5 17.0819  -2
  -5   7  13 50277.5 17.0819   1
   4  -7 -12 1670.55 4.16362  -2
  -5   7  12 1670.55 4.16362   1
   5   7 -11 407.561 1.74461   1
  -3   7  11 679.550 5.17270  -2
   5  -7 -11 679.550 5.17270   1
   5   7 -10 12439.2 7.85469   1
  -5  -7   9 3646.81 6.73904   1
   2  -7  -9 3659.97 4.88519  -2
  -5   7   9 3659.97 4.88519   1
   1  -7  -8 85432.6 21.9169  -2
  -5   7   8 85432.6 21.9169   1
   5   7  -7 18734.9 8.37900   1
   0   7   7 18533.6 20.5812  -2
   5  -7  -7 18533.6 20.5812   1
   5   7  -6 6201.51 4.37401   1
   5  -7  -5 2895.48 5.55228   1
  -1   7  -5 3402.58 3.55247  -2
  -5  -7   5 3402.58 3.55247   1
  -2   7  -4 6675.59 5.38157  -2
  -5  -7   4 6675.59 5.38157   1
   5  -7  -3 52606.5 10.5493   1
   5  -7  -2 44786.6 9.41415   1
   5  -7  -1 759.531 1.24319   1
   4  -7   1 745.050 4.12058  -2
   5   7  -1 745.050 4.12058   1
   5  -7   0 128708. 20.2391  -2
   5   7   0 128708. 20.2391   1
   5  -7   1 114.139 0.75434   1
   6  -7  -1 78.9712 2.29306  -2
   5   7   1 78.9712 2.29306   1
   5   7   2 6906.78 4.32259   1
   5   7   3 1625.74 2.37855   1
   7   7  -3 2616.69 7.09840  -2
   5  -7   3 2616.69 7.09840   1
  -8  -7   4 76.7596 0.81590  -2
  -5   7  -4 76.7596 0.81590   1
  -5   7  -5 61154.7 20.7148   1
  -9   7   5 73438.8 23.0450  -2
  -5  -7  -5 73438.8 23.0450   1
   5  -7   6 7280.03 5.11470   1
   5  -7   7 217.039 1.11819   1
  10   7  -7 164.777 2.81117  -2
   5  -7   7 164.777 2.81117   1
 -11   7   8 16213.2 10.7857  -2
  -5  -7  -8 16213.2 10.7857   1
  -5  -7  -9 357.490 3.63162   1
  12   7  -9 369.079 1.52813  -2
   5  -7   9 369.079 1.52813   1
  -5  -7 -10 17033.5 9.00489   1
  -5  -7 -11 6845.41 9.05000   1
  13   7 -11 8536.83 12.2583  -2
   5  -7  11 8536.83 12.2583   1
  14   7 -12 5602.72 9.76442  -2
   5  -7  12 5602.72 9.76442   1
 -15  -7  13 134.063 1.52515  -2
  -5   7 -13 134.063 1.52515   1
   5   7  14 959.729 3.41027   1
   5   7  15 6040.40 9.91041   1
  16   7 -15 5854.08 15.5674  -2
   5  -7  15 5854.08 15.5674   1
 -17  -7  16 24422.5 22.2599  -2
  -5   7 -16 24422.5 22.2599   1
  18  -7 -17 4000.87 7.05240  -2
   5   7  17 4000.87 7.05240   1
  -5   7 -18 13490.4 13.4310   1
  -5  -7 -19 265.616 2.61286   1
  19   7 -19 339.378 2.95958  -2
   5  -7  19 339.378 2.95958   1
 -10  -8  20 312.957 3.93720  -2
   5   8 -20 312.957 3.93720   1
   5   8 -19-0.26448 1.31499   1
   5  -8 -18-1.49989 1.14406   1
  -8   8  17 1011.87 4.66585  -2
   5  -8 -17 1011.87 4.66585   1
  -7  -8  16 4.07496 1.49973  -2
   5   8 -16 4.07496 1.49973   1
   5   8 -15 1.31546 1.48921   1
  -6   8  15 207.142 4.28069  -2
   5  -8 -15 207.142 4.28069   1
   5  -8 -14 0.27723 1.27769   1
  -5   8  13-4.51889 1.56285  -2
   5  -8 -13-4.51889 1.56285   1
   4  -8 -12 145.614 1.87658  -2
  -5   8  12 145.614 1.87658   1
  -5   8  11 1.58457 0.63785   1
  -3   8  11 15.0954 2.50994  -2
   5  -8 -11 15.0954 2.50994   1
  -5   8  10-0.28433 0.53704   1
  -2   8   9 476.756 1.81050  -2
   5  -8  -9 476.756 1.81050   1
  -1   8   8 5.41568 0.68171  -2
   5  -8  -8 5.41568 0.68171   1
  -5  -8   7 1.76496 0.53237   1
   0   8  -7 146.988 1.75250  -2
  -5  -8   7 146.988 1.75250   1
  -5  -8   6 3.15989 0.44596   1
   5   8  -5 1.98969 0.65854   1
  -1   8  -5 1.82574 0.71063  -2
  -5  -8   5 1.82574 0.71063   1
   2   8   4 555.836 2.01486  -2
   5  -8  -4 555.836 2.01486   1
  -5   8   3-4.02302 0.47100   1
   3   8   3-0.90065 1.37399  -2
   5  -8  -3-0.90065 1.37399   1
   5  -8  -2-0.03154 0.36161   1
   5  -8  -1 2.18367 0.41662   1
  -5   8   0-0.06487 0.44984  -2
  -5  -8   0-0.06487 0.44984   1
  -5  -8  -1 3.47373 0.39280   1
   6   8  -1 42.6414 1.47334  -2
   5  -8   1 42.6414 1.47334   1
  -5  -8  -2 2.00314 0.38124   1
   5   8   3 2.96409 0.40763   1
   7  -8  -3 15.0173 2.08933  -2
   5   8   3 15.0173 2.08933   1
   8   8  -4 764.020 2.32582  -2
   5  -8   4 764.020 2.32582   1
   5  -8   5 4.94814 0.66968   1
   9  -8  -5 1.65758 1.03171  -2
   5   8   5 1.65758 1.03171   1
   5  -8   6-0.24004 0.57726   1
   5  -8   7 0.33310 0.63884   1
  10   8  -7 18.5669 2.38102  -2
   5  -8   7 18.5669 2.38102   1
 -11  -8   8 5.91667 0.79496  -2
  -5   8  -8 5.91667 0.79496   1
  -5   8  -9-0.53309 1.23420   1
  12   8  -9 2415.51 4.03878  -2
   5  -8   9 2415.51 4.03878   1
   5  -8  10-0.00188 0.87389   1
  -5  -8 -11 1.23230 1.05793   1
  13   8 -11-0.40836 2.71477  -2
   5  -8  11-0.40836 2.71477   1
  14  -8 -12 396.804 2.87549  -2
   5   8  12 396.804 2.87549   1
 -15   8  13 10.2440 1.22987  -2
  -5  -8 -13 10.2440 1.22987   1
   5   8  14 1.93693 0.90938   1
  -5  -8 -15 13.3755 1.16636   1
  16   8 -15 1959.44 7.03852  -2
   5  -8  15 1959.44 7.03852   1
 -17   8  16-4.44932 1.59841  -2
  -5  -8 -16-4.44932 1.59841   1
  -5   8 -17 2.21079 2.01800   1
  18   8 -17 228.530 2.30293  -2
   5  -8  17 228.530 2.30293   1
  -5  -8 -18 8.73101 1.09877   1
   5   9 -19 1424.56 9.11975   1
   5   9 -18 103.807 1.88669   1
   8   9 -17 154.796 2.17551  -2
  -5  -9  17 154.796 2.17551   1
  -7   9  16 1737.35 7.36544  -2
   5  -9 -16 1737.35 7.36544   1
   5   9 -15 445.144 3.55735   1
  -6   9  15 448.863 5.31541  -2
   5  -9 -15 448.863 5.31541   1
  -5  -9  14 317.288 2.51610   1
   5   9 -13 31427.6 21.1977  -2
  -5  -9  13 31427.6 21.1977   1
  -4   9  12 7598.94 12.1527  -2
   5  -9 -12 7598.94 12.1527   1
   5   9 -11 540.416 3.42471   1
   3   9 -11 708.395 3.85910  -2
  -5  -9  11 708.395 3.85910   1
  -5   9  10 7574.68 7.40628   1
   2  -9  -9 1092.60 2.66763  -2
  -5   9   9 1092.60 2.66763   1
  -1   9   8 36718.3 16.6385  -2
   5  -9  -8 36718.3 16.6385   1
  -5  -9   7 728.219 2.77193   1
   0   9   7 758.200 2.70670  -2
   5  -9  -7 758.200 2.70670   1
   5  -9  -6 934.952 2.11427   1
   5   9  -5 46125.6 24.9806   1
   1   9   5 61864.0 19.4677  -2
   5  -9  -5 61864.0 19.4677   1
   2   9   4 1057.01 3.13899  -2
   5  -9  -4 1057.01 3.13899   1
   5   9  -3 6147.17 6.22334   1
   3   9   3 9144.04 14.3290  -2
   5  -9  -3 9144.04 14.3290   1
  -5  -9   2 131.112 1.09996   1
  -5   9   1 138.112 1.03733   1
   5   9   0 1026.70 3.55476  -2
   5  -9   0 1026.70 3.55476   1
  -5   9  -1 4680.58 4.63724   1
   5   9   2 8337.59 6.48966   1
  -5  -9  -3 22993.0 14.4148   1
   7  -9  -3 28155.4 27.4305  -2
   5   9   3 28155.4 27.4305   1
   8  -9  -4 1043.11 3.06302  -2
   5   9   4 1043.11 3.06302   1
  -5  -9  -5 10006.3 10.0705   1
   9  -9  -5 15306.3 14.6637  -2
   5   9   5 15306.3 14.6637   1
  -5  -9  -6 7782.99 7.09634   1
  -5  -9  -7 9467.83 10.4169   1
  10   9  -7 9912.62 12.4815  -2
   5  -9   7 9912.62 12.4815   1
  11   9  -8 618.069 3.84916  -2
   5  -9   8 618.069 3.84916   1
  12   9  -9 3351.68 6.41968  -2
   5  -9   9 3351.68 6.41968   1
   5  -9  10 3126.97 6.61679   1
  -5  -9 -11 17141.9 19.4716   1
  13   9 -11 20611.8 27.3119  -2
   5  -9  11 20611.8 27.3119   1
  14  -9 -12 3568.87 9.70356  -2
   5   9  12 3568.87 9.70356   1
 -15   9  13 312.792 2.65909  -2
  -5  -9 -13 312.792 2.65909   1
  -5  -9 -14 3794.47 8.05585   1
  -5  -9 -15 663.230 5.76409   1
  16  -9 -15 692.932 6.60571  -2
   5   9  15 692.932 6.60571   1
 -17   9  16 6146.97 16.6020  -2
  -5  -9 -16 6146.97 16.6020   1
  18  -9 -17 559.540 3.23757  -2
   5   9  17 559.540 3.23757   1
  -5 -10  18 16.0366 1.25469   1
   8  10 -17 4.47389 1.54731  -2
  -5 -10  17 4.47389 1.54731   1
  -7 -10  16 2.68534 1.18545  -2
   5  10 -16 2.68534 1.18545   1
   5  10 -15 9.73422 2.31208   1
   6  10 -15 471.940 3.68534  -2
  -5 -10  15 471.940 3.68534   1
   5  10 -14-6.77646 1.02154   1
  -5  10  13-3.93322 1.40010  -2
   5 -10 -13-3.93322 1.40010   1
  -4  10  12 968.869 5.14096  -2
   5 -10 -12 968.869 5.14096   1
   5  10 -11-2.26451 2.45136   1
   3  10 -11-5.71562 1.54641  -2
  -5 -10  11-5.71562 1.54641   1
   5 -10 -10 1.27262 1.01361   1
   2  10  -9 60.9706 1.45105  -2
  -5 -10   9 60.9706 1.45105   1
   1  10  -8 4.54433 0.94200  -2
  -5 -10   8 4.54433 0.94200   1
   5 -10  -7 2.99590 1.27306   1
   0  10  -7 1255.39 4.58930  -2
  -5 -10   7 1255.39 4.58930   1
  -5 -10   6-3.12821 0.77437   1
  -5 -10   5 2.42653 1.99203   1
   1  10   5 5.37602 1.17661  -2
   5 -10  -5 5.37602 1.17661   1
   2  10   4 531.315 3.21798  -2
   5 -10  -4 531.315 3.21798   1
   5  10  -3-12.2380 0.97382   1
  -3  10  -3 8.80769 1.29809  -2
  -5 -10   3 8.80769 1.29809   1
  -5 -10   2 1.36048 0.75796   1
  -5 -10   1 0.89861 0.73580   1
  -5  10   0 4.94732 1.06399  -2
  -5 -10   0 4.94732 1.06399   1
   5  10   1-0.14825 0.69075   1
  -5 -10  -2 1.68592 0.76525   1
  -5 -10  -3 0.15007 0.74727   1
   7 -10  -3 7.18919 1.05662  -2
   5  10   3 7.18919 1.05662   1
   8 -10  -4 1516.43 4.18934  -2
   5  10   4 1516.43 4.18934   1
  -5 -10  -5-6.05057 1.46354   1
  -9 -10   5 3.00986 0.99315  -2
  -5  10  -5 3.00986 0.99315   1
   5 -10   6 0.58346 0.81810   1
  -5 -10  -7 1.50514 1.86909   1
  10  10  -7 159.369 2.17710  -2
   5 -10   7 159.369 2.17710   1
  11 -10  -8 12.5365 1.74403  -2
   5  10   8 12.5365 1.74403   1
  -5 -10  -9-6.21816 1.91247   1
  12  10  -9 395.828 3.22829  -2
   5 -10   9 395.828 3.22829   1
  -5 -10 -10-3.05523 1.01078   1
  -5 -10 -11-23.7378 1.41411   1
  13 -10 -11 1.43347 1.89017  -2
   5  10  11 1.43347 1.89017   1
  14 -10 -12 487.484 3.83522  -2
   5  10  12 487.484 3.83522   1
  15  10 -13 20.3746 1.76205  -2
   5 -10  13 20.3746 1.76205   1
   5 -10  14 12.8462 1.01721   1
  -5 -10 -15 11.1088 1.59105   1
  16  10 -15 327.523 3.18067  -2
   5 -10  15 327.523 3.18067   1
  17 -10 -16 1.07383 1.84885  -2
   5  10  16 1.07383 1.84885   1
   8  11 -17 1247.33 5.84253  -2
  -5 -11  17 1247.33 5.84253   1
  -7 -11  16 72.2043 2.96370  -2
   5  11 -16 72.2043 2.96370   1
   5  11 -15 1143.44 8.17593   1
   6  11 -15 1234.72 5.49549  -2
  -5 -11  15 1234.72 5.49549   1
   5  11 -14 405.784 3.27591   1
  -6  11  14 486.400 5.48633  -2
   5 -11 -14 486.400 5.48633   1
  -5 -11  13 4496.11 10.8228  -2
   5  11 -13 4496.11 10.8228   1
  -4  11  12 1150.41 5.65336  -2
   5 -11 -12 1150.41 5.65336   1
   5  11 -11 417.728 4.89714   1
   3  11 -11 1225.69 5.00582  -2
  -5 -11  11 1225.69 5.00582   1
   5 -11 -10 9528.71 11.4221   1
  -2  11   9 177.928 2.58072  -2
   5 -11  -9 177.928 2.58072   1
  -1  11   8 11907.4 29.2348  -2
   5 -11  -8 11907.4 29.2348   1
  -5 -11   7 2290.67 9.68878   1
   0  11   7 2408.19 9.25144  -2
   5 -11  -7 2408.19 9.25144   1
   5 -11  -6 440.733 3.02012   1
  -5 -11   5 4722.99 13.0331   1
   1  11   5 5532.22 13.1987  -2
   5 -11  -5 5532.22 13.1987   1
  -2  11  -4 201.937 2.70318  -2
  -5 -11   4 201.937 2.70318   1
  -5 -11   3 12812.6 20.5073   1
  -3  11  -3 15757.6 20.7664  -2
  -5 -11   3 15757.6 20.7664   1
  -5 -11   2 2066.22 8.38937   1
   5  11  -1 35.4465 1.12867   1
  -5  11   0 22351.9 35.5648  -2
  -5 -11   0 22351.9 35.5648   1
   5  11   1 324.339 2.47435   1
  -5 -11  -2 973.426 5.83758   1
   5 -11   3 2380.64 6.10816   1
   8  11  -4 14.8026 1.24268  -2
   5 -11   4 14.8026 1.24268   1
  -5 -11  -5 4701.32 12.4274   1
   9  11  -5 6231.38 10.3638  -2
   5 -11   5 6231.38 10.3638   1
   5  11   6 1905.82 4.91325   1
  -5 -11  -7 1185.70 4.76740   1
  10 -11  -7 1111.63 7.01041  -2
   5  11   7 1111.63 7.01041   1
  11 -11  -8 2114.73 7.19090  -2
   5  11   8 2114.73 7.19090   1
  -5 -11  -9 24.4526 1.33093   1
  12  11  -9 20.4718 1.65567  -2
   5 -11   9 20.4718 1.65567   1
   5 -11  10 1356.87 4.53665   1
  -5 -11 -11 283.010 2.53487   1
  13 -11 -11 243.009 3.93802  -2
   5  11  11 243.009 3.93802   1
 -14  11  12 415.784 4.08442  -2
  -5 -11 -12 415.784 4.08442   1
  -5 -11 -13 44.6883 1.88716   1
  15 -11 -13 236.335 2.69196  -2
   5  11  13 236.335 2.69196   1
   5 -11  14 25.0561 1.05376   1
   5  12 -15 9.23286 2.31352   1
  -5 -12  14-0.99631 1.20590   1
   5  12 -13 1.46454 1.74106  -2
  -5 -12  13 1.46454 1.74106   1
  -4 -12  12 20.1277 1.65268  -2
   5  12 -12 20.1277 1.65268   1
   5  12 -11 7.62882 1.65507   1
  -3  12  11 22.7503 2.68102  -2
   5 -12 -11 22.7503 2.68102   1
   5 -12 -10 11.9482 1.20416   1
  -2  12   9 399.320 3.14874  -2
   5 -12  -9 399.320 3.14874   1
  -1  12   8-3.56758 1.89392  -2
   5 -12  -8-3.56758 1.89392   1
   0  12   7 160.429 2.86761  -2
   5 -12  -7 160.429 2.86761   1
  -5 -12   6-1.99773 2.17614   1
  -1  12  -5-13.3070 3.17605  -2
  -5 -12   5-13.3070 3.17605   1
  -2  12  -4 97.1967 2.78686  -2
  -5 -12   4 97.1967 2.78686   1
  -5 -12   3 4.81404 2.32806   1
  -5 -12   2 1.24600 1.63189   1
  -5 -12   1-4.48268 1.52413   1
  -5  12   0-0.66436 1.98373  -2
  -5 -12   0-0.66436 1.98373   1
  -5 -12  -1 12.5922 1.42288   1
  -5 -12  -2 17.8713 1.41266   1
  -5 -12  -3-9.06371 1.27177   1
  -8  12   4 450.614 5.39939  -2
  -5 -12  -4 450.614 5.39939   1
  -5 -12  -5 2.81223 1.24362   1
  -5 -12  -6-8.16263 0.98048   1
   5 -12   7 11.1760 0.99604   1
  10 -12  -7-1.28457 2.50338  -2
   5  12   7-1.28457 2.50338   1
  11 -12  -8 5.34560 1.20628  -2
   5  12   8 5.34560 1.20628   1
  -5 -12  -9 8.03947 1.59338   1
  12  12  -9 854.058 4.58035  -2
   5 -12   9 854.058 4.58035   1
   5  12  10-0.37318 0.98994   1
   5 -12  11 24.4362 1.19483   1
  13 -12 -11 6.24790 2.88320  -2
   5  12  11 6.24790 2.88320   1
  14 -12 -12 58.8313 2.94663  -2
   5  12  12 58.8313 2.94663   1
  15  12 -13-6.53040 1.79840  -2
   5 -12  13-6.53040 1.79840   1
  -5 -13  13 160.689 3.17682  -2
   5  13 -13 160.689 3.17682   1
  -4 -13  12 2916.93 15.8854  -2
   5  13 -12 2916.93 15.8854   1
   5  13 -11 264.102 3.67042   1
  -3  13  11 332.644 4.14739  -2
   5 -13 -11 332.644 4.14739   1
   5  13 -10 1492.25 8.70008   1
  -3  13  10 2102.50 9.75376  -2
   5 -13 -10 2102.50 9.75376   1
  -2 -13   9 112.626 2.01300  -2
   5  13  -9 112.626 2.01300   1
  -1 -13   8 313.498 3.82723  -2
   5  13  -8 313.498 3.82723   1
  -5 -13   6 2810.20 11.2865   1
  -5 -13   5 7263.56 17.6140   1
  -2  13  -4 3293.55 15.7108  -2
  -5 -13   4 3293.55 15.7108   1
  -5 -13   3 44.2189 2.42012   1
  -5 -13   2 6628.10 16.5563   1
  -5 -13   1 312.741 3.63373   1
  -5  13   0 8129.91 23.5854  -2
  -5 -13   0 8129.91 23.5854   1
  -5 -13  -1 3314.23 11.3771   1
  -5 -13  -2 5832.47 14.9004   1
  -5 -13  -3 43.7983 1.43016   1
  -8  13   4 382.175 5.00584  -2
  -5 -13  -4 382.175 5.00584   1
  -5 -13  -6 1170.41 6.76869   1
  12 -13  -9 2410.07 11.2700  -2
   5  13   9 2410.07 11.2700   1
   5  13  10 523.028 3.68114   1
   5 -13  11 1027.52 6.88357   1
   5  14 -11 16.1011 1.83935   1
   5  14 -10 15.3237 2.17822   1
  -2 -14   9 36.6508 2.68330  -2
   5  14  -9 36.6508 2.68330   1
  -1 -14   8 8.39053 2.44315  -2
   5  14  -8 8.39053 2.44315   1
   5  14  -7-5.25925 1.95085   1
  -5 -14   5 2.69037 1.79492   1
  -2  14  -4 295.620 4.72662  -2
  -5 -14   4 295.620 4.72662   1
  -5 -14   3 16.9194 1.71747   1
 -12   0  24 7192.73 23.8668  -2
   6   0 -24 7192.73 23.8668   1
   6   0 -23 6274.37 18.0281   1
   6   0 -22 246.897 3.63492   1
 -10   0  21 14420.0 25.7870  -2
   6   0 -21 14420.0 25.7870   1
  -9   0  20 875.047 8.33397  -2
   6   0 -20 875.047 8.33397   1
  -6   0  19 922.938 4.43782   1
  -6   0  18 39429.3 27.4967   1
   7   0 -17 2095.54 4.38369  -2
  -6   0  17 2095.54 4.38369   1
   6   0 -16 139570. 44.5906  -2
  -6   0  16 139570. 44.5906   1
   6   0 -15 2271.69 4.34852   1
   6   0 -14 101.399 1.10360   1
  -4   0  13 19233.4 9.13577  -2
   6   0 -13 19233.4 9.13577   1
   3   0 -12 12465.2 7.80697  -2
  -6   0  12 12465.2 7.80697   1
   6   0 -11 639.545 1.67287   1
   6   0 -10 3721.90 3.15516   1
   6   0  -9 4621.27 3.97160   1
  -1   0   9 4295.17 5.69239  -2
   6   0  -9 4295.17 5.69239   1
   0   0  -8 166726. 27.3822  -2
  -6   0   8 166726. 27.3822   1
  -6   0   7 7383.83 4.68791   1
  -6   0   6 9110.30 5.60954   1
  -6   0   5 534418. 40.8656   1
  -3   0  -4 2578.23 3.56018  -2
  -6   0   4 2578.23 3.56018   1
  -6   0   3 5106.75 3.64188   1
   6   0  -2 24261.3 7.77266   1
   6   0  -1 3088.02 2.75339   1
   6   0   0 4089.83 3.88235  -2
   6   0   0 4089.83 3.88235   1
  -6   0  -1 15178.8 6.30224   1
   6   0   2 428438. 33.8194   1
  -6   0  -3 28228.1 9.54858   1
   9   0  -4 32431.9 12.4906  -2
   6   0   4 32431.9 12.4906   1
   6   0   5 222074. 23.5754   1
   6   0   6 9064.42 4.59406   1
   6   0   7 4627.19 3.47357   1
  12   0  -8 22277.5 10.3536  -2
   6   0   8 22277.5 10.3536   1
   6   0   9 3194.61 3.79112   1
  13   0  -9 3283.83 5.89379  -2
   6   0   9 3283.83 5.89379   1
   6   0  10 14460.5 8.19666   1
   6   0  11 2569.98 3.65712   1
 -15   0  12 23138.1 16.8671  -2
  -6   0 -12 23138.1 16.8671   1
 -16   0  13 156603. 34.6023  -2
  -6   0 -13 156603. 34.6023   1
  -6   0 -14 3425.56 6.50789   1
  -6   0 -15 17676.3 27.2312   1
 -18   0  16 571.783 6.85935  -2
  -6   0 -16 571.783 6.85935   1
 -19   0  17 5322.54 15.7685  -2
  -6   0 -17 5322.54 15.7685   1
  -6   0 -18 16821.0 29.3744   1
  -6   0 -19 1802.18 10.0807   1
 -21   0  20 2433.98 14.1643  -2
  -6   0 -20 2433.98 14.1643   1
 -22   0  21 4331.32 14.9604  -2
  -6   0 -21 4331.32 14.9604   1
 -12  -1  24 0.69180 2.67804  -2
   6   1 -24 0.69180 2.67804   1
   6  -1 -23-5.36241 1.56769   1
   6   1 -22-6.37556 1.28327   1
  10   1 -21-5.99309 1.57484  -2
  -6  -1  21-5.99309 1.57484   1
   9   1 -20 6059.11 11.9805  -2
  -6  -1  20 6059.11 11.9805   1
  -6  -1  19 6.30251 0.98857   1
   6   1 -18-0.26339 0.80416   1
  -7   1  17 1400.97 2.70404  -2
   6  -1 -17 1400.97 2.70404   1
  -6  -1  16 1.90814 0.71956  -2
   6   1 -16 1.90814 0.71956   1
   6   1 -15 1.64089 0.40099   1
  -6  -1  14 3.52138 0.40024   1
   6  -1 -13-2.30451 1.29103   1
   4  -1 -13 1.54763 0.49406  -2
  -6   1  13 1.54763 0.49406   1
  -3   1  12 8109.34 5.95502  -2
   6  -1 -12 8109.34 5.95502   1
   6   1 -11 1.73389 0.27220   1
   6  -1 -10 1.58901 0.27488   1
  -6   1   9 0.89094 0.27851   1
  -1  -1   9 2070.86 3.75581  -2
   6   1  -9 2070.86 3.75581   1
   0  -1  -8 2.32726 0.35077  -2
  -6   1   8 2.32726 0.35077   1
   6  -1  -7 0.32586 0.23776   1
  -6  -1   6 1.05588 0.27431   1
  -6  -1   5 0.45623 0.30446   1
  -3  -1  -4 552.833 1.23414  -2
  -6   1   4 552.833 1.23414   1
   6  -1  -3 0.06216 0.29405   1
  -6   1   2 1.26616 0.28274   1
   6   1  -1 1.74377 0.29040   1
   6  -1   0 0.60589 0.41265  -2
   6   1   0 0.60589 0.41265   1
   6  -1   1 2.60103 0.32084   1
  -7   1   1 1732.40 3.92104  -2
  -6  -1  -1 1732.40 3.92104   1
   6   1   2-1.69242 0.29738   1
  -6   1  -3-0.07264 0.27714   1
  -9   1   4 2390.08 2.26664  -2
  -6  -1  -4 2390.08 2.26664   1
   6   1   5-0.01293 0.25285   1
  10   1  -5-0.35920 0.95693  -2
   6  -1   5-0.35920 0.95693   1
  -6  -1  -6 2.14346 0.26348   1
   6  -1   7 0.57155 0.24591   1
 -12  -1   8 3.51345 0.33218  -2
  -6   1  -8 3.51345 0.33218   1
   6   1   9 1.26094 0.59793   1
  13   1  -9 3006.65 2.96810  -2
   6  -1   9 3006.65 2.96810   1
  -6   1 -10-1.81055 0.35555   1
   6  -1  11 0.71996 0.34130   1
  15   1 -12 622.685 2.02675  -2
   6  -1  12 622.685 2.02675   1
 -16  -1  13 5.96958 0.65343  -2
  -6   1 -13 5.96958 0.65343   1
  -6  -1 -14 4.15664 0.63546   1
  -6   1 -15-7.40026 1.32128   1
 -18   1  16-0.08258 1.77492  -2
  -6  -1 -16-0.08258 1.77492   1
 -19   1  17 3109.97 8.56356  -2
  -6  -1 -17 3109.97 8.56356   1
  -6   1 -18 1.54526 1.38067   1
  -6   1 -19 8.94027 1.29542   1
 -21  -1  20 1860.21 8.54407  -2
  -6   1 -20 1860.21 8.54407   1
 -22  -1  21 3.71131 1.87295  -2
  -6   1 -21 3.71131 1.87295   1
   6  -2 -23 13970.3 19.4277   1
  -6  -2  22 100.420 1.32555   1
 -10   2  21 49800.0 34.8997  -2
   6  -2 -21 49800.0 34.8997   1
  -9  -2  20 12091.6 17.3014  -2
   6   2 -20 12091.6 17.3014   1
   6   2 -19 7311.67 10.3266   1
  -6  -2  18 11244.9 12.3404   1
   6   2 -17 45.8349 1.45787   1
  -7   2  17 66.4906 1.03167  -2
   6  -2 -17 66.4906 1.03167   1
  -6  -2  16 4145.42 5.51423  -2
   6   2 -16 4145.42 5.51423   1
  -6   2  15 8838.27 5.17238   1
   6  -2 -14 10439.9 5.35587   1
  -4   2  13 10334.3 5.20037  -2
   6  -2 -13 10334.3 5.20037   1
   3   2 -12 505.132 1.48840  -2
  -6  -2  12 505.132 1.48840   1
   6   2 -11 115277. 15.4964   1
   6  -2 -10 46853.6 9.36695   1
   6   2  -9 61378.5 9.56473   1
  -1   2   9 63830.0 20.5872  -2
   6  -2  -9 63830.0 20.5872   1
   0  -2  -8 7436.20 3.87428  -2
  -6   2   8 7436.20 3.87428   1
   6  -2  -7 2502.56 2.08327   1
  -6  -2   6 15.3698 14.7512   1
  -6   2   5 25172.3 6.41640   1
  -3   2  -4 1931.27 2.14321  -2
  -6  -2   4 1931.27 2.14321   1
   6  -2  -3 513146. 25.0672   1
   6   2  -2 18272.6 8.46249   1
   6   2  -1 300.169 0.57400   1
  -6   2   0 671268. 34.1422  -2
  -6  -2   0 671268. 34.1422   1
  -6  -2  -1 202.937 0.48512   1
   6   2   2 24689.4 6.80686   1
   6  -2   3 17689.5 5.64714   1
   9  -2  -4 1792.65 1.70140  -2
   6   2   4 1792.65 1.70140   1
   6  -2   5 27620.2 6.05449   1
 -10   2   5 32383.1 14.4865  -2
  -6  -2  -5 32383.1 14.4865   1
   6  -2   6 57313.3 9.72798   1
   6   2   7 26341.2 6.85322   1
  12   2  -8 123439. 20.2174  -2
   6  -2   8 123439. 20.2174   1
  -6  -2  -9 360.318 2.03507   1
 -13   2   9 393.784 1.21795  -2
  -6  -2  -9 393.784 1.21795   1
  -6  -2 -10 9670.39 5.15975   1
  -6   2 -11 342.678 1.25397   1
  15  -2 -12 1936.64 3.51002  -2
   6   2  12 1936.64 3.51002   1
 -16   2  13 3785.12 4.24496  -2
  -6  -2 -13 3785.12 4.24496   1
   6   2  14 407.253 1.81442   1
  -6   2 -15 25010.3 15.5587   1
 -18   2  16 1777.08 6.41762  -2
  -6  -2 -16 1777.08 6.41762   1
 -19  -2  17 9913.08 15.1637  -2
  -6   2 -17 9913.08 15.1637   1
  -6  -2 -18 28638.0 27.4074   1
  -6  -2 -19 4247.03 10.8695   1
 -21   2  20 22869.3 30.4970  -2
  -6  -2 -20 22869.3 30.4970   1
  -6  -3  23-2.91268 1.38914   1
  -6  -3  22 6.77771 1.04843   1
 -10  -3  21-2.21541 1.69919  -2
   6   3 -21-2.21541 1.69919   1
  -9  -3  20 2990.64 10.1845  -2
   6   3 -20 2990.64 10.1845   1
   6  -3 -19 5.50686 1.02554   1
  -8   3  19 0.47822 2.06076  -2
   6  -3 -19 0.47822 2.06076   1
   6   3 -18 7.57981 0.74892   1
  -7   3  17 914.621 2.70585  -2
   6  -3 -17 914.621 2.70585   1
  -6   3  16 4.94838 0.72392  -2
   6  -3 -16 4.94838 0.72392   1
   6  -3 -15-0.48351 0.50014   1
  -5   3  15 2881.41 8.96067  -2
   6  -3 -15 2881.41 8.96067   1
   6  -3 -14-2.81609 0.42136   1
   4  -3 -13 1.84607 0.54036  -2
  -6   3  13 1.84607 0.54036   1
   3  -3 -12 8245.08 5.62481  -2
  -6   3  12 8245.08 5.62481   1
   6   3 -11-1.05986 0.33670   1
   6  -3 -10 1.10624 0.32810   1
   6   3  -9-0.38609 0.41795   1
   1   3  -9 449.546 1.36132  -2
  -6  -3   9 449.546 1.36132   1
   0   3   8 2.67886 0.44653  -2
   6  -3  -8 2.67886 0.44653   1
   6  -3  -7 1.98532 0.28054   1
  -6  -3   6 0.05976 0.25381   1
  -6   3   5 0.85664 0.17291   1
   2  -3   5 0.32324 1.40768  -2
   6   3  -5 0.32324 1.40768   1
  -3   3  -4 2399.73 2.06503  -2
  -6  -3   4 2399.73 2.06503   1
   6  -3  -3-0.04026 0.10865   1
  -6  -3   2 1.49405 0.34886   1
  -6  -3   1 0.40170 0.18118   1
  -6   3   0 1.19225 0.16336  -2
  -6  -3   0 1.19225 0.16336   1
  -6   3  -1 1.04301 0.28706   1
  -7   3   1 6868.10 8.19808  -2
  -6  -3  -1 6868.10 8.19808   1
   6   3   2-0.30864 0.28226   1
  -6  -3  -3 1.23463 0.33565   1
   9  -3  -4 1168.29 1.98912  -2
   6   3   4 1168.29 1.98912   1
  -6  -3  -5-0.02661 0.37151   1
 -10   3   5-0.25313 1.04240  -2
  -6  -3  -5-0.25313 1.04240   1
  -6   3  -6-0.57181 0.36168   1
  -6   3  -7 2.34492 0.39407   1
  12   3  -8 1.36249 0.47493  -2
   6  -3   8 1.36249 0.47493   1
  -6  -3  -9 4.39557 0.77858   1
 -13  -3   9 1545.15 2.24848  -2
  -6   3  -9 1545.15 2.24848   1
  -6  -3 -10 2.16789 0.39114   1
   6   3  11 0.13728 0.49323   1
 -15  -3  12 1633.68 3.39955  -2
  -6   3 -12 1633.68 3.39955   1
 -16  -3  13 10.1544 0.68576  -2
  -6   3 -13 10.1544 0.68576   1
   6  -3  14 2.14856 0.82922   1
  -6   3 -15-2.18697 1.60403   1
  17  -3 -15 818.441 3.95906  -2
   6   3  15 818.441 3.95906   1
  18   3 -16 3.20636 1.01932  -2
   6  -3  16 3.20636 1.01932   1
 -19   3  17 1210.77 3.94396  -2
  -6  -3 -17 1210.77 3.94396   1
  -6   3 -18 0.08718 1.42506   1
  -6  -3 -19 4.20646 1.19381   1
 -21   3  20 3487.83 11.4988  -2
  -6  -3 -20 3487.83 11.4988   1
  -6  -4  23 728.676 4.46228   1
  -6  -4  22 138.491 1.97561   1
 -10  -4  21 2849.03 9.66154  -2
   6   4 -21 2849.03 9.66154   1
  -9  -4  20 2105.72 7.62924  -2
   6   4 -20 2105.72 7.62924   1
  -6  -4  19 712.899 3.34291   1
  -8   4  19 1584.44 8.06823  -2
   6  -4 -19 1584.44 8.06823   1
   6  -4 -18 16703.6 13.1661   1
  -7   4  17 1077.97 3.39395  -2
   6  -4 -17 1077.97 3.39395   1
  -6   4  16 61893.0 26.9799  -2
   6  -4 -16 61893.0 26.9799   1
   6   4 -15 2122.83 3.53309   1
  -5   4  15 2264.24 8.47658  -2
   6  -4 -15 2264.24 8.47658   1
  -6  -4  14 111.756 0.72855   1
  -4   4  13 12117.6 5.86960  -2
   6  -4 -13 12117.6 5.86960   1
  -3  -4  12 15908.9 8.50393  -2
   6   4 -12 15908.9 8.50393   1
   6   4 -11 3940.70 3.21870   1
   6  -4 -10 178.130 0.85764   1
   6  -4  -9 4478.36 4.74459   1
  -1   4   9 4399.79 3.43379  -2
   6  -4  -9 4399.79 3.43379   1
   0  -4  -8 90151.0 17.3925  -2
  -6   4   8 90151.0 17.3925   1
   6  -4  -7 603.875 1.07986   1
   6   4  -6 1476.07 1.50345   1
   6  -4  -5 141533. 36.6999   1
  -2   4  -5 292960. 33.5125  -2
  -6  -4   5 292960. 33.5125   1
  -3  -4  -4 3288.03 2.60758  -2
  -6   4   4 3288.03 2.60758   1
   6  -4  -3 6298.89 2.99637   1
   6   4  -2 11521.1 4.03072   1
  -6   4   1 270.352 0.69739   1
  -6   4   0 12641.1 4.30463  -2
  -6  -4   0 12641.1 4.30463   1
   6  -4   1 8691.97 3.00223   1
  -7   4   1 8636.49 10.1026  -2
  -6  -4  -1 8636.49 10.1026   1
  -6  -4  -2 177558. 17.0949   1
  -6  -4  -3 10208.8 4.29522   1
  -9   4   4 14323.4 5.68316  -2
  -6  -4  -4 14323.4 5.68316   1
  -6   4  -5 134229. 19.6895   1
 -10   4   5 162123. 29.1667  -2
  -6  -4  -5 162123. 29.1667   1
   6  -4   6 7283.45 3.91345   1
   6  -4   7 47.0319 0.65948   1
  12   4  -8 598.219 1.71223  -2
   6  -4   8 598.219 1.71223   1
  -6  -4  -9 6965.44 9.89467   1
 -13  -4   9 6814.55 4.73091  -2
  -6   4  -9 6814.55 4.73091   1
   6  -4  10 7597.58 5.30187   1
  -6   4 -11 3283.60 3.61135   1
 -15  -4  12 20837.1 12.2043  -2
  -6   4 -12 20837.1 12.2043   1
 -16  -4  13 73017.3 20.3585  -2
  -6   4 -13 73017.3 20.3585   1
  -6  -4 -14 1599.05 4.08169   1
  -6  -4 -15 5315.18 10.7936   1
  17   4 -15 5399.13 10.1665  -2
   6  -4  15 5399.13 10.1665   1
  18   4 -16 367.594 2.82327  -2
   6  -4  16 367.594 2.82327   1
  19  -4 -17 6493.23 8.96628  -2
   6   4  17 6493.23 8.96628   1
   6  -4  18 5109.20 8.09399   1
  -6   4 -19 1787.30 9.90204   1
  20   4 -19 1523.76 7.81921  -2
   6  -4  19 1523.76 7.81921   1
 -21  -4  20 27.4966 1.90107  -2
  -6   4 -20 27.4966 1.90107   1
  -6  -5  22-1.45133 1.35873   1
 -10  -5  21 25.4289 1.42450  -2
   6   5 -21 25.4289 1.42450   1
  -9  -5  20 7604.22 14.7232  -2
   6   5 -20 7604.22 14.7232   1
   6   5 -19-0.89467 1.49932   1
  -8   5  19-1.67069 2.56549  -2
   6  -5 -19-1.67069 2.56549   1
   6   5 -18 2.13106 1.10559   1
  -7  -5  17 1408.59 4.97275  -2
   6   5 -17 1408.59 4.97275   1
  -6  -5  16 4.71996 1.58705  -2
   6   5 -16 4.71996 1.58705   1
   6   5 -15 5.16415 0.65586   1
  -5   5  15 66.5801 2.88475  -2
   6  -5 -15 66.5801 2.88475   1
   6   5 -14 8.97539 0.63449   1
   4  -5 -13 1.83186 0.79245  -2
  -6   5  13 1.83186 0.79245   1
  -3   5  12 6094.79 6.28436  -2
   6  -5 -12 6094.79 6.28436   1
   6   5 -11-0.71856 0.55182   1
  -2   5  11 2.20437 2.11424  -2
   6  -5 -11 2.20437 2.11424   1
  -6   5  10 0.96398 0.55697   1
   6   5  -9 5.33664 0.96009   1
   1  -5  -9 2147.96 3.45028  -2
  -6   5   9 2147.96 3.45028   1
   0  -5   8 1.59783 0.45228  -2
   6   5  -8 1.59783 0.45228   1
   6   5  -7-0.16087 0.37162   1
  -6  -5   6-2.06718 0.32502   1
  -6  -5   5 1.10327 0.28877   1
  -3  -5  -4 119.939 0.60626  -2
  -6   5   4 119.939 0.60626   1
   6  -5  -3-0.03698 0.31251   1
   6   5  -2-0.70721 0.30255   1
   6  -5  -1 0.01227 0.30906   1
   5   5   1 946.138 2.58310  -2
   6  -5  -1 946.138 2.58310   1
  -6   5   0 1.77678 0.35746  -2
  -6  -5   0 1.77678 0.35746   1
   6  -5   1 1.82714 0.20263   1
  -7   5   1 378.908 2.70238  -2
  -6  -5  -1 378.908 2.70238   1
   6  -5   2 1.34077 0.27194   1
   6  -5   3 0.64981 0.33226   1
   9  -5  -4 2220.34 2.62055  -2
   6   5   4 2220.34 2.62055   1
   6  -5   5 1.00511 0.36604   1
 -10   5   5 0.25790 0.86493  -2
  -6  -5  -5 0.25790 0.86493   1
  -6  -5  -6 0.30177 0.33799   1
   6  -5   7 0.36575 0.34935   1
  12  -5  -8 3.98555 0.63163  -2
   6   5   8 3.98555 0.63163   1
   6   5   9 8.63447 0.83881   1
 -13  -5   9 3710.11 3.71562  -2
  -6   5  -9 3710.11 3.71562   1
  -6   5 -10 0.12594 0.50607   1
   6  -5  11 3.46783 0.52417   1
  15   5 -12 249.976 1.49486  -2
   6  -5  12 249.976 1.49486   1
 -16   5  13 2.83406 1.01291  -2
  -6  -5 -13 2.83406 1.01291   1
   6   5  14 8.12920 0.81051   1
  -6   5 -15 5.58289 1.18314   1
  17   5 -15 815.507 4.32090  -2
   6  -5  15 815.507 4.32090   1
 -18   5  16 1.33080 1.12752  -2
  -6  -5 -16 1.33080 1.12752   1
  19   5 -17 4544.78 9.17276  -2
   6  -5  17 4544.78 9.17276   1
   6  -5  18 7.75397 0.90485   1
  -6   5 -19 1.90110 1.42143   1
  20  -5 -19 17.3121 1.99464  -2
   6   5  19 17.3121 1.99464   1
   6   6 -22 280.964 2.81739   1
  11  -6 -22 340.169 4.48952  -2
  -6   6  22 340.169 4.48952   1
  10   6 -21 10003.3 15.4357  -2
  -6  -6  21 10003.3 15.4357   1
  -9  -6  20 4496.85 11.4061  -2
   6   6 -20 4496.85 11.4061   1
  -6  -6  19 6193.86 12.7858   1
  -8   6  19 7965.56 19.0347  -2
   6  -6 -19 7965.56 19.0347   1
  -6  -6  18 162.702 2.04237   1
  -7   6  17 563.915 3.46204  -2
   6  -6 -17 563.915 3.46204   1
   6   6 -16 9835.21 15.6557  -2
  -6  -6  16 9835.21 15.6557   1
   6   6 -15 5951.33 11.1813   1
  -5   6  15 5847.16 14.8841  -2
   6  -6 -15 5847.16 14.8841   1
   6   6 -14 6596.94 6.45091   1
  -4   6  13 12559.6 8.25949  -2
   6  -6 -13 12559.6 8.25949   1
   3   6 -12 566.329 2.40424  -2
  -6  -6  12 566.329 2.40424   1
  -6   6  11 31150.4 12.3651   1
   2   6 -11 35656.2 29.4946  -2
  -6  -6  11 35656.2 29.4946   1
   6   6 -10 4921.43 4.39498   1
   6   6  -9 45261.0 32.1918   1
   1  -6  -9 45243.1 14.3671  -2
  -6   6   9 45243.1 14.3671   1
   0   6   8 30109.9 13.3655  -2
   6  -6  -8 30109.9 13.3655   1
  -6   6   7 762.200 1.76469   1
   1   6   7 696.792 3.82111  -2
   6  -6  -7 696.792 3.82111   1
  -6   6   6 20510.9 6.98221   1
  -6   6   5 92892.4 16.6241   1
  -2   6  -5 101509. 28.2814  -2
  -6  -6   5 101509. 28.2814   1
  -3   6  -4 185.643 0.87097  -2
  -6  -6   4 185.643 0.87097   1
  -6  -6   3 131099. 14.2886   1
   6  -6  -2 20111.4 5.67863   1
   6   6  -1 1604.16 1.81355   1
   5   6   1 1612.40 3.74286  -2
   6  -6  -1 1612.40 3.74286   1
  -6   6   0 218086. 21.5521  -2
  -6  -6   0 218086. 21.5521   1
  -6  -6  -1 780.283 1.41752   1
   7   6  -1 782.616 3.67306  -2
   6  -6   1 782.616 3.67306   1
   6  -6   2 77200.2 14.2270   1
   6   6   3 26789.0 8.58181   1
   9   6  -4 8869.16 6.45536  -2
   6  -6   4 8869.16 6.45536   1
  -6   6  -5 49624.1 13.9904   1
 -10   6   5 57487.6 23.6757  -2
  -6  -6  -5 57487.6 23.6757   1
  -6  -6  -6 34605.8 9.80997   1
  -6   6  -7 1832.78 2.63742   1
  12  -6  -8 20769.8 12.0263  -2
   6   6   8 20769.8 12.0263   1
  -6  -6  -9 3182.12 9.66803   1
 -13  -6   9 3103.07 3.83292  -2
  -6   6  -9 3103.07 3.83292   1
  -6  -6 -10 12914.9 7.79036   1
  -6   6 -11 527.001 1.87157   1
  14   6 -11 1177.65 6.37220  -2
   6  -6  11 1177.65 6.37220   1
 -15   6  12 717.566 3.65290  -2
  -6  -6 -12 717.566 3.65290   1
 -16   6  13 12730.0 11.2345  -2
  -6  -6 -13 12730.0 11.2345   1
   6  -6  14 1567.86 4.22420   1
  -6  -6 -15 2461.52 10.9890   1
  17   6 -15 2575.60 7.49553  -2
   6  -6  15 2575.60 7.49553   1
 -18   6  16 3037.76 7.94049  -2
  -6  -6 -16 3037.76 7.94049   1
  19   6 -17 6013.11 10.2636  -2
   6  -6  17 6013.11 10.2636   1
  -6   6 -18 4205.83 8.39685   1
  20  -6 -18 4959.34 16.5244  -2
   6   6  18 4959.34 16.5244   1
  -6   6 -19 2377.26 7.95088   1
  20  -6 -19 2757.42 12.3989  -2
   6   6  19 2757.42 12.3989   1
  10  -7 -21 3.82244 2.13787  -2
  -6   7  21 3.82244 2.13787   1
  -9  -7  20 1891.70 13.2441  -2
   6   7 -20 1891.70 13.2441   1
   6   7 -19 1.45497 1.46651   1
  -8   7  19 10.9182 2.55713  -2
   6  -7 -19 10.9182 2.55713   1
  -6  -7  18-2.36859 1.15410   1
   7   7 -17 1075.84 4.60059  -2
  -6  -7  17 1075.84 4.60059   1
   6   7 -16-0.70835 1.71479  -2
  -6  -7  16-0.70835 1.71479   1
   6   7 -15-9.09049 1.55859   1
  -5   7  15 2508.19 10.3825  -2
   6  -7 -15 2508.19 10.3825   1
  -6  -7  14 3.77624 1.32145   1
   4   7 -13 1.90701 0.92192  -2
  -6  -7  13 1.90701 0.92192   1
  -3  -7  12 3822.62 6.22924  -2
   6   7 -12 3822.62 6.22924   1
   6   7 -11-3.11124 0.76767   1
  -2   7  11 11.9784 1.30104  -2
   6  -7 -11 11.9784 1.30104   1
  -6  -7  10 3.94850 0.53228   1
   6   7  -9 3.60418 1.23920   1
   1   7  -9 198.959 1.21694  -2
  -6  -7   9 198.959 1.21694   1
   0  -7  -8 2.52232 0.76536  -2
  -6   7   8 2.52232 0.76536   1
   6  -7  -7-0.37113 0.45481   1
   6  -7  -6 0.21962 0.41248   1
   6   7  -5-0.69670 0.70469   1
  -2   7  -5 5.14909 0.79698  -2
  -6  -7   5 5.14909 0.79698   1
  -3  -7  -4 377.203 1.39532  -2
  -6   7   4 377.203 1.39532   1
   6  -7  -3 2.42934 0.37044   1
   6   7  -2 1.54273 0.33209   1
   6  -7  -1-0.70432 0.35210   1
   5  -7   1 9.39657 0.90111  -2
   6   7  -1 9.39657 0.90111   1
   6   7   0 2.31572 0.41308  -2
   6  -7   0 2.31572 0.41308   1
   6  -7   1 1.75564 0.50771   1
   7   7  -1 1762.66 4.10581  -2
   6  -7   1 1762.66 4.10581   1
   6  -7   2-2.17191 0.38934   1
   6  -7   3-1.52596 0.41367   1
   9   7  -4 314.100 1.41330  -2
   6  -7   4 314.100 1.41330   1
  -6   7  -5 1.52254 0.75487   1
  10  -7  -5 3.09174 1.23746  -2
   6   7   5 3.09174 1.23746   1
  -6  -7  -6 1.16673 0.61842   1
  -6   7  -7 1.17087 0.67228   1
  11  -7  -7 56.5944 2.81247  -2
   6   7   7 56.5944 2.81247   1
  12   7  -8 3.34557 0.62223  -2
   6  -7   8 3.34557 0.62223   1
 -13  -7   9 340.886 1.43359  -2
  -6   7  -9 340.886 1.43359   1
  -6   7 -10 3.87957 0.54030   1
  -6   7 -11-4.77076 0.75507   1
  14   7 -11 15.0742 2.44668  -2
   6  -7  11 15.0742 2.44668   1
 -15   7  12 934.720 4.17160  -2
  -6  -7 -12 934.720 4.17160   1
 -16   7  13 10.9080 1.32259  -2
  -6  -7 -13 10.9080 1.32259   1
  -6  -7 -14-2.19182 0.91002   1
  -6   7 -15-1.94137 1.26692   1
  17  -7 -15 528.763 3.89808  -2
   6   7  15 528.763 3.89808   1
 -18  -7  16 9.43961 1.12284  -2
  -6   7 -16 9.43961 1.12284   1
  19  -7 -17 902.519 3.45405  -2
   6   7  17 902.519 3.45405   1
   6  -7  18 10.7416 0.98362   1
   9   8 -20 5852.69 16.7765  -2
  -6  -8  20 5852.69 16.7765   1
   6   8 -19 563.801 4.24067   1
   6   8 -18 300.357 3.09286   1
  -8   8  18 1315.94 8.48571  -2
   6  -8 -18 1315.94 8.48571   1
  -7  -8  17 164.146 4.11918  -2
   6   8 -17 164.146 4.11918   1
  -6   8  16 1825.95 7.44082  -2
   6  -8 -16 1825.95 7.44082   1
   6   8 -15 1281.37 8.35763   1
  -5   8  15 1218.60 5.31875  -2
   6  -8 -15 1218.60 5.31875   1
   6  -8 -14 117.513 1.84929   1
   4   8 -13 4445.58 7.79338  -2
  -6  -8  13 4445.58 7.79338   1
   3   8 -12 16857.7 16.6096  -2
  -6  -8  12 16857.7 16.6096   1
  -6  -8  11 30923.1 16.3216   1
   2   8 -11 37157.4 24.3861  -2
  -6  -8  11 37157.4 24.3861   1
   6   8 -10 10701.0 7.61873   1
   1  -8  -9 1550.07 2.82958  -2
  -6   8   9 1550.07 2.82958   1
   0   8   8 16495.6 10.7048  -2
   6  -8  -8 16495.6 10.7048   1
   6   8  -7 1310.59 2.70195   1
   1   8   7 1258.57 3.94170  -2
   6  -8  -7 1258.57 3.94170   1
   6  -8  -6 641.709 1.56616   1
   6   8  -5 39526.2 31.1476   1
  -2   8  -5 45773.1 12.5815  -2
  -6  -8   5 45773.1 12.5815   1
   3   8   4 2234.58 3.46645  -2
   6  -8  -4 2234.58 3.46645   1
   6  -8  -3 60422.5 13.3995   1
   6  -8  -2 2078.33 2.75162   1
  -6  -8   1 224.256 1.35220   1
   6  -8   0 89998.7 19.3564  -2
   6   8   0 89998.7 19.3564   1
  -6   8  -1 1143.15 2.92057   1
   7  -8  -1 1150.27 2.51142  -2
   6   8   1 1150.27 2.51142   1
   6   8   2 27033.3 9.38094   1
   6   8   3 134.521 0.79002   1
   9   8  -4 1122.95 2.84896  -2
   6  -8   4 1122.95 2.84896   1
   6  -8   5 39736.0 22.4100   1
  10  -8  -5 46976.4 17.5759  -2
   6   8   5 46976.4 17.5759   1
   6  -8   6 1955.59 3.17367   1
  -6  -8  -7 5024.10 8.52488   1
  11  -8  -7 5024.37 6.16743  -2
   6   8   7 5024.37 6.16743   1
 -12  -8   8 25885.4 17.4476  -2
  -6   8  -8 25885.4 17.4476   1
   6  -8   9 10128.2 18.6975   1
  13   8  -9 10885.9 11.2400  -2
   6  -8   9 10885.9 11.2400   1
   6   8  10 1806.98 4.96408   1
  -6  -8 -11 3470.13 11.5987   1
  14   8 -11 3577.67 8.59210  -2
   6  -8  11 3577.67 8.59210   1
  15   8 -12 14205.3 18.9623  -2
   6  -8  12 14205.3 18.9623   1
  16   8 -13 3025.73 6.87176  -2
   6  -8  13 3025.73 6.87176   1
   6  -8  14 133.959 1.77629   1
  -6  -8 -15 859.325 6.60138   1
  17   8 -15 822.415 4.72048  -2
   6  -8  15 822.415 4.72048   1
 -18   8  16 150.268 2.30358  -2
  -6  -8 -16 150.268 2.30358   1
  19   8 -17 7719.84 11.6531  -2
   6  -8  17 7719.84 11.6531   1
   6   9 -19 4.22343 2.21881   1
   6   9 -18 1.01692 1.40528   1
  -8   9  18-7.18289 2.74956  -2
   6  -9 -18-7.18289 2.74956   1
  -7  -9  17 613.370 3.84328  -2
   6   9 -17 613.370 3.84328   1
  -6   9  16 3.35707 1.59408  -2
   6  -9 -16 3.35707 1.59408   1
   6   9 -15-0.08617 2.49780   1
  -5   9  15 102.795 2.14202  -2
   6  -9 -15 102.795 2.14202   1
   6  -9 -14 2.79292 1.09348   1
  -4  -9  13 6.32368 1.54016  -2
   6   9 -13 6.32368 1.54016   1
  -3   9  12 5635.10 11.7506  -2
   6  -9 -12 5635.10 11.7506   1
  -6   9  11 3.23631 1.29782   1
   2   9 -11 1.89377 1.55836  -2
  -6  -9  11 1.89377 1.55836   1
   6  -9 -10-0.64011 0.63165   1
  -1   9   9 754.405 2.09047  -2
   6  -9  -9 754.405 2.09047   1
   0   9   8-0.42129 0.80009  -2
   6  -9  -8-0.42129 0.80009   1
   6  -9  -7-2.40362 0.84484   1
  -1   9  -7 2309.89 4.67006  -2
  -6  -9   7 2309.89 4.67006   1
  -6   9   6 0.76800 0.51490   1
   6   9  -5 4.84939 0.99520   1
   2   9   5-2.00113 0.72304  -2
   6  -9  -5-2.00113 0.72304   1
  -3   9  -4 1123.31 3.35360  -2
  -6  -9   4 1123.31 3.35360   1
  -6  -9   3-3.68235 0.62562   1
   4   9   3-2.00920 1.00842  -2
   6  -9  -3-2.00920 1.00842   1
  -6  -9   2 2.69768 0.47323   1
   6  -9  -1-2.19501 0.57365   1
  -5   9  -1 974.314 4.73745  -2
  -6  -9   1 974.314 4.73745   1
   6   9   0 4.64624 0.57552  -2
   6  -9   0 4.64624 0.57552   1
   6  -9   1 5.81367 0.63782   1
  -7   9   1 1456.22 4.04901  -2
  -6  -9  -1 1456.22 4.04901   1
  -6  -9  -2 3.00697 0.43855   1
   6   9   3-0.17143 0.64686   1
   8  -9  -3 2.04399 0.86242  -2
   6   9   3 2.04399 0.86242   1
   9  -9  -4 1166.74 3.63053  -2
   6   9   4 1166.74 3.63053   1
  -6  -9  -5 6.18669 1.71931   1
  10  -9  -5-3.79301 0.87203  -2
   6   9   5-3.79301 0.87203   1
   6  -9   6 3.32690 0.68436   1
  -6  -9  -7-10.5504 1.21676   1
  11   9  -7 244.491 2.32518  -2
   6  -9   7 244.491 2.32518   1
  12   9  -8-2.89143 1.74648  -2
   6  -9   8-2.89143 1.74648   1
  13   9  -9 3769.36 7.20678  -2
   6  -9   9 3769.36 7.20678   1
   6  -9  10 2.76883 1.11352   1
  -6  -9 -11 7.06468 2.00218   1
  14   9 -11 3.46881 1.85954  -2
   6  -9  11 3.46881 1.85954   1
  15  -9 -12 1050.88 5.49977  -2
   6   9  12 1050.88 5.49977   1
 -16   9  13-1.00155 1.44004  -2
  -6  -9 -13-1.00155 1.44004   1
   6  -9  14 3.62491 1.00990   1
  -6  -9 -15 13.7960 1.58782   1
  17   9 -15 534.664 4.01089  -2
   6  -9  15 534.664 4.01089   1
  18   9 -16-2.56776 1.50206  -2
   6  -9  16-2.56776 1.50206   1
   6  10 -18 3225.60 9.39885   1
  -7 -10  17 1041.76 6.27097  -2
   6  10 -17 1041.76 6.27097   1
  -6  10  16 47777.4 47.5641  -2
   6 -10 -16 47777.4 47.5641   1
   6  10 -15 2217.34 7.59687   1
  -5  10  15 2428.92 11.3657  -2
   6 -10 -15 2428.92 11.3657   1
  -6 -10  14 1784.43 5.50336   1
   4  10 -13 12660.0 14.3512  -2
  -6 -10  13 12660.0 14.3512   1
  -3 -10  12 1357.10 5.43949  -2
   6  10 -12 1357.10 5.43949   1
   6  10 -11 1277.86 7.82484   1
  -2  10  11 1382.05 5.26644  -2
   6 -10 -11 1382.05 5.26644   1
   6  10 -10 176.356 1.84817   1
  -1  10   9 13835.5 15.1552  -2
   6 -10  -9 13835.5 15.1552   1
   0  10  -8 45337.8 29.7857  -2
  -6 -10   8 45337.8 29.7857   1
  -6 -10   7 2402.60 9.37530   1
   1  10   7 2324.02 8.84649  -2
   6 -10  -7 2324.02 8.84649   1
   6 -10  -6 18068.4 14.2086   1
  -6 -10   5 124916. 64.3281   1
   2  10   5 150140. 46.9045  -2
   6 -10  -5 150140. 46.9045   1
   3 -10   4 50.7304 1.05066  -2
   6  10  -4 50.7304 1.05066   1
   6  10  -3 16141.2 15.8565   1
  -4  10  -3 20320.8 22.7465  -2
  -6 -10   3 20320.8 22.7465   1
   6  10  -2 10799.6 10.2122   1
  -6 -10   1 1563.85 4.95933   1
  -5  10  -1 1564.31 6.30065  -2
  -6 -10   1 1564.31 6.30065   1
  -6  10   0 29005.2 23.5348  -2
  -6 -10   0 29005.2 23.5348   1
   6 -10   1 1877.73 4.35883   1
  -6 -10  -2 101770. 31.9936   1
   6  10   3 25591.9 16.2114   1
   8 -10  -3 28735.0 29.7572  -2
   6  10   3 28735.0 29.7572   1
  -9  10   4 7642.90 9.46602  -2
  -6 -10  -4 7642.90 9.46602   1
  -6 -10  -5 55864.1 41.7111   1
  10  10  -5 60662.9 24.8555  -2
   6 -10   5 60662.9 24.8555   1
   6 -10   6 9941.97 10.9713   1
   6  10   7 408.153 3.03875   1
  11  10  -7 499.837 4.67128  -2
   6 -10   7 499.837 4.67128   1
  12  10  -8 316.926 3.00710  -2
   6 -10   8 316.926 3.00710   1
  -6 -10  -9 3624.64 11.9309   1
  13 -10  -9 3321.73 8.52189  -2
   6  10   9 3321.73 8.52189   1
   6 -10  10 12462.9 13.6354   1
  -6 -10 -11 185.972 3.40002   1
  14  10 -11 1199.44 5.45036  -2
   6 -10  11 1199.44 5.45036   1
 -15  10  12 439.371 3.67098  -2
  -6 -10 -12 439.371 3.67098   1
  16  10 -13 54189.8 29.6169  -2
   6 -10  13 54189.8 29.6169   1
  -6 -10 -14 2381.56 6.51645   1
  -6 -10 -15 942.837 6.62904   1
  17 -10 -15 983.397 8.10373  -2
   6  10  15 983.397 8.10373   1
  -7 -11  17 1905.14 7.71605  -2
   6  11 -17 1905.14 7.71605   1
   6  11 -16-0.44027 1.38558  -2
  -6 -11  16-0.44027 1.38558   1
   6  11 -15-7.61838 1.87611   1
  -5  11  15 246.030 2.73554  -2
   6 -11 -15 246.030 2.73554   1
   6  11 -14 1.59250 0.99220   1
  -4 -11  13 1.55765 1.89606  -2
   6  11 -13 1.55765 1.89606   1
  -3  11  12 799.545 6.11999  -2
   6 -11 -12 799.545 6.11999   1
   6  11 -11-1.88670 2.47114   1
  -2  11  11 0.13590 2.48120  -2
   6 -11 -11 0.13590 2.48120   1
   6  11 -10 5.76672 1.39996   1
  -1  11   9 411.137 4.68445  -2
   6 -11  -9 411.137 4.68445   1
   0  11  -8 10.2667 1.66850  -2
  -6 -11   8 10.2667 1.66850   1
  -6 -11   7 4.83221 2.23651   1
   1  11   7 533.709 4.61141  -2
   6 -11  -7 533.709 4.61141   1
  -6 -11   6 4.99687 1.09691   1
  -6 -11   5-3.34334 2.21789   1
   2  11   5 25.1852 1.75478  -2
   6 -11  -5 25.1852 1.75478   1
  -3  11  -4 204.903 4.65621  -2
  -6 -11   4 204.903 4.65621   1
  -6 -11   3-2.59378 1.90999   1
  -6 -11   2-3.97737 1.11663   1
   6  11  -1 7.06147 1.12314   1
  -6  11   0 3.60554 2.13665  -2
  -6 -11   0 3.60554 2.13665   1
  -6 -11  -1 0.73809 1.58262   1
  -6 -11  -2-2.02899 1.55608   1
  -6 -11  -3 7.36418 0.95194   1
   9  11  -4 132.699 2.27574  -2
   6 -11   4 132.699 2.27574   1
  -6 -11  -5 0.44044 1.50843   1
  10  11  -5-1.61983 1.29364  -2
   6 -11   5-1.61983 1.29364   1
  -6 -11  -6-6.83717 0.80981   1
  -6 -11  -7 9.12714 1.04619   1
  11 -11  -7 118.529 2.74168  -2
   6  11   7 118.529 2.74168   1
  12  11  -8 7.83010 1.03930  -2
   6 -11   8 7.83010 1.03930   1
  -6 -11  -9 0.79103 1.35840   1
  13  11  -9 38.7392 1.76800  -2
   6 -11   9 38.7392 1.76800   1
   6  11  10 4.61373 0.93138   1
  -6 -11 -11 0.79665 1.09262   1
  14 -11 -11 14.0531 2.30286  -2
   6  11  11 14.0531 2.30286   1
 -15  11  12 48.5637 1.44836  -2
  -6 -11 -12 48.5637 1.44836   1
  16 -11 -13 30.7460 1.45466  -2
   6  11  13 30.7460 1.45466   1
   6 -11  14-3.61751 1.07537   1
   6  12 -15 241.666 3.70875   1
  -5  12  15 244.042 2.63670  -2
   6 -12 -15 244.042 2.63670   1
   6  12 -14 118.868 1.70126   1
  -5  12  14 137.052 3.22685  -2
   6 -12 -14 137.052 3.22685   1
  -4 -12  13 2429.93 8.87821  -2
   6  12 -13 2429.93 8.87821   1
  -3 -12  12 9163.41 20.3110  -2
   6  12 -12 9163.41 20.3110   1
   6  12 -11 33125.8 40.6154   1
  -2  12  11 42633.1 44.3398  -2
   6 -12 -11 42633.1 44.3398   1
   6 -12 -10 10626.8 16.0621   1
  -1 -12   9 39.0459 1.82277  -2
   6  12  -9 39.0459 1.82277   1
   0  12   8 3204.07 15.7964  -2
   6 -12  -8 3204.07 15.7964   1
  -6 -12   7 1212.96 7.49554   1
   1  12   7 1098.58 6.53434  -2
   6 -12  -7 1098.58 6.53434   1
  -6 -12   6 465.418 4.81920   1
  -2  12  -5 2874.55 10.6108  -2
  -6 -12   5 2874.55 10.6108   1
  -3  12  -4 285.888 4.04085  -2
  -6 -12   4 285.888 4.04085   1
  -6 -12   3 66988.4 50.0745   1
  -6 -12   2 826.862 5.74856   1
  -6 -12   1 151.217 2.76868   1
  -6  12   0 109586. 61.5969  -2
  -6 -12   0 109586. 61.5969   1
  -6 -12  -1 29.7354 1.82247   1
  -6 -12  -2 2520.51 9.64504   1
  -6 -12  -3 123.309 2.54655   1
  -9  12   4 230.846 3.15793  -2
  -6 -12  -4 230.846 3.15793   1
  -6 -12  -5 8674.95 18.5117   1
  10  12  -5 10873.9 19.0774  -2
   6 -12   5 10873.9 19.0774   1
   6  12   6 35.0646 0.85777   1
  -6 -12  -7 4905.47 13.5571   1
  11 -12  -7 4748.07 15.5384  -2
   6  12   7 4748.07 15.5384   1
  12  12  -8 39865.7 32.3165  -2
   6 -12   8 39865.7 32.3165   1
  -6 -12  -9 6359.92 16.2623   1
  13 -12  -9 6405.90 18.4922  -2
   6  12   9 6405.90 18.4922   1
   6 -12  10 940.261 3.87473   1
  -6 -12 -11 1614.42 6.05199   1
  14 -12 -11 1798.97 10.1096  -2
   6  12  11 1798.97 10.1096   1
  15 -12 -12 6540.56 16.6741  -2
   6  12  12 6540.56 16.6741   1
  -4  13  13-15.7817 2.66116  -2
   6 -13 -13-15.7817 2.66116   1
  -3 -13  12 5284.41 15.6004  -2
   6  13 -12 5284.41 15.6004   1
   6  13 -11 27.7650 1.88799   1
   6  13 -10 15.2695 1.72863   1
  -2  13  10 17.3390 2.67700  -2
   6 -13 -10 17.3390 2.67700   1
  -1  13   9 141.610 2.18566  -2
   6 -13  -9 141.610 2.18566   1
   0 -13   8 7.41714 2.19862  -2
   6  13  -8 7.41714 2.19862   1
  -6 -13   7 10.7823 1.88102   1
  -6 -13   6 1.41801 1.62336   1
  -6 -13   5 5.04238 1.36486   1
  -3  13  -4 2060.52 12.7576  -2
  -6 -13   4 2060.52 12.7576   1
  -6 -13   3-11.3748 2.03774   1
  -6 -13   2 2.58594 1.93373   1
  -6 -13   1 6.54296 1.18396   1
  -6  13   0 0.98944 1.40695  -2
  -6 -13   0 0.98944 1.40695   1
  -6 -13  -1-0.38554 1.65087   1
  -6 -13  -2-13.8400 1.40941   1
  -6 -13  -3 18.6112 1.50807   1
  -9  13   4 572.883 6.24339  -2
  -6 -13  -4 572.883 6.24339   1
  -6 -13  -5 16.4448 1.55007   1
  -6 -13  -6 7.25472 1.59488   1
  -6 -13  -7 0.02304 1.41722   1
  12  13  -8 2.45930 1.62195  -2
   6 -13   8 2.45930 1.62195   1
  -6 -13  -9 78.0608 1.77508   1
  13 -13  -9 2664.25 8.13665  -2
   6  13   9 2664.25 8.13665   1
   6 -13  10 14.1626 1.43152   1
   6  14 -10-3.17465 2.04703   1
  -1 -14   9 1361.31 7.99017  -2
   6  14  -9 1361.31 7.99017   1
  -6 -14   6 8132.21 19.7468   1
  -3  14  -4 209.506 4.42527  -2
  -6 -14   4 209.506 4.42527   1
  -6 -14   3 4883.55 15.1268   1
  -6 -14   2 4539.91 14.4057   1
  -6 -14   1 698.648 5.82580   1
  -6  14   0 6786.22 22.3171  -2
  -6 -14   0 6786.22 22.3171   1
  -6 -14  -1 1869.77 8.86367   1
  -6 -14  -2 47210.4 44.7227   1
 -11   0  24 11.5029 2.93387  -2
   7   0 -24 11.5029 2.93387   1
   7   0 -22 8.82516 2.21005   1
  -9   0  21 7.73870 2.49694  -2
   7   0 -21 7.73870 2.49694   1
  -8   0  20 6514.08 15.0011  -2
   7   0 -20 6514.08 15.0011   1
   7   0 -19-2.52473 1.15891   1
  -7   0  18 7.92169 1.09825   1
  -6   0  17 415.069 2.11163  -2
   7   0 -17 415.069 2.11163   1
  -5   0  16 12.0932 0.93153  -2
   7   0 -16 12.0932 0.93153   1
  -7   0  15 2.66471 0.63703   1
   7   0 -14 1.83879 0.68942   1
  -3   0  13-0.41430 0.67156  -2
   7   0 -13-0.41430 0.67156   1
  -2   0  12 4088.74 5.58591  -2
   7   0 -12 4088.74 5.58591   1
   7   0 -11 0.39154 0.37110   1
   7   0 -10-0.89012 0.40098   1
   7   0  -9-0.58569 0.38794   1
   0   0   9 941.817 2.80950  -2
   7   0  -9 941.817 2.80950   1
   1   0   8 1.88781 0.44145  -2
   7   0  -8 1.88781 0.44145   1
  -7   0   7 4.13375 0.42314   1
   7   0  -6 0.57089 0.40269   1
  -7   0   5 0.52395 0.47571   1
   4   0   4 106.384 0.98042  -2
   7   0  -4 106.384 0.98042   1
   7   0  -3 1.03998 0.41786   1
   7   0  -2 1.42240 0.49506   1
   7   0  -1 5.20958 0.82492   1
  -6   0  -1 3304.13 3.50994  -2
  -7   0   1 3304.13 3.50994   1
   7   0   0 0.09979 0.58661  -2
   7   0   0 0.09979 0.58661   1
   7   0   1 6.05508 0.49991   1
   7   0   2 1.42770 0.44086   1
   7   0   3 0.53090 0.40986   1
  10   0  -4 35.7251 0.63560  -2
   7   0   4 35.7251 0.63560   1
  -7   0  -5-1.59884 0.42816   1
  11   0  -5-0.40734 1.24323  -2
   7   0   5-0.40734 1.24323   1
  -7   0  -6 0.12653 0.34399   1
   7   0   7 0.78448 0.35895   1
  13   0  -8 3.13220 0.50485  -2
   7   0   8 3.13220 0.50485   1
  -7   0  -9 2.07354 0.78875   1
  14   0  -9 3750.40 3.88169  -2
   7   0   9 3750.40 3.88169   1
  -7   0 -10 1.22270 0.45708   1
   7   0  11 1.38923 0.56165   1
  15   0 -11 9.20861 1.48931  -2
   7   0  11 9.20861 1.48931   1
  16   0 -12 921.111 3.59647  -2
   7   0  12 921.111 3.59647   1
 -17   0  13 6.39311 0.96576  -2
  -7   0 -13 6.39311 0.96576   1
  -7   0 -14 13.4034 1.14995   1
  -7   0 -15 15.1697 2.12786   1
 -19   0  16 24.3271 2.24973  -2
  -7   0 -16 24.3271 2.24973   1
 -20   0  17 450.935 4.96165  -2
  -7   0 -17 450.935 4.96165   1
  -7   0 -18-14.6870 1.72288   1
  -7   0 -19 7.05975 2.24870   1
 -22   0  20 39.2811 2.88790  -2
  -7   0 -20 39.2811 2.88790   1
 -11  -1  24 585.617 6.77631  -2
   7   1 -24 585.617 6.77631   1
   7   1 -23 254.693 2.64918   1
   7   1 -22 11514.4 13.7578   1
  -9   1  21 1629.40 5.29085  -2
   7  -1 -21 1629.40 5.29085   1
  -8  -1  20 11251.9 16.2453  -2
   7   1 -20 11251.9 16.2453   1
  -7  -1  19 48.0616 1.21306   1
  -7  -1  18 282.307 1.80061   1
   6  -1 -17 6994.71 5.87489  -2
  -7   1  17 6994.71 5.87489   1
  -5   1  16 6094.01 6.66541  -2
   7  -1 -16 6094.01 6.66541   1
  -7  -1  15 5048.28 4.19026   1
  -7   1  14 13089.0 6.47419   1
   3   1 -13 4439.24 3.44411  -2
  -7  -1  13 4439.24 3.44411   1
  -2   1  12 7224.57 5.21952  -2
   7  -1 -12 7224.57 5.21952   1
   7  -1 -11 13952.8 4.92480   1
   7   1 -10 238.471 0.73133   1
  -7   1   9 46493.5 8.89592   1
   0   1   9 46773.2 13.3196  -2
   7  -1  -9 46773.2 13.3196   1
   1   1   8 1849.93 2.11003  -2
   7  -1  -8 1849.93 2.11003   1
  -7  -1   7 17064.8 4.59086   1
  -7   1   6 1234.44 1.28754   1
   7  -1  -5 167.608 0.65628   1
  -4   1  -4 18314.0 7.06495  -2
  -7  -1   4 18314.0 7.06495   1
  -7  -1   3 38174.7 7.58999   1
   7   1  -2 13759.6 4.41294   1
  -7  -1   1 8840.31 3.55025   1
   7  -1   0 102430. 13.7930  -2
   7   1   0 102430. 13.7930   1
   7   1   1 96.3441 0.71195   1
  -8   1   1 90.4251 1.40066  -2
  -7  -1  -1 90.4251 1.40066   1
   7   1   2 3030.35 2.10254   1
   7   1   3 3196.36 1.88882   1
 -10  -1   4 3400.60 2.57425  -2
  -7   1  -4 3400.60 2.57425   1
  -7  -1  -5 24668.2 6.08326   1
 -11   1   5 30492.0 14.7964  -2
  -7  -1  -5 30492.0 14.7964   1
   7  -1   6 21692.3 5.62224   1
   7   1   7 22025.3 5.43985   1
 -13  -1   8 1483.33 2.15675  -2
  -7   1  -8 1483.33 2.15675   1
   7  -1   9 2713.46 4.85027   1
 -14  -1   9 2812.85 2.85337  -2
  -7   1  -9 2812.85 2.85337   1
  -7   1 -10 22994.4 7.61859   1
   7  -1  11 19958.5 7.96206   1
  16  -1 -12 12069.4 8.76650  -2
   7   1  12 12069.4 8.76650   1
  17   1 -13 938.576 2.17259  -2
   7  -1  13 938.576 2.17259   1
  -7   1 -14 470.268 2.20493   1
  -7   1 -15 2482.08 7.51336   1
 -19   1  16 5480.45 14.0363  -2
  -7  -1 -16 5480.45 14.0363   1
 -20  -1  17 6123.04 12.1923  -2
  -7   1 -17 6123.04 12.1923   1
  -7   1 -18 4426.09 10.8472   1
  -7   1 -19 1932.60 7.26639   1
 -22   1  20 2544.31 10.0038  -2
  -7  -1 -20 2544.31 10.0038   1
  -7  -2  23 8.12236 1.11623   1
   7   2 -22 9.78848 1.07822   1
  -9   2  21 25.6431 1.63558  -2
   7  -2 -21 25.6431 1.63558   1
  -8  -2  20 1118.16 5.22119  -2
   7   2 -20 1118.16 5.22119   1
   7   2 -19-1.90372 0.98378   1
   7   2 -18 3.09270 1.06888   1
  -6   2  17 13.5235 0.76941  -2
   7  -2 -17 13.5235 0.76941   1
   5  -2 -16-1.14445 0.61704  -2
  -7   2  16-1.14445 0.61704   1
  -7   2  15 2.53345 0.47504   1
   7   2 -14 1.53911 0.36489   1
   7  -2 -13 0.66394 1.51134   1
  -3  -2  13 4.17741 0.55389  -2
   7   2 -13 4.17741 0.55389   1
   2  -2 -12 91.4169 0.77542  -2
  -7   2  12 91.4169 0.77542   1
   7   2 -11 2.12018 0.35640   1
   7   2 -10 0.67462 0.33788   1
  -7   2   9 1.78314 0.28664   1
   0   2   9 11952.2 6.62950  -2
   7  -2  -9 11952.2 6.62950   1
  -1  -2  -8 3.97068 0.29486  -2
  -7   2   8 3.97068 0.29486   1
  -7  -2   7-0.18044 0.23518   1
   7   2  -6 0.37620 0.22762   1
   7   2  -5 0.22175 0.22909   1
  -4   2  -4 29.3839 0.46169  -2
  -7  -2   4 29.3839 0.46169   1
  -7   2   3 1.58957 0.30289   1
  -7  -2   2 0.17802 0.23883   1
   7  -2  -1 0.60756 0.27492   1
  -7   2   0 1.21152 0.38082  -2
  -7  -2   0 1.21152 0.38082   1
   7  -2   1 0.54415 0.25019   1
  -8   2   1 66.4469 0.57799  -2
  -7  -2  -1 66.4469 0.57799   1
   7   2   2 0.46557 0.20309   1
  -7  -2  -3 0.36203 0.31026   1
  10   2  -4 1338.78 1.63789  -2
   7  -2   4 1338.78 1.63789   1
   7   2   5 0.13035 0.24541   1
 -11   2   5 0.42169 0.60643  -2
  -7  -2  -5 0.42169 0.60643   1
   7  -2   6 0.18578 0.32871   1
  -7   2  -7-0.87641 0.34214   1
  13  -2  -8 1.27458 0.46537  -2
   7   2   8 1.27458 0.46537   1
   7   2   9-1.74995 0.73039   1
 -14  -2   9 2351.32 2.55270  -2
  -7   2  -9 2351.32 2.55270   1
   7   2  10 3.50214 0.41341   1
  -7   2 -11-0.32859 0.45008   1
  16   2 -12 1030.84 2.94108  -2
   7  -2  12 1030.84 2.94108   1
 -17  -2  13 3.91900 0.71796  -2
  -7   2 -13 3.91900 0.71796   1
   7   2  14 8.11948 0.78850   1
   7  -2  15 2.55536 1.01886   1
  18  -2 -15 39.8223 2.19974  -2
   7   2  15 39.8223 2.19974   1
 -19   2  16 3.57708 1.52598  -2
  -7  -2 -16 3.57708 1.52598   1
 -20  -2  17 788.790 4.53922  -2
  -7   2 -17 788.790 4.53922   1
  -7   2 -18-7.46057 1.38883   1
  -7   2 -19 2.38365 1.29756   1
 -22  -2  20 972.229 5.96545  -2
  -7   2 -20 972.229 5.96545   1
   7   3 -23 818.241 4.72869   1
   7   3 -22 9551.34 15.8857   1
   9   3 -21 3454.99 7.59631  -2
  -7  -3  21 3454.99 7.59631   1
  -8   3  20 3612.75 9.57024  -2
   7  -3 -20 3612.75 9.57024   1
  -7  -3  19 9106.44 11.5660   1
  -7   3  19 10196.7 19.2353  -2
   7  -3 -19 10196.7 19.2353   1
   7  -3 -18 287.578 1.85914   1
  -6  -3  17 4775.30 6.63590  -2
   7   3 -17 4775.30 6.63590   1
  -5   3  16 3485.19 5.12659  -2
   7  -3 -16 3485.19 5.12659   1
  -7   3  15 34420.9 11.8971   1
   7  -3 -14 108.090 0.71447   1
  -7   3  13 9487.90 14.8011   1
  -3   3  13 11304.9 5.52857  -2
   7  -3 -13 11304.9 5.52857   1
  -2  -3  12 21449.1 9.44194  -2
   7   3 -12 21449.1 9.44194   1
   7  -3 -11 41514.0 9.55932   1
  -7   3  10 19609.3 6.22553   1
   7  -3  -9 72091.5 18.4872   1
   0  -3  -9 72416.8 13.6604  -2
  -7   3   9 72416.8 13.6604   1
  -1   3  -8 92332.7 17.3034  -2
  -7  -3   8 92332.7 17.3034   1
   7   3  -7 591.361 1.03667   1
  -7  -3   6 7500.67 2.79378   1
  -7  -3   5 915.380 1.02024   1
   3  -3   5 1130.34 4.14007  -2
   7   3  -5 1130.34 4.14007   1
   4   3   4 17277.1 5.65898  -2
   7  -3  -4 17277.1 5.65898   1
   7   3  -3 1440.74 1.42577   1
   7  -3  -2 8587.45 2.76840   1
  -7  -3   1 28760.7 5.88742   1
  -6   3  -1 30644.8 17.0684  -2
  -7  -3   1 30644.8 17.0684   1
   7  -3   0 15288.2 4.71998  -2
   7   3   0 15288.2 4.71998   1
   7   3   1 9695.98 4.35239   1
  -8   3   1 9905.37 7.38588  -2
  -7  -3  -1 9905.37 7.38588   1
   7   3   2 567.901 1.03222   1
   7  -3   3 3378.33 2.52007   1
  10   3  -4 13033.5 5.90827  -2
   7  -3   4 13033.5 5.90827   1
   7   3   5 145267. 20.2337   1
  11   3  -5 185465. 26.7424  -2
   7  -3   5 185465. 26.7424   1
   7   3   6 62.6618 0.52821   1
  -7  -3  -7 8894.20 4.26374   1
 -13   3   8 22601.6 9.07277  -2
  -7  -3  -8 22601.6 9.07277   1
   7   3   9 49.4005 0.99020   1
 -14   3   9 23.2792 0.72779  -2
  -7  -3  -9 23.2792 0.72779   1
  -7  -3 -10 4945.84 3.89927   1
  -7   3 -11 36425.6 12.4853   1
  15  -3 -11 40191.5 35.2981  -2
   7   3  11 40191.5 35.2981   1
  16   3 -12 30375.8 14.4849  -2
   7  -3  12 30375.8 14.4849   1
  17  -3 -13 207.364 1.33797  -2
   7   3  13 207.364 1.33797   1
   7  -3  14 1910.63 4.40436   1
   7  -3  15 17048.8 13.3506   1
  19  -3 -16 10913.1 14.0168  -2
   7   3  16 10913.1 14.0168   1
  20  -3 -17 105.764 1.66734  -2
   7   3  17 105.764 1.66734   1
  -7  -3 -18 1453.81 6.28100   1
  -7   3 -19 2991.11 9.09423   1
 -22   3  20 2423.70 9.67687  -2
  -7  -3 -20 2423.70 9.67687   1
   7   4 -23 17.8586 1.34122   1
  -7  -4  22-10.4076 1.37137   1
   9   4 -21-1.65776 2.24111  -2
  -7  -4  21-1.65776 2.24111   1
  -8  -4  20 3547.01 9.84361  -2
   7   4 -20 3547.01 9.84361   1
   7   4 -19-4.44009 1.67077   1
  -7   4  19 15.9986 2.36948  -2
   7  -4 -19 15.9986 2.36948   1
   7   4 -18 1.84206 1.11158   1
  -6  -4  17 243.421 2.35182  -2
   7   4 -17 243.421 2.35182   1
   5   4 -16 6.85659 1.08187  -2
  -7  -4  16 6.85659 1.08187   1
   7   4 -15 3.25293 0.52264   1
  -4   4  15 290.101 3.61385  -2
   7  -4 -15 290.101 3.61385   1
   7  -4 -14-2.63257 0.45462   1
  -3   4  13 1.42448 0.65879  -2
   7  -4 -13 1.42448 0.65879   1
  -2  -4  12 3615.42 4.60095  -2
   7   4 -12 3615.42 4.60095   1
   7   4 -11 2.95940 0.38286   1
  -7  -4  10 2.48742 0.35169   1
   7  -4  -9 1.52371 0.54366   1
   0   4  -9 923.768 2.05598  -2
  -7  -4   9 923.768 2.05598   1
   1   4   8 1.84328 0.45581  -2
   7  -4  -8 1.84328 0.45581   1
  -7   4   7 0.53260 0.26937   1
   7  -4  -6-0.40910 0.25391   1
  -7  -4   5 0.49355 0.16022   1
  -3   4  -5 2.50791 1.36805  -2
  -7  -4   5 2.50791 1.36805   1
  -4  -4  -4 597.842 1.17403  -2
  -7   4   4 597.842 1.17403   1
   7  -4  -3 1.24715 0.32107   1
  -5   4  -3 36.0172 1.31317  -2
  -7  -4   3 36.0172 1.31317   1
  -7   4   2 2.26142 0.31241   1
  -7   4   1 0.80120 0.28790   1
   6   4   1 1796.79 4.69502  -2
   7  -4  -1 1796.79 4.69502   1
  -7   4   0-0.32905 0.22660  -2
  -7  -4   0-0.32905 0.22660   1
  -7   4  -1 0.52744 0.26283   1
  -8   4   1 2135.96 5.38177  -2
  -7  -4  -1 2135.96 5.38177   1
  -7   4  -2-0.05314 0.29070   1
   7  -4   3-0.20759 0.31037   1
  10   4  -4 73.1373 0.60257  -2
   7  -4   4 73.1373 0.60257   1
   7  -4   5-3.43811 0.43241   1
  11   4  -5 9.50274 0.63026  -2
   7  -4   5 9.50274 0.63026   1
   7  -4   6 1.02109 0.37631   1
   7   4   7-1.95661 0.38127   1
  13   4  -8 3.08753 0.47653  -2
   7  -4   8 3.08753 0.47653   1
  -7  -4  -9 1.42838 1.33368   1
 -14   4   9 1094.79 1.90330  -2
  -7  -4  -9 1094.79 1.90330   1
  -7   4 -10 3.77341 0.49650   1
   7  -4  11-1.72176 0.50783   1
 -16  -4  12 607.543 2.35687  -2
  -7   4 -12 607.543 2.35687   1
  17   4 -13 11.0367 1.06956  -2
   7  -4  13 11.0367 1.06956   1
  -7  -4 -14 2.68207 0.88282   1
   7   4  15-0.08581 0.86999   1
 -19   4  16 8.58854 1.09054  -2
  -7  -4 -16 8.58854 1.09054   1
  20  -4 -17 181.756 1.74945  -2
   7   4  17 181.756 1.74945   1
  -7   4 -18 5.31717 0.96094   1
  -7  -4 -19 4.76017 1.31439   1
   7   5 -22 13467.4 19.4686   1
   9   5 -21 4125.17 16.4967  -2
  -7  -5  21 4125.17 16.4967   1
   8   5 -20 16681.8 21.9809  -2
  -7  -5  20 16681.8 21.9809   1
   7   5 -19 3804.45 9.77905   1
  -7   5  19 4953.75 14.6368  -2
   7  -5 -19 4953.75 14.6368   1
   7   5 -18 1282.66 4.62461   1
   6   5 -17 6985.19 10.8994  -2
  -7  -5  17 6985.19 10.8994   1
  -5  -5  16 6435.75 12.4512  -2
   7   5 -16 6435.75 12.4512   1
   7  -5 -15 369.631 1.64568   1
  -7  -5  14 28407.1 12.8418   1
  -3  -5  13 30432.0 11.4184  -2
   7   5 -13 30432.0 11.4184   1
  -2   5  12 1116.64 2.97221  -2
   7  -5 -12 1116.64 2.97221   1
   7  -5 -11 1752.65 2.69660   1
   7   5 -10 13505.2 7.06638   1
  -7   5   9 13567.0 11.6059   1
   0  -5  -9 13926.1 7.00275  -2
  -7   5   9 13926.1 7.00275   1
   1   5   8 29061.4 11.4621  -2
   7  -5  -8 29061.4 11.4621   1
   7   5  -7 29758.0 8.48245   1
  -7   5   6 6914.28 3.95713   1
   7  -5  -5 873.811 1.72633   1
   3   5   5 4749.25 8.14512  -2
   7  -5  -5 4749.25 8.14512   1
   4   5   4 14790.0 5.80365  -2
   7  -5  -4 14790.0 5.80365   1
  -7  -5   3 83461.0 11.2400   1
   7  -5  -2 12109.0 4.30578   1
   7   5  -1 1545.89 1.86544   1
  -6   5  -1 1547.24 2.67097  -2
  -7  -5   1 1547.24 2.67097   1
   7  -5   0 156204. 17.8598  -2
   7   5   0 156204. 17.8598   1
  -7   5  -1 4256.44 3.16219   1
  -8   5   1 3116.15 6.91926  -2
  -7  -5  -1 3116.15 6.91926   1
   7   5   2 7805.98 3.67047   1
   7  -5   3 12057.9 4.75781   1
  10   5  -4 373.686 1.20212  -2
   7  -5   4 373.686 1.20212   1
   7  -5   5 7286.42 5.37505   1
  11   5  -5 7835.09 6.97048  -2
   7  -5   5 7835.09 6.97048   1
   7   5   6 42697.4 10.7897   1
   7  -5   7 21668.4 7.56279   1
  13   5  -8 5576.35 5.73841  -2
   7  -5   8 5576.35 5.73841   1
 -14   5   9 6547.34 4.72376  -2
  -7  -5  -9 6547.34 4.72376   1
   7   5  10 77141.8 17.4909   1
   7   5  11 5662.00 4.98550   1
 -16   5  12 2647.00 5.29329  -2
  -7  -5 -12 2647.00 5.29329   1
  17   5 -13 3886.06 6.08466  -2
   7  -5  13 3886.06 6.08466   1
   7   5  14 104.984 1.37654   1
  -7  -5 -15 38.0546 1.31951   1
  18  -5 -15 58.3986 1.89291  -2
   7   5  15 58.3986 1.89291   1
  19   5 -16 4054.56 9.01959  -2
   7  -5  16 4054.56 9.01959   1
  20   5 -17 13640.0 13.0880  -2
   7  -5  17 13640.0 13.0880   1
   7   5  18 7459.02 9.98871   1
  -7  -5 -19 1485.37 9.08390   1
  21  -5 -19 1485.70 9.03564  -2
   7   5  19 1485.70 9.03564   1
   7   6 -22 3.27696 1.52990   1
  10  -6 -22 100.745 3.09002  -2
  -7   6  22 100.745 3.09002   1
  -9  -6  21-20.1911 2.81920  -2
   7   6 -21-20.1911 2.81920   1
   8   6 -20 2571.99 8.96671  -2
  -7  -6  20 2571.99 8.96671   1
   7   6 -19 8.72154 2.13408   1
  -7   6  19 8.29652 1.59987  -2
   7  -6 -19 8.29652 1.59987   1
   7   6 -18 6.54238 1.13264   1
  -6  -6  17 99.5722 2.16020  -2
   7   6 -17 99.5722 2.16020   1
  -5  -6  16 5.96064 1.67408  -2
   7   6 -16 5.96064 1.67408   1
   7  -6 -15 2.68777 1.31269   1
  -7   6  14 0.53830 0.63118   1
  -3  -6  13 4.41916 0.80696  -2
   7   6 -13 4.41916 0.80696   1
  -2  -6  12 215.294 1.47858  -2
   7   6 -12 215.294 1.47858   1
  -7   6  11-4.14850 0.75678   1
  -1   6  11-2.27657 1.52375  -2
   7  -6 -11-2.27657 1.52375   1
   7   6 -10 0.99077 0.54701   1
   7   6  -9 10.3667 1.80586   1
   0   6   9 7318.43 5.31396  -2
   7  -6  -9 7318.43 5.31396   1
  -1  -6  -8 2.94775 0.63263  -2
  -7   6   8 2.94775 0.63263   1
  -7   6   7 9.31693 0.45801   1
  -7   6   6 0.23107 0.35905   1
   7   6  -5 1.36563 0.39061   1
  -3   6  -5 0.38184 0.94780  -2
  -7  -6   5 0.38184 0.94780   1
   4  -6   4 516.058 1.47781  -2
   7   6  -4 516.058 1.47781   1
  -7   6   3 3.49838 0.36680   1
  -5   6  -3 3.60173 0.67882  -2
  -7  -6   3 3.60173 0.67882   1
   7  -6  -2-1.64884 0.30711   1
   7  -6  -1 2.03012 0.36339   1
   6  -6   1 176.093 1.26873  -2
   7   6  -1 176.093 1.26873   1
  -7   6   0 2.45410 0.41518  -2
  -7  -6   0 2.45410 0.41518   1
   7   6   1-0.01262 0.45242   1
   8   6  -1 144.315 1.34974  -2
   7  -6   1 144.315 1.34974   1
  -7  -6  -2-0.49791 0.35800   1
   7  -6   3-0.45044 0.43251   1
 -10   6   4 1791.58 3.03193  -2
  -7  -6  -4 1791.58 3.03193   1
   7   6   5 1.63443 0.69208   1
  11   6  -5-1.39151 0.89719  -2
   7  -6   5-1.39151 0.89719   1
   7  -6   6-0.98693 0.49217   1
  -7   6  -7-4.94931 0.54717   1
  13   6  -8 8.88328 0.64487  -2
   7  -6   8 8.88328 0.64487   1
  14   6  -9 27.9106 0.78842  -2
   7  -6   9 27.9106 0.78842   1
  -7   6 -10 1.29810 0.53975   1
  -7  -6 -11 0.61646 0.69710   1
  15   6 -11 18.0174 2.70559  -2
   7  -6  11 18.0174 2.70559   1
  16   6 -12 505.980 3.08899  -2
   7  -6  12 505.980 3.08899   1
 -17   6  13 4.34324 1.21094  -2
  -7  -6 -13 4.34324 1.21094   1
  -7   6 -14 4.27107 0.89580   1
  -7   6 -15-0.89436 1.51963   1
  18  -6 -15 161.997 3.75296  -2
   7   6  15 161.997 3.75296   1
  19   6 -16 5.40886 1.48180  -2
   7  -6  16 5.40886 1.48180   1
 -20   6  17 1150.43 3.90169  -2
  -7  -6 -17 1150.43 3.90169   1
  -7  -6 -18 9.04217 0.97081   1
  -9  -7  21 4371.93 12.7364  -2
   7   7 -21 4371.93 12.7364   1
  -8   7  20 1643.69 7.22696  -2
   7  -7 -20 1643.69 7.22696   1
   7   7 -19 9004.20 15.6425   1
  -7   7  19 12708.6 25.1440  -2
   7  -7 -19 12708.6 25.1440   1
   7   7 -18 575.909 3.41835   1
  -6  -7  17 5237.61 10.1034  -2
   7   7 -17 5237.61 10.1034   1
  -5  -7  16 1338.86 6.19237  -2
   7   7 -16 1338.86 6.19237   1
  -7  -7  15 35113.7 27.5062   1
  -4   7  15 34901.8 37.5747  -2
   7  -7 -15 34901.8 37.5747   1
   7   7 -14 151.981 1.93708   1
  -3  -7  13 17911.7 10.4124  -2
   7   7 -13 17911.7 10.4124   1
  -2  -7  12 15474.5 11.7053  -2
   7   7 -12 15474.5 11.7053   1
   7  -7 -11 29703.6 18.1298   1
   1   7 -11 34740.6 18.3596  -2
  -7  -7  11 34740.6 18.3596   1
  -7   7  10 21805.7 10.4308   1
   7   7  -9 61078.3 40.2238   1
   0   7   9 60688.8 15.9968  -2
   7  -7  -9 60688.8 15.9968   1
  -1   7  -8 99263.4 23.9685  -2
  -7  -7   8 99263.4 23.9685   1
   7  -7  -7 210.737 1.43958   1
   2   7   7 222.112 1.78561  -2
   7  -7  -7 222.112 1.78561   1
  -7   7   6 3063.30 3.16596   1
   7   7  -5 443.979 1.66335   1
   3   7   5 578.063 1.98486  -2
   7  -7  -5 578.063 1.98486   1
   4   7   4 3651.41 4.33767  -2
   7  -7  -4 3651.41 4.33767   1
   7  -7  -3 5220.07 3.79991   1
   7  -7  -2 1741.68 2.18750   1
   7  -7  -1 9162.52 5.01758   1
   6   7   1 9320.25 12.5439  -2
   7  -7  -1 9320.25 12.5439   1
   7  -7   0 92.0029 1.29300  -2
   7   7   0 92.0029 1.29300   1
   7  -7   1 5056.75 4.18276   1
   8  -7  -1 4946.52 10.5137  -2
   7   7   1 4946.52 10.5137   1
  -7  -7  -2 711.316 1.55772   1
  -7  -7  -3 3587.38 3.50283   1
  10  -7  -4 5237.22 5.41279  -2
   7   7   4 5237.22 5.41279   1
  -7   7  -5 152316. 62.4138   1
  11   7  -5 174623. 29.1998  -2
   7  -7   5 174623. 29.1998   1
   7   7   6 791.674 2.05704   1
   7  -7   7 4462.08 5.27649   1
  12   7  -7 4222.22 10.6741  -2
   7  -7   7 4222.22 10.6741   1
  13   7  -8 23873.7 15.2871  -2
   7  -7   8 23873.7 15.2871   1
 -14  -7   9 272.984 1.61825  -2
  -7   7  -9 272.984 1.61825   1
   7  -7  10 12538.9 10.9685   1
   7   7  11 31789.7 26.2959   1
  15   7 -11 31233.7 32.3263  -2
   7  -7  11 31233.7 32.3263   1
 -16   7  12 21071.8 22.8420  -2
  -7  -7 -12 21071.8 22.8420   1
 -17   7  13 457.419 3.61428  -2
  -7  -7 -13 457.419 3.61428   1
  -7  -7 -14 3763.34 7.90767   1
  18   7 -15 16899.2 20.7804  -2
   7  -7  15 16899.2 20.7804   1
  19  -7 -16 10240.6 17.4152  -2
   7   7  16 10240.6 17.4152   1
  20   7 -17 32.2516 1.69121  -2
   7  -7  17 32.2516 1.69121   1
  -7  -7 -18 597.959 3.33320   1
  -8  -8  20 727.570 5.83567  -2
   7   8 -20 727.570 5.83567   1
   7   8 -19 21.5987 1.79025  -2
  -7  -8  19 21.5987 1.79025   1
  -7  -8  18-4.85463 1.21133   1
  -6  -8  17 24.1061 1.78748  -2
   7   8 -17 24.1061 1.78748   1
  -5  -8  16 4.47687 1.60988  -2
   7   8 -16 4.47687 1.60988   1
   7   8 -15 8.61495 2.98147   1
  -4   8  15 3211.24 8.48339  -2
   7  -8 -15 3211.24 8.48339   1
   7   8 -14-2.18746 1.30842   1
  -3  -8  13 2.78136 1.62642  -2
   7   8 -13 2.78136 1.62642   1
   2   8 -12 2068.20 6.98273  -2
  -7  -8  12 2068.20 6.98273   1
   7  -8 -11-3.18128 0.71314   1
   1   8 -11 21.8226 1.30909  -2
  -7  -8  11 21.8226 1.30909   1
  -7  -8  10-1.14001 0.56137   1
   7   8  -9-9.17679 1.01098   1
   0   8   9 360.974 1.48057  -2
   7  -8  -9 360.974 1.48057   1
  -1  -8  -8 2.94161 0.75151  -2
  -7   8   8 2.94161 0.75151   1
   7   8  -7-2.00000 0.59853   1
   2   8   7 5401.34 8.25047  -2
   7  -8  -7 5401.34 8.25047   1
  -7   8   6-1.58109 0.40437   1
  -7  -8   5 2.68100 0.92593   1
   3   8   5 4.36409 0.68362  -2
   7  -8  -5 4.36409 0.68362   1
   4  -8   4 990.844 2.38251  -2
   7   8  -4 990.844 2.38251   1
  -7   8   3 0.66330 0.52014   1
   5   8   3 0.32956 1.25926  -2
   7  -8  -3 0.32956 1.25926   1
   7   8  -2 1.85913 0.48893   1
   7   8  -1 0.00756 0.52322   1
   6   8   1 266.497 2.40564  -2
   7  -8  -1 266.497 2.40564   1
   7   8   0 0.24512 0.48962  -2
   7  -8   0 0.24512 0.48962   1
  -7   8  -1 0.68243 0.50612   1
   8   8  -1 117.897 1.46846  -2
   7  -8   1 117.897 1.46846   1
  -7   8  -2-0.99907 0.39599   1
   7  -8   3-2.55930 0.43752   1
 -10   8   4 191.390 1.47189  -2
  -7  -8  -4 191.390 1.47189   1
   7  -8   5 0.12421 0.97773   1
  11   8  -5 1.34732 0.91766  -2
   7  -8   5 1.34732 0.91766   1
   7  -8   6 0.57495 0.58172   1
  -7  -8  -7-1.01481 0.67177   1
  12   8  -7 89.6443 2.88239  -2
   7  -8   7 89.6443 2.88239   1
  13   8  -8-1.72071 1.14286  -2
   7  -8   8-1.72071 1.14286   1
   7  -8   9-4.51410 1.36187   1
  14   8  -9 52.2363 1.71962  -2
   7  -8   9 52.2363 1.71962   1
   7   8  10-1.75250 1.24098   1
  -7  -8 -11-2.18439 1.98249   1
  15   8 -11 18.1275 2.00383  -2
   7  -8  11 18.1275 2.00383   1
 -16   8  12 189.115 2.74150  -2
  -7  -8 -12 189.115 2.74150   1
 -17   8  13-5.30230 1.47212  -2
  -7  -8 -13-5.30230 1.47212   1
  -7  -8 -14 7.57989 1.14928   1
  -7  -8 -15-0.56552 1.82077   1
  18   8 -15 589.613 4.17897  -2
   7  -8  15 589.613 4.17897   1
  19  -8 -16 7.76777 2.95107  -2
   7   8  16 7.76777 2.95107   1
  20  -8 -17 17.9196 1.74763  -2
   7   8  17 17.9196 1.74763   1
  -7  -9  19 431.817 3.54534   1
  -7   9  19 468.712 5.33271  -2
   7  -9 -19 468.712 5.33271   1
   7   9 -18 703.917 4.54778   1
  -7   9  18 750.226 6.66728  -2
   7  -9 -18 750.226 6.66728   1
  -6  -9  17 2882.27 9.59429  -2
   7   9 -17 2882.27 9.59429   1
   5   9 -16 5624.04 13.1073  -2
  -7  -9  16 5624.04 13.1073   1
   7   9 -15 86.6322 3.36969   1
   4   9 -15 73.2405 2.02011  -2
  -7  -9  15 73.2405 2.02011   1
   7   9 -14 13854.6 17.7766   1
  -4   9  14 13676.2 24.5344  -2
   7  -9 -14 13676.2 24.5344   1
  -3  -9  13 13408.9 14.7746  -2
   7   9 -13 13408.9 14.7746   1
  -2   9  12 1819.67 6.84295  -2
   7  -9 -12 1819.67 6.84295   1
   7   9 -11 1878.40 9.08357   1
   1   9 -11 1936.35 6.00250  -2
  -7  -9  11 1936.35 6.00250   1
   7  -9 -10 5126.56 6.78695   1
   0   9  -9 5567.63 5.56380  -2
  -7  -9   9 5567.63 5.56380   1
   1   9   8 9199.10 8.86505  -2
   7  -9  -8 9199.10 8.86505   1
  -7   9   7 14193.8 9.16844   1
   2   9   7 14750.3 20.8113  -2
   7  -9  -7 14750.3 20.8113   1
   7   9  -6 126.159 1.00764   1
   7   9  -5 122.699 2.37763   1
  -3  -9  -5 1452.44 3.19200  -2
  -7   9   5 1452.44 3.19200   1
  -4  -9  -4 13577.1 11.5678  -2
  -7   9   4 13577.1 11.5678   1
   7   9  -3 29947.9 16.7519   1
  -5   9  -3 35841.6 20.2442  -2
  -7  -9   3 35841.6 20.2442   1
  -7   9   2 7561.34 5.65234   1
   7   9  -1 8002.76 8.31536   1
  -6   9  -1 7860.19 12.8826  -2
  -7  -9   1 7860.19 12.8826   1
   7  -9   0 90322.7 26.9992  -2
   7   9   0 90322.7 26.9992   1
   7  -9   1 151.874 1.42999   1
   8  -9  -1 113.488 1.14994  -2
   7   9   1 113.488 1.14994   1
   7   9   2 1904.74 3.00201   1
   7  -9   3 3826.78 4.72422   1
   9  -9  -3 5999.16 13.1369  -2
   7   9   3 5999.16 13.1369   1
 -10  -9   4 2054.20 4.11269  -2
  -7   9  -4 2054.20 4.11269   1
  -7   9  -5 2806.97 9.39561   1
  11  -9  -5 3164.16 5.04737  -2
   7   9   5 3164.16 5.04737   1
   7  -9   6 17150.1 12.1926   1
  -7  -9  -7 7976.66 16.5138   1
  12   9  -7 7642.25 11.5821  -2
   7  -9   7 7642.25 11.5821   1
  13  -9  -8 1417.33 5.85762  -2
   7   9   8 1417.33 5.85762   1
 -14   9   9 4217.96 7.54921  -2
  -7  -9  -9 4217.96 7.54921   1
   7  -9  10 37331.1 23.0882   1
  -7  -9 -11 3040.95 11.4381   1
  15  -9 -11 4269.95 9.76683  -2
   7   9  11 4269.95 9.76683   1
  16  -9 -12 5228.60 11.9644  -2
   7   9  12 5228.60 11.9644   1
  17   9 -13 2723.01 6.87553  -2
   7  -9  13 2723.01 6.87553   1
   7   9  14 195.248 2.05272   1
  18   9 -15 400.102 3.53241  -2
   7  -9  15 400.102 3.53241   1
 -19   9  16 3526.88 10.2011  -2
  -7  -9 -16 3526.88 10.2011   1
  -7 -10  18 6.15055 1.33418   1
  -7  10  18-4.11099 3.20518  -2
   7 -10 -18-4.11099 3.20518   1
   6  10 -17 222.639 2.53980  -2
  -7 -10  17 222.639 2.53980   1
  -5  10  16 2.27376 1.68426  -2
   7 -10 -16 2.27376 1.68426   1
   7  10 -15 9.68703 2.16863   1
  -4  10  15 788.722 4.59601  -2
   7 -10 -15 788.722 4.59601   1
   7  10 -14-1.56066 1.41461   1
  -4  10  14 31.6805 2.74090  -2
   7 -10 -14 31.6805 2.74090   1
  -3  10  13 15.5072 1.36843  -2
   7 -10 -13 15.5072 1.36843   1
  -2  10  12 150.221 2.42119  -2
   7 -10 -12 150.221 2.42119   1
   7  10 -11-6.45278 2.65915   1
  -1  10  11 1.95026 1.46291  -2
   7 -10 -11 1.95026 1.46291   1
   7 -10 -10-0.70027 0.88815   1
   0  10   9 2520.60 5.54737  -2
   7 -10  -9 2520.60 5.54737   1
  -1  10  -8 6.18600 3.17609  -2
  -7 -10   8 6.18600 3.17609   1
  -7 -10   7 2.27968 2.53959   1
   2  10   7 188.025 3.26410  -2
   7 -10  -7 188.025 3.26410   1
   7 -10  -6 1.45791 0.81233   1
   7  10  -5 8.87796 1.23677   1
   3  10   5-3.09604 1.13861  -2
   7 -10  -5-3.09604 1.13861   1
   4  10   4 403.480 2.51905  -2
   7 -10  -4 403.480 2.51905   1
   7  10  -3-13.9595 1.13449   1
  -5  10  -3 0.77129 1.61052  -2
  -7 -10   3 0.77129 1.61052   1
   7  10  -2 5.95750 0.84744   1
   7  10  -1 0.50971 0.97708   1
  -6  10  -1 378.565 3.28170  -2
  -7 -10   1 378.565 3.28170   1
   7  10   0 5.50970 1.08401  -2
   7 -10   0 5.50970 1.08401   1
   7 -10   1-2.74167 0.85076   1
   7 -10   2 4.45248 0.81680   1
   7 -10   3 1.54527 1.05204   1
   9 -10  -3 4.93279 1.66368  -2
   7  10   3 4.93279 1.66368   1
  10  10  -4 665.435 3.18544  -2
   7 -10   4 665.435 3.18544   1
  -7 -10  -5-5.03972 1.78240   1
  11  10  -5-2.39631 1.38183  -2
   7 -10   5-2.39631 1.38183   1
  -7 -10  -6 2.12123 0.95545   1
  -7 -10  -7-14.7206 1.94293   1
  12  10  -7 370.352 3.05998  -2
   7 -10   7 370.352 3.05998   1
  13  10  -8 7.73688 1.35130  -2
   7 -10   8 7.73688 1.35130   1
  -7 -10  -9 1.33981 1.94766   1
  14  10  -9 350.544 3.32392  -2
   7 -10   9 350.544 3.32392   1
   7  10  10 2.28682 1.17621   1
  -7 -10 -11 9.53200 1.83249   1
  15 -10 -11-2.70609 1.62290  -2
   7  10  11-2.70609 1.62290   1
  16 -10 -12 125.076 2.57653  -2
   7  10  12 125.076 2.57653   1
 -17  10  13 2.12637 1.37582  -2
  -7 -10 -13 2.12637 1.37582   1
   7 -10  14-1.69373 1.14184   1
  -7 -10 -15-11.4687 1.83088   1
  18 -10 -15 588.926 4.28717  -2
   7  10  15 588.926 4.28717   1
  -6  11  17 8627.53 13.6206  -2
   7 -11 -17 8627.53 13.6206   1
  -5  11  16 346.683 3.36970  -2
   7 -11 -16 346.683 3.36970   1
   7  11 -15 10308.0 24.1410   1
   4  11 -15 10036.4 20.1238  -2
  -7 -11  15 10036.4 20.1238   1
   7 -11 -14 1630.02 5.29827   1
   3  11 -13 2299.20 6.42609  -2
  -7 -11  13 2299.20 6.42609   1
  -2 -11  12 4666.06 11.3272  -2
   7  11 -12 4666.06 11.3272   1
   7  11 -11 7048.01 18.7114   1
  -1  11  11 9198.52 20.0942  -2
   7 -11 -11 9198.52 20.0942   1
   7 -11 -10 3092.75 8.61080   1
   0  11   9 26347.8 32.8781  -2
   7 -11  -9 26347.8 32.8781   1
  -1  11  -8 15445.9 23.4943  -2
  -7 -11   8 15445.9 23.4943   1
  -7 -11   7 294.264 3.96034   1
   2  11   7 82.1333 2.33006  -2
   7 -11  -7 82.1333 2.33006   1
   7 -11  -6 1738.41 5.82763   1
  -7 -11   5 84.9219 2.95976   1
   3  11   5 101.230 1.89354  -2
   7 -11  -5 101.230 1.89354   1
  -4  11  -4 121.172 3.88638  -2
  -7 -11   4 121.172 3.88638   1
   7  11  -3 595.686 2.59476   1
  -7 -11   2 208.667 3.24715   1
  -7 -11   1 157.855 2.97146   1
  -7  11   0 980.085 5.96088  -2
  -7 -11   0 980.085 5.96088   1
  -7 -11  -1 29.9177 1.87894   1
  -7 -11  -2 187.698 2.00386   1
  -7 -11  -3 21.7287 1.88337   1
   9  11  -3 191.360 2.52210  -2
   7 -11   3 191.360 2.52210   1
  10  11  -4 29.1765 1.34814  -2
   7 -11   4 29.1765 1.34814   1
  -7 -11  -5 47655.8 41.6851   1
  11  11  -5 51865.7 30.6453  -2
   7 -11   5 51865.7 30.6453   1
   7 -11   6 431.556 2.52351   1
   7 -11   7 4903.09 9.90199   1
  12 -11  -7 4811.64 14.9613  -2
   7  11   7 4811.64 14.9613   1
 -13  11   8 5764.29 12.2000  -2
  -7 -11  -8 5764.29 12.2000   1
  -7 -11  -9 33.0766 1.57654   1
  14  11  -9 22.8054 1.60663  -2
   7 -11   9 22.8054 1.60663   1
   7  11  10 128.030 1.56479   1
  -7 -11 -11 14203.1 24.8303   1
  15  11 -11 15225.6 20.2102  -2
   7 -11  11 15225.6 20.2102   1
  16 -11 -12 3375.73 12.2374  -2
   7  11  12 3375.73 12.2374   1
  -7 -11 -13 162.579 2.80464   1
  17 -11 -13 249.335 4.02791  -2
   7  11  13 249.335 4.02791   1
  -4  12  15 3997.99 14.3787  -2
   7 -12 -15 3997.99 14.3787   1
   7  12 -14 4.11517 2.08554   1
  -4  12  14 224.775 3.65965  -2
   7 -12 -14 224.775 3.65965   1
  -3  12  13 9.97918 1.77679  -2
   7 -12 -13 9.97918 1.77679   1
  -2  12  12 468.522 4.00269  -2
   7 -12 -12 468.522 4.00269   1
  -1  12  11 8.96713 2.75456  -2
   7 -12 -11 8.96713 2.75456   1
   7 -12 -10 1.11796 1.16906   1
   0  12   9 20.1519 2.20692  -2
   7 -12  -9 20.1519 2.20692   1
  -1  12  -8 0.31862 1.24765  -2
  -7 -12   8 0.31862 1.24765   1
  -7 -12   7-2.38138 2.56317   1
   2  12   7 4155.95 12.6374  -2
   7 -12  -7 4155.95 12.6374   1
  -7 -12   6 3.80908 2.19627   1
  -7 -12   5 6.39092 2.35203   1
  -4  12  -4 373.609 6.09391  -2
  -7 -12   4 373.609 6.09391   1
  -7 -12   3-16.7112 1.95170   1
  -7 -12   2 2.67670 1.83986   1
  -7 -12   1-4.38592 1.74055   1
  -7  12   0 1.18034 2.20541  -2
  -7 -12   0 1.18034 2.20541   1
  -7 -12  -1 3.72765 1.62011   1
  -7 -12  -2 0.14551 1.47631   1
  -7 -12  -3 1.77809 1.41991   1
  10  12  -4 3.38817 1.99606  -2
   7 -12   4 3.38817 1.99606   1
  -7 -12  -5 1.98730 1.56903   1
  11  12  -5-0.10289 1.66364  -2
   7 -12   5-0.10289 1.66364   1
   7 -12   6 0.05588 0.92472   1
   7 -12   7-3.68323 0.98215   1
  12 -12  -7 172.668 3.13179  -2
   7  12   7 172.668 3.13179   1
  13 -12  -8 5.16627 1.56434  -2
   7  12   8 5.16627 1.56434   1
  -7 -12  -9 5.03587 1.39308   1
  14  12  -9 158.728 2.29377  -2
   7 -12   9 158.728 2.29377   1
   7  12  10-3.93349 1.00419   1
  15 -12 -11 24.6959 2.83939  -2
   7  12  11 24.6959 2.83939   1
  16  12 -12 26.0819 1.53070  -2
   7 -12  12 26.0819 1.53070   1
  -3  13  13 203.374 2.78200  -2
   7 -13 -13 203.374 2.78200   1
  -2 -13  12 5034.54 15.2052  -2
   7  13 -12 5034.54 15.2052   1
   7  13 -11 5465.82 17.0384   1
   7  13 -10 40.5549 2.10033   1
  -1  13  10 540.573 5.14072  -2
   7 -13 -10 540.573 5.14072   1
   0 -13   9 4515.51 14.4187  -2
   7  13  -9 4515.51 14.4187   1
  -7 -13   7 3478.44 13.0528   1
  -7 -13   6 3218.74 12.3133   1
  -7 -13   5 188.248 3.70511   1
  -4  13  -4 10054.3 27.8763  -2
  -7 -13   4 10054.3 27.8763   1
  -7 -13   3 345.052 4.49750   1
  -7 -13   2 3734.88 12.6241   1
  -7 -13   1 15404.4 24.7809   1
  -7  13   0 22526.9 29.9639  -2
  -7 -13   0 22526.9 29.9639   1
  -7 -13  -2 49.5432 1.81353   1
  -7 -13  -3 53.3174 1.64379   1
 -10  13   4 5132.22 14.0142  -2
  -7 -13  -4 5132.22 14.0142   1
  -7 -13  -5 2601.60 10.8139   1
  -7 -13  -6 1927.55 8.94430   1
  -7 -13  -7 1302.39 7.47466   1
  12  13  -7 1178.93 6.79393  -2
   7 -13   7 1178.93 6.79393   1
  13  13  -8 1411.88 10.5596  -2
   7 -13   8 1411.88 10.5596   1
  14  13  -9 1556.90 4.87489  -2
   7 -13   9 1556.90 4.87489   1
   7 -13  10 2341.31 7.89281   1
   7  14 -10-11.2669 2.15839   1
   0 -14   9 312.789 4.22176  -2
   7  14  -9 312.789 4.22176   1
  -7 -14   6 13.4292 1.78141   1
  -3  14  -5-4.26281 2.41741  -2
  -7 -14   5-4.26281 2.41741   1
  -4  14  -4 61.5648 2.38575  -2
  -7 -14   4 61.5648 2.38575   1
  -7 -14   3 5.21611 1.86663   1
  -7 -14   2 19.3202 1.98556   1
  -7 -14   1 12.6181 1.75210   1
  -7  14   0 7.09642 2.28722  -2
  -7 -14   0 7.09642 2.28722   1
  -7 -14  -1-12.6156 1.85602   1
  -7 -14  -2 0.75264 1.67080   1
  -7 -14  -3-0.95762 1.47540   1
 -10  14   4 21.7637 2.24723  -2
  -7 -14  -4 21.7637 2.24723   1
  -7 -14  -5 26.7671 1.66296   1
  -7 -15   5 552.325 4.95467   1
   8   0 -22 15613.6 27.7113   1
  -8   0  21 11.2585 1.95795  -2
   8   0 -21 11.2585 1.95795   1
   7   0 -20 30529.7 32.6469  -2
  -8   0  20 30529.7 32.6469   1
  -8   0  19 4059.28 9.25506   1
   8   0 -18 3383.82 8.11411   1
   5   0 -17 152.443 1.44301  -2
  -8   0  17 152.443 1.44301   1
   4   0 -16 5587.18 9.08839  -2
  -8   0  16 5587.18 9.08839   1
  -8   0  15 2581.99 4.69249   1
   8   0 -14 44057.3 18.1697   1
   2   0 -13 35591.5 12.6143  -2
  -8   0  13 35591.5 12.6143   1
  -1   0  12 7976.56 6.76849  -2
   8   0 -12 7976.56 6.76849   1
   8   0 -11 83246.6 15.9982   1
   8   0 -10 40308.4 10.5938   1
   8   0  -9 402.923 1.43173   1
  -1   0  -9 361.414 1.61251  -2
  -8   0   9 361.414 1.61251   1
   2   0   8 2759.21 3.42457  -2
   8   0  -8 2759.21 3.42457   1
   8   0  -7 1008.28 1.70255   1
   8   0  -6 52996.7 11.6682   1
  -8   0   5 5254.65 4.47922   1
   4   0   5 11225.2 11.7416  -2
   8   0  -5 11225.2 11.7416   1
  -5   0  -4 6375.67 5.55719  -2
  -8   0   4 6375.67 5.55719   1
   8   0  -3 31385.5 10.3035   1
  -8   0   2 335189. 33.2855   1
  -7   0  -1 21385.6 7.88933  -2
  -8   0   1 21385.6 7.88933   1
   8   0   0 23902.2 10.7159  -2
   8   0   0 23902.2 10.7159   1
   8   0   1 32962.5 9.69080   1
   8   0   2 41154.6 11.0931   1
   8   0   3 780.390 1.31001   1
  11   0  -4 14209.3 6.95648  -2
   8   0   4 14209.3 6.95648   1
   8   0   5 1316.47 2.01461   1
 -12   0   5 5033.94 8.24925  -2
  -8   0  -5 5033.94 8.24925   1
   8   0   6 59134.8 12.6849   1
  -8   0  -7 87774.6 18.6976   1
 -14   0   8 6271.70 5.88089  -2
  -8   0  -8 6271.70 5.88089   1
  15   0  -9 45692.4 14.0342  -2
   8   0   9 45692.4 14.0342   1
  -8   0 -10 37605.6 14.0019   1
   8   0  11 4659.06 6.04104   1
  17   0 -12 1696.87 4.91556  -2
   8   0  12 1696.87 4.91556   1
   8   0  13 2800.48 11.3121   1
 -18   0  13 3244.22 6.00392  -2
  -8   0 -13 3244.22 6.00392   1
  -8   0 -14 2077.00 9.37243   1
  -8   0 -15 2739.02 11.0522   1
 -20   0  16 14032.2 31.9580  -2
  -8   0 -16 14032.2 31.9580   1
  -8   0 -18 26192.9 37.5145   1
  -8   0 -19 22736.0 35.9225   1
 -23   0  20 161.709 3.63202  -2
  -8   0 -20 161.709 3.63202   1
 -10  -1  24 9.96301 1.84282  -2
   8   1 -24 9.96301 1.84282   1
   8   1 -23-0.06301 1.81213   1
   8   1 -22-1.07888 1.08143   1
  -8   1  21 4.91882 1.30575  -2
   8  -1 -21 4.91882 1.30575   1
   7   1 -20 2405.91 7.62173  -2
  -8  -1  20 2405.91 7.62173   1
   8   1 -19-4.54584 0.83417   1
   8   1 -18 3.62264 0.74387   1
  -5  -1  17 15.4144 0.66751  -2
   8   1 -17 15.4144 0.66751   1
   4   1 -16 2.98389 0.61754  -2
  -8  -1  16 2.98389 0.61754   1
   8   1 -15 1.87964 0.44954   1
   8   1 -14 1.56304 0.43067   1
  -2   1  13 3.75966 0.48815  -2
   8  -1 -13 3.75966 0.48815   1
  -1  -1  12 383.342 1.32544  -2
   8   1 -12 383.342 1.32544   1
   8   1 -11-1.03992 0.29872   1
   8   1 -10 0.74061 0.25902   1
  -8  -1   9 0.28442 0.32448   1
   1  -1   9 3921.84 3.47080  -2
   8   1  -9 3921.84 3.47080   1
   2  -1   8 0.40455 0.33921  -2
   8   1  -8 0.40455 0.33921   1
   8  -1  -7 0.38200 0.28750   1
   8  -1  -6 0.15091 0.26724   1
  -8  -1   5-0.67338 0.29676   1
   4  -1   5 1.06665 0.70441  -2
   8   1  -5 1.06665 0.70441   1
  -5  -1  -4 323.112 0.92795  -2
  -8   1   4 323.112 0.92795   1
  -8  -1   3 0.92912 0.29023   1
   8  -1  -2-0.24223 0.32149   1
  -8   1   1 1.01615 0.51697   1
   7   1   1 19.8867 0.57705  -2
   8  -1  -1 19.8867 0.57705   1
  -8   1   0 0.88912 0.34088  -2
  -8  -1   0 0.88912 0.34088   1
  -8   1  -1 1.68009 0.33575   1
   9   1  -1 482.916 1.34173  -2
   8  -1   1 482.916 1.34173   1
  -8   1  -2 0.79034 0.24626   1
  -8   1  -3 1.59505 0.26330   1
  11  -1  -4 92.0208 0.56434  -2
   8   1   4 92.0208 0.56434   1
   8   1   5 1.08822 0.26682   1
  12   1  -5 2.29989 0.75857  -2
   8  -1   5 2.29989 0.75857   1
   8   1   6 0.10576 0.27084   1
  -8   1  -7-0.27242 0.29400   1
 -14  -1   8 3.90314 0.52479  -2
  -8   1  -8 3.90314 0.52479   1
  -8   1  -9 6.83714 0.74677   1
 -15  -1   9 218.333 0.96408  -2
  -8   1  -9 218.333 0.96408   1
  -8  -1 -10 3.06477 0.38106   1
  -8   1 -11-1.28538 0.38907   1
  17  -1 -12 583.290 2.07467  -2
   8   1  12 583.290 2.07467   1
 -18  -1  13 9.71618 0.93584  -2
  -8   1 -13 9.71618 0.93584   1
  -8   1 -14 5.43618 0.94032   1
  -8   1 -15 5.56971 1.35826   1
 -21   1  17 55.2550 1.89824  -2
  -8  -1 -17 55.2550 1.89824   1
  -8   1 -18-4.92896 1.14520   1
  -8   1 -19 1.78489 1.33075   1
 -23   1  20 739.366 5.30879  -2
  -8  -1 -20 739.366 5.30879   1
 -10  -2  24 2227.58 13.9206  -2
   8   2 -24 2227.58 13.9206   1
   8   2 -23 329.677 2.90971   1
  -8  -2  22 93.4776 1.30815   1
   8   2 -21 1622.99 5.15706  -2
  -8  -2  21 1622.99 5.15706   1
  -7  -2  20 5217.48 11.3356  -2
   8   2 -20 5217.48 11.3356   1
   8  -2 -19 13385.7 13.8299   1
   8   2 -18 4795.77 8.04965   1
   5  -2 -17 12029.2 7.68174  -2
  -8   2  17 12029.2 7.68174   1
   4  -2 -16 23469.2 12.2477  -2
  -8   2  16 23469.2 12.2477   1
   8   2 -15 18981.0 8.16809   1
   8   2 -14 19734.8 7.45452   1
   8  -2 -13 6352.72 13.9955   1
  -2   2  13 7871.87 4.49312  -2
   8  -2 -13 7871.87 4.49312   1
  -1   2  12 4329.96 4.18696  -2
   8  -2 -12 4329.96 4.18696   1
  -8  -2  11 892.193 1.44574   1
   8  -2 -10 573.070 1.12216   1
  -8  -2   9 46306.6 12.9786   1
  -1  -2  -9 44755.7 11.6046  -2
  -8   2   9 44755.7 11.6046   1
   2   2   8 3598.05 3.00802  -2
   8  -2  -8 3598.05 3.00802   1
   8  -2  -7 64611.9 9.24647   1
   8  -2  -6 68262.8 9.18627   1
   8  -2  -5 186.745 1.47153   1
   4   2   5 473.201 2.77618  -2
   8  -2  -5 473.201 2.77618   1
  -5   2  -4 248.964 1.30906  -2
  -8  -2   4 248.964 1.30906   1
   8  -2  -3 1359.86 1.37624   1
   8  -2  -2 17044.3 4.66767   1
  -8   2   1 385.859 0.96508   1
   7   2   1 340.059 1.63964  -2
   8  -2  -1 340.059 1.63964   1
   8   2   0 1195.66 1.47525  -2
   8  -2   0 1195.66 1.47525   1
  -8   2  -1 803.923 1.55170   1
  -9   2   1 719.645 1.82811  -2
  -8  -2  -1 719.645 1.82811   1
   8  -2   2 55287.4 7.86231   1
  -8   2  -3 30899.0 5.97374   1
  11  -2  -4 7381.65 4.18968  -2
   8   2   4 7381.65 4.18968   1
   8   2   5 83829.6 14.5490   1
 -12   2   5 103724. 23.3949  -2
  -8  -2  -5 103724. 23.3949   1
  -8   2  -6 21447.0 6.90956   1
   8  -2   7 9877.16 4.79978   1
 -13   2   7 9893.61 13.2253  -2
  -8  -2  -7 9893.61 13.2253   1
  14   2  -8 931.714 1.87536  -2
   8  -2   8 931.714 1.87536   1
  -8  -2  -9 2810.58 7.42492   1
 -15   2   9 2786.69 2.75319  -2
  -8  -2  -9 2786.69 2.75319   1
  -8   2 -10 16906.4 7.21510   1
  -8  -2 -11 11897.8 7.34202   1
 -16  -2  11 18073.9 22.1954  -2
  -8   2 -11 18073.9 22.1954   1
 -17  -2  12 12298.9 10.7376  -2
  -8   2 -12 12298.9 10.7376   1
  18  -2 -13 27881.9 13.9368  -2
   8   2  13 27881.9 13.9368   1
  -8  -2 -14 18607.1 13.4050   1
  -8   2 -15 8324.43 13.6617   1
  19  -2 -15 8852.22 18.5003  -2
   8   2  15 8852.22 18.5003   1
 -20  -2  16 149.705 2.09639  -2
  -8   2 -16 149.705 2.09639   1
 -21   2  17 60.8502 2.57299  -2
  -8  -2 -17 60.8502 2.57299   1
  -8   2 -18 34.7417 1.43782   1
  -8   2 -19 81.0127 1.69509   1
 -23   2  20 3201.91 11.0012  -2
  -8  -2 -20 3201.91 11.0012   1
   8   3 -23-8.92909 1.34890   1
   8   3 -22 4.25139 1.40821   1
   8   3 -21 25.8280 2.46698  -2
  -8  -3  21 25.8280 2.46698   1
  -7  -3  20 757.215 5.80381  -2
   8   3 -20 757.215 5.80381   1
  -8  -3  19 0.37460 1.60431   1
  -6   3  19 0.06863 2.29924  -2
   8  -3 -19 0.06863 2.29924   1
   8  -3 -18 3.72169 0.76275   1
  -5   3  17 43.5110 1.04451  -2
   8  -3 -17 43.5110 1.04451   1
  -4   3  16 7.40790 0.72966  -2
   8  -3 -16 7.40790 0.72966   1
  -8   3  15 2.45382 0.46400   1
  -3   3  15 3515.37 10.0987  -2
   8  -3 -15 3515.37 10.0987   1
   8  -3 -14 2.62246 0.40626   1
  -2  -3  13 2.33202 0.49068  -2
   8   3 -13 2.33202 0.49068   1
  -1   3  12 255.366 1.15785  -2
   8  -3 -12 255.366 1.15785   1
   8  -3 -11 1.61385 0.33755   1
   8  -3 -10 2.64654 0.38788   1
   8  -3  -9-0.04673 0.54459   1
   1  -3   9 12566.3 7.25530  -2
   8   3  -9 12566.3 7.25530   1
  -2   3  -8 2.77457 0.44890  -2
  -8  -3   8 2.77457 0.44890   1
   8   3  -7-0.09204 0.28459   1
  -8  -3   6 0.05284 0.21620   1
   8  -3  -5-1.10025 0.24787   1
  -4   3  -5 2.24940 0.69900  -2
  -8  -3   5 2.24940 0.69900   1
   5   3   4 141.467 0.58392  -2
   8  -3  -4 141.467 0.58392   1
  -8  -3   3 0.46925 0.21933   1
   8  -3  -2 1.45858 0.17065   1
   8   3  -1 2.99108 0.25221   1
  -7   3  -1 2380.59 5.01635  -2
  -8  -3   1 2380.59 5.01635   1
  -8   3   0 1.66280 0.28669  -2
  -8  -3   0 1.66280 0.28669   1
   8   3   1-0.67573 0.34228   1
  -9  -3   1 1737.35 1.69490  -2
  -8   3  -1 1737.35 1.69490   1
   8  -3   2 1.16088 0.30430   1
  -8   3  -3 0.82798 0.33665   1
 -10   3   3-4.18843 1.46978  -2
  -8  -3  -3-4.18843 1.46978   1
 -11  -3   4 1541.41 2.16264  -2
  -8   3  -4 1541.41 2.16264   1
   8  -3   5-0.50623 0.42504   1
 -12   3   5 6.40212 0.68307  -2
  -8  -3  -5 6.40212 0.68307   1
   8   3   6-0.84771 0.38224   1
  -8  -3  -7 4.05883 0.38877   1
 -14  -3   8 2.63650 0.55803  -2
  -8   3  -8 2.63650 0.55803   1
   8   3   9 5.96658 0.72573   1
  15   3  -9 55.9027 0.73121  -2
   8  -3   9 55.9027 0.73121   1
  -8  -3 -10 0.58138 0.42509   1
  -8   3 -11-0.20997 0.49684   1
  17   3 -12 1652.63 3.86062  -2
   8  -3  12 1652.63 3.86062   1
 -18  -3  13 0.92065 1.04694  -2
  -8   3 -13 0.92065 1.04694   1
  -8   3 -14-3.08274 0.82513   1
  -8  -3 -15 0.45227 2.20342   1
  19  -3 -15 4772.90 9.46241  -2
   8   3  15 4772.90 9.46241   1
  20   3 -16-2.80630 1.11463  -2
   8  -3  16-2.80630 1.11463   1
 -21  -3  17 663.687 4.37394  -2
  -8   3 -17 663.687 4.37394   1
  -8   3 -18-5.96739 1.28302   1
  -8   3 -19-17.4669 1.80988   1
   8   4 -23 2891.93 8.91706   1
   8   4 -22 6439.71 13.2265   1
   8   4 -21 51.9476 1.76115  -2
  -8  -4  21 51.9476 1.76115   1
  -7  -4  20 17483.7 22.0715  -2
   8   4 -20 17483.7 22.0715   1
   8   4 -19 4468.84 10.5866   1
  -6   4  19 4335.24 13.0839  -2
   8  -4 -19 4335.24 13.0839   1
  -8  -4  18 99.0277 1.67789   1
  -5  -4  17 1305.52 4.54201  -2
   8   4 -17 1305.52 4.54201   1
  -4  -4  16 473.996 2.89647  -2
   8   4 -16 473.996 2.89647   1
   8   4 -15 7727.56 6.95482   1
   8  -4 -14 25381.1 10.9744   1
  -2   4  13 12470.0 7.04555  -2
   8  -4 -13 12470.0 7.04555   1
  -1  -4  12 5875.89 5.92492  -2
   8   4 -12 5875.89 5.92492   1
   8  -4 -11 36036.7 10.6858   1
  -8   4  10 19784.1 7.57213   1
  -8  -4   9 1249.52 3.80793   1
  -1  -4  -9 1145.20 1.78031  -2
  -8   4   9 1145.20 1.78031   1
   2  -4   8 749.450 1.68410  -2
   8   4  -8 749.450 1.68410   1
   8  -4  -7 7961.11 3.95739   1
   3   4   7 7973.17 11.7703  -2
   8  -4  -7 7973.17 11.7703   1
   8  -4  -6 19917.6 5.54475   1
   8  -4  -5 1686.92 1.94429   1
   4  -4   5 4216.99 5.87068  -2
   8   4  -5 4216.99 5.87068   1
  -5  -4  -4 42.6816 0.53083  -2
  -8   4   4 42.6816 0.53083   1
   8  -4  -3 11019.9 4.90890   1
   6   4   3 12729.2 9.37405  -2
   8  -4  -3 12729.2 9.37405   1
  -8  -4   2 175056. 16.1830   1
   8  -4  -1 7231.95 6.99011   1
   7   4   1 9491.72 6.72676  -2
   8  -4  -1 9491.72 6.72676   1
   8  -4   0 2996.08 2.00547  -2
   8   4   0 2996.08 2.00547   1
   8   4   1 13936.9 5.26781   1
   9   4  -1 13168.7 9.84352  -2
   8  -4   1 13168.7 9.84352   1
  -8   4  -2 7761.20 3.70801   1
   8   4   3 2986.62 2.55560   1
 -10   4   3 4667.42 8.31217  -2
  -8  -4  -3 4667.42 8.31217   1
  11   4  -4 17765.2 6.56374  -2
   8  -4   4 17765.2 6.56374   1
   8   4   5 9098.54 5.47739   1
  12   4  -5 15320.2 8.25894  -2
   8  -4   5 15320.2 8.25894   1
  -8  -4  -6 51944.7 11.7983   1
   8  -4   7 43958.7 11.4036   1
  14  -4  -8 3389.77 4.06818  -2
   8   4   8 3389.77 4.06818   1
 -15  -4   9 18616.6 7.21470  -2
  -8   4  -9 18616.6 7.21470   1
  -8   4 -10 22338.0 9.33645   1
   8  -4  11 6374.96 5.50285   1
  16  -4 -11 7382.09 16.4854  -2
   8   4  11 7382.09 16.4854   1
 -17   4  12 118.800 1.31051  -2
  -8  -4 -12 118.800 1.31051   1
  18   4 -13 301.853 2.08966  -2
   8  -4  13 301.853 2.08966   1
  -8  -4 -14 105.025 1.34972   1
  -8  -4 -15 1943.41 5.65570   1
  19   4 -15 1873.37 8.32195  -2
   8  -4  15 1873.37 8.32195   1
  20   4 -16 6404.94 11.0489  -2
   8  -4  16 6404.94 11.0489   1
  21   4 -17 496.913 2.52560  -2
   8  -4  17 496.913 2.52560   1
  -8  -4 -18 12136.1 12.4902   1
  -8   4 -19 12987.2 18.8703   1
   8   5 -22-1.02948 1.49433   1
  -8   5  21 7.55164 1.49019  -2
   8  -5 -21 7.55164 1.49019   1
  -7  -5  20 3408.45 9.93770  -2
   8   5 -20 3408.45 9.93770   1
   8   5 -19 12.5735 1.44204   1
  -6   5  19 22.7012 2.61695  -2
   8  -5 -19 22.7012 2.61695   1
   8  -5 -18 3.41677 1.06271   1
   5   5 -17 10.7829 1.60574  -2
  -8  -5  17 10.7829 1.60574   1
  -4  -5  16-1.45243 1.49623  -2
   8   5 -16-1.45243 1.49623   1
  -8  -5  15 3.86990 1.64438   1
  -3   5  15 8952.97 17.4097  -2
   8  -5 -15 8952.97 17.4097   1
   8  -5 -14-4.14844 0.56468   1
  -2   5  13 3.08884 0.74887  -2
   8  -5 -13 3.08884 0.74887   1
  -1  -5  12 1687.63 3.61803  -2
   8   5 -12 1687.63 3.61803   1
   8   5 -11-1.40887 0.60432   1
   0   5  11 4.21291 2.03326  -2
   8  -5 -11 4.21291 2.03326   1
  -8  -5  10 2.88901 0.46243   1
   8   5  -9-0.73781 0.65475   1
   1   5   9 222.233 1.18479  -2
   8  -5  -9 222.233 1.18479   1
  -2   5  -8 1.61005 0.66475  -2
  -8  -5   8 1.61005 0.66475   1
   8  -5  -7 0.58578 0.39457   1
   8  -5  -6 2.22872 0.38020   1
   8   5  -5 1.22071 0.42926   1
  -4   5  -5-0.06416 0.98572  -2
  -8  -5   5-0.06416 0.98572   1
   5   5   4 371.557 1.15379  -2
   8  -5  -4 371.557 1.15379   1
  -8  -5   3 0.52305 0.28766   1
  -6   5  -3 12.4883 1.06576  -2
  -8  -5   3 12.4883 1.06576   1
   8  -5  -2 0.11999 0.30411   1
   8  -5  -1 0.08647 0.40241   1
   7   5   1 965.028 1.90200  -2
   8  -5  -1 965.028 1.90200   1
  -8  -5   0 1.22419 0.51593  -2
  -8   5   0 1.22419 0.51593   1
   8   5   1 2.63384 0.58458   1
   9  -5  -1 3249.63 3.68890  -2
   8   5   1 3249.63 3.68890   1
   8  -5   2 2.81247 0.35731   1
   8  -5   3 0.75488 0.35377   1
 -11  -5   4 91.7819 0.82290  -2
  -8   5  -4 91.7819 0.82290   1
   8   5   5-2.50800 0.53085   1
  12   5  -5 3.14147 0.77165  -2
   8  -5   5 3.14147 0.77165   1
   8   5   6-3.72296 0.36301   1
  -8   5  -7 4.74120 0.39936   1
  14  -5  -8-0.55219 0.61418  -2
   8   5   8-0.55219 0.61418   1
  15  -5  -9 352.696 1.36487  -2
   8   5   9 352.696 1.36487   1
   8   5  10 0.59281 0.46829   1
  -8   5 -11 4.72655 0.60317   1
  16  -5 -11 8.66592 1.27072  -2
   8   5  11 8.66592 1.27072   1
  17   5 -12 87.7795 1.62975  -2
   8  -5  12 87.7795 1.62975   1
 -18  -5  13 1.31515 1.15612  -2
  -8   5 -13 1.31515 1.15612   1
   8  -5  14 11.0717 0.83713   1
  -8   5 -15 5.14944 1.08935   1
  19   5 -15 9.56003 2.14484  -2
   8  -5  15 9.56003 2.14484   1
  20  -5 -16 3.89719 1.15158  -2
   8   5  16 3.89719 1.15158   1
 -21   5  17 14.1152 1.57165  -2
  -8  -5 -17 14.1152 1.57165   1
   8   5  18 8.31375 0.95073   1
  -8   5 -19 1.05738 2.08478   1
  22  -5 -19-3.72221 1.97946  -2
   8   5  19-3.72221 1.97946   1
   8   6 -22 4893.74 12.0019   1
  -8   6  21 2215.24 9.61544  -2
   8  -6 -21 2215.24 9.61544   1
   7   6 -20 12692.7 19.7259  -2
  -8  -6  20 12692.7 19.7259   1
   8   6 -19 8913.52 15.2089   1
  -6   6  19 10074.3 21.1886  -2
   8  -6 -19 10074.3 21.1886   1
  -8  -6  18 114.044 1.81746   1
  -5   6  17 2591.56 6.89894  -2
   8  -6 -17 2591.56 6.89894   1
  -4   6  16 2935.02 8.73522  -2
   8  -6 -16 2935.02 8.73522   1
   8   6 -15 2117.17 9.71108   1
   3   6 -15 2061.01 6.47279  -2
  -8  -6  15 2061.01 6.47279   1
   8  -6 -14 25338.0 12.6767   1
   2  -6 -13 287.972 1.33195  -2
  -8   6  13 287.972 1.33195   1
  -1  -6  12 1786.48 3.83259  -2
   8   6 -12 1786.48 3.83259   1
  -8  -6  11 10613.7 8.05795   1
   0   6  11 13389.3 13.5285  -2
   8  -6 -11 13389.3 13.5285   1
  -8   6  10 1573.90 2.79018   1
   8   6  -9 8310.99 14.6553   1
   1   6   9 8499.33 5.86371  -2
   8  -6  -9 8499.33 5.86371   1
   2   6   8 4552.80 4.87490  -2
   8  -6  -8 4552.80 4.87490   1
  -8  -6   7 14663.9 6.36339   1
  -8  -6   6 10391.3 5.15957   1
   8   6  -5 244.218 1.21730   1
  -4  -6  -5 960.787 2.22952  -2
  -8   6   5 960.787 2.22952   1
   5   6   4 8283.17 6.31263  -2
   8  -6  -4 8283.17 6.31263   1
   8  -6  -3 13047.0 5.22231   1
  -6   6  -3 19349.4 11.3381  -2
  -8  -6   3 19349.4 11.3381   1
  -8   6   2 56328.2 10.0323   1
  -8   6   1 767.240 1.48036   1
   7   6   1 925.197 4.20110  -2
   8  -6  -1 925.197 4.20110   1
   8  -6   0 19505.6 7.93153  -2
   8   6   0 19505.6 7.93153   1
   8   6   1 5701.04 4.76017   1
  -9   6   1 5723.59 5.86367  -2
  -8  -6  -1 5723.59 5.86367   1
   8  -6   2 2710.92 3.05980   1
  -8   6  -3 303.515 1.10497   1
  11  -6  -4 670.444 1.88460  -2
   8   6   4 670.444 1.88460   1
   8  -6   5 22966.2 17.0863   1
 -12   6   5 26614.3 10.8441  -2
  -8  -6  -5 26614.3 10.8441   1
  -8   6  -6 11126.6 6.49590   1
   8   6   7 34195.6 14.3436   1
  13   6  -7 33723.0 29.2018  -2
   8  -6   7 33723.0 29.2018   1
  14   6  -8 1798.82 4.16482  -2
   8  -6   8 1798.82 4.16482   1
 -15  -6   9 1411.55 3.13006  -2
  -8   6  -9 1411.55 3.13006   1
   8   6  10 20889.2 11.1228   1
  -8  -6 -11 3817.15 8.28269   1
  16   6 -11 5659.02 10.3093  -2
   8  -6  11 5659.02 10.3093   1
  17  -6 -12 2283.13 6.34966  -2
   8   6  12 2283.13 6.34966   1
 -18   6  13 6824.80 8.25996  -2
  -8  -6 -13 6824.80 8.25996   1
  -8  -6 -14 1900.68 4.72739   1
  -8   6 -15 8873.37 11.7793   1
  19  -6 -15 9726.53 22.8451  -2
   8   6  15 9726.53 22.8451   1
 -20  -6  16 1743.88 7.92476  -2
  -8   6 -16 1743.88 7.92476   1
  -8   6 -17 82.4729 2.09794   1
  21   6 -17 69.6091 1.96016  -2
   8  -6  17 69.6091 1.96016   1
  -8  -6 -18 5070.31 9.54764   1
   8   7 -21-6.40182 2.05669  -2
  -8  -7  21-6.40182 2.05669   1
  -7   7  20 347.444 3.42019  -2
   8  -7 -20 347.444 3.42019   1
   8   7 -19-4.14292 2.14077   1
  -6   7  19 7.90554 1.83944  -2
   8  -7 -19 7.90554 1.83944   1
  -8  -7  18 13.1120 1.67840   1
  -6   7  18 36.8730 2.73055  -2
   8  -7 -18 36.8730 2.73055   1
  -5   7  17 94.2842 2.10710  -2
   8  -7 -17 94.2842 2.10710   1
   4   7 -16-3.65772 1.65677  -2
  -8  -7  16-3.65772 1.65677   1
  -8  -7  15-3.35036 1.70513   1
  -3   7  15 1537.37 8.25345  -2
   8  -7 -15 1537.37 8.25345   1
  -8  -7  14 3.36186 1.27723   1
  -2   7  13 4.12124 0.97982  -2
   8  -7 -13 4.12124 0.97982   1
  -1  -7  12 357.607 2.08722  -2
   8   7 -12 357.607 2.08722   1
  -8   7  11-1.77344 0.97322   1
   0   7 -11-0.09188 0.96233  -2
  -8  -7  11-0.09188 0.96233   1
  -8  -7  10-0.33213 0.55320   1
   8   7  -9 8.57808 1.17423   1
  -1  -7  -9 9218.80 7.09519  -2
  -8   7   9 9218.80 7.09519   1
   2   7   8 0.52561 0.67737  -2
   8  -7  -8 0.52561 0.67737   1
  -8  -7   7 0.81081 0.87500   1
  -3   7  -7 2684.34 3.93663  -2
  -8  -7   7 2684.34 3.93663   1
  -8  -7   6 0.45858 0.37202   1
   8   7  -5 1.83922 0.67809   1
   4   7   5 9.02099 0.55844  -2
   8  -7  -5 9.02099 0.55844   1
  -5   7  -4 17.9754 0.63360  -2
  -8  -7   4 17.9754 0.63360   1
   8  -7  -3 2.83633 0.65385   1
  -6   7  -3 3.69432 1.21669  -2
  -8  -7   3 3.69432 1.21669   1
   8  -7  -2 1.84532 0.47376   1
   8  -7  -1 1.44825 0.46904   1
   7  -7   1 991.236 2.56360  -2
   8   7  -1 991.236 2.56360   1
   8   7   0 6.76937 0.41000  -2
   8  -7   0 6.76937 0.41000   1
   8  -7   1 1.96663 0.72942   1
   9  -7  -1 1500.87 2.87867  -2
   8   7   1 1500.87 2.87867   1
  -8   7  -2 0.74391 0.45544   1
   8   7   3-0.35938 0.48397   1
  10   7  -3-2.08574 1.88198  -2
   8  -7   3-2.08574 1.88198   1
  11   7  -4 1136.90 2.68585  -2
   8  -7   4 1136.90 2.68585   1
   8   7   5 1.34746 0.82970   1
  12   7  -5 5.89320 0.78524  -2
   8  -7   5 5.89320 0.78524   1
   8  -7   6 0.42530 0.60589   1
   8  -7   7-2.11854 0.74317   1
  13   7  -7 4602.63 11.4948  -2
   8  -7   7 4602.63 11.4948   1
  14   7  -8 2.24873 0.78268  -2
   8  -7   8 2.24873 0.78268   1
 -15   7   9 3.81040 1.11353  -2
  -8  -7  -9 3.81040 1.11353   1
  -8  -7 -10-2.06574 1.25245   1
  -8  -7 -11 0.00391 1.54198   1
  16   7 -11-18.7804 2.78552  -2
   8  -7  11-18.7804 2.78552   1
  17   7 -12 1468.10 6.46594  -2
   8  -7  12 1468.10 6.46594   1
  18   7 -13 7.81300 1.69556  -2
   8  -7  13 7.81300 1.69556   1
  -8  -7 -14 1.21490 1.16229   1
  -8  -7 -15-2.61538 2.40113   1
  19  -7 -15 5539.94 11.7071  -2
   8   7  15 5539.94 11.7071   1
 -20   7  16-1.04419 1.39247  -2
  -8  -7 -16-1.04419 1.39247   1
  21  -7 -17 700.092 3.66803  -2
   8   7  17 700.092 3.66803   1
  -7   8  20 3634.80 13.1069  -2
   8  -8 -20 3634.80 13.1069   1
  -6   8  19 4252.74 10.4650  -2
   8  -8 -19 4252.74 10.4650   1
   8  -8 -18 5490.02 9.94314   1
  -5   8  17 5043.85 10.6786  -2
   8  -8 -17 5043.85 10.6786   1
  -4  -8  16 4823.86 11.9185  -2
   8   8 -16 4823.86 11.9185   1
  -8  -8  15 20724.9 22.0873   1
  -3   8  15 21182.8 30.5012  -2
   8  -8 -15 21182.8 30.5012   1
   8   8 -14 6498.56 9.82573   1
  -2   8  13 76.5166 1.85814  -2
   8  -8 -13 76.5166 1.85814   1
  -1   8  12 2427.68 7.59004  -2
   8  -8 -12 2427.68 7.59004   1
   8   8 -11 385.147 2.27417   1
   0   8  11 644.610 2.92720  -2
   8  -8 -11 644.610 2.92720   1
   8  -8 -10 2647.60 3.90691   1
   8   8  -9 7347.54 15.0882   1
   1   8   9 7742.53 6.66519  -2
   8  -8  -9 7742.53 6.66519   1
   2  -8   8 84.3812 0.97333  -2
   8   8  -8 84.3812 0.97333   1
  -8   8   7 22789.5 12.4722   1
   3   8   7 23388.3 13.9335  -2
   8  -8  -7 23388.3 13.9335   1
   8  -8  -6 505.403 1.44440   1
   8   8  -5 156.459 2.49176   1
  -4   8  -5 514.315 1.96144  -2
  -8  -8   5 514.315 1.96144   1
  -5  -8  -4 3934.31 5.60287  -2
  -8   8   4 3934.31 5.60287   1
   8  -8  -3 252.064 1.23313   1
  -6   8  -3 274.698 2.68855  -2
  -8  -8   3 274.698 2.68855   1
   8   8  -2 36956.1 13.1682   1
  -8  -8   1 574.484 2.23593   1
   7   8   1 554.306 2.23197  -2
   8  -8  -1 554.306 2.23197   1
  -8   8   0 3805.00 4.36185  -2
  -8  -8   0 3805.00 4.36185   1
  -8   8  -1 1236.37 3.25877   1
   9  -8  -1 1207.21 2.72300  -2
   8   8   1 1207.21 2.72300   1
   8   8   2 6186.36 4.78736   1
  -8  -8  -3 22334.5 9.89763   1
  10  -8  -3 26667.5 27.4056  -2
   8   8   3 26667.5 27.4056   1
 -11  -8   4 15682.4 10.8768  -2
  -8   8  -4 15682.4 10.8768   1
 -12   8   5 34124.9 12.6808  -2
  -8  -8  -5 34124.9 12.6808   1
   8   8   6 30991.7 13.0040   1
   8  -8   7 2575.82 4.23239   1
  13  -8  -7 2561.90 9.87153  -2
   8   8   7 2561.90 9.87153   1
  14   8  -8 668.618 3.43499  -2
   8  -8   8 668.618 3.43499   1
 -15   8   9 947.077 3.75191  -2
  -8  -8  -9 947.077 3.75191   1
  -8  -8 -10 6093.62 9.40876   1
  -8  -8 -11 8934.81 18.9038   1
  16   8 -11 9689.20 14.5058  -2
   8  -8  11 9689.20 14.5058   1
  17  -8 -12 1294.24 6.05329  -2
   8   8  12 1294.24 6.05329   1
  18  -8 -13 2994.44 7.26139  -2
   8   8  13 2994.44 7.26139   1
   8   8  14 9085.82 12.4875   1
  19  -8 -15 838.690 4.93492  -2
   8   8  15 838.690 4.93492   1
  20   8 -16 357.480 3.29848  -2
   8  -8  16 357.480 3.29848   1
   8   9 -19-12.1428 2.30352   1
  -6   9  19-11.7474 3.23980  -2
   8  -9 -19-11.7474 3.23980   1
   8   9 -18-11.2102 1.46199   1
  -6   9  18 24.2865 2.81130  -2
   8  -9 -18 24.2865 2.81130   1
  -5   9  17 42.7440 1.68581  -2
   8  -9 -17 42.7440 1.68581   1
  -4  -9  16 7.01935 1.46654  -2
   8   9 -16 7.01935 1.46654   1
   8   9 -15 3.94305 2.90633   1
   3   9 -15 5681.16 11.3430  -2
  -8  -9  15 5681.16 11.3430   1
   8  -9 -14 4.08606 1.18416   1
  -2   9  13 9.92376 1.27302  -2
   8  -9 -13 9.92376 1.27302   1
  -1  -9  12 701.196 4.44725  -2
   8   9 -12 701.196 4.44725   1
   8   9 -11 7.64222 2.48576   1
   0   9  11 1.13251 1.43279  -2
   8  -9 -11 1.13251 1.43279   1
   8  -9 -10 3.31113 0.69318   1
  -1  -9  -9 152.914 1.48731  -2
  -8   9   9 152.914 1.48731   1
  -2   9  -8 2.12839 0.74257  -2
  -8  -9   8 2.12839 0.74257   1
  -8   9   7 9.11869 0.86068   1
   3   9   7 97.4889 1.83240  -2
   8  -9  -7 97.4889 1.83240   1
   8  -9  -6-2.51066 0.58679   1
   8   9  -5 4.36001 1.13200   1
   4   9   5 1.46367 0.85058  -2
   8  -9  -5 1.46367 0.85058   1
  -5  -9  -4 236.955 1.63547  -2
  -8   9   4 236.955 1.63547   1
  -8  -9   3-2.99187 0.77143   1
   6   9   3 0.23247 1.02096  -2
   8  -9  -3 0.23247 1.02096   1
   8  -9  -2 3.87079 0.47458   1
  -8  -9   1-1.97693 0.55877   1
   7  -9   1 25.6653 1.79115  -2
   8   9  -1 25.6653 1.79115   1
   8  -9   0 4.60273 0.63899  -2
   8   9   0 4.60273 0.63899   1
   8  -9   1-0.89886 1.02248   1
  -9   9   1 726.290 2.26180  -2
  -8  -9  -1 726.290 2.26180   1
   8   9   2 1.57200 0.50320   1
   8   9   3-3.55468 0.62525   1
  10   9  -3 0.02715 1.97327  -2
   8  -9   3 0.02715 1.97327   1
  11   9  -4 1.42262 0.64957  -2
   8  -9   4 1.42262 0.64957   1
   8  -9   5 13.6841 1.11528   1
  12   9  -5 0.77288 1.00332  -2
   8  -9   5 0.77288 1.00332   1
  -8   9  -6 0.97658 0.68261   1
  -8  -9  -7-5.49923 1.57797   1
  13  -9  -7 808.694 6.01539  -2
   8   9   7 808.694 6.01539   1
  14   9  -8 2.07901 1.54270  -2
   8  -9   8 2.07901 1.54270   1
  15  -9  -9 352.080 3.48363  -2
   8   9   9 352.080 3.48363   1
   8   9  10 1.25780 1.25246   1
  -8  -9 -11 7.09476 1.89479   1
  16  -9 -11 5.17416 1.90406  -2
   8   9  11 5.17416 1.90406   1
 -17   9  12 153.416 3.02252  -2
  -8  -9 -12 153.416 3.02252   1
 -18   9  13 2.02893 1.44345  -2
  -8  -9 -13 2.02893 1.44345   1
   8   9  14-2.75209 1.03281   1
  19   9 -15 35.7301 1.94494  -2
   8  -9  15 35.7301 1.94494   1
   8  10 -18 4007.67 10.6100   1
  -6  10  18 4571.19 15.7460  -2
   8 -10 -18 4571.19 15.7460   1
   5  10 -17 131.075 2.23313  -2
  -8 -10  17 131.075 2.23313   1
  -4 -10  16 473.012 3.61697  -2
   8  10 -16 473.012 3.61697   1
  -3  10  15 198.333 4.19455  -2
   8 -10 -15 198.333 4.19455   1
  -8 -10  14 22520.7 22.9113   1
  -3  10  14 23509.1 33.1430  -2
   8 -10 -14 23509.1 33.1430   1
  -2  10  13 6767.27 10.3344  -2
   8 -10 -13 6767.27 10.3344   1
  -1 -10  12 266.046 2.98325  -2
   8  10 -12 266.046 2.98325   1
   8  10 -11 29683.4 36.8453   1
   0  10  11 34053.2 24.8800  -2
   8 -10 -11 34053.2 24.8800   1
   8 -10 -10 5832.10 10.5278   1
   1  10   9 749.109 4.51360  -2
   8 -10  -9 749.109 4.51360   1
   2  10   8 3745.06 11.4337  -2
   8 -10  -8 3745.06 11.4337   1
  -8 -10   7 450.491 4.71581   1
   3  10   7 494.185 4.44503  -2
   8 -10  -7 494.185 4.44503   1
   8 -10  -6 79.5151 0.99647   1
   8  10  -5 519.880 4.65487   1
  -4  10  -5 1621.20 4.17928  -2
  -8 -10   5 1621.20 4.17928   1
   5 -10   4 7922.63 10.7116  -2
   8  10  -4 7922.63 10.7116   1
   8  10  -3 20440.0 18.6950   1
  -6  10  -3 26020.4 26.7634  -2
  -8 -10   3 26020.4 26.7634   1
   8  10  -2 69864.5 27.3719   1
   8 -10  -1 3202.03 5.72676   1
  -7  10  -1 3133.31 8.82836  -2
  -8 -10   1 3133.31 8.82836   1
   8  10   0 25064.1 21.5965  -2
   8 -10   0 25064.1 21.5965   1
   8  10   1 6664.87 8.50513   1
   8 -10   2 3092.96 7.12069   1
  -8 -10  -3 3812.77 11.6417   1
  10  10  -3 4262.28 8.26417  -2
   8 -10   3 4262.28 8.26417   1
  11  10  -4 42.7593 1.35604  -2
   8 -10   4 42.7593 1.35604   1
  12  10  -5 1706.40 4.56487  -2
   8 -10   5 1706.40 4.56487   1
   8 -10   6 5627.46 8.67176   1
  -8 -10  -7 41630.5 38.7965   1
  13 -10  -7 41643.3 28.9461  -2
   8  10   7 41643.3 28.9461   1
  14  10  -8 1842.47 7.05776  -2
   8 -10   8 1842.47 7.05776   1
  -8 -10  -9 8433.88 18.7600   1
  15 -10  -9 8124.27 21.5049  -2
   8  10   9 8124.27 21.5049   1
   8 -10  10 21111.8 18.2740   1
  -8 -10 -11 878.839 6.45143   1
  16  10 -11 1271.50 5.82558  -2
   8 -10  11 1271.50 5.82558   1
  17  10 -12 41.6887 1.51909  -2
   8 -10  12 41.6887 1.51909   1
  18  10 -13 389.600 2.70516  -2
   8 -10  13 389.600 2.70516   1
   8 -10  14 511.550 3.01798   1
  -5  11  17 242.628 2.41034  -2
   8 -11 -17 242.628 2.41034   1
  -4  11  16 9.25614 1.86985  -2
   8 -11 -16 9.25614 1.86985   1
   8  11 -15 6.92061 2.30674   1
  -3  11  15 1368.42 8.74088  -2
   8 -11 -15 1368.42 8.74088   1
   8 -11 -14-0.20881 1.10103   1
   2  11 -13 9.58309 1.45038  -2
  -8 -11  13 9.58309 1.45038   1
  -1  11  12 8.00185 1.69741  -2
   8 -11 -12 8.00185 1.69741   1
   8  11 -11 11.9241 2.37342   1
   0  11  11 1.98210 2.16374  -2
   8 -11 -11 1.98210 2.16374   1
   8  11 -10 1.45841 1.53519   1
   1  11   9 2408.66 7.16993  -2
   8 -11  -9 2408.66 7.16993   1
  -2  11  -8 4.72939 1.60334  -2
  -8 -11   8 4.72939 1.60334   1
  -8 -11   7 10.7371 2.77764   1
   8 -11  -6-0.25095 1.16558   1
  -8 -11   5 5.78872 2.46479   1
  -5  11  -4 1.10860 2.70447  -2
  -8 -11   4 1.10860 2.70447   1
  -8 -11   3 4.20007 1.89545   1
  -8 -11   2-1.15754 1.92519   1
  -8 -11   1 10.2389 2.00787   1
  -8  11   0-4.18061 2.47092  -2
  -8 -11   0-4.18061 2.47092   1
   8 -11   1-1.16408 1.03470   1
   8 -11   2 0.88720 1.11808   1
   8 -11   3 5.34181 1.09320   1
  11  11  -4 105.304 1.54400  -2
   8 -11   4 105.304 1.54400   1
  -8 -11  -5-1.83335 2.00929   1
   8 -11   6 0.99542 0.93615   1
  -8 -11  -7 11.2589 1.94919   1
  13  11  -7 2256.96 6.96641  -2
   8 -11   7 2256.96 6.96641   1
  14  11  -8 17.3507 1.10073  -2
   8 -11   8 17.3507 1.10073   1
  -8 -11  -9 25.5149 1.57231   1
  15 -11  -9 22.1764 2.54751  -2
   8  11   9 22.1764 2.54751   1
   8 -11  10 4.63084 0.94649   1
  -8 -11 -11 8.11464 1.63409   1
  16  11 -11-5.05134 1.80893  -2
   8 -11  11-5.05134 1.80893   1
  17 -11 -12 339.318 3.22165  -2
   8  11  12 339.318 3.22165   1
  -8 -11 -13-2.87176 1.83350   1
  18  11 -13 13.2288 1.87593  -2
   8 -11  13 13.2288 1.87593   1
  -3  12  15 19082.6 31.9500  -2
   8 -12 -15 19082.6 31.9500   1
   8  12 -14 2517.23 11.9704   1
  -3  12  14 2465.18 11.3306  -2
   8 -12 -14 2465.18 11.3306   1
  -2  12  13 1786.21 7.29041  -2
   8 -12 -13 1786.21 7.29041   1
  -1  12  12 818.738 6.29198  -2
   8 -12 -12 818.738 6.29198   1
   8  12 -11 792.334 6.64640   1
   0  12  11 850.444 6.52628  -2
   8 -12 -11 850.444 6.52628   1
   8  12 -10 416.673 3.46815   1
   1  12   9 5136.79 15.9062  -2
   8 -12  -9 5136.79 15.9062   1
   2  12   8 68.2025 1.85273  -2
   8 -12  -8 68.2025 1.85273   1
  -8 -12   7 20590.6 30.3320   1
   3  12   7 20235.8 27.8012  -2
   8 -12  -7 20235.8 27.8012   1
  -8 -12   6 5772.16 16.0472   1
  -8 -12   5 199.704 3.89396   1
  -5  12  -4 2331.84 13.7599  -2
  -8 -12   4 2331.84 13.7599   1
  -8 -12   3 1092.54 6.88577   1
  -8 -12   2 5340.42 14.8387   1
  -8 -12   1 27.5483 2.17591   1
  -8  12   0 4732.37 18.4247  -2
  -8 -12   0 4732.37 18.4247   1
  -8 -12  -1 713.638 5.57275   1
  -8 -12  -2 12090.7 22.0470   1
  -8 -12  -3 21069.3 29.0220   1
 -11  12   4 6531.37 12.6964  -2
  -8 -12  -4 6531.37 12.6964   1
  -8 -12  -5 22257.5 30.4706   1
  12  12  -5 28199.5 32.4080  -2
   8 -12   5 28199.5 32.4080   1
   8  12   6 15824.5 15.3416   1
  -8 -12  -7 18.0876 1.73957   1
  13  12  -7 31.9615 1.50298  -2
   8 -12   7 31.9615 1.50298   1
  14 -12  -8 215.812 2.48061  -2
   8  12   8 215.812 2.48061   1
  -8 -12  -9 29.3956 1.63185   1
  15  12  -9 85.2647 1.94818  -2
   8 -12   9 85.2647 1.94818   1
   8  12  10 1815.06 5.47714   1
  16 -12 -11 9102.79 15.3827  -2
   8  12  11 9102.79 15.3827   1
  -2 -13  13 26.2257 1.94134  -2
   8  13 -13 26.2257 1.94134   1
  -1 -13  12 4.70241 2.86908  -2
   8  13 -12 4.70241 2.86908   1
   8  13 -11 1.63192 2.30780   1
   0  13  11 8.50231 2.88152  -2
   8 -13 -11 8.50231 2.88152   1
   8 -13 -10 2.75712 1.29114   1
   1 -13   9 736.810 6.59053  -2
   8  13  -9 736.810 6.59053   1
  -2  13  -8 8.23006 2.55210  -2
  -8 -13   8 8.23006 2.55210   1
  -8 -13   7-2.59733 2.04830   1
  -8 -13   6-1.45002 1.57061   1
  -4  13  -5-1.91790 2.74239  -2
  -8 -13   5-1.91790 2.74239   1
  -5  13  -4 74.8583 2.79490  -2
  -8 -13   4 74.8583 2.79490   1
  -8 -13   3-8.22773 2.23480   1
  -8 -13   2 1.95520 1.45239   1
  -8 -13   1 0.80712 1.65153   1
  -8  13   0 0.39491 2.27337  -2
  -8 -13   0 0.39491 2.27337   1
  -8 -13  -1 3.06021 1.72782   1
  -8 -13  -2-5.85594 1.67642   1
  -8 -13  -3 2.30080 1.67287   1
 -11  13   4 166.486 3.69042  -2
  -8 -13  -4 166.486 3.69042   1
  -8 -13  -5-14.4915 1.47946   1
  -8 -13  -6 0.82849 1.62475   1
   8 -13   7 15.3068 1.22741   1
 -14  13   8 4.93525 1.66590  -2
  -8 -13  -8 4.93525 1.66590   1
  -8 -13  -9-2.03248 1.73044   1
  15  13  -9 226.424 3.58832  -2
   8 -13   9 226.424 3.58832   1
   8  14 -10 3872.41 14.4928   1
   1 -14   9 1231.14 7.78408  -2
   8  14  -9 1231.14 7.78408   1
   2 -14   8 1509.50 11.3377  -2
   8  14  -8 1509.50 11.3377   1
  -8 -14   6 68.6728 2.25916   1
  -5  14  -4 1001.50 9.63803  -2
  -8 -14   4 1001.50 9.63803   1
  -8 -14   3 11995.4 23.8065   1
  -8 -14   2 35688.0 41.1751   1
  -8 -14   1 3084.47 11.9796   1
  -8  14   0 9646.06 20.0467  -2
  -8 -14   0 9646.06 20.0467   1
  -8 -14  -1 2343.81 10.2811   1
  -8 -14  -2 942.616 6.51313   1
  -8 -14  -3 1078.45 7.02410   1
 -11  14   4 78.6312 2.48815  -2
  -8 -14  -4 78.6312 2.48815   1
  -8 -14  -5 595.368 5.16145   1
  -8 -14  -6 3416.62 12.2188   1
  -8 -15   3 6.07049 2.05634   1
  -8 -15   2 32.1684 2.00039   1
  -8 -15   1 10.0694 2.03276   1
  -8  15   0 28.8499 2.47669  -2
  -8 -15   0 28.8499 2.47669   1
  -8 -15  -1 12.1762 1.54733   1
  -9   0  24 19.4693 2.80402  -2
   9   0 -24 19.4693 2.80402   1
   9   0 -23 2.76750 2.14191   1
   9   0 -22-11.6827 1.96514   1
  -6   0  20 198.696 4.28451  -2
   9   0 -20 198.696 4.28451   1
  -9   0  19 9.65798 1.06755   1
  -9   0  18-5.52081 1.06890   1
  -4   0  17 127.834 1.39195  -2
   9   0 -17 127.834 1.39195   1
  -3   0  16-4.37985 1.20344  -2
   9   0 -16-4.37985 1.20344   1
  -9   0  15 3.93609 0.70495   1
   9   0 -14 1.71325 0.53524   1
   1   0 -13 0.63166 0.63622  -2
  -9   0  13 0.63166 0.63622   1
   0   0  12 303.175 1.70726  -2
   9   0 -12 303.175 1.70726   1
   9   0 -11-1.53369 0.39424   1
   9   0 -10 0.98113 0.37886   1
   9   0  -9-1.00272 0.50525   1
   2   0   9 220.252 1.19713  -2
   9   0  -9 220.252 1.19713   1
  -3   0  -8 1.00376 0.55595  -2
  -9   0   8 1.00376 0.55595   1
  -9   0   7 0.54461 0.41896   1
   9   0  -6 4.21227 0.41987   1
  -9   0   5-0.90020 0.58432   1
   5   0   5 2.66145 0.70202  -2
   9   0  -5 2.66145 0.70202   1
  -6   0  -4 8093.36 5.57931  -2
  -9   0   4 8093.36 5.57931   1
   9   0  -3-2.17611 0.99816   1
   7   0   3-0.47539 0.50421  -2
   9   0  -3-0.47539 0.50421   1
  -9   0   2-0.88501 0.49813   1
  -9   0   1 98.9956 1.60155   1
  -8   0  -1 7742.47 4.52168  -2
  -9   0   1 7742.47 4.52168   1
  -9   0   0 3.94114 0.41310  -2
  -9   0   0 3.94114 0.41310   1
   9   0   1 3.59040 0.59684   1
  10   0  -1 702.997 1.82054  -2
   9   0   1 702.997 1.82054   1
   9   0   2 0.45446 0.38277   1
   9   0   3 1.54227 0.36966   1
  12   0  -4 90.9220 1.01643  -2
   9   0   4 90.9220 1.01643   1
  -9   0  -5-0.03017 0.54768   1
  13   0  -5 3.02529 0.69888  -2
   9   0   5 3.02529 0.69888   1
   9   0   6-0.34516 0.37889   1
   9   0   7 2.65155 0.43051   1
  15   0  -8 3.69674 0.59176  -2
   9   0   8 3.69674 0.59176   1
  16   0  -9 509.224 1.66858  -2
   9   0   9 509.224 1.66858   1
  -9   0 -10-0.88409 0.59439   1
   9   0  11-2.87969 0.78236   1
  17   0 -11 15.1338 1.61203  -2
   9   0  11 15.1338 1.61203   1
  18   0 -12 779.708 3.47887  -2
   9   0  12 779.708 3.47887   1
  19   0 -13 7.88958 1.16088  -2
   9   0  13 7.88958 1.16088   1
  -9   0 -14 2.30215 1.76287   1
  -9   0 -15-2.86594 1.85930   1
 -21   0  16 10.4812 2.29174  -2
  -9   0 -16 10.4812 2.29174   1
 -22   0  17 4.28095 2.26802  -2
  -9   0 -17 4.28095 2.26802   1
  -9   0 -18 11.1948 1.95185   1
  -9   0 -19 11.9187 1.73002   1
  -9  -1  24 79.2701 2.63622  -2
   9   1 -24 79.2701 2.63622   1
   9   1 -22 6124.55 10.0372   1
  -7   1  21 2208.49 6.03191  -2
   9  -1 -21 2208.49 6.03191   1
  -6  -1  20 29540.4 26.6162  -2
   9   1 -20 29540.4 26.6162   1
  -9   1  19 3124.69 5.72681   1
   9   1 -18 70.8459 1.08376   1
   4  -1 -17 14497.7 8.55039  -2
  -9   1  17 14497.7 8.55039   1
  -3   1  16 1387.29 3.26740  -2
   9  -1 -16 1387.29 3.26740   1
   9  -1 -15 68732.8 15.4566   1
   9  -1 -14 1477.22 2.24129   1
  -1   1  13 626.595 1.39859  -2
   9  -1 -13 626.595 1.39859   1
   0   1  12 194.911 1.00389  -2
   9  -1 -12 194.911 1.00389   1
   9  -1 -11 1417.75 1.66062   1
   9  -1 -10 29541.9 6.51579   1
   9  -1  -9 5546.81 4.19340   1
  -2  -1  -9 5529.08 3.35459  -2
  -9   1   9 5529.08 3.35459   1
  -3   1  -8 13074.0 5.67160  -2
  -9  -1   8 13074.0 5.67160   1
  -9  -1   7 905.582 1.13575   1
  -9  -1   6 272.237 0.68072   1
   9  -1  -5 6314.83 3.93458   1
   5   1   5 5955.59 4.44383  -2
   9  -1  -5 5955.59 4.44383   1
  -6   1  -4 11862.2 5.16827  -2
  -9  -1   4 11862.2 5.16827   1
   9   1  -3 8454.00 4.51968   1
  -7  -1  -3 8805.97 4.50706  -2
  -9   1   3 8805.97 4.50706   1
   9   1  -2 468.856 0.84192   1
   9   1  -1 2321.29 3.96569   1
   8   1   1 2336.17 1.91498  -2
   9  -1  -1 2336.17 1.91498   1
   9   1   0 32002.5 7.18316  -2
   9  -1   0 32002.5 7.18316   1
  -9   1  -1 39.9049 0.48350   1
 -10   1   1 62.1065 0.78654  -2
  -9  -1  -1 62.1065 0.78654   1
  -9   1  -2 49.5381 0.94210   1
   9  -1   3 2987.49 2.04150   1
  11   1  -3 3842.75 8.00342  -2
   9  -1   3 3842.75 8.00342   1
  12  -1  -4 3645.26 2.56853  -2
   9   1   4 3645.26 2.56853   1
   9  -1   5 30733.7 8.01586   1
  13  -1  -5 36027.8 10.6472  -2
   9   1   5 36027.8 10.6472   1
  -9   1  -6 10812.5 4.33624   1
   9  -1   7 831.942 1.39620   1
  15   1  -8 383.813 1.50372  -2
   9  -1   8 383.813 1.50372   1
  -9   1  -9 504.943 3.87369   1
 -16  -1   9 480.052 1.34164  -2
  -9   1  -9 480.052 1.34164   1
  -9   1 -10 37645.4 11.1020   1
  -9   1 -11 7881.29 5.64923   1
  17   1 -11 11775.1 17.6380  -2
   9  -1  11 11775.1 17.6380   1
 -18  -1  12 11748.6 9.10333  -2
  -9   1 -12 11748.6 9.10333   1
  -9   1 -13 100.680 1.88986   1
 -19  -1  13 101.759 1.66168  -2
  -9   1 -13 101.759 1.66168   1
  -9   1 -14 1000.70 3.84205   1
  -9   1 -15 11086.9 15.8443   1
 -21  -1  16 6096.64 20.6095  -2
  -9   1 -16 6096.64 20.6095   1
 -22   1  17 4663.96 10.8276  -2
  -9  -1 -17 4663.96 10.8276   1
  -9   1 -18 3869.37 10.2355   1
  -9  -1 -19 2959.15 12.7914   1
  -9  -2  24 16.1283 1.93364  -2
   9   2 -24 16.1283 1.93364   1
   9   2 -23-7.57785 1.29657   1
   9   2 -22 4.58681 1.30728   1
  -7  -2  21 5.63123 2.27581  -2
   9   2 -21 5.63123 2.27581   1
  -6  -2  20 2592.68 10.1482  -2
   9   2 -20 2592.68 10.1482   1
   9   2 -19 3.98733 1.06589   1
   9  -2 -18 0.91845 0.83578   1
  -4   2  17 2514.79 3.91730  -2
   9  -2 -17 2514.79 3.91730   1
   3  -2 -16 0.35936 0.55423  -2
  -9   2  16 0.35936 0.55423   1
   9   2 -15 0.89103 0.48480   1
  -2   2  15 2583.32 8.32414  -2
   9  -2 -15 2583.32 8.32414   1
   9   2 -14 0.68758 0.40595   1
  -1  -2  13 3.07938 0.49660  -2
   9   2 -13 3.07938 0.49660   1
   0   2 -12 1816.69 2.79671  -2
  -9  -2  12 1816.69 2.79671   1
   9   2 -11 0.82630 0.33513   1
   9  -2 -10-1.49683 0.35992   1
   9   2  -9 2.34055 0.52216   1
  -2  -2  -9 24224.1 8.55869  -2
  -9   2   9 24224.1 8.55869   1
  -3  -2  -8 3.65184 0.33767  -2
  -9   2   8 3.65184 0.33767   1
  -9   2   7 1.24109 0.27725   1
  -9   2   6 1.32322 0.26473   1
  -9  -2   5-0.49958 0.35123   1
   5   2   5 3.25707 0.45960  -2
   9  -2  -5 3.25707 0.45960   1
  -6   2  -4 372.822 0.85389  -2
  -9  -2   4 372.822 0.85389   1
   9   2  -3-0.35465 0.23406   1
   7   2   3 0.21808 0.58914  -2
   9  -2  -3 0.21808 0.58914   1
  -9   2   2-0.21519 0.21023   1
   9   2  -1 0.90277 0.44772   1
   8  -2   1 157.454 0.64145  -2
   9   2  -1 157.454 0.64145   1
   9   2   0 1.58133 0.31940  -2
   9  -2   0 1.58133 0.31940   1
   9  -2   1 0.57774 0.35842   1
 -10   2   1 281.621 0.97607  -2
  -9  -2  -1 281.621 0.97607   1
   9  -2   2-0.08354 0.27610   1
  -9   2  -3-0.19517 0.35668   1
  11   2  -3-0.92257 0.41615  -2
   9  -2   3-0.92257 0.41615   1
 -12   2   4 5.01303 0.40102  -2
  -9  -2  -4 5.01303 0.40102   1
   9   2   5 1.47601 0.49756   1
 -13   2   5-0.10847 0.69921  -2
  -9  -2  -5-0.10847 0.69921   1
   9  -2   6 0.33767 0.36425   1
  -9   2  -7 2.43113 0.40544   1
  14   2  -7 252.243 2.47869  -2
   9  -2   7 252.243 2.47869   1
 -15  -2   8 2.43195 0.54084  -2
  -9   2  -8 2.43195 0.54084   1
  -9   2  -9 4.48527 1.45961   1
 -16   2   9 508.299 1.37643  -2
  -9  -2  -9 508.299 1.37643   1
   9   2  10-2.32216 0.44330   1
   9  -2  11 2.04052 0.58198   1
 -17  -2  11 4.41889 0.96025  -2
  -9   2 -11 4.41889 0.96025   1
 -18  -2  12 49.1392 0.82307  -2
  -9   2 -12 49.1392 0.82307   1
  19   2 -13 0.47495 0.96098  -2
   9  -2  13 0.47495 0.96098   1
   9  -2  14 3.57244 0.84151   1
  -9   2 -15-9.01924 1.11398   1
  20  -2 -15 23.6369 2.16690  -2
   9   2  15 23.6369 2.16690   1
 -21   2  16 10.4204 1.35407  -2
  -9  -2 -16 10.4204 1.35407   1
 -22  -2  17 436.306 3.40984  -2
  -9   2 -17 436.306 3.40984   1
  -9   2 -18 0.24745 1.46444   1
  -9  -2 -19-3.12592 2.20213   1
   9   3 -23 544.806 3.83710   1
   9   3 -22 3451.43 9.54645   1
   7   3 -21 16446.0 21.0053  -2
  -9  -3  21 16446.0 21.0053   1
  -6  -3  20 13835.9 24.1259  -2
   9   3 -20 13835.9 24.1259   1
  -9  -3  19 95.9774 1.97851   1
  -5   3  19 199.560 2.76906  -2
   9  -3 -19 199.560 2.76906   1
  -9  -3  18 19528.4 16.4138   1
  -4   3  17 20567.0 14.3397  -2
   9  -3 -17 20567.0 14.3397   1
  -3   3  16 8095.81 10.0765  -2
   9  -3 -16 8095.81 10.0765   1
  -9   3  15 51014.3 17.2476   1
  -2   3  15 49716.3 25.0792  -2
   9  -3 -15 49716.3 25.0792   1
   9   3 -14 10757.0 6.04104   1
   1  -3 -13 8331.79 5.26644  -2
  -9   3  13 8331.79 5.26644   1
   0   3  12 2197.10 3.34481  -2
   9  -3 -12 2197.10 3.34481   1
   9   3 -11 17.0610 0.44267   1
   9   3 -10 94959.9 15.2136   1
   2   3   9 1386.09 1.84966  -2
   9  -3  -9 1386.09 1.84966   1
  -3  -3  -8 19373.4 8.30648  -2
  -9   3   8 19373.4 8.30648   1
   9  -3  -7 4317.77 2.46199   1
   9  -3  -6 16378.8 4.69533   1
   9  -3  -5 48711.7 10.2147   1
   5  -3   5 65136.4 13.5281  -2
   9   3  -5 65136.4 13.5281   1
   6   3   4 5701.45 3.33530  -2
   9  -3  -4 5701.45 3.33530   1
  -9   3   3 8232.36 3.55457   1
  -7   3  -3 8692.07 6.16142  -2
  -9  -3   3 8692.07 6.16142   1
  -9   3   2 7939.62 3.07217   1
   9  -3  -1 8864.25 4.71190   1
   8   3   1 8603.70 4.25069  -2
   9  -3  -1 8603.70 4.25069   1
   9  -3   0 13891.6 4.66698  -2
   9   3   0 13891.6 4.66698   1
  -9   3  -1 7136.13 3.39567   1
 -10   3   1 7334.59 5.97529  -2
  -9  -3  -1 7334.59 5.97529   1
   9  -3   2 23568.9 6.55506   1
   9  -3   3 6964.13 3.94575   1
  11   3  -3 7480.24 11.1728  -2
   9  -3   3 7480.24 11.1728   1
 -12  -3   4 9230.89 5.00296  -2
  -9   3  -4 9230.89 5.00296   1
   9   3   5 45582.2 12.2400   1
 -13   3   5 52401.7 15.6439  -2
  -9  -3  -5 52401.7 15.6439   1
  -9   3  -6 52438.8 10.6907   1
   9   3   7 5684.30 3.70358   1
  15   3  -8 5186.16 5.42878  -2
   9  -3   8 5186.16 5.42878   1
  -9   3  -9 2491.79 8.62293   1
  16   3  -9 2406.58 3.09818  -2
   9  -3   9 2406.58 3.09818   1
   9   3  10 74006.7 17.0681   1
   9  -3  11 1273.09 2.60026   1
  18  -3 -12 7325.42 9.55193  -2
   9   3  12 7325.42 9.55193   1
  19  -3 -13 9543.92 9.80047  -2
   9   3  13 9543.92 9.80047   1
  -9   3 -14 5414.49 7.55512   1
  -9   3 -15 21.0694 1.37818   1
  20   3 -15 50.3060 1.33405  -2
   9  -3  15 50.3060 1.33405   1
  21   3 -16 23077.0 20.7374  -2
   9  -3  16 23077.0 20.7374   1
  22  -3 -17 11349.0 14.2109  -2
   9   3  17 11349.0 14.2109   1
  -9  -3 -18 45.1825 1.22430   1
  -9  -3 -19 78.7811 1.52924   1
  -9  -4  23 3.94321 1.44207   1
   9   4 -22-4.48721 1.22224   1
  -7  -4  21-18.7856 2.57441  -2
   9   4 -21-18.7856 2.57441   1
   6   4 -20 438.166 3.69958  -2
  -9  -4  20 438.166 3.69958   1
   9   4 -19 1.05715 2.63632   1
  -5   4  19-0.40468 1.87328  -2
   9  -4 -19-0.40468 1.87328   1
   9   4 -18 7.20785 1.20702   1
  -4  -4  17 78.6652 1.71168  -2
   9   4 -17 78.6652 1.71168   1
  -3   4  16 0.89361 1.15762  -2
   9  -4 -16 0.89361 1.15762   1
   9   4 -15 5.39204 0.85257   1
  -2   4  15 6586.11 9.75422  -2
   9  -4 -15 6586.11 9.75422   1
   9  -4 -14 2.63607 0.55195   1
   1  -4 -13 3.77507 0.62460  -2
  -9   4  13 3.77507 0.62460   1
   0  -4 -12 12.8771 0.66246  -2
  -9   4  12 12.8771 0.66246   1
   9   4 -11 1.26727 0.42881   1
   9   4 -10 0.26581 0.45744   1
   9  -4  -9-7.59812 0.73415   1
  -2  -4  -9 963.831 1.94041  -2
  -9   4   9 963.831 1.94041   1
   3   4   8 2.91909 0.50508  -2
   9  -4  -8 2.91909 0.50508   1
   9  -4  -7 0.15798 0.43412   1
   4   4   7 92.0300 2.16093  -2
   9  -4  -7 92.0300 2.16093   1
  -9   4   6 1.23010 0.39988   1
  -9   4   5 0.47908 0.46261   1
  -5  -4  -5-1.68659 0.64185  -2
  -9   4   5-1.68659 0.64185   1
   6   4   4 2990.97 2.86429  -2
   9  -4  -4 2990.97 2.86429   1
   9  -4  -3 1.26433 0.30047   1
  -7   4  -3-0.97401 0.75240  -2
  -9  -4   3-0.97401 0.75240   1
   9  -4  -2 0.69307 0.30651   1
   9   4  -1 3.28938 0.20861   1
   8   4   1 2867.73 3.30871  -2
   9  -4  -1 2867.73 3.30871   1
  -9  -4   0 2.15314 0.23593  -2
  -9   4   0 2.15314 0.23593   1
  -9   4  -1 1.99238 0.33527   1
  10   4  -1 70.4819 1.02256  -2
   9  -4   1 70.4819 1.02256   1
  -9   4  -2 0.53621 0.30684   1
   9  -4   3-1.39898 0.41027   1
 -11   4   3-0.17714 0.87396  -2
  -9  -4  -3-0.17714 0.87396   1
  12   4  -4 64.4377 0.66582  -2
   9  -4   4 64.4377 0.66582   1
  -9   4  -5 2.73404 0.51778   1
  13   4  -5 4.79918 0.61901  -2
   9  -4   5 4.79918 0.61901   1
  -9  -4  -6 1.58561 0.36894   1
   9  -4   7-0.24322 0.42077   1
  15   4  -8 0.06533 0.47090  -2
   9  -4   8 0.06533 0.47090   1
  -9   4  -9 3.95068 1.56212   1
  16  -4  -9 711.328 1.79364  -2
   9   4   9 711.328 1.79364   1
   9  -4  10 6.57564 0.57369   1
  -9   4 -11-1.17698 0.72738   1
  17  -4 -11-1.47615 1.16566  -2
   9   4  11-1.47615 1.16566   1
  18  -4 -12 1231.98 4.08361  -2
   9   4  12 1231.98 4.08361   1
 -19  -4  13 5.21002 1.18944  -2
  -9   4 -13 5.21002 1.18944   1
  -9   4 -14 0.02140 0.82754   1
   9   4  15 1.88751 0.87443   1
 -21   4  16-0.41727 1.27209  -2
  -9  -4 -16-0.41727 1.27209   1
  22  -4 -17 5.32258 1.20588  -2
   9   4  17 5.32258 1.20588   1
  -9   4 -18 14.3507 1.38223   1
  -9  -4 -19 4.26297 1.87231   1
   9   5 -22 7990.84 15.0183   1
  -7   5  21 1217.15 5.47398  -2
   9  -5 -21 1217.15 5.47398   1
  -6   5  20 36555.7 39.5807  -2
   9  -5 -20 36555.7 39.5807   1
  -9  -5  19 9373.95 15.6579   1
  -5   5  19 9747.83 20.3170  -2
   9  -5 -19 9747.83 20.3170   1
  -9  -5  18 8631.66 11.7476   1
  -4   5  17 8888.38 11.6591  -2
   9  -5 -17 8888.38 11.6591   1
  -3  -5  16 1986.09 7.03383  -2
   9   5 -16 1986.09 7.03383   1
   9   5 -15 58704.7 34.0603   1
  -2   5  15 57740.6 30.1922  -2
   9  -5 -15 57740.6 30.1922   1
  -9  -5  14 79.9396 0.84551   1
  -1  -5  13 10197.6 6.70308  -2
   9   5 -13 10197.6 6.70308   1
   0  -5  12 537.955 2.18605  -2
   9   5 -12 537.955 2.18605   1
   9   5 -11 3647.87 3.59721   1
   9   5 -10 710.639 1.71104   1
  -9  -5   9 5387.75 7.66872   1
  -2  -5  -9 5086.14 4.42385  -2
  -9   5   9 5086.14 4.42385   1
  -3  -5  -8 6666.21 5.82420  -2
  -9   5   8 6666.21 5.82420   1
  -9   5   7 4754.81 3.84269   1
   4   5   7 4699.40 9.26255  -2
   9  -5  -7 4699.40 9.26255   1
   9  -5  -6 12803.2 5.64333   1
  -9   5   5 64851.7 34.1966   1
   5   5   5 74702.6 13.4610  -2
   9  -5  -5 74702.6 13.4610   1
  -6  -5  -4 11052.7 5.55360  -2
  -9   5   4 11052.7 5.55360   1
  -9   5   3 35159.0 8.07404   1
   7   5   3 37479.5 18.5120  -2
   9  -5  -3 37479.5 18.5120   1
  -9  -5   2 7125.56 3.55054   1
  -9  -5   1 15767.1 7.45234   1
   8  -5   1 15255.4 9.40210  -2
   9   5  -1 15255.4 9.40210   1
   9   5   0 90447.0 19.2438  -2
   9  -5   0 90447.0 19.2438   1
   9   5   1 3037.29 3.89888   1
 -10   5   1 2899.67 3.60702  -2
  -9  -5  -1 2899.67 3.60702   1
   9  -5   2 10166.5 5.07454   1
   9  -5   3 351.782 1.14397   1
 -11   5   3 736.627 3.82047  -2
  -9  -5  -3 736.627 3.82047   1
  12   5  -4 1393.74 2.64899  -2
   9  -5   4 1393.74 2.64899   1
   9   5   5 11612.9 10.0316   1
  13   5  -5 14706.7 8.88751  -2
   9  -5   5 14706.7 8.88751   1
  -9   5  -6 145.827 0.91041   1
  -9   5  -7 244.113 1.12321   1
  15   5  -8 4188.72 5.59555  -2
   9  -5   8 4188.72 5.59555   1
  16   5  -9 201.765 1.31945  -2
   9  -5   9 201.765 1.31945   1
   9  -5  10 10077.9 7.13014   1
   9  -5  11 24095.3 14.4647   1
  17  -5 -11 35085.0 37.9124  -2
   9   5  11 35085.0 37.9124   1
  18   5 -12 11493.3 13.9470  -2
   9  -5  12 11493.3 13.9470   1
 -19  -5  13 6110.09 8.20145  -2
  -9   5 -13 6110.09 8.20145   1
  -9   5 -14 32.2646 0.95518   1
   9  -5  15 30902.8 26.0386   1
  20  -5 -15 34472.7 42.3631  -2
   9   5  15 34472.7 42.3631   1
 -21   5  16 609.700 7.43726  -2
  -9  -5 -16 609.700 7.43726   1
  22   5 -17 1403.75 4.33138  -2
   9  -5  17 1403.75 4.33138   1
   9  -5  18 11016.1 11.9874   1
   9   6 -22 9.18531 1.47274   1
  -7   6  21 14.5843 1.52511  -2
   9  -6 -21 14.5843 1.52511   1
   6   6 -20 964.513 6.67740  -2
  -9  -6  20 964.513 6.67740   1
   9   6 -19-25.4454 2.26664   1
  -5   6  19 2.79624 2.31694  -2
   9  -6 -19 2.79624 2.31694   1
   9   6 -18 5.88138 1.44571   1
  -5   6  18 7.09600 2.64276  -2
   9  -6 -18 7.09600 2.64276   1
  -4  -6  17 128.927 2.15183  -2
   9   6 -17 128.927 2.15183   1
  -3   6  16 0.43027 1.60244  -2
   9  -6 -16 0.43027 1.60244   1
   9   6 -15 7.30261 2.77715   1
  -2   6  15 6213.49 10.9903  -2
   9  -6 -15 6213.49 10.9903   1
  -9  -6  14 5.71778 0.89545   1
  -1  -6  13 2.53832 0.75466  -2
   9   6 -13 2.53832 0.75466   1
   0   6  12 3135.99 5.14196  -2
   9  -6 -12 3135.99 5.14196   1
  -9   6  11 0.75887 0.63856   1
  -1   6 -11 19.2801 1.63409  -2
  -9  -6  11 19.2801 1.63409   1
   9  -6 -10 0.80750 0.56961   1
   9   6  -9 7.84267 1.11551   1
   2   6   9 8426.05 5.90048  -2
   9  -6  -9 8426.05 5.90048   1
  -3   6  -8 1.33315 0.51613  -2
  -9  -6   8 1.33315 0.51613   1
   9   6  -7-5.25704 0.61038   1
  -4   6  -7 814.670 2.22521  -2
  -9  -6   7 814.670 2.22521   1
   9   6  -6 0.50552 0.39283   1
   9   6  -5 5.13828 0.77544   1
  -5  -6  -5 1.56731 0.56428  -2
  -9   6   5 1.56731 0.56428   1
   6   6   4 1916.65 3.12499  -2
   9  -6  -4 1916.65 3.12499   1
   9  -6  -3-0.41427 0.44264   1
  -7  -6  -3 0.06315 0.55317  -2
  -9   6   3 0.06315 0.55317   1
   9  -6  -2 2.75885 0.36959   1
   9  -6  -1 1.14989 0.57502   1
   8   6   1 1115.34 2.15550  -2
   9  -6  -1 1115.34 2.15550   1
   9   6   0 2.17641 0.43951  -2
   9  -6   0 2.17641 0.43951   1
   9  -6   1 2.05788 0.52044   1
  10  -6  -1 997.058 2.76836  -2
   9   6   1 997.058 2.76836   1
  -9   6  -2 0.02177 0.38694   1
   9  -6   3 0.53613 0.50851   1
 -12  -6   4 2.84579 0.58362  -2
  -9   6  -4 2.84579 0.58362   1
  -9   6  -5 2.73158 1.42894   1
  13  -6  -5 3.32299 0.71173  -2
   9   6   5 3.32299 0.71173   1
  -9   6  -6-1.95938 0.49772   1
   9  -6   7 6.79048 0.74019   1
  14  -6  -7 3145.90 10.3955  -2
   9   6   7 3145.90 10.3955   1
 -15  -6   8-0.03718 0.83134  -2
  -9   6  -8-0.03718 0.83134   1
 -16   6   9 752.941 2.24175  -2
  -9  -6  -9 752.941 2.24175   1
   9   6  10 1.42977 0.91441   1
  -9  -6 -11 0.85584 2.18834   1
  17   6 -11 8.35625 1.98611  -2
   9  -6  11 8.35625 1.98611   1
 -18   6  12 106.114 2.23431  -2
  -9  -6 -12 106.114 2.23431   1
  19   6 -13 9.53976 1.49217  -2
   9  -6  13 9.53976 1.49217   1
   9  -6  14-11.6651 1.05157   1
   9  -6  15 1.15877 1.08035   1
  21   6 -16 21.8924 1.43380  -2
   9  -6  16 21.8924 1.43380   1
  22   6 -17 455.855 3.51638  -2
   9  -6  17 455.855 3.51638   1
   9   6  18-3.00605 1.47188   1
   7   7 -21 19126.6 25.7446  -2
  -9  -7  21 19126.6 25.7446   1
  -6   7  20 8772.86 16.5931  -2
   9  -7 -20 8772.86 16.5931   1
   9   7 -19 458.225 5.55748   1
  -5   7  19 502.221 3.82144  -2
   9  -7 -19 502.221 3.82144   1
   9   7 -18 29073.7 22.2610   1
  -4  -7  17 14809.5 16.5469  -2
   9   7 -17 14809.5 16.5469   1
   3   7 -16 7681.17 14.4008  -2
  -9  -7  16 7681.17 14.4008   1
   9   7 -15 34124.5 39.2674   1
  -2   7  15 32702.6 25.3360  -2
   9  -7 -15 32702.6 25.3360   1
  -9  -7  14 8310.79 13.2266   1
  -2   7  14 7890.27 17.5976  -2
   9  -7 -14 7890.27 17.5976   1
  -1   7  13 11963.7 12.7630  -2
   9  -7 -13 11963.7 12.7630   1
   0  -7  12 79.0452 0.99936  -2
   9   7 -12 79.0452 0.99936   1
   9   7 -11 519.206 2.23195   1
   1   7  11 627.268 2.74928  -2
   9  -7 -11 627.268 2.74928   1
  -9   7  10 86017.5 19.4108   1
   9   7  -9 1729.80 7.35079   1
   2   7   9 1821.06 2.94292  -2
   9  -7  -9 1821.06 2.94292   1
   3   7   8 11365.5 8.86207  -2
   9  -7  -8 11365.5 8.86207   1
   9  -7  -7 1908.69 2.94734   1
   4   7   7 1881.34 4.46347  -2
   9  -7  -7 1881.34 4.46347   1
  -9   7   6 19582.0 7.63182   1
   9   7  -5 64427.2 22.4925   1
  -5  -7  -5 77360.3 17.4455  -2
  -9   7   5 77360.3 17.4455   1
   6   7   4 1526.10 3.72211  -2
   9  -7  -4 1526.10 3.72211   1
   9  -7  -3 11682.5 11.5739   1
  -7   7  -3 12048.0 9.09949  -2
  -9  -7   3 12048.0 9.09949   1
   9   7  -2 6527.57 4.61028   1
  -9  -7   1 8075.30 7.45169   1
   8  -7   1 8004.61 5.75698  -2
   9   7  -1 8004.61 5.75698   1
  -9  -7   0 27971.5 10.8235  -2
  -9   7   0 27971.5 10.8235   1
   9  -7   1 4348.89 5.77652   1
  10  -7  -1 4249.87 4.96835  -2
   9   7   1 4249.87 4.96835   1
   9  -7   2 23169.4 9.05881   1
   9   7   3 6876.13 5.51636   1
  11   7  -3 7130.03 12.9872  -2
   9  -7   3 7130.03 12.9872   1
 -12   7   4 2694.35 4.74442  -2
  -9  -7  -4 2694.35 4.74442   1
  13   7  -5 36191.6 11.6905  -2
   9  -7   5 36191.6 11.6905   1
   9   7   6 32754.6 13.2054   1
  -9   7  -7 4040.71 5.84851   1
  14   7  -7 3952.04 8.22433  -2
   9  -7   7 3952.04 8.22433   1
  15   7  -8 4214.34 6.68066  -2
   9  -7   8 4214.34 6.68066   1
 -16   7   9 4096.41 7.18943  -2
  -9  -7  -9 4096.41 7.18943   1
   9  -7  10 59594.0 28.4753   1
   9  -7  11 2342.40 7.09032   1
  17  -7 -11 1852.61 9.91040  -2
   9   7  11 1852.61 9.91040   1
  18   7 -12 4420.48 10.9873  -2
   9  -7  12 4420.48 10.9873   1
 -19   7  13 13522.6 14.9254  -2
  -9  -7 -13 13522.6 14.9254   1
   9  -7  14 7691.38 11.5430   1
  -9  -7 -15 1234.78 6.01867   1
  20   7 -15 1186.44 7.40626  -2
   9  -7  15 1186.44 7.40626   1
 -21   7  16 24342.7 26.4557  -2
  -9  -7 -16 24342.7 26.4557   1
  22  -7 -17 10260.9 16.8387  -2
   9   7  17 10260.9 16.8387   1
  -6   8  20 1262.52 11.5984  -2
   9  -8 -20 1262.52 11.5984   1
   9   8 -19 4.02849 1.27178   1
  -5   8  19-6.61690 2.81748  -2
   9  -8 -19-6.61690 2.81748   1
   9  -8 -18-0.51368 1.10766   1
   4   8 -17 1869.53 5.88319  -2
  -9  -8  17 1869.53 5.88319   1
   3   8 -16 16.4198 1.60330  -2
  -9  -8  16 16.4198 1.60330   1
  -9  -8  15 4.49682 1.51395   1
  -2   8  15 658.408 5.87806  -2
   9  -8 -15 658.408 5.87806   1
   9  -8 -14-0.83541 1.34962   1
  -1   8  13 9.71723 1.61401  -2
   9  -8 -13 9.71723 1.61401   1
   0   8  12 236.424 2.78651  -2
   9  -8 -12 236.424 2.78651   1
  -9   8  11-1.60948 0.80254   1
   1   8  11-0.26091 1.54489  -2
   9  -8 -11-0.26091 1.54489   1
  -9   8  10-1.84482 0.54111   1
   9   8  -9 2.64098 1.65019   1
  -2  -8  -9 2562.01 3.65870  -2
  -9   8   9 2562.01 3.65870   1
  -3   8  -8-0.60134 0.60462  -2
  -9  -8   8-0.60134 0.60462   1
  -9   8   7-2.35768 0.84800   1
   4   8   7 7.47954 1.02307  -2
   9  -8  -7 7.47954 1.02307   1
   9   8  -6-1.40836 0.62883   1
   9   8  -5-10.6869 0.69356   1
  -5   8  -5-0.96332 0.84653  -2
  -9  -8   5-0.96332 0.84653   1
   6   8   4 223.667 1.62993  -2
   9  -8  -4 223.667 1.62993   1
   9  -8  -3-0.19577 0.68382   1
  -7   8  -3 4.68884 0.99345  -2
  -9  -8   3 4.68884 0.99345   1
   9  -8  -2-0.60374 0.46934   1
  -9  -8   1 2.05780 0.83506   1
   8   8   1 246.173 1.40755  -2
   9  -8  -1 246.173 1.40755   1
   9   8   0 2.08407 0.60062  -2
   9  -8   0 2.08407 0.60062   1
   9   8   1 0.51686 0.91103   1
 -10  -8   1 95.2681 0.97674  -2
  -9   8  -1 95.2681 0.97674   1
   9   8   2 1.39506 0.44885   1
  -9   8  -3 4.40554 0.52036   1
  11  -8  -3-10.0909 1.26753  -2
   9   8   3-10.0909 1.26753   1
 -12  -8   4 36.0832 0.86247  -2
  -9   8  -4 36.0832 0.86247   1
  13   8  -5-3.31227 0.87199  -2
   9  -8   5-3.31227 0.87199   1
   9  -8   6-0.53279 0.59461   1
   9  -8   7 4.02911 0.98523   1
  14  -8  -7 352.132 4.56113  -2
   9   8   7 352.132 4.56113   1
  15   8  -8 0.45089 1.58884  -2
   9  -8   8 0.45089 1.58884   1
  16   8  -9 707.068 3.50258  -2
   9  -8   9 707.068 3.50258   1
  -9  -8 -10-1.82725 1.14640   1
  -9  -8 -11 4.32819 2.00099   1
  17   8 -11 2.35812 1.83911  -2
   9  -8  11 2.35812 1.83911   1
  18   8 -12 1987.23 7.56593  -2
   9  -8  12 1987.23 7.56593   1
  19   8 -13 4.84237 1.55852  -2
   9  -8  13 4.84237 1.55852   1
  -9  -8 -14-18.2114 1.09202   1
  20  -8 -15 596.199 6.39302  -2
   9   8  15 596.199 6.39302   1
  21   8 -16 33.5797 1.87250  -2
   9  -8  16 33.5797 1.87250   1
   9   9 -19 4280.26 15.9697   1
   5   9 -19 4450.64 11.0587  -2
  -9  -9  19 4450.64 11.0587   1
  -9  -9  18 4383.79 9.08895   1
  -4   9  17 11032.8 15.1831  -2
   9  -9 -17 11032.8 15.1831   1
  -3   9  16 876.592 5.34010  -2
   9  -9 -16 876.592 5.34010   1
   9   9 -15 31648.8 27.7735   1
  -2   9  15 31705.5 38.6915  -2
   9  -9 -15 31705.5 38.6915   1
   9   9 -14 729.633 4.37641   1
  -2   9  14 695.069 6.16147  -2
   9  -9 -14 695.069 6.16147   1
  -1   9  13 6433.40 9.94339  -2
   9  -9 -13 6433.40 9.94339   1
   0   9 -12 604.525 4.15336  -2
  -9  -9  12 604.525 4.15336   1
   9   9 -11 3180.26 11.6680   1
   1   9  11 3324.36 7.64865  -2
   9  -9 -11 3324.36 7.64865   1
  -9  -9  10 1555.72 3.82936   1
  -2   9  -9 591.533 2.10485  -2
  -9  -9   9 591.533 2.10485   1
  -3  -9  -8 4396.44 7.35242  -2
  -9   9   8 4396.44 7.35242   1
  -9   9   7 73.5394 1.09051   1
   4   9   7 100.033 1.75183  -2
   9  -9  -7 100.033 1.75183   1
   9   9  -6 6957.23 6.77120   1
   9   9  -5 27477.6 29.7711   1
  -5   9  -5 29870.3 14.4054  -2
  -9  -9   5 29870.3 14.4054   1
   6   9   4 6028.28 6.86132  -2
   9  -9  -4 6028.28 6.86132   1
  -9   9   3 13961.8 8.97551   1
   7   9   3 15312.1 19.2540  -2
   9  -9  -3 15312.1 19.2540   1
   9  -9  -2 1649.07 2.78071   1
   9  -9  -1 3604.44 4.67217   1
   9   9   0 50465.7 21.0084  -2
   9  -9   0 50465.7 21.0084   1
   9   9   1 73.5701 2.01346   1
  10   9  -1 65.4186 0.81477  -2
   9  -9   1 65.4186 0.81477   1
   9   9   2 2725.90 4.24150   1
   9  -9   3 101.905 2.02015   1
  11  -9  -3 88.5662 1.68901  -2
   9   9   3 88.5662 1.68901   1
 -12  -9   4 3340.10 5.52979  -2
  -9   9  -4 3340.10 5.52979   1
 -13  -9   5 6577.84 6.52532  -2
  -9   9  -5 6577.84 6.52532   1
   9  -9   6 2130.91 4.56217   1
  -9  -9  -7 177.184 3.27261   1
  14   9  -7 160.330 2.43287  -2
   9  -9   7 160.330 2.43287   1
  15   9  -8 994.865 5.18552  -2
   9  -9   8 994.865 5.18552   1
  16   9  -9 1847.31 5.29409  -2
   9  -9   9 1847.31 5.29409   1
   9  -9  10 6473.14 10.1382   1
  -9  -9 -11 9113.85 20.2599   1
  17   9 -11 13858.1 17.9599  -2
   9  -9  11 13858.1 17.9599   1
 -18   9  12 6782.88 14.0564  -2
  -9  -9 -12 6782.88 14.0564   1
 -19   9  13 1637.51 5.52254  -2
  -9  -9 -13 1637.51 5.52254   1
   9  -9  14 84.9583 1.37340   1
  -9  -9 -15 19345.8 30.8191   1
  20   9 -15 20040.6 22.8823  -2
   9  -9  15 20040.6 22.8823   1
   9 -10 -18 7.99722 1.19913   1
   4  10 -17 185.483 2.23580  -2
  -9 -10  17 185.483 2.23580   1
   3  10 -16-2.53140 1.52717  -2
  -9 -10  16-2.53140 1.52717   1
   9  10 -15 2.05408 3.15903   1
  -2  10  15 8511.25 14.4105  -2
   9 -10 -15 8511.25 14.4105   1
   9  10 -14 22.2057 1.16194   1
  -2  10  14 3107.04 12.3691  -2
   9 -10 -14 3107.04 12.3691   1
  -1 -10  13-1.56895 1.36530  -2
   9  10 -13-1.56895 1.36530   1
   0  10  12 2780.92 8.59335  -2
   9 -10 -12 2780.92 8.59335   1
   9  10 -11 2.84330 2.70770   1
  -1  10 -11-5.71259 1.52921  -2
  -9 -10  11-5.71259 1.52921   1
   9 -10 -10 0.29824 1.63892   1
   2  10   9 1828.01 6.23944  -2
   9 -10  -9 1828.01 6.23944   1
   3  10   8 6.62333 1.87017  -2
   9 -10  -8 6.62333 1.87017   1
  -9 -10   7 4.01926 1.20544   1
   4  10   7 95.5176 2.74353  -2
   9 -10  -7 95.5176 2.74353   1
   9 -10  -6 3.72922 0.75286   1
   9  10  -5 6.80822 1.42726   1
   5  10   5 6.68828 0.86888  -2
   9 -10  -5 6.68828 0.86888   1
  -6 -10  -4 1703.75 4.24198  -2
  -9  10   4 1703.75 4.24198   1
  -9  10   3-2.72879 0.85101   1
  -7  10  -3 1.53284 1.63623  -2
  -9 -10   3 1.53284 1.63623   1
   9  10  -2 0.08846 0.66775   1
   9  10  -1-8.09926 0.89383   1
  -8  10  -1 1282.12 5.92701  -2
  -9 -10   1 1282.12 5.92701   1
   9  10   0 0.07321 1.84937  -2
   9 -10   0 0.07321 1.84937   1
  -9 -10  -1-3.58475 1.31033   1
   9 -10   2 2.23324 1.18769   1
  -9 -10  -3 2.46071 1.89647   1
  11  10  -3-2.93287 1.28379  -2
   9 -10   3-2.93287 1.28379   1
  12  10  -4 8.99462 1.12907  -2
   9 -10   4 8.99462 1.12907   1
 -13  10   5 9.53657 1.32259  -2
  -9 -10  -5 9.53657 1.32259   1
   9 -10   6 0.36868 1.13978   1
  -9 -10  -7-4.16391 2.14325   1
  14  10  -7 5807.48 10.9765  -2
   9 -10   7 5807.48 10.9765   1
 -15  10   8 5.18460 1.81601  -2
  -9 -10  -8 5.18460 1.81601   1
  -9 -10  -9-1.87923 2.21150   1
  16 -10  -9 608.501 4.33689  -2
   9  10   9 608.501 4.33689   1
   9 -10  10 8.18515 1.12598   1
  -9 -10 -11-0.72422 1.71695   1
  17  10 -11 11.1621 1.77141  -2
   9 -10  11 11.1621 1.77141   1
  18 -10 -12 346.580 4.04543  -2
   9  10  12 346.580 4.04543   1
  19  10 -13-1.67630 1.36255  -2
   9 -10  13-1.67630 1.36255   1
  -9 -10 -14-1.69271 1.28324   1
  -4  11  17 4075.10 9.33759  -2
   9 -11 -17 4075.10 9.33759   1
   3  11 -16 1115.57 9.71266  -2
  -9 -11  16 1115.57 9.71266   1
   9  11 -15 24945.2 37.6281   1
   2  11 -15 22945.2 30.6894  -2
  -9 -11  15 22945.2 30.6894   1
  -9 -11  14 521.969 3.65928   1
  -2  11  14 577.892 5.94927  -2
   9 -11 -14 577.892 5.94927   1
  -1  11  13 2633.13 9.26766  -2
   9 -11 -13 2633.13 9.26766   1
   0  11  12 4534.24 14.1545  -2
   9 -11 -12 4534.24 14.1545   1
   9  11 -11 523.665 5.68489   1
   1  11  11 766.459 6.07536  -2
   9 -11 -11 766.459 6.07536   1
   9 -11 -10 20626.0 30.6231   1
  -2  11  -9 5651.83 11.1604  -2
  -9 -11   9 5651.83 11.1604   1
   3  11   8 3008.87 10.7445  -2
   9 -11  -8 3008.87 10.7445   1
  -9 -11   7 807.990 6.37573   1
   4  11   7 629.221 5.11040  -2
   9 -11  -7 629.221 5.11040   1
   9 -11  -6 5216.61 10.2389   1
  -9 -11   5 7649.92 17.5483   1
  -6  11  -4 636.425 7.06806  -2
  -9 -11   4 636.425 7.06806   1
  -9 -11   3 766.233 5.79045   1
  -9 -11   2 239.096 3.60190   1
  -9 -11   1 270.317 3.77633   1
  -9  11   0 2300.18 9.23393  -2
  -9 -11   0 2300.18 9.23393   1
  -9 -11  -1 20.9985 2.32363   1
  10  11  -1 29.8425 1.89135  -2
   9 -11   1 29.8425 1.89135   1
  -9 -11  -2 4328.76 8.84282   1
  -9 -11  -3 3531.90 12.0897   1
  11  11  -3 3909.31 11.5173  -2
   9 -11   3 3909.31 11.5173   1
  12 -11  -4 179.764 1.99069  -2
   9  11   4 179.764 1.99069   1
  -9 -11  -5 13318.7 23.3881   1
  13  11  -5 14875.3 17.7252  -2
   9 -11   5 14875.3 17.7252   1
   9 -11   6 2776.29 6.36285   1
  -9 -11  -7 415.661 4.53709   1
  14 -11  -7 401.337 3.24617  -2
   9  11   7 401.337 3.24617   1
  15 -11  -8 833.557 4.83656  -2
   9  11   8 833.557 4.83656   1
  -9 -11  -9 4481.63 13.9920   1
  16  11  -9 4502.86 10.8382  -2
   9 -11   9 4502.86 10.8382   1
   9  11  10 23683.5 20.0960   1
  -9 -11 -11 723.466 5.83087   1
  17  11 -11 1007.43 5.11704  -2
   9 -11  11 1007.43 5.11704   1
 -18  11  12 3407.81 12.5098  -2
  -9 -11 -12 3407.81 12.5098   1
   9  12 -15 3.90272 2.25553   1
   9  12 -14-14.3173 2.01463   1
  -2  12  14 1317.06 8.20672  -2
   9 -12 -14 1317.06 8.20672   1
  -1  12  13-3.68371 2.87010  -2
   9 -12 -13-3.68371 2.87010   1
   0 -12  12 97.9922 2.65977  -2
   9  12 -12 97.9922 2.65977   1
   1  12  11 4.56394 2.64000  -2
   9 -12 -11 4.56394 2.64000   1
   9  12 -10 4.47825 2.22348   1
   1  12  10 18.5726 1.96934  -2
   9 -12 -10 18.5726 1.96934   1
   2  12   9 2094.21 6.87979  -2
   9 -12  -9 2094.21 6.87979   1
  -3  12  -8 19.4337 2.92697  -2
  -9 -12   8 19.4337 2.92697   1
  -9 -12   6-4.69071 2.29983   1
  -9 -12   5 7.71015 2.58716   1
  -6  12  -4 59.3852 3.69347  -2
  -9 -12   4 59.3852 3.69347   1
  -9 -12   3-2.63173 1.58945   1
  -9 -12   2 10.5419 1.96866   1
  -9 -12   1-0.23086 1.95139   1
  -9  12   0 1.96737 1.85224  -2
  -9 -12   0 1.96737 1.85224   1
  -9 -12  -1-3.22114 1.76939   1
  -9 -12  -2 0.13876 2.02043   1
   9 -12   3 3.30568 1.17150   1
 -12  12   4 7.91688 1.20920  -2
  -9 -12  -4 7.91688 1.20920   1
  -9 -12  -5 3.96568 1.57472   1
  13  12  -5 22.8732 2.37156  -2
   9 -12   5 22.8732 2.37156   1
   9 -12   6 5.72834 0.91718   1
  -9 -12  -7 0.07243 1.25854   1
  14  12  -7 2.08561 1.65144  -2
   9 -12   7 2.08561 1.65144   1
  15  12  -8 8.84150 1.37201  -2
   9 -12   8 8.84150 1.37201   1
  -9 -12  -9-25.7931 1.82340   1
  16  12  -9 262.829 2.85802  -2
   9 -12   9 262.829 2.85802   1
   9 -12  10 3.54342 1.12454   1
  -9 -12 -11-8.08817 1.71809   1
  17 -12 -11-6.68581 3.02117  -2
   9  12  11-6.68581 3.02117   1
  -1  13  13 874.881 7.93164  -2
   9 -13 -13 874.881 7.93164   1
   0 -13  12 3274.02 16.9968  -2
   9  13 -12 3274.02 16.9968   1
   9  13 -11 1922.25 10.2421   1
   1  13  11 2001.68 9.60782  -2
   9 -13 -11 2001.68 9.60782   1
   9  13 -10 10634.8 16.5595   1
  -9 -13   7 6567.14 17.9704   1
  -9 -13   6 429.590 4.91526   1
  -5  13  -5 383.652 5.17202  -2
  -9 -13   5 383.652 5.17202   1
  -6  13  -4 2972.57 15.9233  -2
  -9 -13   4 2972.57 15.9233   1
  -9 -13   3 861.499 6.50869   1
  -9 -13   2 154.357 3.13371   1
  -9 -13   1 96.5896 2.48837   1
  -9  13   0 4722.17 19.2213  -2
  -9 -13   0 4722.17 19.2213   1
  -9 -13  -1 1832.17 9.04900   1
  -9 -13  -2 561.803 5.11702   1
  -9 -13  -3 348.650 4.10790   1
 -12  13   4 6077.28 15.9961  -2
  -9 -13  -4 6077.28 15.9961   1
  -9 -13  -5 4192.10 13.9447   1
   9 -13   6 11582.7 16.0382   1
  -9 -13  -7 111.534 2.16658   1
   9  14 -10-3.48060 1.95685   1
   2 -14   9 741.989 6.22066  -2
   9  14  -9 741.989 6.22066   1
  -9 -14   7 2.95214 1.77928   1
  -9 -14   6 6.72592 1.66369   1
  -5  14  -5 16.8028 2.20252  -2
  -9 -14   5 16.8028 2.20252   1
  -9 -14   3-16.6543 1.74068   1
  -9 -14   2 10.1814 2.03383   1
  -9 -14   1-12.3400 1.79934   1
  -9  14   0-5.66371 2.49538  -2
  -9 -14   0-5.66371 2.49538   1
  -9 -14  -1 0.69406 1.97815   1
  -9 -14  -2-7.89136 1.97190   1
  -9 -14  -3 10.6634 1.77843   1
 -12  14   4 22.3014 2.32856  -2
  -9 -14  -4 22.3014 2.32856   1
  -9 -14  -5-5.73819 1.64347   1
  -9 -15   3 1323.02 8.31027   1
  -9 -15   2 630.009 5.56571   1
  10   0 -23 751.696 6.06726   1
  10   0 -22 37.5754 1.33164   1
   6   0 -21 4074.64 10.1428  -2
 -10   0  21 4074.64 10.1428   1
  -5   0  20 1646.34 7.83977  -2
  10   0 -20 1646.34 7.83977   1
  10   0 -19 94.4554 1.64396   1
  10   0 -18 59004.1 33.6018   1
  -3   0  17 9099.00 10.4253  -2
  10   0 -17 9099.00 10.4253   1
   2   0 -16 37753.7 23.6502  -2
 -10   0  16 37753.7 23.6502   1
  10   0 -15 91784.0 27.6964   1
  10   0 -14 11934.8 8.24262   1
   0   0  13 10635.2 7.05004  -2
  10   0 -13 10635.2 7.05004   1
   1   0  12 34253.7 16.7337  -2
  10   0 -12 34253.7 16.7337   1
  10   0 -11 679.898 1.56765   1
  10   0 -10 2875.30 2.95947   1
  10   0  -9 418.210 1.87421   1
   3   0   9 409.886 1.55105  -2
  10   0  -9 409.886 1.55105   1
   4   0   8 390409. 42.3306  -2
  10   0  -8 390409. 42.3306   1
  10   0  -7 790.766 1.66473   1
  10   0  -6 5490.39 4.15894   1
 -10   0   5 185925. 48.0731   1
   6   0   5 239502. 28.5249  -2
  10   0  -5 239502. 28.5249   1
   7   0   4 166.756 1.06309  -2
  10   0  -4 166.756 1.06309   1
  10   0  -3 429.574 2.71405   1
   8   0   3 582.548 1.48172  -2
  10   0  -3 582.548 1.48172   1
  10   0  -2 2970.41 2.86831   1
   9   0   1 3579.23 3.01900  -2
  10   0  -1 3579.23 3.01900   1
 -10   0   0 181047. 33.2304  -2
 -10   0   0 181047. 33.2304   1
  10   0   1 13308.7 14.1825   1
  11   0  -1 13463.3 6.47117  -2
  10   0   1 13463.3 6.47117   1
  10   0   2 1116.54 3.49474   1
 -10   0  -3 328740. 28.7404   1
  13   0  -4 1594.10 2.64897  -2
  10   0   4 1594.10 2.64897   1
 -10   0  -5 141.612 1.01675   1
 -14   0   5 178.446 1.25125  -2
 -10   0  -5 178.446 1.25125   1
 -10   0  -6 26788.0 9.12239   1
 -10   0  -7 5500.85 5.07547   1
 -16   0   8 16046.1 11.6066  -2
 -10   0  -8 16046.1 11.6066   1
  17   0  -9 37444.7 13.6679  -2
  10   0   9 37444.7 13.6679   1
 -10   0 -10 58825.0 21.8437   1
 -10   0 -11 21067.4 13.8398   1
 -19   0  12 6530.71 11.4609  -2
 -10   0 -12 6530.71 11.4609   1
 -20   0  13 57443.2 47.1119  -2
 -10   0 -13 57443.2 47.1119   1
 -10   0 -14 7193.77 17.9985   1
 -10   0 -15 23133.4 33.0956   1
 -22   0  16 2390.58 13.6418  -2
 -10   0 -16 2390.58 13.6418   1
 -23   0  17 3627.54 13.7339  -2
 -10   0 -17 3627.54 13.7339   1
 -10   0 -18 6339.40 18.6723   1
 -10   0 -19 32.5924 1.99702   1
  -8  -1  24 8.95335 2.64403  -2
  10   1 -24 8.95335 2.64403   1
  10   1 -23 29.7443 2.03817   1
 -10  -1  22 8.22385 1.37866   1
   6   1 -21 6.37341 1.18178  -2
 -10  -1  21 6.37341 1.18178   1
  -5  -1  20 605.622 3.88616  -2
  10   1 -20 605.622 3.88616   1
 -10  -1  19-7.12701 0.78156   1
  10   1 -18 1.12638 0.72969   1
  -3  -1  17 3402.82 5.01617  -2
  10   1 -17 3402.82 5.01617   1
  -2  -1  16 4.93338 0.65112  -2
  10   1 -16 4.93338 0.65112   1
  10   1 -15 0.42888 0.49158   1
  -1   1  15 234.451 2.77241  -2
  10  -1 -15 234.451 2.77241   1
  10  -1 -14-0.04314 0.41538   1
   0  -1 -13 3.21255 0.47954  -2
 -10   1  13 3.21255 0.47954   1
   1  -1  12 101.663 0.73813  -2
  10   1 -12 101.663 0.73813   1
  10  -1 -11 1.37582 0.30770   1
  10   1 -10 1.33301 0.26136   1
  10   1  -9 0.64292 0.38617   1
   3  -1   9 389.133 1.03221  -2
  10   1  -9 389.133 1.03221   1
  -4   1  -8 1.78168 0.38579  -2
 -10  -1   8 1.78168 0.38579   1
  10   1  -7 0.05719 0.28589   1
  10  -1  -6-0.56630 0.26716   1
 -10  -1   5 1.28066 0.57870   1
   6   1   5 0.41298 0.43409  -2
  10  -1  -5 0.41298 0.43409   1
   7  -1   4 728.975 1.39629  -2
  10   1  -4 728.975 1.39629   1
  10   1  -3-1.53381 1.09668   1
   8   1   3 0.19624 0.33592  -2
  10  -1  -3 0.19624 0.33592   1
  10   1  -2 1.52811 0.27798   1
 -10   1   1 2.22735 0.86680   1
   9   1   1 10.6595 0.38370  -2
  10  -1  -1 10.6595 0.38370   1
  10   1   0 1.47601 0.31182  -2
  10  -1   0 1.47601 0.31182   1
  10  -1   1 10.6821 0.46016   1
 -11  -1   1 1832.38 1.96029  -2
 -10   1  -1 1832.38 1.96029   1
  10  -1   2 0.13715 0.27153   1
 -10   1  -3 1.09820 0.28832   1
 -12   1   3 3.45612 0.59582  -2
 -10  -1  -3 3.45612 0.59582   1
  13   1  -4 133.451 0.66358  -2
  10  -1   4 133.451 0.66358   1
  10   1   5 0.75594 0.58213   1
  14  -1  -5 4.38046 0.42502  -2
  10   1   5 4.38046 0.42502   1
 -10   1  -6-0.41045 0.31551   1
  10   1   7 1.76734 0.34829   1
  16   1  -8 0.63211 0.48382  -2
  10  -1   8 0.63211 0.48382   1
  17   1  -9 962.467 1.75601  -2
  10  -1   9 962.467 1.75601   1
  10  -1  10 5.63071 0.41424   1
 -10   1 -11 2.86817 0.45764   1
  18   1 -11-9.34083 1.72987  -2
  10  -1  11-9.34083 1.72987   1
 -19  -1  12 3508.33 6.51317  -2
 -10   1 -12 3508.33 6.51317   1
 -20  -1  13 9.11599 1.49194  -2
 -10   1 -13 9.11599 1.49194   1
 -10   1 -14 3.37789 0.97692   1
 -10   1 -15-0.42888 1.25212   1
 -22  -1  16 3.87709 1.45554  -2
 -10   1 -16 3.87709 1.45554   1
 -23  -1  17 1917.30 7.00531  -2
 -10   1 -17 1917.30 7.00531   1
 -10   1 -18 6.89237 1.37260   1
 -10   1 -19 18.3332 1.40543   1
  -8  -2  24 831.359 5.71349  -2
  10   2 -24 831.359 5.71349   1
 -10  -2  23 962.192 5.04366   1
  10   2 -22 4009.16 10.1698   1
   6   2 -21 21697.5 23.9124  -2
 -10  -2  21 21697.5 23.9124   1
  -5  -2  20 1482.50 7.77125  -2
  10   2 -20 1482.50 7.77125   1
  10   2 -19 1341.19 5.70275   1
  10   2 -18 328.505 2.26771   1
  -3  -2  17 678.640 2.67667  -2
  10   2 -17 678.640 2.67667   1
  -2  -2  16 291.281 1.58822  -2
  10   2 -16 291.281 1.58822   1
 -10  -2  15 2579.07 3.61809   1
  -1   2  15 2493.62 8.26954  -2
  10  -2 -15 2493.62 8.26954   1
  10  -2 -14 1094.29 1.94843   1
   0  -2 -13 141381. 19.8838  -2
 -10   2  13 141381. 19.8838   1
  -1  -2 -12 2295.32 3.37227  -2
 -10   2  12 2295.32 3.37227   1
  10  -2 -11 269.092 0.94005   1
  10  -2 -10 152308. 19.1230   1
  10   2  -9 13303.8 10.3086   1
   3   2   9 13541.8 5.57157  -2
  10  -2  -9 13541.8 5.57157   1
   4   2   8 561.038 1.27433  -2
  10  -2  -8 561.038 1.27433   1
  10  -2  -7 197.207 0.64316   1
  -5   2  -7 203.829 2.05324  -2
 -10  -2   7 203.829 2.05324   1
  10  -2  -6 6386.85 2.93614   1
 -10   2   5 22597.2 9.18057   1
   6   2   5 27283.8 7.00226  -2
  10  -2  -5 27283.8 7.00226   1
   7   2   4 6267.95 3.73490  -2
  10  -2  -4 6267.95 3.73490   1
 -10   2   3 28063.4 8.26353   1
   8   2   3 34661.1 8.86093  -2
  10  -2  -3 34661.1 8.86093   1
 -10   2   2 61319.7 8.98808   1
 -10   2   1 1282.26 2.44527   1
   9   2   1 1306.57 1.45182  -2
  10  -2  -1 1306.57 1.45182   1
  10  -2   0 36457.3 8.36942  -2
  10   2   0 36457.3 8.36942   1
  10  -2   1 5239.12 4.64407   1
 -11   2   1 5179.93 3.20624  -2
 -10  -2  -1 5179.93 3.20624   1
  10  -2   2 1420.16 1.46559   1
  10  -2   3 14608.5 5.52100   1
 -12   2   3 21107.0 13.6151  -2
 -10  -2  -3 21107.0 13.6151   1
  13   2  -4 830.618 1.52122  -2
  10  -2   4 830.618 1.52122   1
 -10   2  -5 99888.4 46.8575   1
  14   2  -5 117013. 15.4534  -2
  10  -2   5 117013. 15.4534   1
  10  -2   6 11740.9 5.12637   1
 -10   2  -7 22498.9 8.22207   1
 -15   2   7 23211.5 15.7313  -2
 -10  -2  -7 23211.5 15.7313   1
  16   2  -8 178259. 27.8034  -2
  10  -2   8 178259. 27.8034   1
 -17  -2   9 119.955 0.81402  -2
 -10   2  -9 119.955 0.81402   1
  10   2  10 9983.45 6.40371   1
 -10   2 -11 4447.88 4.79104   1
 -18   2  11 4937.42 11.7958  -2
 -10  -2 -11 4937.42 11.7958   1
 -19  -2  12 5316.97 8.94593  -2
 -10   2 -12 5316.97 8.94593   1
 -20   2  13 420.999 2.28535  -2
 -10  -2 -13 420.999 2.28535   1
 -10   2 -14 12784.2 13.7136   1
 -10   2 -15 5100.36 10.9452   1
  21  -2 -15 5926.30 16.2360  -2
  10   2  15 5926.30 16.2360   1
 -22  -2  16 23235.8 28.8607  -2
 -10   2 -16 23235.8 28.8607   1
 -23  -2  17 4061.31 10.2228  -2
 -10   2 -17 4061.31 10.2228   1
 -10   2 -18 490.764 3.64776   1
 -10  -3  23-1.75858 1.37202   1
 -10  -3  22 4.41091 1.30138   1
   6   3 -21-1.89664 2.59632  -2
 -10  -3  21-1.89664 2.59632   1
  -5  -3  20 169.393 3.16748  -2
  10   3 -20 169.393 3.16748   1
 -10  -3  19-13.9656 1.39004   1
  -4   3  19-1.18154 2.08243  -2
  10  -3 -19-1.18154 2.08243   1
 -10  -3  18-1.42439 0.95605   1
  -3  -3  17 5247.11 8.33624  -2
  10   3 -17 5247.11 8.33624   1
  -2  -3  16 4.36194 0.76171  -2
  10   3 -16 4.36194 0.76171   1
  10   3 -15-4.04849 0.62055   1
  -1   3  15 560.478 2.57397  -2
  10  -3 -15 560.478 2.57397   1
 -10   3  14 1.48226 0.48463   1
   0   3  13 1.87470 0.63756  -2
  10  -3 -13 1.87470 0.63756   1
  -1  -3 -12 9.72012 0.51738  -2
 -10   3  12 9.72012 0.51738   1
  10   3 -11-1.28236 0.46442   1
   2   3  11 0.30157 1.14958  -2
  10  -3 -11 0.30157 1.14958   1
  10  -3 -10-0.43746 0.38540   1
  -3  -3  -9 46.7630 0.54190  -2
 -10   3   9 46.7630 0.54190   1
  -4   3  -8 8.99638 0.39708  -2
 -10  -3   8 8.99638 0.39708   1
  10  -3  -7 0.99379 0.26644   1
   5   3   7 6.79901 1.90671  -2
  10  -3  -7 6.79901 1.90671   1
  10  -3  -6 0.26827 0.23797   1
 -10  -3   5 0.00413 0.46857   1
   6   3   5 2.10463 0.42564  -2
  10  -3  -5 2.10463 0.42564   1
   7   3   4 2797.94 2.44648  -2
  10  -3  -4 2797.94 2.44648   1
  10   3  -3 2.33009 0.39464   1
  -8  -3  -3 2.78486 0.39221  -2
 -10   3   3 2.78486 0.39221   1
 -10   3   2-0.69545 0.19781   1
  10  -3  -1 4.16568 0.47988   1
   9   3   1 1525.47 1.71344  -2
  10  -3  -1 1525.47 1.71344   1
  10  -3   0 2.30409 0.34922  -2
  10   3   0 2.30409 0.34922   1
 -10   3  -1-1.12684 0.70860   1
 -11   3   1 3174.84 2.88328  -2
 -10  -3  -1 3174.84 2.88328   1
  10  -3   2-0.17913 0.35072   1
 -10   3  -3 0.38403 0.44123   1
 -12   3   3-0.13531 0.84815  -2
 -10  -3  -3-0.13531 0.84815   1
  13   3  -4 467.927 1.45302  -2
  10  -3   4 467.927 1.45302   1
 -10   3  -5 1.96283 0.44348   1
  14  -3  -5 5.28436 0.64193  -2
  10   3   5 5.28436 0.64193   1
  10   3   6-1.26783 0.35808   1
 -10   3  -7 0.59578 0.37512   1
 -16  -3   8 2.29122 0.56628  -2
 -10   3  -8 2.29122 0.56628   1
 -17  -3   9 2158.26 2.61221  -2
 -10   3  -9 2158.26 2.61221   1
 -10   3 -10 1.28698 0.44206   1
  10  -3  11 1.89688 0.60955   1
  19   3 -12 4174.27 8.17055  -2
  10  -3  12 4174.27 8.17055   1
  20   3 -13-4.60798 1.27064  -2
  10  -3  13-4.60798 1.27064   1
  10  -3  14 4.02919 0.76587   1
  10  -3  15 5.42897 0.99617   1
  21  -3 -15 647.525 5.78656  -2
  10   3  15 647.525 5.78656   1
  22  -3 -16 2.03476 1.83119  -2
  10   3  16 2.03476 1.83119   1
 -23  -3  17 1790.37 6.76899  -2
 -10   3 -17 1790.37 6.76899   1
 -10   3 -18 0.13735 1.39197   1
  10   4 -22 688.636 4.40897   1
  -6  -4  21 763.573 4.95659  -2
  10   4 -21 763.573 4.95659   1
  -5   4  20 96.3918 1.95339  -2
  10  -4 -20 96.3918 1.95339   1
  10   4 -19 136.572 3.22188   1
  -4   4  19 227.596 2.65311  -2
  10  -4 -19 227.596 2.65311   1
  10   4 -18 36686.1 23.1791   1
  -3   4  17 3075.45 6.74318  -2
  10  -4 -17 3075.45 6.74318   1
  -2   4  16 20066.7 15.8387  -2
  10  -4 -16 20066.7 15.8387   1
 -10   4  15 46726.6 19.0931   1
  -1   4  15 44538.6 25.2592  -2
  10  -4 -15 44538.6 25.2592   1
  10  -4 -14 7752.70 5.75336   1
   0  -4  13 377.429 1.32792  -2
  10   4 -13 377.429 1.32792   1
   1   4  12 18624.7 10.2630  -2
  10  -4 -12 18624.7 10.2630   1
  10  -4 -11 364.924 1.32736   1
  -2   4 -11 671.271 4.18596  -2
 -10  -4  11 671.271 4.18596   1
  10  -4 -10 18508.4 8.18517   1
  10  -4  -9 31.7126 1.71080   1
   3   4   9 91.7092 1.15127  -2
  10  -4  -9 91.7092 1.15127   1
  -4  -4  -8 203891. 31.4418  -2
 -10   4   8 203891. 31.4418   1
 -10   4   7 112.039 0.89190   1
  -5   4  -7 112.402 1.26476  -2
 -10  -4   7 112.402 1.26476   1
  10  -4  -6 8853.88 4.30444   1
  10  -4  -5 113806. 25.5972   1
  -6   4  -5 152615. 17.8884  -2
 -10  -4   5 152615. 17.8884   1
   7   4   4 409.676 1.13450  -2
  10  -4  -4 409.676 1.13450   1
  10  -4  -3 8506.74 5.16043   1
   8   4   3 9146.31 5.30815  -2
  10  -4  -3 9146.31 5.30815   1
 -10   4   2 1901.77 1.75862   1
  10  -4  -1 308.183 1.47995   1
   9   4   1 292.417 0.97425  -2
  10  -4  -1 292.417 0.97425   1
 -10  -4   0 130806. 21.1456  -2
 -10   4   0 130806. 21.1456   1
 -10   4  -1 15392.2 10.0761   1
  11   4  -1 14515.1 6.03517  -2
  10  -4   1 14515.1 6.03517   1
  10  -4   2 916.905 1.43551   1
 -10   4  -3 166413. 23.4002   1
  12   4  -3 227044. 37.5911  -2
  10  -4   3 227044. 37.5911   1
  13  -4  -4 2637.24 3.12734  -2
  10   4   4 2637.24 3.12734   1
 -10   4  -5 4060.45 9.96846   1
  14  -4  -5 4643.52 3.54492  -2
  10   4   5 4643.52 3.54492   1
 -10   4  -6 18867.1 7.71473   1
 -10   4  -7 1132.64 2.21418   1
 -15   4   7 1139.87 5.23049  -2
 -10  -4  -7 1139.87 5.23049   1
  16  -4  -8 354.699 1.50526  -2
  10   4   8 354.699 1.50526   1
 -10   4  -9 31192.6 32.7043   1
  17  -4  -9 28387.8 10.0514  -2
  10   4   9 28387.8 10.0514   1
  10  -4  10 22362.0 9.88195   1
  10  -4  11 12767.3 8.80878   1
 -19  -4  12 2137.40 5.98342  -2
 -10   4 -12 2137.40 5.98342   1
  20   4 -13 34901.7 19.1379  -2
  10  -4  13 34901.7 19.1379   1
  10  -4  14 4222.24 6.88890   1
 -10   4 -15 11339.4 16.4081   1
  21   4 -15 11849.3 16.0378  -2
  10  -4  15 11849.3 16.0378   1
 -22   4  16 4746.58 11.4534  -2
 -10  -4 -16 4746.58 11.4534   1
 -23   4  17 5416.21 12.3104  -2
 -10  -4 -17 5416.21 12.3104   1
  10   4  18 3605.74 8.08611   1
  10   5 -22-0.64416 1.42101   1
  -6   5  21 3.37687 1.58108  -2
  10  -5 -21 3.37687 1.58108   1
  -5   5  20 2390.40 8.33189  -2
  10  -5 -20 2390.40 8.33189   1
  10   5 -19 0.32444 2.34347   1
   4   5 -19 6.89485 1.73027  -2
 -10  -5  19 6.89485 1.73027   1
  10  -5 -18-3.77535 1.28613   1
  -3  -5  17 1726.36 5.71553  -2
  10   5 -17 1726.36 5.71553   1
  -2   5  16-3.34100 1.84425  -2
  10  -5 -16-3.34100 1.84425   1
  10   5 -15-0.60022 1.31095   1
  -1   5  15 1616.22 4.47323  -2
  10  -5 -15 1616.22 4.47323   1
 -10   5  14 5.64000 0.61641   1
   0   5  13 6.62559 0.84104  -2
  10  -5 -13 6.62559 0.84104   1
   1  -5  12 253.123 1.45538  -2
  10   5 -12 253.123 1.45538   1
 -10   5  11-1.33755 0.55947   1
   2   5  11 5.99385 1.33231  -2
  10  -5 -11 5.99385 1.33231   1
  10  -5 -10 2.35916 0.47409   1
   3   5   9 272.807 1.07300  -2
  10  -5  -9 272.807 1.07300   1
  -4   5  -8 4.70339 0.59021  -2
 -10  -5   8 4.70339 0.59021   1
 -10   5   7 1.40352 0.64641   1
   5   5   7 6535.76 5.73804  -2
  10  -5  -7 6535.76 5.73804   1
  10   5  -6 1.64251 0.42369   1
  -6   5  -5 0.10439 0.56175  -2
 -10  -5   5 0.10439 0.56175   1
  -7   5  -4 70.4619 0.58322  -2
 -10  -5   4 70.4619 0.58322   1
  10  -5  -3 1.57000 0.42245   1
   8   5   3 0.28701 0.49402  -2
  10  -5  -3 0.28701 0.49402   1
  10  -5  -2 1.02614 0.31947   1
 -10  -5   1-1.97061 1.13107   1
  -9  -5  -1 595.677 1.34054  -2
 -10   5   1 595.677 1.34054   1
  10  -5   0 2.49327 0.59033  -2
  10   5   0 2.49327 0.59033   1
 -10   5  -1 1.40143 1.10523   1
  11   5  -1 480.573 1.34168  -2
  10  -5   1 480.573 1.34168   1
  10   5   2 0.99740 0.41203   1
 -10   5  -3-1.04644 0.46781   1
 -12   5   3 17.5550 1.46669  -2
 -10  -5  -3 17.5550 1.46669   1
 -13  -5   4 112.918 1.06299  -2
 -10   5  -4 112.918 1.06299   1
 -10   5  -5-17.7401 1.36719   1
  14   5  -5 3.82213 0.76113  -2
  10  -5   5 3.82213 0.76113   1
  10  -5   6-1.54723 0.52946   1
  10   5   7 1.56367 0.49762   1
 -16   5   8 0.67922 0.64890  -2
 -10  -5  -8 0.67922 0.64890   1
  17  -5  -9 360.979 1.66439  -2
  10   5   9 360.979 1.66439   1
  10   5  10-1.32802 0.85466   1
  10  -5  11 3.31652 1.12520   1
  19   5 -12 2491.41 7.96905  -2
  10  -5  12 2491.41 7.96905   1
 -20   5  13-0.85788 1.42926  -2
 -10  -5 -13-0.85788 1.42926   1
  10  -5  14 3.30376 1.05748   1
 -10  -5 -15 13.5092 2.07804   1
  21   5 -15 5128.32 10.7481  -2
  10  -5  15 5128.32 10.7481   1
  22   5 -16 8.41506 1.69261  -2
  10  -5  16 8.41506 1.69261   1
  23   5 -17 1902.33 6.10535  -2
  10  -5  17 1902.33 6.10535   1
 -10  -5 -18-7.12068 1.44591   1
  10   6 -22 503.503 3.79419   1
  -7   6  22 424.885 5.10224  -2
  10  -6 -22 424.885 5.10224   1
  -6   6  21 2658.82 12.7137  -2
  10  -6 -21 2658.82 12.7137   1
   5   6 -20 227.575 2.93458  -2
 -10  -6  20 227.575 2.93458   1
  10   6 -19 1472.92 6.46667   1
  -4   6  19 2085.95 9.94295  -2
  10  -6 -19 2085.95 9.94295   1
  10   6 -18 1707.57 5.51101   1
  -3   6  17 5219.25 9.93742  -2
  10  -6 -17 5219.25 9.93742   1
  -2   6  16 4006.26 10.0827  -2
  10  -6 -16 4006.26 10.0827   1
  10   6 -15 3484.56 8.75650   1
  -1   6  15 3570.78 11.9679  -2
  10  -6 -15 3570.78 11.9679   1
  10  -6 -14 117.966 1.12685   1
   0   6 -13 30570.6 12.3498  -2
 -10  -6  13 30570.6 12.3498   1
   1   6  12 34.8019 0.88257  -2
  10  -6 -12 34.8019 0.88257   1
 -10   6  11 432.965 1.96017   1
   2   6  11 678.923 3.51053  -2
  10  -6 -11 678.923 3.51053   1
 -10   6  10 51197.3 13.6245   1
 -10   6   9 14724.1 18.4666   1
  -3  -6  -9 14677.7 7.34341  -2
 -10   6   9 14677.7 7.34341   1
  -4   6  -8 49305.4 15.7316  -2
 -10  -6   8 49305.4 15.7316   1
  10   6  -7 279.793 1.43798   1
   5   6   7 239.393 1.42630  -2
  10  -6  -7 239.393 1.42630   1
  10  -6  -6 10226.1 5.42338   1
   6   6   5 49121.3 10.8972  -2
  10  -6  -5 49121.3 10.8972   1
  -7   6  -4 8517.83 6.57160  -2
 -10  -6   4 8517.83 6.57160   1
  10  -6  -3 230.241 1.55326   1
   8  -6   3 303.131 2.16982  -2
  10   6  -3 303.131 2.16982   1
  10  -6  -2 5098.93 3.68058   1
  10  -6  -1 4663.11 10.7375   1
  -9  -6  -1 4675.21 3.61857  -2
 -10   6   1 4675.21 3.61857   1
 -10  -6   0 33347.8 12.2113  -2
 -10   6   0 33347.8 12.2113   1
  10   6   1 6019.46 6.83448   1
 -11   6   1 5961.52 5.01823  -2
 -10  -6  -1 5961.52 5.01823   1
  10  -6   2 897.664 1.67815   1
  10  -6   3 11745.5 7.15302   1
 -12   6   3 13657.1 16.7047  -2
 -10  -6  -3 13657.1 16.7047   1
 -13   6   4 48.6661 0.84967  -2
 -10  -6  -4 48.6661 0.84967   1
 -10   6  -5 25792.2 26.6558   1
  14   6  -5 31933.4 11.7036  -2
  10  -6   5 31933.4 11.7036   1
  10  -6   6 8720.08 6.75437   1
  10  -6   7 5228.70 6.43282   1
  15   6  -7 5327.97 9.57235  -2
  10  -6   7 5327.97 9.57235   1
 -16  -6   8 43527.8 20.9224  -2
 -10   6  -8 43527.8 20.9224   1
  10  -6   9 101.775 2.02548   1
  17  -6  -9 143.662 1.56504  -2
  10   6   9 143.662 1.56504   1
  10   6  10 335.685 2.50252   1
 -10  -6 -11 7092.09 12.8367   1
  18   6 -11 8882.25 17.9209  -2
  10  -6  11 8882.25 17.9209   1
  19   6 -12 10866.4 16.7847  -2
  10  -6  12 10866.4 16.7847   1
  20   6 -13 4612.40 9.15076  -2
  10  -6  13 4612.40 9.15076   1
  10  -6  14 14839.7 15.8055   1
 -10  -6 -15 14197.3 27.1016   1
  21   6 -15 14546.9 18.4370  -2
  10  -6  15 14546.9 18.4370   1
 -22   6  16 5340.74 12.1445  -2
 -10  -6 -16 5340.74 12.1445   1
  23   6 -17 1454.13 5.20626  -2
  10  -6  17 1454.13 5.20626   1
  -6   7  21 15.6285 1.64524  -2
  10  -7 -21 15.6285 1.64524   1
  -5   7  20 277.599 3.15807  -2
  10  -7 -20 277.599 3.15807   1
  10   7 -19-2.19059 2.26295   1
  -4   7  19 12.8385 1.77024  -2
  10  -7 -19 12.8385 1.77024   1
  10   7 -18 3.37138 1.24288   1
  -3  -7  17 5105.75 9.80168  -2
  10   7 -17 5105.75 9.80168   1
  -2  -7  16 11.1586 1.48964  -2
  10   7 -16 11.1586 1.48964   1
  10   7 -15 0.79693 2.74350   1
  -1   7  15 909.665 4.68105  -2
  10  -7 -15 909.665 4.68105   1
  10   7 -14-2.76477 1.33299   1
   0   7  13 3.74600 1.58347  -2
  10  -7 -13 3.74600 1.58347   1
   1   7  12 7.54577 0.74057  -2
  10  -7 -12 7.54577 0.74057   1
 -10   7  11-8.13551 0.66831   1
   2   7  11 3.28544 1.23216  -2
  10  -7 -11 3.28544 1.23216   1
  10   7 -10 1.06891 0.48398   1
  10   7  -9-0.21261 1.57062   1
   3   7   9 426.227 1.60383  -2
  10  -7  -9 426.227 1.60383   1
  -4   7  -8 2.21168 0.50732  -2
 -10  -7   8 2.21168 0.50732   1
 -10   7   7 0.01740 0.54530   1
   5   7   7 45.8184 0.94285  -2
  10  -7  -7 45.8184 0.94285   1
  10  -7  -6 0.34514 0.36330   1
 -10   7   5-1.38859 1.07159   1
  -6  -7  -5 6.11307 0.88574  -2
 -10   7   5 6.11307 0.88574   1
   7   7   4 1083.86 3.27021  -2
  10  -7  -4 1083.86 3.27021   1
  10  -7  -3 1.68353 0.81678   1
   8   7   3 8.29638 1.08334  -2
  10  -7  -3 8.29638 1.08334   1
  10  -7  -2 1.90655 0.45592   1
 -10  -7   1-0.26522 0.72466   1
  -9  -7  -1 828.753 1.93128  -2
 -10   7   1 828.753 1.93128   1
  10   7   0 4.03163 0.54887  -2
  10  -7   0 4.03163 0.54887   1
 -10   7  -1-0.18026 0.79955   1
  11   7  -1 2129.07 3.29134  -2
  10  -7   1 2129.07 3.29134   1
  10  -7   2 1.15653 0.48007   1
 -10  -7  -3 2.52310 0.63516   1
 -12  -7   3-1.25773 1.23101  -2
 -10   7  -3-1.25773 1.23101   1
 -13  -7   4 7.89232 0.67155  -2
 -10   7  -4 7.89232 0.67155   1
  14  -7  -5 2.03381 0.67245  -2
  10   7   5 2.03381 0.67245   1
  10  -7   6-5.61268 0.58485   1
  10  -7   7 6.08878 0.62441   1
 -16   7   8 3.01124 1.43533  -2
 -10  -7  -8 3.01124 1.43533   1
  17   7  -9 1491.11 4.66863  -2
  10  -7   9 1491.11 4.66863   1
 -10  -7 -10-3.33059 1.20286   1
  10   7  11 2.30245 1.66370   1
  18   7 -11-10.5388 2.84077  -2
  10  -7  11-10.5388 2.84077   1
 -19   7  12 3774.15 10.3571  -2
 -10  -7 -12 3774.15 10.3571   1
  20   7 -13-0.41699 1.45868  -2
  10  -7  13-0.41699 1.45868   1
  10  -7  14 2.58956 1.18922   1
 -10  -7 -15 9.84769 1.91104   1
 -22   7  16 3.76925 1.46868  -2
 -10  -7 -16 3.76925 1.46868   1
  -5  -8  20 1703.11 9.00016  -2
  10   8 -20 1703.11 9.00016   1
  10   8 -19 287.284 4.61257   1
  -4   8  19 310.497 3.18307  -2
  10  -8 -19 310.497 3.18307   1
  10   8 -18 10800.0 17.0694   1
  -4   8  18 10397.0 22.6426  -2
  10  -8 -18 10397.0 22.6426   1
  -3   8  17 50.4625 1.87500  -2
  10  -8 -17 50.4625 1.87500   1
  -2   8  16 4563.23 14.1213  -2
  10  -8 -16 4563.23 14.1213   1
  10   8 -15 4047.96 14.4523   1
  -1   8  15 3925.34 9.29304  -2
  10  -8 -15 3925.34 9.29304   1
 -10  -8  14 1858.68 5.47165   1
   0  -8  13 30372.4 22.1537  -2
  10   8 -13 30372.4 22.1537   1
   1   8  12 3164.09 8.80893  -2
  10  -8 -12 3164.09 8.80893   1
  10   8 -11 173.803 2.46242   1
   2   8  11 193.484 1.71891  -2
  10  -8 -11 193.484 1.71891   1
  10  -8 -10 56509.1 16.8174   1
  10   8  -9 775.176 5.56166   1
   3   8   9 755.666 2.08901  -2
  10  -8  -9 755.666 2.08901   1
  -4  -8  -8 34654.7 16.2826  -2
 -10   8   8 34654.7 16.2826   1
  10   8  -7 156.551 1.79148   1
   5   8   7 135.615 1.96112  -2
  10  -8  -7 135.615 1.96112   1
 -10   8   6 9190.99 6.70879   1
  10   8  -5 37412.2 18.7096   1
   6   8   5 45771.6 19.9539  -2
  10  -8  -5 45771.6 19.9539   1
  -7   8  -4 967.555 2.88110  -2
 -10  -8   4 967.555 2.88110   1
 -10  -8   3 28470.8 13.9755   1
   8   8   3 34201.7 20.1694  -2
  10  -8  -3 34201.7 20.1694   1
  10  -8  -2 27693.7 11.2643   1
  10  -8  -1 512.821 2.34018   1
   9   8   1 511.116 2.21079  -2
  10  -8  -1 511.116 2.21079   1
 -10   8   0 66596.3 20.6518  -2
 -10  -8   0 66596.3 20.6518   1
  11   8  -1 9388.22 5.82186  -2
  10  -8   1 9388.22 5.82186   1
 -10   8  -2 278.051 1.18354   1
 -10   8  -3 21431.8 11.3167   1
  12  -8  -3 23923.0 18.4473  -2
  10   8   3 23923.0 18.4473   1
  13   8  -4 3574.72 5.23196  -2
  10  -8   4 3574.72 5.23196   1
  14  -8  -5 28674.7 13.4619  -2
  10   8   5 28674.7 13.4619   1
  10  -8   6 11463.7 9.17678   1
 -10  -8  -7 764.182 5.78638   1
  15   8  -7 748.883 4.16723  -2
  10  -8   7 748.883 4.16723   1
  16   8  -8 35921.3 29.1015  -2
  10  -8   8 35921.3 29.1015   1
  17   8  -9 13572.2 13.6460  -2
  10  -8   9 13572.2 13.6460   1
  10  -8  10 195.698 2.13778   1
 -10  -8 -11 5054.60 11.3999   1
  18   8 -11 5046.96 14.2458  -2
  10  -8  11 5046.96 14.2458   1
 -19   8  12 24.0282 1.56015  -2
 -10  -8 -12 24.0282 1.56015   1
  20   8 -13 8114.98 15.7343  -2
  10  -8  13 8114.98 15.7343   1
  10  -8  14 1244.83 4.80132   1
 -10  -8 -15 1146.33 7.79558   1
  21  -8 -15 1258.00 8.80156  -2
  10   8  15 1258.00 8.80156   1
  10   9 -19 0.87390 2.16905   1
   4   9 -19 9.96580 1.90086  -2
 -10  -9  19 9.96580 1.90086   1
  10   9 -18 6.57039 1.43282   1
  -4   9  18 17.5633 2.83253  -2
  10  -9 -18 17.5633 2.83253   1
  -3   9  17 943.145 4.64808  -2
  10  -9 -17 943.145 4.64808   1
   2   9 -16 2.18682 1.62716  -2
 -10  -9  16 2.18682 1.62716   1
  10   9 -15 1.07829 2.73874   1
  -1   9  15 834.494 4.60563  -2
  10  -9 -15 834.494 4.60563   1
  10  -9 -14-6.35217 1.14257   1
   0   9  13 18.8458 1.33290  -2
  10  -9 -13 18.8458 1.33290   1
  -1   9 -12 36.3109 1.53008  -2
 -10  -9  12 36.3109 1.53008   1
   2   9  11-2.23548 1.52956  -2
  10  -9 -11-2.23548 1.52956   1
  10  -9 -10 2.23049 0.94052   1
  10   9  -9-5.93152 1.58123   1
  -3   9  -9 136.553 1.70724  -2
 -10  -9   9 136.553 1.70724   1
  -4  -9  -8 7.38746 1.10283  -2
 -10   9   8 7.38746 1.10283   1
  10   9  -7 3.78750 0.91686   1
   5   9   7 2129.78 5.95420  -2
  10  -9  -7 2129.78 5.95420   1
 -10   9   6 3.75348 0.58678   1
  10   9  -5 0.46975 1.24865   1
   6   9   5 3.56821 0.76933  -2
  10  -9  -5 3.56821 0.76933   1
   7   9   4 436.433 1.94814  -2
  10  -9  -4 436.433 1.94814   1
  10  -9  -3 2.70614 0.67965   1
   8   9   3 15.5409 1.06382  -2
  10  -9  -3 15.5409 1.06382   1
  10  -9  -2-1.45522 0.53211   1
  10  -9  -1 5.47426 0.67721   1
   9   9   1 13.0824 1.81677  -2
  10  -9  -1 13.0824 1.81677   1
  10  -9   0 4.82535 0.80042  -2
  10   9   0 4.82535 0.80042   1
  10   9   1-2.08919 1.35098   1
 -11   9   1 194.890 1.25621  -2
 -10  -9  -1 194.890 1.25621   1
  10  -9   2 4.01963 0.64914   1
 -10   9  -3-0.44432 0.80504   1
  12   9  -3-1.80514 1.21226  -2
  10  -9   3-1.80514 1.21226   1
  13   9  -4 531.517 2.69461  -2
  10  -9   4 531.517 2.69461   1
  14   9  -5-4.29557 1.32689  -2
  10  -9   5-4.29557 1.32689   1
  10  -9   6 5.59642 1.05915   1
 -10  -9  -7 0.06659 2.04547   1
  15   9  -7 80.1129 2.06364  -2
  10  -9   7 80.1129 2.06364   1
  16   9  -8 4.48818 1.52934  -2
  10  -9   8 4.48818 1.52934   1
  17   9  -9 670.785 3.61486  -2
  10  -9   9 670.785 3.61486   1
  10  -9  10 1.04989 1.15587   1
 -10  -9 -11 4.80533 1.46223   1
  19   9 -12 1614.70 6.97846  -2
  10  -9  12 1614.70 6.97846   1
  20   9 -13-0.40605 1.50967  -2
  10  -9  13-0.40605 1.50967   1
  10  -9  14 2.92211 1.15689   1
  10  10 -18 7655.04 14.5878   1
  -4  10  18 9199.15 21.9452  -2
  10 -10 -18 9199.15 21.9452   1
  -3  10  17 9271.95 17.9292  -2
  10 -10 -17 9271.95 17.9292   1
  -2 -10  16 9425.01 17.2495  -2
  10  10 -16 9425.01 17.2495   1
  10  10 -15 16893.7 30.6930   1
  -1  10  15 16984.8 19.7194  -2
  10 -10 -15 16984.8 19.7194   1
  10 -10 -14 109.005 1.67938   1
   0  10 -13 108.342 1.82049  -2
 -10 -10  13 108.342 1.82049   1
   1  10  12 1225.04 5.91310  -2
  10 -10 -12 1225.04 5.91310   1
 -10 -10  11 546.637 4.50060   1
 -10 -10  10 3864.86 13.1571   1
   2  10  10 4267.70 13.2404  -2
  10 -10 -10 4267.70 13.2404   1
   3  10   9 9388.87 14.4608  -2
  10 -10  -9 9388.87 14.4608   1
   4  10   8 100132. 59.6705  -2
  10 -10  -8 100132. 59.6705   1
 -10 -10   7 811.591 6.07601   1
   5  10   7 806.331 5.65735  -2
  10 -10  -7 806.331 5.65735   1
  10 -10  -6 5655.93 8.53288   1
 -10  10   5 35147.5 36.1096   1
   6  10   5 54843.4 29.3897  -2
  10 -10  -5 54843.4 29.3897   1
   7  10   4 3750.81 7.85707  -2
  10 -10  -4 3750.81 7.85707   1
 -10 -10   3 2730.54 7.18165   1
  -8  10  -3 3902.82 10.8693  -2
 -10 -10   3 3902.82 10.8693   1
  10 -10  -2 1110.60 3.06038   1
 -10 -10   1 3051.94 7.26472   1
   9  10   1 3158.61 6.72729  -2
  10 -10  -1 3158.61 6.72729   1
  10  10   0 26797.3 20.6141  -2
  10 -10   0 26797.3 20.6141   1
  10 -10   1 1598.33 5.27133   1
 -11  10   1 1543.58 7.41486  -2
 -10 -10  -1 1543.58 7.41486   1
 -10 -10  -2 273.846 2.58316   1
 -10 -10  -3 57564.4 46.2548   1
  12 -10  -3 69653.4 34.6596  -2
  10  10   3 69653.4 34.6596   1
  13  10  -4 588.616 3.11259  -2
  10 -10   4 588.616 3.11259   1
  14  10  -5 1810.89 4.99450  -2
  10 -10   5 1810.89 4.99450   1
  10 -10   6 5184.54 8.68030   1
 -10 -10  -7 176.545 3.40958   1
  15  10  -7 216.471 2.57456  -2
  10 -10   7 216.471 2.57456   1
  16  10  -8 584.527 4.22668  -2
  10 -10   8 584.527 4.22668   1
 -17  10   9 425.532 2.86241  -2
 -10 -10  -9 425.532 2.86241   1
  10 -10  10 9363.64 12.7211   1
 -10 -10 -11 9268.89 21.0778   1
  18  10 -11 11861.2 17.3896  -2
  10 -10  11 11861.2 17.3896   1
 -19  10  12 13573.3 25.4971  -2
 -10 -10 -12 13573.3 25.4971   1
 -10 -10 -13 10445.2 22.7036   1
  20 -10 -13 12745.9 19.5219  -2
  10  10  13 12745.9 19.5219   1
  -3  11  17 3546.58 11.2091  -2
  10 -11 -17 3546.58 11.2091   1
   2  11 -16 9.40235 1.73899  -2
 -10 -11  16 9.40235 1.73899   1
  10  11 -15-3.50736 1.28240   1
  10  11 -14 12.3130 1.38657   1
  -1  11  14 262.836 4.30235  -2
  10 -11 -14 262.836 4.30235   1
   0  11  13 1.50780 1.94408  -2
  10 -11 -13 1.50780 1.94408   1
   1  11  12 272.059 3.81370  -2
  10 -11 -12 272.059 3.81370   1
  10  11 -11-0.94232 2.48422   1
   2  11  11 11.5259 2.11794  -2
  10 -11 -11 11.5259 2.11794   1
  10 -11 -10-0.08016 1.65497   1
   3  11   9 1951.73 6.62906  -2
  10 -11  -9 1951.73 6.62906   1
   4  11   8 2.53987 1.64018  -2
  10 -11  -8 2.53987 1.64018   1
 -10 -11   7 4.54297 2.70697   1
   5  11   7 289.993 3.68422  -2
  10 -11  -7 289.993 3.68422   1
  10 -11  -6 2.35608 1.39861   1
 -10 -11   5 1.80964 2.33846   1
  -7  11  -4 3.05781 2.19128  -2
 -10 -11   4 3.05781 2.19128   1
 -10 -11   3-1.03406 2.19718   1
 -10 -11   2-4.98381 2.12448   1
 -10 -11   1 5.31223 2.13548   1
 -10  11   0 0.66896 1.38838  -2
 -10 -11   0 0.66896 1.38838   1
  10 -11   1-0.14612 1.27640   1
  10 -11   2 1.85885 1.16725   1
 -10 -11  -3 4.68390 2.06961   1
  12  11  -3 8.69464 2.26782  -2
  10 -11   3 8.69464 2.26782   1
 -13  11   4 666.642 4.20486  -2
 -10 -11  -4 666.642 4.20486   1
  14  11  -5 9.78631 1.60566  -2
  10 -11   5 9.78631 1.60566   1
  10 -11   6-5.14345 0.92803   1
 -10 -11  -7-3.08764 1.58075   1
  15  11  -7 691.899 5.69563  -2
  10 -11   7 691.899 5.69563   1
 -16  11   8 6.05156 2.11265  -2
 -10 -11  -8 6.05156 2.11265   1
 -10 -11  -9 17.0690 1.68317   1
  17  11  -9 260.688 2.93184  -2
  10 -11   9 260.688 2.93184   1
  10  11  10 1.62876 1.01345   1
 -10 -11 -11-14.2466 1.51959   1
  18 -11 -11 4.98900 1.82862  -2
  10  11  11 4.98900 1.82862   1
 -19  11  12 2565.68 8.76773  -2
 -10 -11 -12 2565.68 8.76773   1
  10  12 -15 53.7303 2.16612   1
  -1  12  15 61.6569 2.76863  -2
  10 -12 -15 61.6569 2.76863   1
  10  12 -14 147.436 3.30133   1
   0  12  13 47465.6 37.9172  -2
  10 -12 -13 47465.6 37.9172   1
   1 -12  12 329.141 5.99264  -2
  10  12 -12 329.141 5.99264   1
  10  12 -11 447.479 5.41837   1
   2  12  11 485.952 5.08511  -2
  10 -12 -11 485.952 5.08511   1
  10 -12 -10 54484.8 51.6312   1
   3  12   9 314.142 3.26091  -2
  10 -12  -9 314.142 3.26091   1
   4  12   8 2239.68 9.59267  -2
  10 -12  -8 2239.68 9.59267   1
 -10 -12   7 81.9734 3.37183   1
 -10 -12   6 3706.14 13.2265   1
 -10 -12   5 11984.8 23.4495   1
  -7  12  -4 64.1271 3.72673  -2
 -10 -12   4 64.1271 3.72673   1
 -10 -12   3 23834.0 31.5726   1
 -10 -12   2 29992.7 35.8323   1
 -10 -12   1 252.871 3.82455   1
 -10  12   0 28919.1 34.1869  -2
 -10 -12   0 28919.1 34.1869   1
 -10 -12  -1 2778.27 10.9764   1
 -10 -12  -2 40.7140 2.50073   1
 -10 -12  -3 676.290 3.88880   1
  13  12  -4 2270.76 9.51537  -2
  10 -12   4 2270.76 9.51537   1
 -10 -12  -5 29521.3 36.4003   1
  14  12  -5 32578.6 35.7300  -2
  10 -12   5 32578.6 35.7300   1
 -10 -12  -6 8224.10 13.5344   1
 -10 -12  -7 2111.24 9.74584   1
  15  12  -7 2063.03 6.95246  -2
  10 -12   7 2063.03 6.95246   1
  16  12  -8 58766.5 48.8729  -2
  10 -12   8 58766.5 48.8729   1
 -10 -12  -9 4196.73 13.9657   1
  17  12  -9 4031.26 10.2903  -2
  10 -12   9 4031.26 10.2903   1
 -10 -12 -10 1178.95 4.45745   1
   1 -13  12 40.8016 3.00759  -2
  10  13 -12 40.8016 3.00759   1
  10  13 -11 16.7520 1.80693   1
   2  13  11 12.5373 2.60438  -2
  10 -13 -11 12.5373 2.60438   1
  10 -13 -10 2.77009 1.34556   1
  -4  13  -8-0.92031 2.74607  -2
 -10 -13   8-0.92031 2.74607   1
 -10 -13   7 2.47924 2.17248   1
 -10 -13   6 11.4976 2.34828   1
 -10 -13   5 5.18972 2.10008   1
 -10 -13   3 0.57807 2.04253   1
 -10 -13   2-20.1462 1.68233   1
 -10 -13   1-11.5150 1.53393   1
 -10  13   0-3.39802 2.07037  -2
 -10 -13   0-3.39802 2.07037   1
 -10 -13  -1-1.33755 1.49594   1
 -10 -13  -2 1.11989 1.43663   1
 -10 -13  -3-18.4335 1.40874   1
 -10 -13  -5 5.57694 1.78793   1
  14  13  -5-4.12069 2.26243  -2
  10 -13   5-4.12069 2.26243   1
  10 -13   6-11.4900 1.30598   1
 -10 -13  -7 7.12997 1.31002   1
 -16  13   8-2.06733 2.28446  -2
 -10 -13  -8-2.06733 2.28446   1
   3 -14   9 2721.94 11.8880  -2
  10  14  -9 2721.94 11.8880   1
 -10 -14   7 437.076 4.99168   1
 -10 -14   6 612.502 5.71296   1
  -6  14  -5 35465.8 40.7177  -2
 -10 -14   5 35465.8 40.7177   1
  -7  14  -4 114.385 3.35784  -2
 -10 -14   4 114.385 3.35784   1
 -10 -14   3 459.358 5.28994   1
 -10 -14   2 195.821 3.72197   1
 -10 -14   1 346.887 4.03826   1
 -10  14   0 18635.7 39.6613  -2
 -10 -14   0 18635.7 39.6613   1
 -10 -14  -1 142.148 2.52930   1
 -10 -14  -2 31.4273 1.86329   1
 -10 -14  -3 39941.5 44.1190   1
 -13  14   4 253.455 3.35639  -2
 -10 -14  -4 253.455 3.35639   1
 -11   0  22 0.31042 1.73187   1
  -5   0  21 5.30456 1.67093  -2
  11   0 -21 5.30456 1.67093   1
  -4   0  20 46.6238 1.57565  -2
  11   0 -20 46.6238 1.57565   1
  11   0 -19-0.57553 1.12442   1
  11   0 -18 3.10557 1.16457   1
  -2   0  17 41.4568 1.22249  -2
  11   0 -17 41.4568 1.22249   1
   1   0 -16 11.8154 0.93487  -2
 -11   0  16 11.8154 0.93487   1
  11   0 -15-1.93853 0.72341   1
  11   0 -14 8.17021 0.53259   1
   1   0  13 12.2226 0.68460  -2
  11   0 -13 12.2226 0.68460   1
   2   0  12 17976.7 12.3001  -2
  11   0 -12 17976.7 12.3001   1
  11   0 -11-0.10039 0.38509   1
  11   0 -10 2.06489 0.43466   1
 -11   0   9 1.72186 0.91835   1
   4   0   9 1537.57 2.40091  -2
  11   0  -9 1537.57 2.40091   1
   5   0   8 1.40750 0.51773  -2
  11   0  -8 1.40750 0.51773   1
 -11   0   7-0.73966 0.46041   1
 -11   0   6 0.74860 0.45826   1
   7   0   5 1.12124 0.58370  -2
  11   0  -5 1.12124 0.58370   1
   8   0   4 2943.67 4.09387  -2
  11   0  -4 2943.67 4.09387   1
   9   0   3 3.40154 0.85718  -2
  11   0  -3 3.40154 0.85718   1
  11   0  -2-0.41517 0.43216   1
 -10   0  -1 2752.05 2.74407  -2
 -11   0   1 2752.05 2.74407   1
 -11   0   0 8.63489 0.55549  -2
 -11   0   0 8.63489 0.55549   1
  11   0   1 1.89125 0.46373   1
  12   0  -1 30.8432 0.87205  -2
  11   0   1 30.8432 0.87205   1
 -11   0  -2 1.03414 0.40293   1
 -11   0  -3 0.55435 0.42541   1
  13   0  -3-1.84749 1.64501  -2
  11   0   3-1.84749 1.64501   1
 -14   0   4 1526.42 2.84363  -2
 -11   0  -4 1526.42 2.84363   1
  11   0   5 0.13136 0.76320   1
  15   0  -5 5.12395 0.60928  -2
  11   0   5 5.12395 0.60928   1
 -11   0  -6-0.09914 0.47789   1
  11   0   7 1.08164 0.50333   1
  17   0  -8 1.46491 0.80713  -2
  11   0   8 1.46491 0.80713   1
 -18   0   9 1547.42 3.43649  -2
 -11   0  -9 1547.42 3.43649   1
 -11   0 -10-5.39755 0.64822   1
 -11   0 -11-9.25354 0.66556   1
 -20   0  12 1836.48 7.76051  -2
 -11   0 -12 1836.48 7.76051   1
 -21   0  13 14.3425 2.04216  -2
 -11   0 -13 14.3425 2.04216   1
 -11   0 -14-1.66252 1.40617   1
 -11   0 -15 9.57881 1.72400   1
 -23   0  16-10.1684 2.51669  -2
 -11   0 -16-10.1684 2.51669   1
 -24   0  17 72.0062 2.46009  -2
 -11   0 -17 72.0062 2.46009   1
 -11   0 -18-0.46798 2.03653   1
 -11  -1  23 629.362 5.64094   1
  11   1 -22 2788.79 8.38663   1
  -5  -1  21 412.292 3.33051  -2
  11   1 -21 412.292 3.33051   1
  -4  -1  20 495.836 3.63831  -2
  11   1 -20 495.836 3.63831   1
  11   1 -19 5921.48 9.33825   1
  11   1 -18 538.854 2.86019   1
   2   1 -17 544.064 2.10768  -2
 -11  -1  17 544.064 2.10768   1
  -1  -1  16 750.595 2.26662  -2
  11   1 -16 750.595 2.26662   1
  11  -1 -15 13457.2 6.99148   1
  11  -1 -14 14512.6 6.92327   1
   1   1  13 2121.23 2.49338  -2
  11  -1 -13 2121.23 2.49338   1
   2  -1  12 30.2941 0.53050  -2
  11   1 -12 30.2941 0.53050   1
  11   1 -11 90.4527 0.71262   1
  11   1 -10 46571.3 8.96137   1
 -11   1   9 236.645 1.81732   1
   4  -1   9 233.916 0.79902  -2
  11   1  -9 233.916 0.79902   1
  -5  -1  -8 677.819 1.56028  -2
 -11   1   8 677.819 1.56028   1
  11   1  -7 2522.36 2.20771   1
  -6   1  -7 2342.79 4.11677  -2
 -11  -1   7 2342.79 4.11677   1
  11  -1  -6 29535.4 6.52002   1
  -7   1  -5 31602.9 7.14888  -2
 -11  -1   5 31602.9 7.14888   1
   8  -1   4 464.038 1.21372  -2
  11   1  -4 464.038 1.21372   1
  11   1  -3 3467.04 7.43301   1
   9   1   3 4176.28 2.56377  -2
  11  -1  -3 4176.28 2.56377   1
 -11   1   2 2876.26 2.11362   1
 -10   1  -1 8520.64 3.34991  -2
 -11  -1   1 8520.64 3.34991   1
  11   1   0 893.139 1.25587  -2
  11  -1   0 893.139 1.25587   1
  11  -1   1 14108.0 10.4312   1
 -12  -1   1 13393.4 4.52489  -2
 -11   1  -1 13393.4 4.52489   1
 -11   1  -2 494.568 1.35729   1
 -11   1  -3 950.888 1.34049   1
 -13   1   3 1035.97 2.48975  -2
 -11  -1  -3 1035.97 2.48975   1
  14   1  -4 9631.38 4.98566  -2
  11  -1   4 9631.38 4.98566   1
  11   1   5 7168.11 12.9618   1
  15  -1  -5 10128.7 4.30038  -2
  11   1   5 10128.7 4.30038   1
  11  -1   6 1654.20 1.97708   1
  11  -1   7 211.042 0.92905   1
 -16   1   7 206.327 2.81318  -2
 -11  -1  -7 206.327 2.81318   1
 -17  -1   8 4176.01 4.71279  -2
 -11   1  -8 4176.01 4.71279   1
  18   1  -9 2891.66 3.04200  -2
  11  -1   9 2891.66 3.04200   1
  11  -1  10 234.795 1.00020   1
  11   1  11 844.295 2.61674   1
 -19   1  11 1291.83 3.80413  -2
 -11  -1 -11 1291.83 3.80413   1
 -20  -1  12 34.9711 1.46960  -2
 -11   1 -12 34.9711 1.46960   1
 -21  -1  13 181.931 1.95128  -2
 -11   1 -13 181.931 1.95128   1
 -11   1 -14 9354.43 11.9110   1
 -11   1 -15 547.586 3.78286   1
 -23   1  16 546.406 4.47445  -2
 -11  -1 -16 546.406 4.47445   1
 -24  -1  17 97.9404 2.32773  -2
 -11   1 -17 97.9404 2.32773   1
 -11   1 -18 3095.07 9.21823   1
   7   2 -24 44.9362 2.66199  -2
 -11  -2  24 44.9362 2.66199   1
  11   2 -23 6.12326 1.37113   1
  11   2 -22 0.17952 1.37572   1
  -5  -2  21-7.63831 1.51436  -2
  11   2 -21-7.63831 1.51436   1
  -4  -2  20 41.7500 1.88266  -2
  11   2 -20 41.7500 1.88266   1
  11   2 -19 5.93660 1.05830   1
  11   2 -18-3.33127 0.83930   1
  -2  -2  17 9.63154 0.95460  -2
  11   2 -17 9.63154 0.95460   1
  -1   2  16 0.19726 0.69222  -2
  11  -2 -16 0.19726 0.69222   1
  11  -2 -15 3.58065 0.48429   1
  11   2 -14 3.37755 0.50108   1
   1   2  13 3.83154 0.56770  -2
  11  -2 -13 3.83154 0.56770   1
   2  -2  12 115.586 0.92513  -2
  11   2 -12 115.586 0.92513   1
  11  -2 -11-0.14671 0.43456   1
  -3   2 -11-0.44298 1.34774  -2
 -11  -2  11-0.44298 1.34774   1
  11   2 -10 1.39360 0.34508   1
  11   2  -9 1.51555 0.75174   1
   4   2   9 6027.97 3.84564  -2
  11  -2  -9 6027.97 3.84564   1
   5   2   8 5.33380 0.43855  -2
  11  -2  -8 5.33380 0.43855   1
 -11   2   7 5.39372 0.33970   1
   6   2   7 5349.25 10.2562  -2
  11  -2  -7 5349.25 10.2562   1
  11  -2  -6 1.72429 0.28695   1
 -11  -2   5 2.24842 0.58977   1
   7   2   5 3.94953 0.41469  -2
  11  -2  -5 3.94953 0.41469   1
   8  -2   4 1523.56 1.97373  -2
  11   2  -4 1523.56 1.97373   1
  11   2  -3-0.21803 0.81044   1
  -9   2  -3-0.29575 0.31968  -2
 -11  -2   3-0.29575 0.31968   1
 -11   2   2-0.13788 0.29048   1
  10   2   1 1088.00 1.18846  -2
  11  -2  -1 1088.00 1.18846   1
  11   2   0 3.06106 0.31372  -2
  11  -2   0 3.06106 0.31372   1
 -11   2  -1 5.51014 0.97087   1
  12   2  -1 2746.34 2.08403  -2
  11  -2   1 2746.34 2.08403   1
  11  -2   2 1.18609 0.31169   1
  11  -2   3 1.32527 0.35376   1
 -13   2   3 1.75924 0.56019  -2
 -11  -2  -3 1.75924 0.56019   1
  14   2  -4 234.306 1.02632  -2
  11  -2   4 234.306 1.02632   1
 -15  -2   5 3.57076 0.47074  -2
 -11   2  -5 3.57076 0.47074   1
  11  -2   6 1.82286 0.35321   1
 -11   2  -7 1.78132 0.39888   1
  16   2  -7 41.5620 2.01881  -2
  11  -2   7 41.5620 2.01881   1
  17   2  -8 1.42295 0.49174  -2
  11  -2   8 1.42295 0.49174   1
 -18  -2   9 3028.82 3.20205  -2
 -11   2  -9 3028.82 3.20205   1
  11   2  10 4.87501 0.45204   1
  11  -2  11-1.55832 0.57867   1
  19  -2 -11 2.73865 2.45776  -2
  11   2  11 2.73865 2.45776   1
  20   2 -12 44.0488 1.02644  -2
  11  -2  12 44.0488 1.02644   1
 -21  -2  13 7.98804 1.19868  -2
 -11   2 -13 7.98804 1.19868   1
 -11   2 -14 10.1953 0.94909   1
 -11   2 -15-3.93666 1.26888   1
  22  -2 -15 461.091 4.88003  -2
  11   2  15 461.091 4.88003   1
 -23  -2  16 2.62817 1.50811  -2
 -11   2 -16 2.62817 1.50811   1
 -24   2  17 774.581 6.40185  -2
 -11  -2 -17 774.581 6.40185   1
 -11   2 -18 6.48716 1.25256   1
  11   3 -23 8017.36 20.5672   1
  11   3 -22 2901.48 8.87728   1
  -5  -3  21 1317.70 6.17151  -2
  11   3 -21 1317.70 6.17151   1
   4   3 -20 7836.83 18.1732  -2
 -11  -3  20 7836.83 18.1732   1
 -11  -3  19 16415.7 19.7648   1
  -3   3  19 18581.7 25.7462  -2
  11  -3 -19 18581.7 25.7462   1
  11  -3 -18 10416.5 12.1919   1
  -2   3  17 2190.79 4.87806  -2
  11  -3 -17 2190.79 4.87806   1
  -1  -3  16 12661.8 12.5408  -2
  11   3 -16 12661.8 12.5408   1
 -11   3  15 7064.20 6.62754   1
   0   3  15 7128.17 14.7903  -2
  11  -3 -15 7128.17 14.7903   1
  11   3 -14 9649.95 6.28137   1
  11  -3 -13 12703.2 20.8015   1
   1   3  13 19409.8 8.81568  -2
  11  -3 -13 19409.8 8.81568   1
  -2  -3 -12 2438.72 3.90504  -2
 -11   3  12 2438.72 3.90504   1
  11   3 -11 26389.2 13.3058   1
  -3   3 -11 30509.8 15.1166  -2
 -11  -3  11 30509.8 15.1166   1
  11  -3 -10 10561.4 5.72610   1
  -4  -3  -9 1828.97 2.06238  -2
 -11   3   9 1828.97 2.06238   1
   5  -3   8 20216.2 8.33277  -2
  11   3  -8 20216.2 8.33277   1
  11  -3  -7 590.323 1.22824   1
  -6   3  -7 574.128 2.47218  -2
 -11  -3   7 574.128 2.47218   1
 -11   3   6 2012.49 1.74147   1
   7  -3   5 179025. 15.6403  -2
  11   3  -5 179025. 15.6403   1
  -8  -3  -4 7741.73 4.34742  -2
 -11   3   4 7741.73 4.34742   1
  11   3  -3 2522.07 4.89567   1
   9   3   3 3908.04 2.71494  -2
  11  -3  -3 3908.04 2.71494   1
  11  -3  -2 195.137 0.70159   1
 -11   3   1 16942.7 16.7550   1
  10   3   1 15173.2 4.49097  -2
  11  -3  -1 15173.2 4.49097   1
  11   3   0 94023.1 12.9072  -2
  11  -3   0 94023.1 12.9072   1
 -11   3  -1 24048.4 12.0858   1
  12  -3  -1 23438.4 7.99958  -2
  11   3   1 23438.4 7.99958   1
  11  -3   2 5350.64 3.42376   1
 -11   3  -3 131.145 0.96093   1
 -13   3   3 205.282 1.46776  -2
 -11  -3  -3 205.282 1.46776   1
 -14  -3   4 10218.7 6.09689  -2
 -11   3  -4 10218.7 6.09689   1
 -11   3  -5 19094.6 21.7077   1
 -15   3   5 20908.5 7.46502  -2
 -11  -3  -5 20908.5 7.46502   1
 -11   3  -6 4208.69 3.50848   1
 -11   3  -7 8248.25 4.99345   1
  16   3  -7 8298.31 13.8848  -2
  11  -3   7 8298.31 13.8848   1
 -17  -3   8 1555.36 2.94114  -2
 -11   3  -8 1555.36 2.94114   1
 -18  -3   9 4885.26 4.31237  -2
 -11   3  -9 4885.26 4.31237   1
  11  -3  10 4878.18 4.64817   1
  11   3  11 2086.86 4.37424   1
  19  -3 -11 7728.95 17.7197  -2
  11   3  11 7728.95 17.7197   1
 -20  -3  12 7061.54 10.5826  -2
 -11   3 -12 7061.54 10.5826   1
  21   3 -13 18196.7 14.0143  -2
  11  -3  13 18196.7 14.0143   1
  11  -3  14 6005.17 8.16017   1
 -11  -3 -15 169.667 3.33662   1
  22  -3 -15 174.605 3.45249  -2
  11   3  15 174.605 3.45249   1
 -23  -3  16 6445.49 15.5286  -2
 -11   3 -16 6445.49 15.5286   1
 -24   3  17 1377.12 5.88445  -2
 -11  -3 -17 1377.12 5.88445   1
 -11   3 -18 1392.62 6.08314   1
 -11  -4  23-4.79379 1.29170   1
  11   4 -22 0.39743 1.41912   1
   5   4 -21 5.97004 1.48217  -2
 -11  -4  21 5.97004 1.48217   1
  -4  -4  20 26.7026 1.77761  -2
  11   4 -20 26.7026 1.77761   1
  11   4 -19-2.62781 1.41826   1
  -3   4  19 15.5786 2.24118  -2
  11  -4 -19 15.5786 2.24118   1
  11  -4 -18-1.31440 1.13650   1
  -2   4  17 44.3902 1.58830  -2
  11  -4 -17 44.3902 1.58830   1
  -1   4  16-1.19258 1.47772  -2
  11  -4 -16-1.19258 1.47772   1
  11   4 -15-5.04770 0.61319   1
   0   4  15 208.873 2.15116  -2
  11  -4 -15 208.873 2.15116   1
  11   4 -14 1.58887 0.51177   1
   1  -4  13 5.20965 0.65758  -2
  11   4 -13 5.20965 0.65758   1
   2  -4  12 8999.60 7.69221  -2
  11   4 -12 8999.60 7.69221   1
  11   4 -11 0.20580 0.62536   1
   3   4  11-1.21323 1.03172  -2
  11  -4 -11-1.21323 1.03172   1
  11  -4 -10 1.53603 0.50973   1
  11  -4  -9 0.18720 1.52587   1
   4   4   9 834.075 1.72350  -2
  11  -4  -9 834.075 1.72350   1
  -5   4  -8 3.31238 0.59784  -2
 -11  -4   8 3.31238 0.59784   1
 -11  -4   7 1.66111 0.54910   1
  -6   4  -7 4.47684 1.02325  -2
 -11  -4   7 4.47684 1.02325   1
  11  -4  -6 0.64283 0.36645   1
 -11   4   5-1.29421 1.10756   1
   7  -4   5-1.14652 0.49113  -2
  11   4  -5-1.14652 0.49113   1
  -8  -4  -4 3778.63 3.52853  -2
 -11   4   4 3778.63 3.52853   1
  11   4  -3 7.25897 1.68668   1
   9  -4   3 5.44966 0.43809  -2
  11   4  -3 5.44966 0.43809   1
  11  -4  -2 1.04706 0.29975   1
 -11   4   1 0.25826 0.90129   1
  10   4   1 2598.44 3.01821  -2
  11  -4  -1 2598.44 3.01821   1
  11   4   0 1.93483 0.52623  -2
  11  -4   0 1.93483 0.52623   1
  11  -4   1-3.09914 0.88164   1
 -12   4   1 514.818 1.45743  -2
 -11  -4  -1 514.818 1.45743   1
  11  -4   2 1.42441 0.45169   1
 -11   4  -3 1.48262 0.55127   1
 -13   4   3-0.93269 1.36416  -2
 -11  -4  -3-0.93269 1.36416   1
 -14  -4   4 463.610 1.55637  -2
 -11   4  -4 463.610 1.55637   1
 -11   4  -5 6.72518 1.45931   1
  15   4  -5 3.58574 0.63546  -2
  11  -4   5 3.58574 0.63546   1
 -11   4  -6 0.27601 0.44890   1
 -11   4  -7 6.87377 0.55875   1
 -16   4   7 212.113 1.97461  -2
[truncated: 548,162 more chars]
